# Supplementary material for: Phenome-wide Mendelian randomization study of plasma triglyceride levels and 2600 disease traits
Source: eLife. 2023 Mar 29;12:e80560. doi: 10.7554/eLife.80560 (PMC10079290; doi:10.7554/eLife.80560)
Supplement: Supplementary file 1. — Shown are the estimates, standard deviations, and p-values of MR results using IVW, MR-Egger, and weighted median methods. 141 SNPs were used as instrumental variables to proxy plasma TG levels. A Bonferroni threshold for statistical significance was set to p<0.05/2600=1.92 × 10–5 for this discovery analysis. [file elife-80560-supp1.xlsx]

## Sheet: Sheet1
Outcome	Description	IVW_Estimate	IVW_Sd	IVW_Pvalue	MRegger_Estimate	MRegger_Sd	MRegger_Pvalue	Median_Estimate	Median_Sd	Median_Pvalue	nsnp	Exposure	mrpresso_GlobalTest_RSSobs	mrpresso_GlobalTest_Pvalue	n_cases_EUR	n_controls_EUR
categorical-20002-both_sexes-1473	Non-cancer illness code, self-reported (high cholesterol)	0.813404	0.0741244	1.33079e-20	0.706256	0.129521	2.19947e-07	0.875368	0.041483	2.50974e-45	141	TG	2861.05	0.0001	51633	368840
phecode-272.1-both_sexes	Hyperlipidemia	0.572556	0.0531124	4.20121e-20	0.468943	0.0924115	1.22303e-06	0.562709	0.0344894	3.43506e-34	141	TG	1318.33	0.0001	44006	376397
icd10-E78-both_sexes	E78 Disorders of lipoprotein metabolism and other lipidaemias	0.565649	0.0525837	4.81531e-20	0.462219	0.0914787	1.34674e-06	0.562693	0.0333037	1.32265e-35	141	TG	1307.51	0.0001	44175	376356
phecode-272-both_sexes	Disorders of lipoid metabolism	0.565392	0.052693	5.65926e-20	0.462922	0.0916818	1.36787e-06	0.556833	0.0333493	4.019e-35	141	TG	1311.98	0.0001	44134	376397
phecode-272.11-both_sexes	Hypercholesterolemia	0.56854	0.0540996	2.09695e-19	0.462447	0.0941195	2.48095e-06	0.570442	0.036247	9.12051e-33	141	TG	1297.42	0.0001	40851	376397
phecode-411.3-both_sexes	Angina pectoris	0.330623	0.04069	2.10805e-13	0.126067	0.0680279	0.0659785	0.304533	0.0425182	4.11867e-11	141	TG	407.396	0.0001	21352	382052
phecode-411-both_sexes	Ischemic Heart Disease	0.287295	0.0354823	2.47396e-13	0.117823	0.0595886	0.0499889	0.278442	0.0364631	3.17145e-12	141	TG	504.504	0.0001	37672	382052
icd10-I20-both_sexes	I20 Angina pectoris	0.315714	0.0391734	3.05014e-13	0.121937	0.0655881	0.0651217	0.289057	0.0438187	8.00037e-10	141	TG	383.271	0.0001	21286	399245
phecode-411.8-both_sexes	Other chronic ischemic heart disease, unspecified	0.321992	0.0402272	4.14721e-13	0.149387	0.068114	0.0299567	0.269417	0.0381027	6.70867e-11	141	TG	544.854	0.0001	31198	382052
icd10-I25-both_sexes	I25 Chronic ischaemic heart disease	0.317243	0.0401756	7.55708e-13	0.148605	0.0681337	0.0308597	0.254655	0.0393248	1.48605e-09	141	TG	546.232	0.0001	31148	389383
phecode-272.13-both_sexes	Mixed hyperlipidemia	1.95653	0.250105	1.13581e-12	2.35143	0.437751	3.19888e-07	2.26008	0.3711	1.02779e-08	141	TG	160.173	0.1572	190	376397
phecode-411.4-both_sexes	Coronary atherosclerosis	0.368008	0.0472054	1.31827e-12	0.152352	0.0795625	0.0575629	0.259019	0.0450887	5.51134e-08	141	TG	587.777	0.0001	23888	382052
categorical-20002-both_sexes-1074	Non-cancer illness code, self-reported (angina)	0.387163	0.0496946	1.35528e-12	0.214773	0.0851691	0.0128063	0.335451	0.0532308	3.58214e-09	141	TG	399.827	0.0001	13408	407065
categorical-6150-both_sexes-2	Vascular/heart problems diagnosed by doctor (Angina)	0.379399	0.0500824	4.42245e-12	0.203244	0.0857843	0.0191996	0.337929	0.0500307	3.5378e-10	141	TG	404.933	0.0001	13411	406213
phecode-411.2-both_sexes	Myocardial infarction	0.34211	0.0470947	2.38718e-11	0.164168	0.0803785	0.0429991	0.280741	0.0526798	3.85111e-07	141	TG	395.849	0.0001	15065	382052
categorical-6150-both_sexes-1	Vascular/heart problems diagnosed by doctor (Heart attack)	0.422902	0.0591711	4.46968e-11	0.146696	0.0995675	0.142924	0.369211	0.0616679	1.70626e-08	141	TG	423.204	0.0001	9813	409811
icd10-M10-both_sexes	M10 Gout	0.578842	0.0820806	7.408e-11	0.562665	0.143644	0.000139979	0.468633	0.107586	2.54465e-05	141	TG	245.387	0.0001	2723	417808
categorical-20002-both_sexes-1075	Non-cancer illness code, self-reported (heart attack/myocardial infarction)	0.413601	0.0594597	1.2314e-10	0.141622	0.100215	0.159841	0.367056	0.0622311	2.63007e-08	141	TG	425.604	0.0001	9743	410730
phecode-411.1-both_sexes	Unstable angina (intermediate coronary syndrome)	0.416846	0.0606315	1.8844e-10	0.113593	0.101435	0.264704	0.40342	0.0756807	3.82741e-07	141	TG	270.162	0.0001	5652	382052
icd10-Z95-both_sexes	Z95 Presence of cardiac and vascular implants and grafts	0.302874	0.0443241	2.34663e-10	0.126784	0.0754019	0.0949235	0.260786	0.0534897	2.90623e-06	141	TG	369.625	0.0001	15774	404757
categorical-20002-both_sexes-1466	Non-cancer illness code, self-reported (gout)	0.538964	0.0863333	4.81515e-09	0.637919	0.150801	4.21244e-05	0.48134	0.0840039	5.91218e-08	141	TG	578.023	0.0001	5989	414484
categorical-2724-both_sexes-2724	Had menopause	-0.320182	0.0524322	9.47965e-09	-0.20002	0.0908372	0.0293165	-0.164431	0.0544206	0.00299141	141	TG	387.369	0.0001	140009	50955
icd10-Z82-both_sexes	Z82 Family history of certain disabilities and chronic diseases leading to disablement	0.211001	0.0348107	1.18491e-08	0.0737753	0.0592639	0.215278	0.173256	0.045381	0.000201525	141	TG	249.857	0.0001	16431	404100
categorical-20002-both_sexes-1400	Non-cancer illness code, self-reported (Peptic ulcer)	0.924771	0.157753	3.13258e-08	1.17073	0.275254	3.84643e-05	0.784285	0.25718	0.0027414	141	TG	139.6	0.5448	413	420060
phecode-274.1-both_sexes	Gout	0.446318	0.0820413	2.31067e-07	0.454221	0.143611	0.00191882	0.353987	0.0936207	0.000230487	141	TG	399.05	0.0001	4509	415559
icd10-I21-both_sexes	I21 Acute myocardial infarction	0.298455	0.0548867	2.33762e-07	0.0569019	0.0927989	0.540763	0.147036	0.0620796	0.0192267	141	TG	383.016	0.0001	10141	410390
phecode-240-both_sexes	Simple and unspecified goiter	-0.745971	0.139506	3.54565e-07	-0.326472	0.240253	0.176391	-0.554806	0.19443	0.00498073	141	TG	181.556	0.0155	691	399034
phecode-274-both_sexes	Gout and other crystal arthropathies	0.400855	0.0762108	5.28316e-07	0.363807	0.133346	0.00718868	0.360654	0.0944441	0.000200872	141	TG	379.464	0.0001	4972	415559
phecode-414-both_sexes	Other forms of chronic heart disease	0.315327	0.0604858	6.52326e-07	0.216245	0.105375	0.0420329	0.230401	0.102609	0.0263079	141	TG	135.883	0.6279	2798	382052
phecode-474.1-both_sexes	Acute tonsillitis	0.644507	0.124151	7.20139e-07	0.619677	0.217525	0.00505628	0.567928	0.203565	0.00600753	141	TG	143.057	0.4639	686	398757
phecode-442.3-both_sexes	Aneurysm of artery of lower extremity	1.16981	0.229727	1.12232e-06	1.63034	0.399176	7.43148e-05	1.29622	0.356372	0.000386423	141	TG	154.146	0.243	215	408565
icd10-J03-both_sexes	J03 Acute tonsillitis	0.618981	0.129087	4.1081e-06	0.699658	0.225868	0.00236066	0.789616	0.220916	0.000482409	141	TG	141.026	0.5085	623	419908
phecode-218-females	Benign neoplasm of uterus	0.176309	0.0372067	5.22584e-06	0.108727	0.0647279	0.0952527	0.0799323	0.0568448	0.161896	141	TG	205.585	0.0001	11556	209602
categorical-20002-both_sexes-1425	Non-cancer illness code, self-reported (cerebral aneurysm)No	0.936451	0.19848	5.70192e-06	0.82137	0.347568	0.0195033	0.739464	0.325863	0.0247818	141	TG	153.166	0.2593	286	420187
phecode-426.3-both_sexes	Bundle branch block	0.233525	0.0504395	8.27116e-06	0.0612455	0.0864205	0.479703	0.12877	0.0781385	0.1016	141	TG	160.488	0.1485	4798	384657
icd10-D25-both_sexes	D25 Leiomyoma of uterus	0.175443	0.0385795	1.16455e-05	0.118103	0.0672267	0.0811557	0.0586256	0.0579909	0.313786	141	TG	207.874	0.0001	10785	409746
phecode-442-both_sexes	Other aneurysm	0.320152	0.0707851	1.28955e-05	0.419881	0.123426	0.000874275	0.451976	0.107536	4.66927e-05	141	TG	170.941	0.055	2586	408565
phecode-747.13-both_sexes	Congenital anomalies of great vessels	0.337334	0.0747242	1.33544e-05	0.578502	0.128435	1.39916e-05	0.495051	0.114039	2.70085e-05	141	TG	184.915	0.0108	2474	416857
phecode-218.1-females	Uterine leiomyoma	0.170316	0.0377517	1.35148e-05	0.107105	0.0657357	0.105507	0.0518833	0.0580479	0.372962	141	TG	206.603	0.0001	11274	209602
phecode-474-both_sexes	Acute and chronic tonsillitis	0.298776	0.0682468	2.32921e-05	0.275729	0.11956	0.0225783	0.337698	0.109059	0.0023664	141	TG	139.683	0.5392	2244	398757
icd10-I50-both_sexes	I50 Heart failure	0.177907	0.0412451	3.01671e-05	0.195304	0.072191	0.0076768	0.11018	0.0634396	0.084628	141	TG	161.48	0.1351	7448	413083
icd10-Z96-both_sexes	Z96 Presence of other functional implants	-0.12918	0.0299978	3.10342e-05	-0.0382413	0.0516462	0.460277	-0.0719893	0.0385623	0.0640169	141	TG	260.316	0.0001	24348	396183
phecode-428.2-both_sexes	Heart failure NOS	0.178082	0.0414007	3.16438e-05	0.196071	0.0724603	0.00766504	0.112602	0.0658148	0.0893165	141	TG	162.825	0.117	7451	412106
phecode-428-both_sexes	Congestive heart failure; nonhypertensive	0.17802	0.0414023	3.18564e-05	0.195253	0.072468	0.00792243	0.110812	0.0657076	0.0939386	141	TG	162.486	0.1208	7452	412106
phecode-401-both_sexes	Hypertension	0.140949	0.0327917	3.20374e-05	0.0335071	0.0562969	0.552688	0.171756	0.0255931	4.43181e-10	141	TG	803.543	0.0001	94311	325488
icd10-G71-both_sexes	G71 Primary disorders of muscles	-0.944961	0.22113	3.53847e-05	-0.584889	0.385577	0.131558	-0.588892	0.373375	0.117004	141	TG	126.453	0.8201	175	420356
phecode-401.1-both_sexes	Essential hypertension	0.139973	0.0328216	3.66204e-05	0.0329817	0.0563583	0.559353	0.17173	0.0259517	7.19392e-10	141	TG	806.285	0.0001	94062	325488
icd10-I35-both_sexes	I35 Nonrheumatic aortic valve disorders	0.315894	0.0738003	3.67977e-05	0.483357	0.125314	0.00018333	0.373481	0.094718	0.000133171	126	TG	213.08	0.0001	3479	417052
icd10-H31-both_sexes	H31 Other disorders of choroid	-0.755477	0.177739	3.87331e-05	-0.159002	0.304817	0.602757	-0.413986	0.325699	0.205812	141	TG	98.7703	0.9981	230	420301
phecode-614.32-females	Chronic inflammatory pelvic disease	0.702492	0.166547	4.403e-05	0.673867	0.291446	0.0222385	0.579622	0.246261	0.0199787	141	TG	169.273	0.065	451	217500
icd10-I51-both_sexes	I51 Complications and ill-defined descriptions of heart disease	0.168839	0.0400501	4.44264e-05	0.140234	0.0700451	0.0472247	0.1224	0.0670592	0.0700937	141	TG	128.18	0.788	6115	414416
phecode-395.2-both_sexes	Nonrheumatic aortic valve disorders	0.293738	0.0697224	4.49047e-05	0.466972	0.120745	0.000168334	0.363748	0.0972512	0.000267253	141	TG	224.452	0.0001	3488	400902
icd10-H58-both_sexes	H58 Other disorders of eye and adnexa in diseases classified elsewhere	-1.16552	0.278021	4.87141e-05	-0.407063	0.480133	0.398001	-0.901446	0.482399	0.0637579	141	TG	129.384	0.767	123	420408
icd10-Y83-both_sexes	Y83 Surgical operation and other surgical procedures as the cause of abnormal reaction of the patient, or of later complication, without mention of misadventure at the time of the procedure	0.108842	0.0259632	4.87232e-05	0.101678	0.0454416	0.026841	0.108459	0.0381825	0.00517584	141	TG	183.155	0.0129	21647	398884
categorical-20002-both_sexes-1462	Non-cancer illness code, self-reported	0.495151	0.118264	4.97493e-05	0.519205	0.206895	0.0132376	0.366913	0.160386	0.023654	141	TG	238	0.0001	1275	419198
phecode-528.5-both_sexes	Diseases of lips	0.470375	0.112485	5.07651e-05	0.270706	0.195789	0.168991	0.325804	0.187169	0.0839336	141	TG	139.064	0.5541	808	413830
phecode-851-both_sexes	Complications of transplants and reattached limbs	0.108549	0.0260492	5.37384e-05	0.102681	0.045591	0.0258765	0.10796	0.0352255	0.00261365	141	TG	184.289	0.0113	21709	390518
phecode-363-both_sexes	Chorioretinal inflammations, scars, and other disorders of choroid	-0.749949	0.180822	5.80096e-05	-0.193744	0.311176	0.534556	-0.466247	0.326637	0.155687	141	TG	106.232	0.9905	239	404535
phecode-395-both_sexes	Heart valve disorders	0.189495	0.0457535	5.93317e-05	0.310749	0.0791075	0.000134288	0.209106	0.0690715	0.0029372	141	TG	194.066	0.0029	7051	400902
phecode-711.1-both_sexes	Pyogenic arthritis	0.607598	0.146722	5.94459e-05	0.37433	0.255697	0.145463	0.617139	0.246228	0.0133418	141	TG	141.263	0.5033	481	372332
icd10-L30-both_sexes	L30 Other dermatitis	-0.308664	0.0748826	6.4032e-05	-0.195415	0.130523	0.136618	-0.325633	0.115528	0.00552187	141	TG	156.312	0.2054	2079	418452
categorical-6150-both_sexes-4	Vascular/heart problems diagnosed by doctor	0.151931	0.0368631	6.41481e-05	0.034739	0.0633678	0.584426	0.134729	0.0250712	3.13762e-07	141	TG	1126.95	0.0001	113454	306170
categorical-20002-both_sexes-1065	Non-cancer illness code, self-reported	0.154346	0.0377999	7.43493e-05	0.0195742	0.0646651	0.76257	0.162917	0.0230826	7.18067e-11	141	TG	1138.55	0.0001	109307	311166
icd10-S29-both_sexes	S29 Other and unspecified injuries of thorax	-0.902137	0.22258	8.34617e-05	-1.04673	0.389344	0.00805638	-0.952985	0.379664	0.0132088	141	TG	117.363	0.9391	171	420360
phecode-440-both_sexes	Atherosclerosis	0.385968	0.0956331	8.91186e-05	0.52712	0.166814	0.00193693	0.430449	0.126826	0.000896177	141	TG	207.742	0.0001	1725	408565
phecode-516-both_sexes	Abnormal sputum	0.247056	0.06132	9.15141e-05	0.160497	0.106987	0.135841	0.125484	0.0738834	0.0916538	141	TG	273.302	0.0001	5545	414986
phecode-960-both_sexes	Poisoning by antibiotics	0.105145	0.0261318	9.33921e-05	0.107281	0.0457074	0.020331	0.0871093	0.0369654	0.0198336	141	TG	192.688	0.0031	23061	383239
icd10-S83-both_sexes	S83 Dislocation, sprain and strain of joints and ligaments of knee	0.42188	0.105134	9.73278e-05	0.450108	0.184069	0.0157228	0.433726	0.18227	0.0186808	141	TG	129.096	0.7715	864	419667
phecode-477-both_sexes	Epistaxis or throat hemorrhage	0.323802	0.0806516	9.92405e-05	0.220851	0.139059	0.114656	0.135111	0.103217	0.19281	133	TG	237.91	0.0001	2993	398757
categorical-20002-both_sexes-1415	Non-cancer illness code, self-reported	0.229255	0.0573441	0.000102982	0.161425	0.100123	0.109171	0.164752	0.087962	0.063155	141	TG	162.857	0.1163	3671	416802
phecode-204.1-both_sexes	Lymphoid leukemia	-0.549132	0.137461	0.000104184	-0.0602265	0.235228	0.798303	-0.227438	0.197523	0.251508	141	TG	205.037	0.0002	802	414840
icd10-C91-both_sexes	C91 Lymphoid leukaemia	-0.546884	0.137122	0.000106784	-0.0597108	0.234669	0.799526	-0.212892	0.187238	0.257475	141	TG	203.915	0.0003	802	419729
phecode-516.1-both_sexes	Hemoptysis	0.2447	0.0616926	0.000115969	0.151905	0.107586	0.160202	0.102352	0.0755758	0.177822	141	TG	265.614	0.0001	5311	414986
icd10-C44-both_sexes	C44 Other malignant neoplasms of skin	-0.136331	0.0344262	0.000118773	-0.0810993	0.0599827	0.178557	-0.0916511	0.0471325	0.0538348	141	TG	208.378	0.0001	14388	406143
phecode-426.32-both_sexes	Left bundle branch block	0.266152	0.0674622	0.000125613	0.103378	0.116814	0.377694	0.237563	0.106739	0.027637	141	TG	154.644	0.2333	2543	384657
phecode-172.2-both_sexes	Other non-epithelial cancer of skin	-0.135666	0.0344382	0.000128383	-0.0845192	0.0600401	0.161449	-0.102396	0.0455097	0.0260097	141	TG	209.614	0.0001	14453	402691
phecode-854-both_sexes	Complications of cardiac/vascular device, implant, and graft	0.234332	0.0595229	0.000129617	0.148446	0.103858	0.155158	0.252406	0.0940017	0.00812633	141	TG	144.459	0.4308	3057	390518
icd10-R04-both_sexes	R04 Haemorrhage from respiratory passages	0.243034	0.0618595	0.000133577	0.14567	0.107831	0.178918	0.108079	0.0746104	0.149691	141	TG	265.392	0.0001	5279	415252
icd10-G82-both_sexes	G82 Paraplegia and tetraplegia	-0.598511	0.152762	0.000139123	-0.825175	0.266409	0.00236248	-0.642478	0.258652	0.014173	141	TG	119.679	0.9164	379	420152
phecode-359.1-both_sexes	Muscular dystrophies	-0.98516	0.251476	0.000139334	-0.323538	0.435022	0.458296	-0.74593	0.42583	0.0820138	141	TG	127.668	0.801	148	417332
icd10-K72-both_sexes	K72 Hepatic failure, not elsewhere classified	-0.634086	0.162026	0.000141453	-0.519211	0.283644	0.0693165	-0.315493	0.260478	0.227855	141	TG	172.595	0.0453	482	420049
categorical-20002-both_sexes-1541	Non-cancer illness code, self-reported	-0.464766	0.118849	0.000142992	-0.394225	0.207672	0.0597294	-0.578207	0.197277	0.00394803	141	TG	134.193	0.6661	697	419776
phecode-613.7-both_sexes	Other signs and symptoms in breast	0.464852	0.119235	0.000149513	0.374299	0.209024	0.075518	0.460198	0.189991	0.0167054	141	TG	148.322	0.3502	774	418289
icd10-M16-both_sexes	M16 Coxarthrosis [arthrosis of hip]	-0.1342	0.0346391	0.000163676	-0.0636	0.0601812	0.292433	-0.0921289	0.0461457	0.0478211	141	TG	220.161	0.0001	14999	405532
phecode-747.1-both_sexes	Cardiac congenital anomalies	0.219909	0.057078	0.000177195	0.346765	0.0990547	0.000624037	0.207565	0.0932664	0.0276464	141	TG	149.024	0.3364	3400	416857
categorical-20002-both_sexes-1598	Non-cancer illness code, self-reported	0.233371	0.0608026	0.000186997	0.26011	0.106235	0.0155933	0.262162	0.0984596	0.00866117	141	TG	144.118	0.4386	2913	417560
icd10-T82-both_sexes	T82 Complications of cardiac and vascular prosthetic devices, implants and grafts	0.226504	0.0593339	0.000201799	0.150263	0.103601	0.149201	0.254175	0.0929509	0.0070554	141	TG	143.382	0.4552	3053	417478
categorical-20002-both_sexes-1570	Non-cancer illness code, self-reported	-0.49608	0.13093	0.000224	-0.450023	0.228776	0.051164	-0.444838	0.227751	0.0527932	141	TG	116.358	0.947	500	419973
phecode-695.8-both_sexes	Other specified erythematous conditions	-0.922248	0.244831	0.000242707	-0.0231166	0.418128	0.95599	-0.689458	0.31718	0.0314082	141	TG	232.96	0.0001	286	412638
phecode-960.2-both_sexes	Allergy/adverse effect of penicillin	0.0979535	0.0260291	0.00024595	0.122753	0.0454573	0.00778653	0.103589	0.0388043	0.00849416	141	TG	168.612	0.0686	20021	383239
phecode-348.7-both_sexes	Coma	-0.67889	0.180753	0.000252577	-0.534644	0.316313	0.0932233	-0.527749	0.240509	0.029863	141	TG	192.966	0.0031	436	403249
icd10-I88-both_sexes	I88 Nonspecific lymphadenitis	1.07963	0.288257	0.000262386	0.801631	0.503778	0.113827	1.16239	0.479419	0.0166014	141	TG	129.718	0.7581	115	420416
phecode-275.5-both_sexes	Disorders of calcium/phosphorus metabolism	-0.320166	0.0857422	0.00027334	-0.0917985	0.148227	0.536725	-0.28248	0.13034	0.0319073	141	TG	179.497	0.0189	1816	417428
phecode-594.1-both_sexes	Calculus of kidney	0.286794	0.0769612	0.000280922	0.101277	0.133413	0.449063	0.325526	0.0997119	0.00137767	141	TG	295.332	0.0001	3758	411207
phecode-401.21-both_sexes	Hypertensive heart disease	0.790228	0.213419	0.000306002	1.07672	0.372491	0.00446324	0.896629	0.315764	0.00519122	141	TG	172.697	0.0456	280	325488
phecode-695.41-both_sexes	Cutaneous lupus erythematosus	-1.14401	0.309009	0.000306568	-0.027105	0.528792	0.959193	-0.675284	0.428572	0.117361	141	TG	220.982	0.0001	170	411160
categorical-6015-both_sexes-6015	Chest pain felt during physical activity	0.283058	0.0770854	0.000341539	-0.020716	0.131094	0.874667	0.2879	0.112481	0.0115421	141	TG	171.454	0.0514	2237	59010
icd10-D89-both_sexes	D89 Other disorders involving the immune mechanism, not elsewhere classified	-0.624701	0.170322	0.000346749	-0.0921347	0.292742	0.753439	-0.490777	0.259624	0.0607791	141	TG	153.239	0.2576	388	420143
categorical-20002-both_sexes-1628	Non-cancer illness code, self-reported	-0.50464	0.13765	0.000348778	-0.354958	0.240319	0.141931	-0.282171	0.239571	0.240868	141	TG	142.826	0.466	549	419924
phecode-613.9-both_sexes	Breast disorder NOS	-0.0575034	0.015688	0.000349624	-0.0773278	0.0274177	0.00549908	-0.0608726	0.0210586	0.00445821	141	TG	218.811	0.0001
phecode-535.2-both_sexes	Atrophic gastritis	-0.581799	0.159151	0.000362015	-0.673522	0.278793	0.0169973	-0.230405	0.245782	0.350149	141	TG	160.229	0.149	468	379860
phecode-747-both_sexes	Cardiac and circulatory congenital anomalies	0.198798	0.0544177	0.000365203	0.300087	0.0946794	0.00187835	0.22435	0.0914117	0.0153436	141	TG	145.759	0.4014	3674	416857
phecode-440.2-both_sexes	Atherosclerosis of the extremities	0.456426	0.125589	0.000390555	0.735001	0.218094	0.000972856	0.666135	0.16868	0.000123789	141	TG	217.841	0.0001	1040	408565
phecode-428.1-both_sexes	Congestive heart failure (CHF) NOS	0.218345	0.0601919	0.000400055	0.235912	0.105306	0.0266621	0.297324	0.0979015	0.0028511	141	TG	140.567	0.5167	2971	412106
phecode-981-both_sexes	Toxic effect of (non-ethyl) alcohol and petroleum and other solvents	-0.351283	0.0971388	0.00041618	-0.352985	0.170222	0.039956	-0.292284	0.166304	0.0810122	141	TG	145.064	0.4156	1143	419038
icd10-W06-both_sexes	W06 Fall involving bed	-0.598042	0.165947	0.00043491	-0.196786	0.287698	0.495112	-0.347475	0.259329	0.182448	141	TG	154.023	0.2426	414	420117
categorical-2335-both_sexes-2335	Chest pain or discomfort	0.0704401	0.0196072	0.000452442	-0.0324259	0.0326277	0.32204	0.0279996	0.0253721	0.271679	141	TG	268.802	0.0001	65852	350420
icd10-Y79-both_sexes	Y79 Orthopaedic devices associated with adverse incidents	0.939829	0.261814	0.000457059	0.943646	0.458036	0.0412446	0.590968	0.442001	0.183382	141	TG	135.663	0.6305	145	420386
phecode-594-both_sexes	Urinary calculus	0.201371	0.0561702	0.000464604	0.0814473	0.097577	0.40532	0.0723133	0.0658578	0.27408	141	TG	312.23	0.0001	7593	411207
icd10-I11-both_sexes	I11 Hypertensive heart disease	0.756815	0.2116	0.000478442	1.07114	0.368764	0.00427815	0.886813	0.316028	0.00572886	141	TG	170.972	0.0547	280	420251
phecode-426-both_sexes	Cardiac conduction disorders	0.128625	0.0361356	0.000507953	-0.0237471	0.0612288	0.698726	0.065438	0.0572576	0.255043	141	TG	159.194	0.1636	9624	384657
phecode-363.3-both_sexes	Chorioretinal scars	-1.13051	0.319874	0.000554643	-0.355687	0.553791	0.521751	-0.482191	0.49992	0.336441	141	TG	140.555	0.5155	101	404535
phecode-172.1-both_sexes	Melanomas of skin, dx or hx	0.204965	0.0580531	0.000561608	0.13741	0.101342	0.177328	0.206168	0.0933383	0.0288124	141	TG	152.696	0.2676	3398	402691
icd10-L93-both_sexes	L93 Lupus erythematosus	-1.06949	0.303023	0.000564045	-0.0745666	0.520652	0.886326	-0.841158	0.435058	0.0552004	141	TG	208.39	0.0001	166	420365
phecode-276.42-both_sexes	Alkalosis	-0.742922	0.210828	0.000575025	-0.634791	0.368759	0.0873985	-0.798456	0.360391	0.0283389	141	TG	121.509	0.8939	201	409482
phecode-741.4-both_sexes	Joint effusions	0.259038	0.0736273	0.000586272	0.141636	0.128309	0.27156	0.0505983	0.12222	0.679513	141	TG	130.28	0.7461	1769	413456
phecode-394-both_sexes	Rheumatic disease of the heart valves	0.172534	0.0490815	0.000592351	0.160413	0.0858999	0.063946	0.157995	0.0736979	0.0337752	141	TG	144.728	0.4229	4525	400902
phecode-711-both_sexes	Arthropathy associated with infections	0.485831	0.138575	0.000611811	0.239924	0.24124	0.321687	0.244744	0.222504	0.273239	141	TG	153.924	0.2432	589	372332
icd10-J15-both_sexes	J15 Bacterial pneumonia, not elsewhere classified	0.429601	0.122632	0.000617619	0.614171	0.213895	0.00472735	0.421277	0.20951	0.0462696	141	TG	123.169	0.8695	604	419927
icd10-T51-both_sexes	T51 Toxic effect of alcohol	-0.337424	0.0964033	0.000624114	-0.287571	0.168842	0.0907668	-0.23369	0.188254	0.216551	141	TG	137.45	0.5894	1077	419454
phecode-949-both_sexes	Allergies, other	0.529201	0.151442	0.0006365	0.86773	0.262718	0.00121675	0.378438	0.239178	0.11585	141	TG	153.62	0.249	490	412489
phecode-198.2-both_sexes	Secondary malignancy of respiratory organs	-0.234821	0.0672333	0.000640439	-0.227662	0.117715	0.0551443	-0.247611	0.100672	0.0151288	141	TG	187.64	0.0073	3103	367856
icd10-T98-both_sexes	T98 Sequelae of other and unspecified effects of external causes	-0.940538	0.269294	0.000640488	-0.621742	0.470118	0.188165	-1.32738	0.451416	0.00383532	141	TG	129.47	0.7651	131	420400
phecode-645-females	Late pregnancy and failed induction	-0.286214	0.081982	0.000643648	-0.117853	0.142428	0.409394	-0.219431	0.139933	0.119111	141	TG	116.855	0.9428	1329	226172
categorical-20002-both_sexes-1436	Non-cancer illness code, self-reported	0.219371	0.0630867	0.000675078	0.0717078	0.109307	0.512894	0.0867255	0.0910903	0.342696	141	TG	190.053	0.0047	3546	416927
phecode-695-both_sexes	Erythematous conditions	-0.367911	0.106161	0.000702719	0.160239	0.177539	0.368324	-0.14971	0.0984331	0.130532	141	TG	451.963	0.0001	2989	412638
icd10-I72-both_sexes	I72 Other aneurysm	0.457178	0.132589	0.000746062	0.448318	0.231999	0.0553428	0.33757	0.216667	0.121487	141	TG	152.059	0.281	638	419893
icd10-V47-both_sexes	V47 Car occupant injured in collision with fixed or stationary object	0.826077	0.240551	0.000782406	0.656453	0.420736	0.120975	0.919974	0.38814	0.0191413	141	TG	138.258	0.5717	176	420355
icd10-Z88-both_sexes	Z88 Personal history of allergy to drugs, medicaments and biologocal substances	0.0792889	0.0231194	0.000794644	0.102254	0.0403711	0.0124245	0.0603102	0.0331534	0.0710294	141	TG	204.422	0.0003	32513	388018
phecode-359-both_sexes	Muscular dystrophies and other myopathies	-0.565722	0.165444	0.000822412	-0.339063	0.288726	0.242266	-0.373591	0.223979	0.0975571	141	TG	202.606	0.0005	548	417332
phecode-348.8-both_sexes	Encephalopathy, not elsewhere classified	-0.850083	0.249615	0.000861834	-0.705982	0.437041	0.108499	-0.334144	0.379033	0.379521	141	TG	152.132	0.2785	180	403249
phecode-427.1-both_sexes	Paroxysmal tachycardia, unspecified	0.189379	0.0556258	0.000864962	0.140507	0.0972167	0.150626	0.0167353	0.0967835	0.862968	141	TG	165.305	0.0934	3988	384657
phecode-939-both_sexes	Atopic/contact dermatitis due to other or unspecified	-0.225242	0.0665734	0.000928877	-0.170686	0.116378	0.14473	-0.274366	0.0988099	0.00624344	141	TG	173.139	0.0412	2904	412489
icd10-T91-both_sexes	T91 Sequelae of injuries of neck and trunk	-0.573824	0.170212	0.000967495	-0.462145	0.297703	0.122848	-0.552576	0.276079	0.0472693	141	TG	140.877	0.5081	359	420172
phecode-411.9-both_sexes	Other acute and subacute forms of ischemic heart disease	0.296856	0.0881072	0.000973935	0.192804	0.15393	0.212475	0.246495	0.129195	0.0584486	141	TG	202.582	0.0005	1967	382052
icd10-I47-both_sexes	I47 Paroxysmal tachycardia	0.186033	0.0553428	0.000999705	0.134117	0.0967103	0.167725	-0.00434339	0.0905906	0.961828	141	TG	163.951	0.1054	3974	416557
icd10-K70-both_sexes	K70 Alcoholic liver disease	-0.387792	0.115563	0.00101922	-0.161275	0.201252	0.424291	-0.33485	0.176785	0.0602728	141	TG	188.025	0.0068	1044	419487
icd10-Z51-both_sexes	Z51 Other medical care	-0.0920765	0.0276322	0.0011022	-0.0282078	0.0479081	0.556958	-0.0536149	0.0336312	0.113146	141	TG	271.733	0.0001	28828	391703
phecode-626.2-females	Dysmenorrhea	-0.245588	0.0740761	0.00116572	-0.234555	0.129738	0.0727826	-0.208971	0.11704	0.0763516	141	TG	134.626	0.6563	1852	194287
phecode-571.8-both_sexes	Liver abscess and sequelae of chronic liver disease	-0.308995	0.0936439	0.00122776	-0.135958	0.163076	0.405874	-0.1721	0.146059	0.240678	141	TG	163.753	0.1074	1385	408402
phecode-528-both_sexes	Diseases of the oral soft tissues, excluding lesions specific for gingiva and tongue	0.131155	0.0398122	0.00124952	0.112816	0.0696549	0.107577	0.202385	0.0721662	0.00575752	141	TG	99.0396	0.998	4670	413830
icd10-L60-both_sexes	L60 Nail disorders	0.261472	0.0793705	0.00124963	0.0557068	0.137327	0.685624	0.211858	0.142953	0.140585	141	TG	109.203	0.9834	1276	419255
icd10-E04-both_sexes	E04 Other non-toxic goitre	-0.293066	0.0889686	0.00125081	-0.102587	0.154461	0.507687	-0.205907	0.118284	0.0839185	141	TG	205.074	0.0002	1955	418576
phecode-359.2-both_sexes	Myopathy	-0.552496	0.168018	0.00127469	-0.294444	0.292948	0.316591	-0.411793	0.224578	0.0688331	141	TG	206.768	0.0002	542	417332
phecode-850-both_sexes	Hemorrhage or hematoma complicating a procedure	0.155928	0.0475248	0.00130584	-0.0235073	0.0811002	0.772359	0.0483048	0.0649145	0.458046	141	TG	192.487	0.0033	6359	390518
categorical-20544-both_sexes-1	Mental health problems ever diagnosed by a professional	0.267671	0.0816411	0.00131594	0.154922	0.14231	0.278201	0.123051	0.136599	0.36923	141	TG	151.548	0.2904	1686	134269
phecode-703-both_sexes	Diseases of nail, NOS	0.24657	0.0752574	0.00132584	0.0476824	0.130278	0.714918	0.244145	0.14129	0.0861992	141	TG	111.638	0.9748	1448	413211
categorical-20002-both_sexes-1417	Non-cancer illness code, self-reported	-0.285917	0.0873779	0.00134412	-0.41262	0.152313	0.00759701	-0.312084	0.12153	0.0112784	141	TG	187.747	0.0075	1843	418630
categorical-20002-both_sexes-1381	Non-cancer illness code, self-reported	-0.992149	0.303576	0.00136178	0.141731	0.517442	0.784562	-0.492463	0.255054	0.0555263	141	TG	582.904	0.0001	471	420002
phecode-317.11-both_sexes	Alcoholic liver damage	-0.37573	0.115124	0.00138199	-0.179492	0.200795	0.372917	-0.31655	0.175245	0.0730147	141	TG	188.28	0.0066	1053	392046
icd10-S14-both_sexes	S14 Injury of nerves and spinal cord at neck level	-0.919612	0.284373	0.00152373	-0.827588	0.497594	0.09853	-0.564707	0.482917	0.244242	141	TG	123.279	0.869	112	420419
phecode-574.11-both_sexes	Cholelithiasis with acute cholecystitis	-0.282753	0.0877091	0.0015744	-0.300925	0.153541	0.0520068	-0.280276	0.127839	0.0300018	141	TG	198.754	0.0011	1924	399542
phecode-427.4-both_sexes	Cardiac arrest and ventricular fibrillation	0.279422	0.0869231	0.00162195	0.193145	0.151864	0.205558	0.239123	0.141584	0.0934623	141	TG	137.563	0.5856	1358	384657
categorical-20002-both_sexes-1649	Non-cancer illness code, self-reported	-0.677011	0.210789	0.00163669	-0.200544	0.36537	0.58397	-0.427699	0.331135	0.198619	141	TG	147.636	0.3641	244	420229
icd10-N70-both_sexes	N70 Salpingitis and oophoritis	0.441009	0.137842	0.0017038	0.260008	0.240374	0.281266	0.167628	0.224473	0.456461	141	TG	146.338	0.3914	565	419966
icd10-Y51-both_sexes	Y51 Drugs primarily affecting the autonomic nervous system	-0.479625	0.150417	0.00176378	-0.398929	0.263213	0.131889	-0.413154	0.243612	0.0921174	141	TG	133.668	0.6764	435	420096
phecode-427.42-both_sexes	Cardiac arrest	0.275607	0.0864662	0.00177058	0.201758	0.151131	0.184063	0.230888	0.14024	0.101929	141	TG	135.847	0.6257	1355	384657
categorical-20002-both_sexes-1504	Non-cancer illness code, self-reported	-0.664581	0.209264	0.00183818	-0.546379	0.365832	0.137567	-0.676046	0.381977	0.0789273	141	TG	120.882	0.9031	201	420272
icd10-I46-both_sexes	I46 Cardiac arrest	0.275595	0.0869869	0.0018834	0.193783	0.152006	0.204494	0.232099	0.147394	0.117585	141	TG	136.999	0.5992	1349	419182
icd10-C48-both_sexes	C48 Malignant neoplasm of retroperitoneum and peritoneum	-0.625421	0.197828	0.00192484	-0.768752	0.345966	0.0278967	-0.943976	0.304199	0.00231692	141	TG	135.641	0.6321	254	420277
icd10-S62-both_sexes	S62 Fracture at wrist and hand level	-0.414593	0.131181	0.00193092	-0.55807	0.229095	0.0161175	-0.254472	0.234768	0.280259	141	TG	124.118	0.8563	532	419999
phecode-703.1-both_sexes	Ingrowing nail	0.279564	0.0884903	0.00193837	-0.00212589	0.152328	0.988885	0.266188	0.155615	0.0893793	141	TG	113.259	0.9652	1066	413211
phecode-433.5-both_sexes	Cerebral aneurysm	0.428828	0.136507	0.00205193	0.00837607	0.234995	0.971618	0.141367	0.226337	0.53326	141	TG	120.313	0.9091	474	407633
phecode-447.1-both_sexes	Stricture of artery	0.33926	0.108008	0.00205429	0.611738	0.187115	0.00135898	0.446927	0.158043	0.00537333	141	TG	166.369	0.085	1056	408565
phecode-614.51-females	Cervicitis and endocervicitis	0.265556	0.0845695	0.00206072	0.189865	0.147804	0.20108	0.280546	0.143726	0.0529398	141	TG	132.079	0.7102	1363	217500
phecode-599.1-both_sexes	Urinary obstruction	0.185845	0.0592476	0.00208279	0.202167	0.103676	0.0531894	0.202309	0.088374	0.0235621	141	TG	159.866	0.1546	3401	395845
phecode-556.1-both_sexes	Ulceration of intestine	0.375231	0.11984	0.00212054	0.238673	0.209232	0.255954	0.149391	0.178181	0.403224	141	TG	171.982	0.048	886	330270
icd10-K50-both_sexes	K50 Crohn's disease [regional enteritis]	0.274387	0.0876661	0.00212854	0.212827	0.153268	0.167177	0.231943	0.127468	0.070953	141	TG	204.08	0.0003	1978	418553
icd10-N13-both_sexes	N13 Obstructive and reflux uropathy	0.184961	0.0591464	0.0021472	0.212779	0.103482	0.0416342	0.18936	0.0854882	0.0283732	141	TG	159.036	0.1651	3396	417135
phecode-791-both_sexes	Gangrene	-0.379156	0.121499	0.00219204	-0.340502	0.21265	0.111596	-0.315667	0.19003	0.098922	141	TG	157.727	0.1819	791	419740
icd10-N04-both_sexes	N04 Nephrotic syndrome	-0.976931	0.313269	0.00220703	-0.671418	0.546809	0.221566	-0.390791	0.372348	0.295742	141	TG	276.659	0.0001	208	420323
phecode-204-both_sexes	Leukemia	-0.256167	0.0823488	0.00226187	-0.00886986	0.141801	0.950214	-0.123701	0.107943	0.253754	141	TG	208.524	0.0001	2279	414840
phecode-740.1-both_sexes	Osteoarthritis; localized	-0.0994452	0.0319843	0.00227312	-0.0504588	0.0557479	0.366965	-0.0315431	0.0424901	0.459111	141	TG	263.719	0.0001	21684	384458
icd10-M22-both_sexes	M22 Disorders of patella	0.294217	0.0947919	0.00231205	0.37781	0.165669	0.0240984	0.303158	0.155391	0.053062	141	TG	128.837	0.7749	1059	419472
phecode-555.1-both_sexes	Regional enteritis	0.269375	0.0868911	0.00233905	0.222791	0.151998	0.144975	0.21489	0.123253	0.0834438	141	TG	202.949	0.0005	2008	330270
phecode-204.12-both_sexes	Lymphoid leukemia, chronic	-0.453263	0.146061	0.00234207	0.0137063	0.247608	0.95594	-0.237362	0.204144	0.247042	133	TG	172.169	0.0156	650	414840
icd10-K92-both_sexes	K92 Other diseases of digestive system	0.0963567	0.0311311	0.00237587	0.0405844	0.0541948	0.455206	0.0915717	0.0478167	0.0575249	141	TG	152.249	0.2759	12069	408462
phecode-159.4-both_sexes	Malignant neoplasm of retroperitoneum and peritoneum	-0.605352	0.196117	0.00244044	-0.686762	0.343156	0.0473057	-0.950064	0.321676	0.00368658	141	TG	137.098	0.5976	262	400294
phecode-1011-both_sexes	Complications of surgical and medical procedures	0.149424	0.0484551	0.00246288	0.214232	0.0846052	0.0124486	0.20652	0.0739659	0.00596914	141	TG	151.995	0.2811	4890	415641
icd10-C43-both_sexes	C43 Malignant melanoma of skin	0.19876	0.0647455	0.00257276	0.119302	0.112997	0.292889	0.212467	0.100239	0.035805	141	TG	146.24	0.3939	2598	417933
phecode-599.4-both_sexes	Urinary incontinence	0.148236	0.0484121	0.00263718	-0.034018	0.0826256	0.681184	0.0869368	0.0742864	0.243872	141	TG	154.478	0.2339	4908	395845
categorical-20002-both_sexes-1458	Non-cancer illness code, self-reported	0.141764	0.046363	0.00267256	0.0160888	0.0801052	0.841113	0.0747023	0.0754588	0.323895	141	TG	134.753	0.6501	4781	415692
phecode-952-both_sexes	Spinal cord injury without evidence of spinal bone injury	-0.76981	0.252151	0.00271238	-0.882205	0.441164	0.0474793	-0.690952	0.435297	0.114698	141	TG	133.031	0.6895	153	420378
icd10-J39-both_sexes	J39 Other diseases of upper respiratory tract	0.281225	0.0921258	0.00271539	0.322588	0.161226	0.047357	0.334267	0.169095	0.0500292	141	TG	96.2597	0.9991	842	419689
categorical-20002-both_sexes-1162	Non-cancer illness code, self-reported	-0.188155	0.061725	0.0027524	-0.455083	0.104409	2.52768e-05	-0.227599	0.0728511	0.00216779	141	TG	345.806	0.0001	7002	413471
phecode-835-both_sexes	Internal derangement of knee	-0.0875205	0.0287259	0.00276563	-0.064899	0.050217	0.198373	-0.0563351	0.040104	0.162318	141	TG	182.685	0.0129	17832	397432
categorical-20002-both_sexes-1460	Non-cancer illness code, self-reported	-0.26469	0.0870844	0.00282897	-0.193991	0.152277	0.204811	-0.110863	0.14667	0.450998	141	TG	129.698	0.7589	1267	419206
icd10-E05-both_sexes	E05 Thyrotoxicosis [hyperthyroidism]	-0.548156	0.180587	0.00286494	-0.0994579	0.312265	0.75058	-0.225302	0.113635	0.04936	141	TG	977.23	0.0001	2250	418281
categorical-20001-both_sexes-1047	Cancer code, self-reported	-0.798798	0.263461	0.002896	-1.33403	0.457649	0.00414789	-0.527433	0.470714	0.264422	141	TG	102.489	0.9949	108	420365
phecode-580.2-both_sexes	Nephrotic syndrome without mention of glomerulonephritis	-0.594357	0.196191	0.00291823	-0.479428	0.343092	0.164528	-0.314322	0.212892	0.142072	141	TG	322.636	0.0001	621	401927
phecode-574.1-both_sexes	Cholelithiasis	-0.140926	0.0465723	0.00295016	-0.257476	0.0806442	0.00174316	-0.212289	0.0499505	3.88095e-05	141	TG	465.892	0.0001	17278	399542
phecode-529.1-both_sexes	Glossitis	-0.509911	0.168519	0.00295144	-0.137125	0.292568	0.640022	-0.203579	0.281817	0.471265	141	TG	142.064	0.4817	367	413830
icd10-G93-both_sexes	G93 Other disorders of brain	0.207546	0.0686748	0.00298528	0.431336	0.117921	0.000360053	0.393495	0.113216	0.000678999	141	TG	131.849	0.7132	2064	418467
phecode-442.1-both_sexes	Aortic aneurysm	0.24361	0.0809032	0.00308887	0.354993	0.141081	0.0129983	0.280092	0.126816	0.0288249	141	TG	175.62	0.0316	2034	408565
icd10-D14-both_sexes	D14 Benign neoplasm of middle ear and respiratory system	-0.538215	0.178761	0.00309189	-0.735193	0.312253	0.0199482	-0.34645	0.297722	0.246537	141	TG	127.15	0.8089	293	420238
phecode-112-both_sexes	Candidiasis	-0.217936	0.0725006	0.00313827	-0.046699	0.125687	0.710795	-0.196717	0.0982946	0.0472934	141	TG	214.144	0.0001	3072	416798
phecode-614.33-females	Pelvic inflammatory disease, NOS	-0.505106	0.168257	0.00317716	-0.244479	0.293691	0.406591	-0.518502	0.278013	0.0642702	141	TG	142.282	0.4764	370	217500
categorical-20002-both_sexes-1154	Non-cancer illness code, self-reported	0.13953	0.0464828	0.00317955	0.0538985	0.080864	0.506175	0.0426848	0.0594593	0.474025	141	TG	279.655	0.0001	10017	410456
phecode-386.2-both_sexes	Peripheral or central vertigo	0.466866	0.155615	0.00319541	0.636138	0.271804	0.0206841	0.402812	0.247718	0.106179	141	TG	145.302	0.4103	441	412745
icd10-N20-both_sexes	N20 Calculus of kidney and ureter	0.204909	0.068347	0.00321589	0.0530052	0.118637	0.655727	0.137329	0.081169	0.0928922	141	TG	340.646	0.0001	5530	415001
icd10-I45-both_sexes	I45 Other conduction disorders	0.215244	0.0718684	0.00324663	0.000445799	0.123783	0.997132	0.134849	0.0975291	0.168972	141	TG	209.598	0.0001	3083	417448
categorical-20002-both_sexes-1479	Non-cancer illness code, self-reported	0.271989	0.0909235	0.00328251	0.368074	0.158845	0.0219544	0.277293	0.146548	0.060534	141	TG	140.506	0.5161	1258	419215
phecode-580.3-both_sexes	Nephritis and nephropathy without mention of glomerulonephritis	-0.439907	0.14708	0.00328731	-0.474781	0.257454	0.0672922	-0.459124	0.189949	0.0169319	141	TG	224.757	0.0001	769	401927
phecode-380.1-both_sexes	Otitis externa	0.365798	0.122437	0.00332065	0.189165	0.213577	0.377309	0.415126	0.20936	0.0493434	141	TG	133.77	0.6769	653	418820
phecode-242-both_sexes	Thyrotoxicosis with or without goiter	-0.544155	0.182146	0.00332246	-0.11074	0.315248	0.725911	-0.239016	0.117457	0.043746	141	TG	1008.42	0.0001	2288	399034
phecode-287.31-both_sexes	Primary thrombocytopenia	-0.447123	0.149767	0.00334313	-0.490024	0.262131	0.0636731	-0.265614	0.244072	0.27835	141	TG	154.596	0.233	506	416975
icd10-K75-both_sexes	K75 Other inflammatory liver diseases	-0.416029	0.139602	0.00339838	-0.29962	0.244137	0.221799	-0.242358	0.182839	0.187154	141	TG	236.168	0.0001	899	419632
phecode-580-both_sexes	Nephritis; nephrosis; renal sclerosis	-0.26824	0.0900693	0.00341886	-0.350608	0.157433	0.0275536	-0.232143	0.126337	0.068257	141	TG	187.135	0.0085	1716	401927
phecode-574-both_sexes	Cholelithiasis and cholecystitis	-0.136275	0.0458595	0.00348843	-0.255667	0.0793414	0.00158389	-0.199075	0.048125	6.04958e-05	141	TG	491.341	0.0001	19097	399542
icd10-I24-both_sexes	I24 Other acute ischaemic heart diseases	0.256829	0.0864291	0.00348863	0.17432	0.151088	0.250578	0.22342	0.12651	0.0795713	141	TG	195.906	0.002	1967	418564
icd10-K80-both_sexes	K80 Cholelithiasis	-0.137624	0.046384	0.00353705	-0.263912	0.0801468	0.00125775	-0.206201	0.0492106	4.9105e-05	141	TG	454.143	0.0001	16983	403548
phecode-496.21-both_sexes	Obstructive chronic bronchitis	-0.136282	0.0460446	0.00361637	0.00471906	0.0793035	0.952634	-0.0370425	0.0525526	0.482065	141	TG	283.093	0.0001	11537	379656
phecode-740.11-both_sexes	Osteoarthrosis, localized, primary	-0.120407	0.0407258	0.00365255	-0.0907553	0.071238	0.204799	-0.111433	0.0585245	0.0589561	141	TG	212.624	0.0001	10108	384458
phecode-619.5-females	Noninflammatory disorders of vulva and perineum	0.236872	0.080432	0.00378304	0.132413	0.14038	0.347189	0.10449	0.139784	0.45601	141	TG	132.993	0.6911	1520	212227
phecode-695.4-both_sexes	Lupus (localized and systemic)	-0.778757	0.265378	0.00390528	0.243633	0.451952	0.590701	-0.379282	0.232108	0.10449	141	TG	478.573	0.0001	506	411160
icd10-R07-both_sexes	R07 Pain in throat and chest	0.0668795	0.022772	0.00390793	0.0192578	0.039239	0.624396	0.0700953	0.0300021	0.0209676	134	TG	202.818	0.0003	36262	384269
icd10-J44-both_sexes	J44 Other chronic obstructive pulmonary disease	-0.130082	0.0443583	0.00392911	0.00320247	0.0764551	0.966649	-0.0430867	0.0533834	0.420967	141	TG	265.113	0.0001	11536	408995
phecode-376-both_sexes	Disorders of the orbit	-0.53412	0.182323	0.00396482	-0.000535936	0.314424	0.998642	0.0858427	0.285618	0.764203	141	TG	160.523	0.1457	353	410363
phecode-550.1-both_sexes	Inguinal hernia	0.132713	0.0454446	0.00407699	-0.0107106	0.0781299	0.89116	0.0337354	0.0465748	0.470073	141	TG	440.788	0.0001	18559	363863
phecode-731.1-both_sexes	Osteitis deformans [Paget's disease of bone]	0.566676	0.19428	0.00412048	0.374253	0.339585	0.272327	0.570952	0.306945	0.0649679	141	TG	154.19	0.2391	299	397835
icd10-B37-both_sexes	B37 Candidiasis	-0.207939	0.0714217	0.00418783	-0.0431364	0.123867	0.728181	-0.14062	0.09635	0.146675	141	TG	207.342	0.0001	3055	417476
icd10-C21-both_sexes	C21 Malignant neoplasm of anus and anal canal	0.716171	0.246107	0.00420587	-0.0382564	0.423634	0.928175	0.518634	0.322234	0.10976	141	TG	193.617	0.0029	236	420295
phecode-411.41-both_sexes	Aneurysm and dissection of heart	0.616901	0.212321	0.00426307	0.631264	0.371768	0.0917447	0.484351	0.337604	0.153611	141	TG	137.112	0.5961	224	382052
phecode-593-both_sexes	Hematuria	0.193127	0.0664891	0.00427444	-0.0136712	0.1144	0.905049	0.115755	0.0452484	0.0115843	141	TG	997.382	0.0001	18229	386584
phecode-244.1-both_sexes	Secondary hypothyroidism	-0.399204	0.137475	0.00428488	-0.23101	0.239837	0.337122	-0.376467	0.146926	0.0114552	141	TG	360.75	0.0001	1430	399034
phecode-594.8-both_sexes	Renal colic	0.218096	0.0751387	0.00430096	0.342267	0.130974	0.00995632	0.239162	0.119801	0.0478375	141	TG	166.472	0.0847	2183	411207
icd10-I71-both_sexes	I71 Aortic aneurysm and dissection	0.235112	0.0810031	0.00430191	0.343811	0.141279	0.0162208	0.257191	0.126279	0.0435669	141	TG	176.277	0.0282	2031	418500
phecode-214.1-both_sexes	Lipoma of skin and subcutaneous tissue	0.159616	0.0550179	0.0043193	0.127542	0.0962298	0.187216	0.0856148	0.0743611	0.251555	141	TG	217.456	0.0001	5425	411864
phecode-242.1-both_sexes	Graves' disease	-0.900542	0.310816	0.00436916	-0.212277	0.538291	0.693924	-0.312928	0.228846	0.173686	141	TG	716.972	0.0001	554	399034
categorical-20002-both_sexes-1087	Non-cancer illness code, self-reported	0.47258	0.163124	0.00437301	0.553151	0.285844	0.0550024	0.283699	0.298476	0.343499	141	TG	115.067	0.9555	314	420159
categorical-20002-both_sexes-1290	Non-cancer illness code, self-reported	0.611656	0.211804	0.00449567	1.25759	0.36451	0.000742394	0.730986	0.365077	0.0471864	141	TG	119.803	0.9149	196	420277
phecode-364.2-both_sexes	Corneal edema	-0.88839	0.307811	0.00451834	-0.518248	0.537447	0.336582	-0.152866	0.504459	0.762317	141	TG	140.954	0.5064	108	404535
categorical-20001-both_sexes-1065	Cancer code, self-reported	-0.496887	0.172333	0.0045572	-0.470939	0.301514	0.120581	-0.33428	0.266924	0.212533	141	TG	157.643	0.1816	388	420085
icd10-J33-both_sexes	J33 Nasal polyp	-0.221297	0.0768232	0.00459408	-0.0281207	0.133037	0.832904	-0.16206	0.0972956	0.0980204	141	TG	273.26	0.0001	3551	416980
icd10-G72-both_sexes	G72 Other myopathies	-0.618925	0.215206	0.00465829	-0.540343	0.376544	0.153531	-0.366012	0.354485	0.30361	141	TG	134.991	0.6444	215	420316
phecode-386-both_sexes	Vertiginous syndromes and other disorders of vestibular system	0.201783	0.0702245	0.00469418	0.212049	0.122922	0.0867374	0.236844	0.108383	0.0305328	141	TG	146.328	0.3887	2213	412745
icd10-Z81-both_sexes	Z81 Family history of mental and behavioural disorders	0.707964	0.247535	0.00488464	0.271879	0.430676	0.528891	0.598779	0.386683	0.123759	141	TG	148.425	0.3468	175	420356
icd10-F41-both_sexes	F41 Other anxiety disorders	0.115098	0.0403364	0.00498159	0.0141505	0.0698194	0.839687	0.121012	0.0572195	0.0362118	141	TG	191.41	0.0038	9006	411525
icd10-S39-both_sexes	S39 Other and unspecified injuries of abdomen, lower back and pelvis	-0.49669	0.174121	0.00499468	-0.977906	0.300861	0.00144594	-0.629367	0.26546	0.0191095	141	TG	159.249	0.1614	386	420145
icd10-S92-both_sexes	S92 Fracture of foot, except ankle	0.625552	0.219394	0.00501397	0.955449	0.382721	0.013712	0.695593	0.336017	0.0402794	141	TG	160.642	0.1441	245	420286
icd10-W19-both_sexes	W19 Unspecified fall	-0.116599	0.0411544	0.00528952	-0.104159	0.0720849	0.150723	-0.118276	0.0648014	0.0701017	141	TG	158.606	0.1701	7145	413386
icd10-I84-both_sexes	I84 Haemorrhoids	0.0607989	0.02151	0.00539469	0.0367237	0.037574	0.330085	0.0249246	0.0335261	0.458462	141	TG	149.738	0.3235	26348	394183
categorical-20002-both_sexes-1191	Non-cancer illness code, self-reported	0.806124	0.28542	0.00542991	0.543481	0.49888	0.277861	0.401276	0.438882	0.362124	141	TG	163.033	0.1141	147	420326
phecode-293.1-both_sexes	Swelling, mass, or lump in head and neck [Space-occupying lesion, intracranial NOS]	0.285006	0.101166	0.00554503	0.0436997	0.175395	0.803612	0.00715704	0.164309	0.965318	141	TG	146.018	0.3965	1049	416916
icd10-S64-both_sexes	S64 Injury of nerves at wrist and hand level	0.334992	0.119406	0.00573949	0.361307	0.208977	0.0860405	0.44053	0.18261	0.0171424	141	TG	148.533	0.3442	768	419763
icd10-I08-both_sexes	I08 Multiple valve diseases	0.163048	0.0583947	0.00596803	0.173098	0.102204	0.0925697	0.163299	0.103293	0.116151	141	TG	116.806	0.9434	2547	417984
phecode-214-both_sexes	Lipoma	0.136559	0.0489503	0.00601031	0.110179	0.0856437	0.200413	0.115262	0.0687978	0.0960945	141	TG	234.514	0.0001	7458	411864
phecode-289-both_sexes	Other diseases of blood and blood-forming organs	-0.242766	0.0872112	0.00611825	-0.25828	0.152648	0.0928881	-0.277918	0.136068	0.0429799	141	TG	157.697	0.1831	1535	410877
icd10-N84-both_sexes	N84 Polyp of female genital tract	0.0924254	0.0332128	0.00613313	0.0507128	0.0579428	0.382963	0.0647903	0.0506592	0.203033	141	TG	162.777	0.1163	11558	408973
icd10-K40-both_sexes	K40 Inguinal hernia	0.12648	0.0455677	0.0062628	-0.0263059	0.0781531	0.73693	0.031326	0.0480228	0.515268	141	TG	444.171	0.0001	18291	402240
phecode-228-both_sexes	Hemangioma and lymphangioma, any site	-0.233068	0.0840214	0.0062946	-0.492844	0.144613	0.000856302	-0.344146	0.126752	0.00745981	141	TG	179.072	0.0196	1871	418660
phecode-149.4-both_sexes	Cancer of larynx	-0.493957	0.178259	0.00634795	-0.264998	0.311519	0.396419	-0.649896	0.28998	0.026589	141	TG	134.813	0.6492	313	418011
phecode-571.6-both_sexes	Primary biliary cirrhosis	-0.48844	0.176271	0.00634879	-0.626293	0.308525	0.0442683	-0.337414	0.302792	0.267041	141	TG	132.841	0.6936	314	408402
icd10-M20-both_sexes	M20 Acquired deformities of fingers and toes	0.114451	0.0414853	0.00657634	0.101754	0.0725836	0.163179	0.0704019	0.053817	0.192959	141	TG	239.795	0.0001	11084	409447
phecode-701.4-both_sexes	Keloid scar	0.515338	0.18695	0.00662001	0.329574	0.326725	0.314863	0.242158	0.323181	0.454936	141	TG	122.686	0.8767	257	413923
phecode-172-both_sexes	Skin cancer	-0.0866082	0.0314198	0.00662133	-0.0651407	0.0549458	0.237825	-0.0729193	0.0392653	0.0653993	141	TG	212.248	0.0001	17691	402691
phecode-735-both_sexes	Acquired foot deformities	0.114152	0.0414158	0.00662572	0.0909209	0.0724402	0.211543	0.0659464	0.0545293	0.228557	141	TG	243.195	0.0001	11304	403527
phecode-496-both_sexes	Chronic airway obstruction	-0.111878	0.0407126	0.00678593	0.0210741	0.0699504	0.763657	-0.0116617	0.0504617	0.817574	141	TG	268.175	0.0001	14310	379656
categorical-20002-both_sexes-1494	Non-cancer illness code, self-reported	0.223674	0.0815016	0.00685667	0.2436	0.142459	0.089503	0.226788	0.142874	0.114694	141	TG	133.808	0.6745	1510	418963
phecode-496.2-both_sexes	Chronic bronchitis	-0.122875	0.0447985	0.00688782	0.0059266	0.0773136	0.939007	-0.0410076	0.0518524	0.430368	141	TG	273.144	0.0001	11764	379656
icd10-F25-both_sexes	F25 Schizoaffective disorders	-0.683039	0.2491	0.00690407	-0.57278	0.435792	0.190896	-1.00026	0.408451	0.0155647	141	TG	135.824	0.6274	159	420372
phecode-198.6-both_sexes	Secondary malignancy of bone	-0.16103	0.0587418	0.00691804	-0.240968	0.102492	0.0201236	-0.21981	0.0936317	0.0202951	141	TG	139.394	0.5432	3017	367856
icd10-Z99-both_sexes	Z99 Dependence on enabling machines and devices, not elsewhere classified	-0.193688	0.0707525	0.00699384	-0.138319	0.123769	0.265682	-0.233203	0.105043	0.0280218	141	TG	155.704	0.2143	2322	418209
icd10-G46-both_sexes	G46 Vascular syndromes of brain in cerebrovascular diseases	0.687275	0.251263	0.00703965	1.42932	0.43263	0.00121312	1.23396	0.45316	0.0072926	141	TG	101.683	0.9956	118	420413
phecode-558-both_sexes	Noninfectious gastroenteritis	0.0886343	0.0324052	0.00704154	0.049652	0.0565957	0.381832	0.073537	0.0429024	0.0887321	141	TG	224.008	0.0001	17088	330270
phecode-595-both_sexes	Hydronephrosis	0.188735	0.0690253	0.00705968	0.242327	0.120687	0.046592	0.232694	0.107168	0.0315937	141	TG	165.563	0.0905	2577	411207
phecode-110.12-both_sexes	Althete's foot	-0.671832	0.246337	0.00720348	-0.591154	0.430966	0.172368	-0.580044	0.383579	0.13274	141	TG	147.47	0.3673	179	416798
icd10-M53-both_sexes	M53 Other dorsopathies, not elsewhere classified	-0.431221	0.158206	0.00723672	-0.151122	0.275281	0.583906	-0.505055	0.26747	0.0610597	141	TG	134.373	0.6598	394	420137
icd10-Y49-both_sexes	Y49 Psychotropic drugs, not elsewhere classified	0.588435	0.21599	0.00726423	0.613708	0.378063	0.106792	0.788975	0.357901	0.0291256	141	TG	124.076	0.8546	196	420335
phecode-1014-both_sexes	Effects of heat, cold and air pressure	-0.47294	0.173599	0.00726527	-0.164438	0.302305	0.587349	-0.0521705	0.270617	0.847408	141	TG	139.26	0.5466	341	420190
icd10-M21-both_sexes	M21 Other acquired deformities of limbs	0.351841	0.129302	0.00733328	0.652906	0.224086	0.00416428	0.296919	0.206159	0.152032	141	TG	154.829	0.2265	682	419849
phecode-272.9-both_sexes	Unspecified disorder of lipoid metabolism	0.469967	0.173058	0.00744787	0.238021	0.302141	0.432165	0.581077	0.292264	0.0487405	141	TG	132.632	0.6984	324	376397
phecode-742.2-both_sexes	Pathological, developmental or recurrent dislocation	0.903599	0.333657	0.00760955	1.0222	0.585004	0.0827879	0.707279	0.536533	0.189576	141	TG	151.726	0.2854	100	413456
icd10-D05-both_sexes	D05 Carcinoma in situ of breast	0.190658	0.0704221	0.0076271	0.250669	0.123061	0.0435537	0.258081	0.102002	0.0125084	141	TG	164.684	0.098	2484	418047
categorical-20001-both_sexes-1034	Cancer code, self-reported	0.400165	0.147905	0.00766681	0.107432	0.257058	0.676644	0.322192	0.224933	0.154261	141	TG	164.344	0.101	555	419918
phecode-556-both_sexes	Ulceration of the lower GI tract	0.242661	0.0897561	0.00771042	0.166859	0.15688	0.28935	0.214687	0.135097	0.114286	141	TG	147.022	0.3752	1351	330270
phecode-173-both_sexes	Neoplasm of uncertain behavior of skin	-0.63145	0.233709	0.00774779	-0.9482	0.407706	0.0214818	-0.408282	0.369258	0.270761	141	TG	149.125	0.3345	200	402691
icd10-R40-both_sexes	R40 Somnolence, stupor and coma	-0.34983	0.129496	0.00775669	-0.0458877	0.224603	0.838413	-0.272345	0.166323	0.103784	141	TG	211.767	0.0001	933	419598
icd10-T42-both_sexes	T42 Poisoning by antiepileptic, sedative-hypnotic and anti-Parkinsonism drugs	-0.290517	0.107635	0.00780958	-0.381369	0.18831	0.044759	-0.447539	0.174562	0.0114086	141	TG	157.461	0.1849	1011	419520
phecode-772.1-both_sexes	Muscular wasting and disuse atrophy	-0.666539	0.247913	0.00804629	-0.521492	0.433766	0.231313	-0.597814	0.427926	0.164623	141	TG	115.413	0.9532	138	419537
phecode-798.1-both_sexes	Chronic fatigue syndrome	0.301837	0.112285	0.0080572	0.362611	0.196363	0.0669263	0.510308	0.186609	0.00705272	141	TG	125.78	0.8309	734	416233
phecode-622.1-females	Polyp of corpus uteri	0.0894018	0.0332885	0.00811388	0.0479997	0.0580807	0.409976	0.0512609	0.0492314	0.299567	141	TG	164.192	0.1017	11612	213800
icd10-I22-both_sexes	I22 Subsequent myocardial infarction	0.330739	0.123235	0.00815688	-0.0249586	0.212681	0.90675	0.277278	0.201062	0.170075	141	TG	155.917	0.2099	761	419770
phecode-416-both_sexes	Cardiomegaly	0.130625	0.048688	0.00817798	0.148836	0.0852224	0.0829422	0.207683	0.0886419	0.0205406	141	TG	115.992	0.9495	3704	411769
phecode-165.1-both_sexes	Cancer of bronchus; lung	-0.176943	0.0659974	0.00822081	-0.160496	0.115588	0.167201	-0.177283	0.0951105	0.0644197	141	TG	190.208	0.0047	3337	416654
icd10-K25-both_sexes	K25 Gastric ulcer	-0.137891	0.0514747	0.00827322	-0.109699	0.0900967	0.225451	-0.172277	0.0757279	0.0244287	141	TG	185.522	0.0096	5253	415278
phecode-386.3-both_sexes	Labyrinthitis	0.292248	0.109118	0.00828602	0.366814	0.190882	0.0566929	0.402955	0.167922	0.017726	141	TG	144.954	0.4171	900	412745
phecode-735.2-both_sexes	Acquired toe deformities	0.122007	0.0455564	0.00828875	0.170494	0.079569	0.0338778	0.103919	0.0713909	0.147731	141	TG	162.361	0.1203	6005	403527
phecode-807-both_sexes	Fracture of ribs	-0.31931	0.119252	0.00830192	-0.234427	0.208796	0.263476	-0.398004	0.206245	0.0556586	141	TG	130.897	0.7357	677	395047
phecode-276.8-both_sexes	Polydipsia	0.7466	0.279071	0.00835611	0.736915	0.488851	0.133966	0.465572	0.441935	0.293934	141	TG	159.512	0.1583	138	409482
phecode-301.2-both_sexes	Antisocial/borderline personality disorder	0.686327	0.256553	0.00835887	-0.186747	0.439811	0.671779	0.555737	0.407934	0.175285	141	TG	147.96	0.3558	164	369930
phecode-626.14-females	Irregular menstrual bleeding	0.144106	0.0538894	0.00838448	0.344092	0.091977	0.000267181	0.225261	0.0820333	0.00682577	141	TG	152.911	0.2605	4023	194287
phecode-427.11-both_sexes	Paroxysmal supraventricular tachycardia	0.162526	0.0608482	0.00845848	0.164861	0.10649	0.123865	-0.0112424	0.101529	0.911989	141	TG	145.405	0.4086	2895	384657
categorical-22133-both_sexes-22133	Doctor diagnosed sarcoidosis	-0.972692	0.365653	0.00872209	0.0940474	0.628434	0.881255	-0.327485	0.24241	0.17889	141	TG	814.511	0.0001	456	105785
phecode-650-females	Normal delivery	0.208253	0.0785182	0.00891778	0.396173	0.136043	0.00418362	0.185498	0.12056	0.126148	141	TG	162.003	0.1252	2041	225460
icd10-G03-both_sexes	G03 Meningitis due to other and unspecified causes	0.686209	0.25883	0.0089451	0.657132	0.452884	0.149035	0.642615	0.463592	0.1679	141	TG	112.602	0.9691	123	420408
phecode-455-both_sexes	Hemorrhoids	0.0586263	0.0221183	0.0089608	0.0401756	0.038674	0.300688	0.0276958	0.0329756	0.402404	141	TG	159.026	0.1657	26726	376206
icd10-O80-both_sexes	O80 Single spontaneous delivery	0.207888	0.0784809	0.00900338	0.395993	0.135974	0.00418155	0.187953	0.116736	0.109636	141	TG	162.578	0.1186	2041	418490
icd10-Z46-both_sexes	Z46 Fitting and adjustment of other devices	0.137919	0.0523161	0.00932862	0.0716732	0.0913001	0.433773	0.160982	0.0696695	0.0223136	141	TG	218.027	0.0001	6086	414445
phecode-788-both_sexes	Syncope and collapse	-0.0907141	0.0344427	0.00939424	-0.0500567	0.0601573	0.406782	-0.110151	0.0508462	0.0319776	141	TG	173.087	0.0415	11300	409231
icd10-D18-both_sexes	D18 Haemangioma and lymphangioma, any site	-0.228078	0.0868166	0.00957065	-0.525794	0.1488	0.000557085	-0.381844	0.131459	0.00427408	141	TG	185.76	0.0099	1820	418711
categorical-20002-both_sexes-1312	Non-cancer illness code, self-reported	-0.101913	0.0387985	0.00958142	-0.121532	0.0678618	0.0754895	-0.0720333	0.0618613	0.246229	141	TG	138.097	0.5718	7004	413469
icd10-D17-both_sexes	D17 Benign lipomatous neoplasm	0.131434	0.0500618	0.00961604	0.101723	0.0875614	0.247335	0.09243	0.0691394	0.183435	141	TG	238.541	0.0001	7232	413299
icd10-M93-both_sexes	M93 Other osteochondropathies	-0.469946	0.179033	0.00963016	-0.604917	0.312968	0.0552895	-0.25891	0.300139	0.389814	141	TG	136.626	0.6083	313	420218
phecode-471-both_sexes	Nasal polyps	-0.197512	0.0753541	0.00973266	-0.0164573	0.130646	0.899939	-0.183901	0.0945125	0.0536839	141	TG	271.036	0.0001	3666	398757
icd10-Z36-both_sexes	Z36 Antenatal screening	0.248795	0.0949317	0.00974186	0.209145	0.166204	0.210372	0.275537	0.153213	0.0742705	141	TG	153.714	0.2467	1293	419238
icd10-K59-both_sexes	K59 Other functional intestinal disorders	0.0727509	0.0278499	0.00997644	-0.000194162	0.0481739	0.99679	0.0318306	0.0447178	0.477766	141	TG	145.494	0.4058	14578	405953
icd10-Y56-both_sexes	Y56 Topical agents primarily affecting skin and mucous membrane and ophthalmological, otorhinolaryngological and dental drugs	-0.716311	0.274396	0.0100251	-0.610566	0.480369	0.205839	-0.9451	0.485651	0.0536523	141	TG	123.084	0.8711	116	420415
phecode-990-both_sexes	Effects radiation NOS	-0.128237	0.049171	0.0100957	-0.275918	0.084688	0.00141005	-0.0705302	0.078541	0.370725	141	TG	153.64	0.2476	4786	415744
phecode-283-both_sexes	Acquired hemolytic anemias	-0.620011	0.238168	0.0102295	0.0578265	0.411038	0.888323	-0.221498	0.361652	0.541226	141	TG	146.933	0.3778	191	396365
phecode-418-both_sexes	Nonspecific chest pain	0.0587635	0.0225986	0.0103131	0.00962363	0.0392395	0.806622	0.060453	0.0315709	0.0575533	141	TG	199.222	0.001	33293	384496
phecode-655-females	Known or suspected fetal abnormality affecting management of mother	-0.15453	0.0596186	0.0105546	-0.0477359	0.103733	0.646106	-0.127221	0.0883271	0.152004	141	TG	144.792	0.4201	3280	224221
categorical-20002-both_sexes-1295	Non-cancer illness code, self-reported	-0.159669	0.0617027	0.0106801	-0.0718242	0.107659	0.505787	-0.137655	0.11173	0.220004	141	TG	104.928	0.9927	2041	418432
icd10-I63-both_sexes	I63 Cerebral infarction	-0.137602	0.0531964	0.0107105	-0.00667349	0.0921482	0.942371	-0.0807077	0.0801071	0.315434	141	TG	160.031	0.151	4275	416256
phecode-253-both_sexes	Disorders of the pituitary gland and its hypothalamic control	-0.27219	0.105382	0.0108235	-0.231637	0.184446	0.211276	-0.313421	0.184707	0.0919456	141	TG	131.64	0.7183	869	415877
icd10-E88-both_sexes	E88 Other metabolic disorders	-0.388706	0.150637	0.0108974	0.0763716	0.25926	0.768758	-0.358095	0.246875	0.149152	141	TG	152.684	0.2668	494	420037
categorical-20002-both_sexes-1286	Non-cancer illness code, self-reported	0.0746588	0.0289421	0.0109225	-0.0394763	0.0492498	0.42418	0.010067	0.0354381	0.776775	141	TG	246.613	0.0001	24071	396402
icd10-H21-both_sexes	H21 Other disorders of iris and ciliary body	0.398274	0.154624	0.0110388	0.210502	0.269762	0.436527	0.238482	0.241279	0.324657	141	TG	141.839	0.4856	435	420096
phecode-574.12-both_sexes	Cholelithiasis with other cholecystitis	-0.146089	0.0567866	0.0111351	-0.231654	0.0989878	0.020695	-0.200026	0.0743483	0.00800533	141	TG	278.791	0.0001	6563	399542
categorical-3616-both_sexes-3616	Chest pain due to walking ceases when standing still	0.138514	0.0538981	0.0112176	0.183541	0.0941676	0.0532992	0.256278	0.0939442	0.00718919	141	TG	141.542	0.4928	19410	4494
icd10-M23-both_sexes	M23 Internal derangement of knee	-0.141009	0.0550666	0.0115055	-0.245593	0.0957674	0.0113948	-0.150438	0.0812992	0.0663609	141	TG	161.232	0.1354	3989	416542
icd10-Z12-both_sexes	Z12 Special screening examination for neoplasms	0.0910662	0.0355772	0.0115379	0.0385333	0.0620292	0.535478	0.0951454	0.057862	0.102348	141	TG	144.597	0.4247	8691	411840
phecode-798-both_sexes	Malaise and fatigue	-0.124183	0.0486077	0.0116933	-0.0113001	0.0842973	0.893557	-0.154816	0.0791649	0.0525017	141	TG	135.848	0.6269	4298	416233
categorical-22127-both_sexes-22127	Doctor diagnosed asthma	-0.123623	0.0485272	0.0119295	0.0278741	0.0833938	0.738697	-0.0143113	0.0523687	0.785041	141	TG	356.089	0.0001	13511	92730
phecode-627.4-females	Premenopausal menorrhagia	0.466731	0.183277	0.0119592	0.0373278	0.317582	0.906604	0.420407	0.272785	0.125534	141	TG	155.284	0.2206	338	194287
phecode-604.1-males	Redundant prepuce and phimosis/BXO	0.165662	0.065177	0.0121197	0.236878	0.113936	0.0394507	0.265719	0.0961596	0.00649141	141	TG	183.089	0.013	3267	169119
phecode-604-males	Disorders of penis	0.152925	0.0601909	0.0121543	0.158582	0.105434	0.134829	0.137944	0.0839402	0.102553	141	TG	188.553	0.0058	3963	169119
phecode-070.4-both_sexes	Chronic hepatitis	-0.715129	0.28173	0.0122317	-0.159086	0.489154	0.745498	-0.407602	0.29658	0.171533	141	TG	351.905	0.0001	329	413496
icd10-K64-both_sexes	K64 Haemorrhoids and perianal venous thrombosis	0.152691	0.0602196	0.0123248	0.117258	0.105319	0.267473	0.121907	0.0975814	0.213644	141	TG	147.688	0.3615	3031	417500
icd10-N08-both_sexes	N08 Glomerular disorders in diseases classified elsewhere	-0.49466	0.195205	0.0123758	-0.51213	0.341731	0.136236	-0.274876	0.250063	0.273555	141	TG	222.327	0.0001	430	420101
phecode-287.3-both_sexes	Thrombocytopenia	-0.220176	0.0869263	0.0124145	-0.178428	0.152106	0.242781	-0.202471	0.122549	0.100742	141	TG	210.328	0.0001	2056	416975
phecode-728.7-both_sexes	Fasciitis	-0.166023	0.0655893	0.0124707	-0.193459	0.114782	0.0941472	-0.198115	0.0847936	0.0208874	141	TG	261.451	0.0001	4771	386922
icd10-H60-both_sexes	H60 Otitis externa	0.321081	0.126903	0.0125092	0.252161	0.222011	0.257994	0.365963	0.218582	0.0963118	141	TG	134.723	0.6518	612	419919
phecode-563-both_sexes	Constipation	0.0696786	0.0275435	0.0125213	0.00175274	0.0477146	0.97075	0.0342179	0.0467727	0.465648	141	TG	133.683	0.6762	13839	330270
phecode-695.7-both_sexes	Prurigo and Lichen	-0.3521	0.139231	0.0125509	-0.0599679	0.24172	0.804432	-0.0701963	0.185041	0.704998	141	TG	242.916	0.0001	936	412638
icd10-G59-both_sexes	G59 Mononeuropathy in diseases classified elsewhere	-0.57332	0.22677	0.0125747	-1.7503	0.37846	8.49111e-06	-0.457907	0.352224	0.195722	141	TG	168.609	0.0689	241	420290
categorical-20002-both_sexes-1279	Non-cancer illness code, self-reported	0.316555	0.125331	0.012659	0.355492	0.219359	0.107371	0.355372	0.21442	0.099685	141	TG	123.824	0.8592	582	419891
phecode-580.31-both_sexes	Nephritis and nephropathy in diseases classified elsewhere	-0.494375	0.195858	0.0127138	-0.511202	0.342896	0.138271	-0.284597	0.26133	0.278012	141	TG	223.716	0.0001	430	401927
phecode-250.5-both_sexes	Glycosuria or Acetonuria	0.686143	0.271926	0.0127443	0.804477	0.475641	0.0930103	0.830681	0.466243	0.0769746	141	TG	136.613	0.6067	136	396181
phecode-531.2-both_sexes	Gastric ulcer	-0.128698	0.051027	0.0127827	-0.108066	0.0893461	0.228516	-0.148689	0.0781604	0.0591791	141	TG	184.719	0.0103	5323	411516
categorical-22130-both_sexes-22130	Doctor diagnosed COPD (chronic obstructive pulmonary disease)	-0.209972	0.0832971	0.0128316	-0.157964	0.145602	0.279841	-0.172652	0.137491	0.211305	141	TG	140.647	0.5127	1581	104660
phecode-395.6-both_sexes	Heart valve replaced	0.177429	0.0703994	0.0128468	-0.00175542	0.121827	0.988524	0.13489	0.112646	0.233151	141	TG	129.946	0.7512	1957	400902
phecode-426.31-both_sexes	Right bundle branch block	0.201668	0.0800448	0.0128775	-0.0219838	0.138114	0.873764	0.137215	0.11377	0.229822	141	TG	189.457	0.0051	2217	384657
categorical-6152-both_sexes-8	Blood clot, DVT, bronchitis, emphysema, asthma, rhinitis, eczema, allergy diagnosed by doctor	-0.114548	0.0455039	0.0129519	0.0327201	0.0781596	0.676132	-0.00320516	0.028496	0.910606	141	TG	1025.77	0.0001	48560	371208
phecode-770-both_sexes	Myalgia and myositis unspecified	-0.2541	0.101116	0.0131059	-0.369252	0.176615	0.0383738	-0.34516	0.170897	0.0453237	141	TG	133.135	0.6868	959	419572
phecode-793-both_sexes	Nonspecific abnormal findings on radiological and other examination of musculoskeletal system	-0.643683	0.256365	0.0131826	-0.179456	0.446455	0.688333	-0.725958	0.397646	0.0700362	141	TG	161.236	0.1352	181	419608
icd10-L43-both_sexes	L43 Lichen planus	-0.366366	0.145991	0.013229	-0.235394	0.255021	0.357588	-0.197272	0.217799	0.366622	141	TG	191.701	0.0037	661	419870
phecode-728-both_sexes	Disorders of muscle, ligament, and fascia	-0.178361	0.0711687	0.0133491	-0.120984	0.124452	0.332673	-0.139484	0.0907959	0.126738	141	TG	282.743	0.0001	4399	386922
phecode-300.1-both_sexes	Anxiety disorder	0.1027	0.0409829	0.0133577	0.00113594	0.0709506	0.987249	0.088185	0.056839	0.123042	141	TG	211.034	0.0001	9705	369930
icd10-F10-both_sexes	F10 Mental and behavioural disorders due to use of alcohol	-0.110116	0.0440894	0.0136633	-0.132781	0.0772399	0.0878271	-0.0971669	0.0694002	0.163697	141	TG	157.619	0.1836	6262	414269
icd10-C34-both_sexes	C34 Malignant neoplasm of bronchus and lung	-0.168163	0.0673629	0.0137068	-0.187947	0.117983	0.113433	-0.207763	0.101989	0.0435238	141	TG	181.108	0.0147	3048	417483
phecode-165-both_sexes	Cancer within the respiratory system	-0.15955	0.064034	0.0138825	-0.161678	0.112162	0.151701	-0.205489	0.088408	0.0215469	141	TG	204.875	0.0002	3837	416654
phecode-442.11-both_sexes	Abdominal aortic aneurysm	0.255122	0.10249	0.0139724	0.327684	0.179155	0.069535	0.376432	0.155076	0.0164776	141	TG	180.823	0.0162	1306	408565
categorical-20002-both_sexes-1163	Non-cancer illness code, self-reported	-0.371322	0.149391	0.0141114	-0.746412	0.258617	0.00452276	-0.499778	0.254957	0.051953	141	TG	127.014	0.8108	420	420053
categorical-20002-both_sexes-1117	Non-cancer illness code, self-reported	0.314996	0.126756	0.014131	0.302812	0.221928	0.174628	0.279542	0.203521	0.171783	141	TG	156.848	0.1948	719	419754
phecode-481-both_sexes	Influenza	0.444778	0.179057	0.0141709	0.0663297	0.311332	0.831599	0.268957	0.264454	0.310895	141	TG	181.071	0.0161	414	405999
icd10-I42-both_sexes	I42 Cardiomyopathy	0.190896	0.0768568	0.0141792	0.178323	0.1345	0.187073	0.164822	0.129473	0.205119	141	TG	131.387	0.7226	1662	418869
icd10-V03-both_sexes	V03 Pedestrian injured in collision with car, pick-up truck or van	0.353798	0.142714	0.0143599	0.335049	0.249891	0.182179	0.335399	0.2592	0.197803	141	TG	115.501	0.9534	417	420114
phecode-425.1-both_sexes	Primary/intrinsic cardiomyopathies	0.18988	0.0766065	0.0143764	0.179114	0.13407	0.183741	0.168504	0.129115	0.194012	141	TG	130.735	0.7356	1665	416313
phecode-626.12-females	Excessive or frequent menstruation	0.0973338	0.0393017	0.014456	-0.0404511	0.067328	0.548948	0.0791973	0.0558902	0.1587	141	TG	193.762	0.0028	10309	194287
icd10-N05-both_sexes	N05 Unspecified nephritic syndrome	-0.519106	0.209684	0.014492	-0.345616	0.36671	0.347584	-0.641146	0.316609	0.0447643	141	TG	188.986	0.0059	317	420214
phecode-958.2-both_sexes	Traumatic and surgical subcutaneous emphysema	-0.676739	0.273524	0.0145505	-0.354123	0.477862	0.459909	-0.516831	0.463661	0.2669	141	TG	109.894	0.9804	108	419882
categorical-20002-both_sexes-1294	Non-cancer illness code, self-reported	0.0947764	0.0384569	0.0149319	0.0931023	0.0673071	0.168807	0.149085	0.0656209	0.0246156	141	TG	146.558	0.3856	7444	413029
icd10-D59-both_sexes	D59 Acquired haemolytic anaemia	-0.589912	0.239655	0.0150509	0.0368983	0.414431	0.929183	-0.145647	0.365489	0.690869	141	TG	146.34	0.3878	187	420344
categorical-20002-both_sexes-1079	Non-cancer illness code, self-reported	0.421051	0.171374	0.0152365	0.491363	0.300065	0.103784	0.76115	0.287008	0.00892445	141	TG	138.74	0.5596	346	420127
icd10-J06-both_sexes	J06 Acute upper respiratory infections of multiple and unspecified sites	0.252053	0.102638	0.0152841	-0.108613	0.175784	0.537666	0.00661899	0.156926	0.966416	141	TG	141.829	0.4864	996	419535
phecode-300-both_sexes	Anxiety disorders	0.0974694	0.0398856	0.0157805	-0.0262013	0.068621	0.703173	0.0559899	0.0538776	0.300501	141	TG	214.186	0.0001	10449	369930
phecode-695.42-both_sexes	Systemic lupus erythematosus	-0.721603	0.295375	0.0158106	0.362323	0.504216	0.473602	-0.151906	0.267827	0.5715	141	TG	485.565	0.0001	412	411160
icd10-K57-both_sexes	K57 Diverticular disease of intestine	0.0608453	0.0249125	0.0158378	0.0538724	0.0436069	0.218762	0.0327263	0.0307394	0.288873	141	TG	244.974	0.0001	35617	384914
phecode-153-both_sexes	Colorectal cancer	-0.116682	0.0478019	0.0158973	-0.140266	0.0836594	0.0958622	-0.102756	0.0723845	0.157952	141	TG	169.344	0.0642	5693	386740
phecode-622-females	Polyp of female genital organs	0.0803066	0.0329017	0.0159033	0.0418342	0.0574328	0.467593	0.0376089	0.0507807	0.460168	141	TG	164.052	0.103	11884	213800
icd10-Q05-both_sexes	Q05 Spina bifida	0.532946	0.218557	0.0160017	0.0884251	0.379581	0.81614	0.510431	0.403343	0.207794	141	TG	111.418	0.9748	170	420361
categorical-20002-both_sexes-1549	Non-cancer illness code, self-reported	-0.715942	0.293774	0.0160625	-0.656062	0.513784	0.203759	-0.605881	0.395796	0.128077	141	TG	192.691	0.0032	164	420309
categorical-20002-both_sexes-1111	Non-cancer illness code, self-reported	-0.110412	0.045361	0.0161892	0.0398218	0.0778467	0.609784	0.0153491	0.0284752	0.590719	141	TG	1038.1	0.0001	48865	371608
phecode-253.2-both_sexes	Pituitary hypofunction	-0.439266	0.180542	0.016234	-0.668798	0.31533	0.0357014	-0.318035	0.299227	0.289678	141	TG	144.667	0.4219	326	415877
icd10-K52-both_sexes	K52 Other non-infective gastro-enteritis and colitis	0.0771645	0.0317467	0.0163378	0.0394941	0.0554397	0.477424	0.0789864	0.0416192	0.0597763	141	TG	227.109	0.0001	17801	402730
phecode-728.71-both_sexes	Contracture of palmar fascia [Dupuytren's disease]	-0.182439	0.0750628	0.0163444	-0.13252	0.131295	0.314571	-0.201748	0.0951813	0.0358033	141	TG	302.879	0.0001	4233	386922
phecode-578.9-both_sexes	Hemorrhage of gastrointestinal tract	0.0956479	0.0394144	0.0165074	0.0752881	0.068945	0.276721	0.13773	0.0647085	0.0350494	141	TG	155.07	0.2249	7468	390772
phecode-335-both_sexes	Multiple sclerosis	-0.355541	0.146694	0.0166405	0.157927	0.251102	0.530424	-0.0642017	0.141499	0.65073	141	TG	442.677	0.0001	1538	403249
icd10-L91-both_sexes	L91 Hypertrophic disorders of skin	0.210944	0.0870367	0.0166432	-0.00454329	0.15075	0.976	0.137266	0.145913	0.348457	141	TG	123.546	0.8635	1216	419315
icd10-N64-both_sexes	N64 Other disorders of breast	0.203063	0.0839021	0.0167925	0.119958	0.146631	0.414704	0.152048	0.139584	0.277896	141	TG	130.192	0.7464	1368	419163
categorical-20002-both_sexes-1225	Non-cancer illness code, self-reported	-0.598999	0.247911	0.0169729	0.0343374	0.428042	0.936178	-0.0256938	0.0929888	0.782717	141	TG	2581.65	0.0001	3197	417276
icd10-N31-both_sexes	N31 Neuromuscular dysfunction of bladder, not elsewhere classified	-0.18184	0.0753271	0.0170706	-0.17331	0.131996	0.191351	-0.109533	0.118379	0.356418	141	TG	132.931	0.6898	1754	418777
categorical-20002-both_sexes-1377	Non-cancer illness code, self-reported	0.345124	0.143174	0.0172278	0.689206	0.248019	0.00621038	0.406131	0.198989	0.0431321	141	TG	246.721	0.0001	885	419588
phecode-617-females	Disorders secondary to childbirth, surgery, trauma	0.425478	0.176765	0.0173865	0.663195	0.308349	0.0332218	0.395627	0.288859	0.172999	141	TG	145.974	0.3965	345	213696
categorical-20002-both_sexes-1112	Non-cancer illness code, self-reported	-0.210805	0.0876642	0.0174939	-0.0549648	0.152696	0.719422	-0.193409	0.132593	0.146897	141	TG	156.077	0.2077	1506	418967
phecode-571.51-both_sexes	Cirrhosis of liver without mention of alcohol	-0.554078	0.230751	0.0176545	-0.883385	0.402855	0.0299843	-0.512607	0.39393	0.195306	141	TG	109.324	0.9826	151	408402
categorical-20002-both_sexes-1439	Non-cancer illness code, self-reported	0.447916	0.186618	0.017702	-0.162497	0.320617	0.61308	0.378851	0.280522	0.179027	141	TG	140.964	0.5056	300	420173
phecode-287.1-both_sexes	Spontaneous ecchymoses	-0.712028	0.296676	0.0177092	0.246823	0.509589	0.628895	-0.185583	0.414159	0.654776	141	TG	187.514	0.008	157	416975
icd10-M32-both_sexes	M32 Systemic lupus erythematosus	-0.702789	0.292884	0.0177313	0.35757	0.5003	0.475986	-0.0977259	0.271307	0.719237	141	TG	477.577	0.0001	411	420120
icd10-C32-both_sexes	C32 Malignant neoplasm of larynx	-0.45943	0.191644	0.0178354	-0.211592	0.334877	0.528523	-0.688382	0.299381	0.0229644	141	TG	139.791	0.5331	281	420250
phecode-038.2-both_sexes	Gram positive septicemia	0.35112	0.146498	0.0178611	0.405348	0.256357	0.116109	0.426314	0.217174	0.0516272	141	TG	181.643	0.0149	624	401597
phecode-602-males	Other disorders of prostate	0.283192	0.118374	0.0180681	-0.017519	0.204752	0.931938	0.140722	0.134907	0.2987	141	TG	299.359	0.0001	1606	169762
phecode-457-both_sexes	Encounter for long-term (current) use of anticoagulants, antithrombotics, aspirin	0.75713	0.316557	0.0180961	0.116779	0.553645	0.833252	0.882977	0.532014	0.0992157	141	TG	142.231	0.4763	102	376206
phecode-276.6-both_sexes	Fluid overload	-0.257247	0.107783	0.0183366	-0.161096	0.18844	0.39408	-0.136329	0.180102	0.45035	141	TG	125.123	0.8401	793	409482
icd10-N42-both_sexes	N42 Other disorders of prostate	0.277991	0.116509	0.0183702	-0.0131267	0.201612	0.948181	0.157093	0.136775	0.252699	141	TG	289.543	0.0001	1602	418929
phecode-513.3-both_sexes	Hypoventilation	0.673994	0.282935	0.0185559	0.723086	0.495537	0.146767	0.901398	0.464422	0.0542793	141	TG	139.283	0.5468	128	408978
icd10-B00-both_sexes	B00 Herpesviral [herpes simplex] infections	-0.422361	0.177881	0.0189342	-0.071389	0.30943	0.817878	-0.190146	0.277021	0.493598	141	TG	152.216	0.2746	355	420176
icd10-J32-both_sexes	J32 Chronic sinusitis	-0.160847	0.0677748	0.0189902	-0.0186827	0.11771	0.874121	-0.151264	0.101374	0.137914	141	TG	174.827	0.0347	2845	417686
phecode-287-both_sexes	Purpura and other hemorrhagic conditions	-0.198321	0.0835961	0.0190345	-0.135798	0.146194	0.354555	-0.139883	0.115277	0.227	141	TG	210.524	0.0001	2227	416975
icd10-T88-both_sexes	T88 Other complications of surgical and medical care, not elsewhere classified	0.261969	0.110442	0.0190528	0.222948	0.193234	0.250573	0.234794	0.17042	0.170484	141	TG	149.809	0.3213	906	419625
phecode-535.9-both_sexes	Gastritis and duodenitis, NOS	0.657848	0.277919	0.0192993	0.289773	0.488251	0.553816	0.243582	0.466514	0.602403	141	TG	130.1	0.7485	123	379860
icd10-I70-both_sexes	I70 Atherosclerosis	0.275182	0.116466	0.0195146	0.571432	0.201675	0.00529127	0.28061	0.176136	0.113383	141	TG	170.012	0.0586	933	419598
phecode-759.1-both_sexes	Anomalies of endocrine glands, congenital	0.660148	0.279678	0.0196355	1.1388	0.487234	0.0208521	0.758312	0.499249	0.131041	141	TG	122.339	0.8829	115	419140
phecode-185-males	Cancer of prostate	0.145302	0.0615657	0.0196494	-0.0500253	0.105797	0.637066	0.0577763	0.0657892	0.381338	141	TG	355.191	0.0001	7691	169762
phecode-596.5-both_sexes	Functional disorders of bladder	-0.176608	0.0748337	0.0196549	-0.180099	0.131143	0.17187	-0.101404	0.123537	0.413132	141	TG	132.355	0.703	1770	403310
icd10-D09-both_sexes	D09 Carcinoma in situ of other and unspecified sites	0.46038	0.195442	0.0198814	0.614547	0.3416	0.074184	0.377328	0.309835	0.225335	141	TG	146.766	0.3797	284	420247
phecode-300.11-both_sexes	Generalized anxiety disorder	0.536574	0.227925	0.0199539	0.659486	0.398435	0.100142	0.347271	0.38356	0.366816	141	TG	131.82	0.7129	186	369930
phecode-368.4-both_sexes	Visual field defects	-0.378138	0.160858	0.0201309	-0.372611	0.281496	0.187782	-0.239724	0.264925	0.367086	141	TG	156.972	0.1919	445	416168
phecode-277-both_sexes	Other disorders of metabolism	-0.234165	0.0996663	0.0201967	-0.0830757	0.173784	0.633373	-0.208678	0.169079	0.219195	141	TG	136.92	0.6003	1015	418882
phecode-201-both_sexes	Hodgkin's disease	-0.46739	0.199472	0.0205303	-0.165943	0.347867	0.63409	-0.661562	0.293926	0.0259582	141	TG	171.422	0.0517	317	414840
icd10-K60-both_sexes	K60 Fissure and fistula of anal and rectal regions	-0.152975	0.0653273	0.0206084	-0.149396	0.114374	0.193639	-0.121257	0.0840842	0.151511	141	TG	199.886	0.0009	3508	417023
icd10-K10-both_sexes	K10 Other diseases of jaws	-0.318518	0.136048	0.0206317	-0.557186	0.23695	0.0201028	-0.340809	0.238805	0.155766	141	TG	104.284	0.9934	415	420116
icd10-V80-both_sexes	V80 Animal-rider or occupant of animal-drawn vehicle injured in transport accident	0.432742	0.185004	0.0207449	0.445057	0.32352	0.171136	0.410814	0.275891	0.138725	141	TG	177.699	0.0236	383	420148
icd10-H05-both_sexes	H05 Disorders of orbit	-0.43527	0.186169	0.0208013	0.0867051	0.32138	0.787722	0.0991991	0.290672	0.733409	141	TG	160.825	0.141	339	420192
icd10-H90-both_sexes	H90 Conductive and sensorineural hearing loss	-0.25027	0.107158	0.0209366	-0.0285708	0.186146	0.878238	-0.0399562	0.140809	0.777012	141	TG	193.485	0.0029	1244	419287
categorical-20002-both_sexes-1121	Non-cancer illness code, self-reported	0.668648	0.286327	0.0209508	0.859106	0.501534	0.0889503	0.472921	0.496265	0.342253	141	TG	119.013	0.9232	107	420366
phecode-735.3-both_sexes	Hallux valgus (Bunion)	0.130878	0.0560826	0.0210366	0.0596449	0.0978765	0.543261	0.0637128	0.066079	0.336612	141	TG	304.613	0.0001	7656	403527
phecode-971-both_sexes	Poisoning by drugs primarily affecting the autonomic nervous system	-0.296943	0.127345	0.0211372	-0.362707	0.222915	0.10598	-0.500826	0.208949	0.0178555	141	TG	143.544	0.4472	654	383239
phecode-353.1-both_sexes	Nerve plexus lesions	-0.613969	0.263368	0.0211692	-0.634158	0.461528	0.171641	-0.295166	0.432159	0.495733	141	TG	130.841	0.7358	139	399339
phecode-562.1-both_sexes	Diverticulosis	0.0579627	0.0248687	0.0211949	0.0582923	0.0435384	0.182798	0.0465645	0.0315683	0.142447	141	TG	237.209	0.0001	35617	330270
phecode-275-both_sexes	Disorders of mineral metabolism	-0.156488	0.0671557	0.0212235	-0.11163	0.11753	0.343864	-0.0500004	0.0965604	0.605405	141	TG	186.473	0.0091	3103	417428
icd10-K13-both_sexes	K13 Other diseases of lip and oral mucosa	0.117026	0.0502245	0.0212322	0.150214	0.0878174	0.0893991	0.120546	0.0861617	0.164003	141	TG	116.337	0.9464	3439	417092
phecode-818-both_sexes	Intracranial hemorrhage (injury)	0.284851	0.12238	0.0213673	0.146392	0.213821	0.494707	0.204868	0.182417	0.263328	141	TG	159.673	0.1553	790	415565
icd10-E83-both_sexes	E83 Disorders of mineral metabolism	-0.156751	0.0673519	0.0213806	-0.106988	0.11785	0.365542	-0.0507647	0.100828	0.61542	141	TG	186.996	0.0081	3092	417439
icd10-E89-both_sexes	E89 Postprocedural endocrine and metabolic disorders, not elsewhere classified	-0.27125	0.116756	0.0216075	-0.142005	0.203828	0.487162	-0.211915	0.134678	0.11786	141	TG	302.397	0.0001	1660	418871
icd10-C81-both_sexes	C81 Hodgkin's disease	-0.473449	0.203857	0.02165	-0.174453	0.355483	0.624377	-0.563964	0.311422	0.0722957	141	TG	170.781	0.0559	302	420229
icd10-I85-both_sexes	I85 Oesophageal varices	-0.326447	0.140567	0.0216557	-0.0673605	0.244871	0.783659	-0.00364393	0.214381	0.986463	141	TG	174.796	0.034	649	419882
icd10-N82-both_sexes	N82 Fistulae involving female genital tract	0.499224	0.215041	0.0217017	0.634436	0.376026	0.0938058	0.399766	0.367167	0.278119	141	TG	131.123	0.7286	207	420324
icd10-J45-both_sexes	J45 Asthma	-0.102273	0.0442024	0.0221386	-0.00821737	0.0767354	0.914874	-0.0413093	0.0330955	0.214047	141	TG	687.275	0.0001	31030	389501
phecode-562-both_sexes	Diverticulosis and diverticulitis	0.0573804	0.0248098	0.0221904	0.0583117	0.0434344	0.181614	0.0470254	0.0312047	0.134064	141	TG	236.544	0.0001	35659	330270
icd10-S66-both_sexes	S66 Injury of muscle and tendon at wrist and hand level	0.198604	0.0859364	0.0222904	0.0800893	0.149927	0.594063	0.137233	0.139496	0.326921	141	TG	139.736	0.5356	1395	419136
phecode-1013-both_sexes	Asphyxia and hypoxemia	-0.384825	0.166702	0.0224379	-0.279939	0.291567	0.338663	-0.0889044	0.273444	0.745569	141	TG	127.242	0.8065	337	420194
phecode-874-both_sexes	Complication of amputation stump	0.499003	0.216197	0.0224595	0.249705	0.377527	0.509436	0.429188	0.35714	0.231495	141	TG	132.015	0.7107	207	400468
categorical-20002-both_sexes-1197	Non-cancer illness code, self-reported	0.17998	0.0779784	0.0224602	0.0443649	0.135734	0.744272	0.0919849	0.105443	0.384504	141	TG	263.444	0.0001	3253	417220
icd10-D69-both_sexes	D69 Purpura and other haemorrhagic conditions	-0.192849	0.0836643	0.0226351	-0.129487	0.146298	0.377636	-0.124272	0.115988	0.285821	141	TG	208.235	0.0001	2199	418332
phecode-555.21-both_sexes	Ulcerative colitis (chronic)	-0.300094	0.130205	0.0226495	-0.302774	0.227879	0.186137	-0.189299	0.212053	0.373552	141	TG	153.612	0.2501	664	330270
phecode-580.32-both_sexes	Nephritis and nephropathy with pathological lesion	-0.432352	0.187875	0.0228525	-0.397037	0.328925	0.229454	-0.668458	0.281276	0.0188302	141	TG	182.04	0.0138	379	401927
icd10-K85-both_sexes	K85 Acute pancreatitis	-0.162437	0.0706568	0.0229878	-0.444451	0.12021	0.000312781	-0.214437	0.113111	0.0600469	141	TG	158.869	0.1657	2366	418165
phecode-872-both_sexes	Traumatic amputation	-0.276413	0.120246	0.0230008	-0.155719	0.210654	0.461022	-0.222163	0.176471	0.210155	141	TG	181.747	0.0141	937	400468
icd10-H47-both_sexes	H47 Other disorders of optic [2nd] nerve and visual pathways	0.337117	0.147119	0.0234292	0.645807	0.25545	0.0125859	0.368399	0.260306	0.159215	141	TG	123.062	0.8716	417	420114
phecode-571.5-both_sexes	Other chronic nonalcoholic liver disease	0.246382	0.1076	0.0235282	0.185848	0.188367	0.32554	0.452618	0.124331	0.000382142	141	TG	377.546	0.0001	2429	408402
categorical-20002-both_sexes-1652	Non-cancer illness code, self-reported	-0.340951	0.148905	0.0235327	0.167657	0.255044	0.512033	-0.0428377	0.240346	0.858797	141	TG	151.808	0.2833	499	419974
icd10-A63-both_sexes	A63 Other predominantly sexually transmitted diseases, not elsewhere classified	-0.548122	0.240798	0.024347	0.522117	0.406517	0.20115	-0.180586	0.351267	0.607993	141	TG	172.333	0.0454	218	420313
phecode-561.2-both_sexes	Flatulence	0.166599	0.0733089	0.0245759	0.0281702	0.127518	0.825486	0.122961	0.120206	0.30811	141	TG	158.251	0.175	2169	330270
phecode-495-both_sexes	Asthma	-0.102887	0.0452753	0.0245814	-0.00177737	0.0785321	0.981976	-0.0370884	0.03371	0.273124	141	TG	710.958	0.0001	31169	379656
icd10-M72-both_sexes	M72 Fibroblastic disorders	-0.167251	0.0737078	0.0247908	-0.0824316	0.12872	0.52297	-0.243558	0.0958574	0.0121489	141	TG	241.707	0.0001	3450	417081
icd10-S60-both_sexes	S60 Superficial injury of wrist and hand	-0.302347	0.133361	0.0249137	-0.138428	0.232836	0.553124	-0.216959	0.22084	0.327585	141	TG	132.818	0.6934	550	419981
phecode-158-both_sexes	Neoplasm of unspecified nature of digestive system	0.19607	0.0865919	0.025092	0.0633566	0.150945	0.675329	0.157412	0.137485	0.254188	141	TG	135.531	0.6306	1338	400294
phecode-443.9-both_sexes	Peripheral vascular disease, unspecified	0.168617	0.0745956	0.0253383	0.289176	0.130088	0.0278363	0.196769	0.0927768	0.0356938	141	TG	238.338	0.0001	3325	408565
categorical-20002-both_sexes-1238	Non-cancer illness code, self-reported	-0.38684	0.171192	0.0253851	-0.247128	0.299166	0.410187	-0.368742	0.315175	0.244005	141	TG	109.831	0.9804	274	420199
icd10-N93-both_sexes	N93 Other abnormal uterine and vaginal bleeding	0.122368	0.0541587	0.0254008	0.138316	0.0947659	0.146669	0.130906	0.0804572	0.105981	141	TG	170.801	0.0549	4409	416122
categorical-20002-both_sexes-1487	Non-cancer illness code, self-reported	0.471657	0.208971	0.0255534	0.360541	0.365293	0.325362	0.760475	0.360626	0.0367461	141	TG	119.812	0.9152	201	420272
phecode-452-both_sexes	Other venous embolism and thrombosis	-0.270272	0.119819	0.0256423	-0.119562	0.209151	0.568481	-0.418141	0.19052	0.0298311	141	TG	142.468	0.4714	730	376206
icd10-D23-both_sexes	D23 Other benign neoplasms of skin	-0.125869	0.0558806	0.0258492	-0.266557	0.0967283	0.00664152	-0.18536	0.0816709	0.02476	141	TG	190.927	0.0039	4596	415935
phecode-496.1-both_sexes	Emphysema	-0.161456	0.0716884	0.0258662	-0.00648362	0.124496	0.958541	-0.00649292	0.109712	0.952892	141	TG	158.707	0.1677	2425	379656
icd10-M14-both_sexes	M14 Arthropathies in other diseases classified elsewhere	0.554596	0.246341	0.0259222	0.552526	0.431079	0.202072	0.657898	0.465078	0.159407	141	TG	104.001	0.9938	124	420407
phecode-306-both_sexes	Other mental disorder	0.0486293	0.0216368	0.0261705	0.0278016	0.0378115	0.463415	0.0436311	0.0317304	0.17131	141	TG	205.134	0.0002	39711	369930
phecode-327-both_sexes	Sleep disorders	0.102899	0.0458486	0.0263807	0.111449	0.0802596	0.167174	0.137598	0.0669447	0.0416993	141	TG	180.515	0.0164	6623	413908
phecode-379.5-both_sexes	Disorders of iris and ciliary body	0.333076	0.148641	0.0266124	0.162887	0.259494	0.531223	0.40318	0.237069	0.0912228	141	TG	147.772	0.3594	495	410363
categorical-20002-both_sexes-1513	Non-cancer illness code, self-reported	0.191488	0.0854707	0.0266407	0.306153	0.14892	0.0416708	0.228148	0.126546	0.0735561	141	TG	167.588	0.0752	1710	418763
categorical-20002-both_sexes-1495	Non-cancer illness code, self-reported	-0.487871	0.218016	0.0268152	0.294488	0.372576	0.430635	-0.483973	0.348324	0.166908	141	TG	127.805	0.797	198	420275
phecode-649-females	Other conditions or status of the mother complicating pregnancy, childbirth, or the puerperium	0.599118	0.268533	0.0272663	0.547069	0.469694	0.246121	0.67335	0.457992	0.143745	141	TG	118.166	0.9295	121	227185
icd10-J43-both_sexes	J43 Emphysema	-0.158782	0.0712686	0.0274801	-0.0180004	0.123959	0.884753	0.00144016	0.10644	0.989224	141	TG	158.043	0.1762	2421	418110
phecode-618.2-females	Uterine/Uterovaginal prolapse	0.12494	0.0560839	0.0274945	0.0328417	0.0976838	0.737224	0.0854453	0.0704364	0.227141	141	TG	247.383	0.0001	6152	213696
phecode-686.4-both_sexes	Pyogenic granuloma	0.335043	0.150548	0.0276472	0.273092	0.263455	0.301732	0.349497	0.259713	0.180574	141	TG	129.238	0.7656	419	406937
icd10-D03-both_sexes	D03 Melanoma in situ	0.227841	0.102447	0.0277517	0.194119	0.179188	0.28054	0.188377	0.165236	0.256214	141	TG	134.167	0.664	956	419575
phecode-527.8-both_sexes	Other specified diseases of the salivary glands	-0.53469	0.24091	0.0280646	-0.246673	0.420742	0.558638	-0.278629	0.424687	0.512849	141	TG	121.173	0.8983	153	413830
phecode-279-both_sexes	Disorders involving the immune mechanism	-0.449557	0.202722	0.0281939	-0.116121	0.352985	0.742674	-0.242306	0.28701	0.399975	141	TG	183.955	0.011	328	419926
phecode-283.1-both_sexes	Autoimmune hemolytic anemias	-0.58875	0.265662	0.0282946	-0.0280297	0.461479	0.951654	-0.46004	0.447089	0.305269	141	TG	128.691	0.7781	134	396365
phecode-669-females	Complications of labor and delivery NEC	-0.131927	0.0596007	0.0284803	0.00705234	0.103328	0.945683	-0.0854737	0.105692	0.420057	141	TG	119.445	0.9186	2697	219193
categorical-20002-both_sexes-1637	Non-cancer illness code, self-reported	-0.246066	0.111191	0.0285164	-0.399697	0.193796	0.0410253	-0.275795	0.168034	0.10298	141	TG	160.967	0.1381	961	419512
icd10-F60-both_sexes	F60 Specific personality disorders	0.371899	0.168579	0.0290079	0.0454184	0.293324	0.877172	0.389765	0.276764	0.161262	141	TG	151.311	0.2939	390	420141
icd10-D15-both_sexes	D15 Benign neoplasm of other and unspecified intrathoracic organs	0.770926	0.349701	0.0291197	0.758055	0.611925	0.217506	0.779709	0.529589	0.143187	141	TG	166.197	0.0857	100	420431
phecode-153.3-both_sexes	Malignant neoplasm of rectum, rectosigmoid junction, and anus	-0.147431	0.0669289	0.0292439	-0.230461	0.116862	0.0505853	-0.105772	0.104263	0.312105	141	TG	160.92	0.1384	2705	386740
icd10-O02-both_sexes	O02 Other abnormal products of conception	-0.19318	0.0876981	0.0292454	-0.253516	0.15339	0.100637	-0.191462	0.15159	0.208678	141	TG	131.664	0.7188	1281	419250
icd10-M46-both_sexes	M46 Other inflammatory spondylopathies	-0.265874	0.120772	0.0293415	0.0166301	0.209292	0.936782	-0.404527	0.211992	0.0584096	141	TG	119.898	0.9119	602	419929
icd10-G47-both_sexes	G47 Sleep disorders	0.101786	0.0462471	0.0293812	0.109869	0.0809586	0.176949	0.116633	0.0649731	0.0747965	141	TG	181.799	0.0145	6557	413974
icd10-C22-both_sexes	C22 Malignant neoplasm of liver and intrahepatic bile ducts	-0.315952	0.143595	0.0294256	-0.442931	0.251042	0.0798665	-0.272155	0.234077	0.24694	141	TG	151.211	0.2947	539	419992
phecode-586-both_sexes	Other disorders of the kidney and ureters	0.122246	0.0555676	0.0294502	0.152966	0.0972184	0.117894	0.0677868	0.0808934	0.403472	141	TG	177.449	0.0241	4354	401927
icd10-H83-both_sexes	H83 Other diseases of inner ear	0.230739	0.104889	0.0294577	0.314713	0.1834	0.0883917	0.374052	0.163046	0.0232697	141	TG	141.698	0.4878	951	419580
phecode-425-both_sexes	Cardiomyopathy	0.168839	0.0767572	0.0294726	0.181369	0.134331	0.179159	0.129528	0.12834	0.314593	141	TG	133.169	0.6891	1689	416313
icd10-M48-both_sexes	M48 Other spondylopathies	0.29045	0.132114	0.0295572	0.348639	0.231168	0.133783	0.154662	0.16996	0.36439	141	TG	238.594	0.0001	1017	419514
categorical-20002-both_sexes-1599	Non-cancer illness code, self-reported	0.424487	0.19335	0.02978	0.200419	0.337331	0.55339	0.20242	0.297736	0.497713	141	TG	160.013	0.1516	314	420159
phecode-596.1-both_sexes	Bladder neck obstruction	0.172549	0.0787105	0.0300173	-0.0191134	0.136364	0.888732	0.0131825	0.111257	0.905852	141	TG	182.519	0.0129	2223	403310
phecode-441-both_sexes	Vascular insufficiency of intestine	0.184344	0.084095	0.030025	0.217575	0.147204	0.141657	0.27136	0.135734	0.0475222	141	TG	135.971	0.6209	1435	408565
icd10-Q76-both_sexes	Q76 Congenital malformations of spine and bony thorax	-0.545863	0.249184	0.0301356	0.313788	0.4268	0.463449	-0.243485	0.391469	0.534967	141	TG	138.49	0.5627	164	420367
categorical-20002-both_sexes-1500	Non-cancer illness code, self-reported	0.338716	0.154855	0.0303795	0.0998086	0.269685	0.711876	0.116071	0.233298	0.619601	141	TG	156.215	0.2024	480	419993
categorical-20002-both_sexes-1311	Non-cancer illness code, self-reported	-0.11121	0.0508458	0.030388	-0.0765729	0.0889566	0.390837	-0.173407	0.0884575	0.0519411	141	TG	128.766	0.7765	3720	416753
categorical-20002-both_sexes-1569	Non-cancer illness code, self-reported	-0.261978	0.119885	0.0305337	-0.0999001	0.208823	0.63312	-0.138363	0.181987	0.44836	141	TG	173.766	0.0387	889	419584
icd10-B35-both_sexes	B35 Dermatophytosis	-0.420054	0.192316	0.0306136	-0.340948	0.336407	0.312583	0.0717464	0.295854	0.808743	141	TG	154.909	0.2255	309	420222
phecode-362-both_sexes	Other retinal disorders	-0.119421	0.0546846	0.030641	-0.137669	0.0956892	0.15248	-0.0121171	0.0653752	0.853226	141	TG	260.36	0.0001	6603	404535
phecode-344-both_sexes	Other paralytic syndromes	-0.19382	0.0888205	0.0307661	-0.531432	0.151565	0.000612196	-0.303393	0.163797	0.0660964	141	TG	89.0701	0.9997	834	403249
phecode-550-both_sexes	Abdominal hernia	0.0559262	0.0256607	0.0309709	-0.0166556	0.0442834	0.707405	0.00888504	0.025153	0.72444	141	TG	394.693	0.0001	56668	363863
phecode-572-both_sexes	Ascites (non malignant)	-0.177248	0.0817736	0.0318846	-0.144538	0.143115	0.314276	-0.149353	0.117823	0.207041	141	TG	183.489	0.011	2039	408402
icd10-I60-both_sexes	I60 Subarachnoid haemorrhage	0.233554	0.107769	0.0319137	-0.0394712	0.186576	0.832764	0.181259	0.169703	0.287315	141	TG	154.731	0.2305	985	419546
phecode-204.4-both_sexes	Multiple myeloma	-0.22084	0.101963	0.0320141	-0.0412539	0.177424	0.816479	-0.0228728	0.173569	0.895348	141	TG	124.262	0.8522	883	414840
icd10-T78-both_sexes	T78 Adverse effects, not elsewhere classified	0.230871	0.106706	0.0321908	0.30753	0.186615	0.101624	0.134255	0.164579	0.416028	141	TG	173.973	0.0377	1125	419406
icd10-H35-both_sexes	H35 Other retinal disorders	-0.096527	0.0446208	0.0322177	-0.066275	0.078024	0.397109	-0.0845461	0.0746763	0.259499	141	TG	127.755	0.7975	4814	415717
phecode-591-both_sexes	Urinary tract infection	0.0647965	0.0299644	0.0322826	0.0317139	0.0523637	0.545737	0.045422	0.0457276	0.322268	141	TG	179.221	0.0191	15655	386584
phecode-279.11-both_sexes	Deficiency of humoral immunity	-0.549994	0.254344	0.0322863	0.305332	0.436163	0.485072	-0.372453	0.400651	0.354167	141	TG	165.414	0.0921	187	419926
phecode-964.1-both_sexes	Anticoagulants causing adverse effects	-0.384527	0.17803	0.0324833	-0.766499	0.308982	0.0143048	-0.555268	0.277771	0.0475427	141	TG	148.046	0.3539	344	383239
categorical-20002-both_sexes-1511	Non-cancer illness code, self-reported	-0.382053	0.176981	0.0325759	-0.569516	0.308778	0.0672512	-0.331968	0.305992	0.279834	141	TG	114.273	0.9599	269	420204
phecode-579.8-both_sexes	Nonspecific abnormal findings in stool contents	0.132126	0.0613669	0.0330281	0.140161	0.107399	0.194032	0.0805936	0.103664	0.438204	141	TG	119.353	0.9202	2349	390772
phecode-559-both_sexes	Ileostomy status	-0.183669	0.0853217	0.0330594	-0.098812	0.149128	0.508684	-0.146367	0.126506	0.249245	141	TG	195.076	0.0021	2003	330270
categorical-20002-both_sexes-1535	Non-cancer illness code, self-reported	-0.457162	0.212438	0.0331145	-0.462304	0.371473	0.215404	-0.402503	0.331687	0.226982	141	TG	163.946	0.1052	266	420207
categorical-20544-both_sexes-12	Mental health problems ever diagnosed by a professional	0.349896	0.162684	0.0332114	0.358338	0.284402	0.209791	0.40896	0.246376	0.0991729	141	TG	152.855	0.2616	430	135515
icd10-T81-both_sexes	T81 Complications of procedures, not elsewhere classified	0.0628315	0.0292585	0.0334784	-0.0386474	0.050127	0.442022	-0.00622134	0.0444989	0.889012	141	TG	168.873	0.0671	15356	405175
icd10-C79-both_sexes	C79 Secondary malignant neoplasm of other sites	-0.0991284	0.0462363	0.0337643	-0.125741	0.080891	0.122351	-0.097899	0.0745916	0.19151	141	TG	139.184	0.548	4923	415608
phecode-577.1-both_sexes	Acute pancreatitis	-0.152744	0.0713634	0.034058	-0.44271	0.121292	0.000370279	-0.214322	0.1124	0.0585989	141	TG	163.856	0.105	2395	417106
icd10-T90-both_sexes	T90 Sequelae of injuries of head	-0.256479	0.119891	0.0341483	-0.130425	0.209436	0.534473	-0.278413	0.198167	0.162253	141	TG	124.495	0.8491	636	419895
icd10-K74-both_sexes	K74 Fibrosis and cirrhosis of liver	-0.252752	0.118479	0.0346434	-0.253657	0.207529	0.223671	-0.14931	0.170736	0.383339	141	TG	219.375	0.0001	1145	419386
icd10-K65-both_sexes	K65 Peritonitis	-0.23405	0.109847	0.0348623	-0.275495	0.192281	0.154168	-0.338179	0.162904	0.0397287	141	TG	165.92	0.0875	1023	419508
phecode-348-both_sexes	Other conditions of brain	0.208039	0.0976414	0.0348662	0.467473	0.168779	0.00637725	0.367372	0.16512	0.0276899	141	TG	114.267	0.9591	881	403249
phecode-1010-both_sexes	Other tests	-0.0519771	0.0244006	0.0349075	-0.0632924	0.0426983	0.14052	-0.0611508	0.0370159	0.100773	141	TG	154.144	0.2385	20355	400176
icd10-C90-both_sexes	C90 Multiple myeloma and malignant plasma cell neoplasms	-0.23963	0.112671	0.035189	0.0297008	0.195207	0.879289	-0.0426282	0.183247	0.81639	141	TG	131.039	0.7306	760	419771
phecode-594.2-both_sexes	Calculus of lower urinary tract	0.241002	0.113327	0.0352067	-0.164366	0.193911	0.398099	0.0510358	0.159393	0.749304	141	TG	163.426	0.1093	944	411207
categorical-20002-both_sexes-1654	Non-cancer illness code, self-reported	0.477695	0.224823	0.0353635	0.616906	0.39286	0.11862	0.656525	0.331866	0.0498594	141	TG	172.73	0.0434	251	420222
phecode-362.7-both_sexes	Hereditary retinal dystrophies	-0.297063	0.139826	0.0353839	-0.422785	0.24423	0.0856547	-0.0496179	0.134885	0.713538	141	TG	470.889	0.0001	1804	404535
icd10-G81-both_sexes	G81 Hemiplegia	-0.154497	0.0727401	0.0354312	-0.0704208	0.127059	0.580307	-0.0784938	0.116393	0.501179	141	TG	142.996	0.4586	2014	418517
categorical-20002-both_sexes-1373	Non-cancer illness code, self-reported	-0.56308	0.265333	0.0355847	-0.237058	0.463409	0.609775	-0.0920144	0.418646	0.826355	141	TG	166.429	0.084	173	420300
icd10-R79-both_sexes	R79 Other abnormal findings of blood chemistry	0.093195	0.043959	0.0357662	0.0590611	0.0768302	0.443362	0.0828725	0.0621436	0.184512	141	TG	210.107	0.0001	8447	412084
phecode-857-both_sexes	Mechanical complication of unspecified genitourinary device, implant, and graft	0.170074	0.0802922	0.0359257	-0.0600391	0.138462	0.66524	0.131586	0.13195	0.320367	141	TG	137.597	0.5845	1576	390518
phecode-342-both_sexes	Hemiplegia	-0.154752	0.0731219	0.0360842	-0.0697807	0.127741	0.58576	-0.0755333	0.115103	0.512758	141	TG	145.536	0.4044	2025	403249
phecode-276.4-both_sexes	Acid-base balance disorder	-0.165304	0.0781643	0.0362169	-0.126574	0.13676	0.356301	-0.180434	0.125276	0.152018	141	TG	148.601	0.3435	1809	409482
categorical-20002-both_sexes-1453	Non-cancer illness code, self-reported	0.31282	0.14809	0.0364303	-0.0175819	0.256827	0.945519	0.115401	0.0782645	0.142592	141	TG	1377.13	0.0001	4815	415646
icd10-T24-both_sexes	T24 Burn and corrosion of hip and lower limb, except ankle and foot	-0.602131	0.285075	0.0364464	-0.0948392	0.496325	0.84874	-0.820246	0.455301	0.0737689	141	TG	149.247	0.3319	135	420396
phecode-289.5-both_sexes	Diseases of spleen	-0.280372	0.132745	0.0364526	-0.424811	0.23176	0.0689449	0.0122748	0.226217	0.956804	141	TG	158.427	0.1729	661	410877
icd10-W57-both_sexes	W57 Bitten or stung by non-venomous insect and other non-venomous arthropods	-0.367581	0.174035	0.0364531	-0.0887097	0.303184	0.770269	-0.0672208	0.240563	0.780326	141	TG	189.055	0.0058	460	420071
categorical-20002-both_sexes-1086	Non-cancer illness code, self-reported	-0.368214	0.17434	0.0364581	-0.412917	0.305134	0.178177	-0.374183	0.261609	0.154856	141	TG	160.735	0.1407	389	420084
icd10-K73-both_sexes	K73 Chronic hepatitis, not elsewhere classified	-0.634377	0.300737	0.0366894	-0.360662	0.525626	0.493756	-0.454605	0.409077	0.268347	141	TG	199.183	0.001	162	420369
categorical-20001-both_sexes-1070	Cancer code, self-reported	0.687703	0.32628	0.036839	-0.279526	0.562581	0.620071	-0.171853	0.468566	0.714348	141	TG	169.436	0.0634	117	420356
phecode-622.2-females	Mucous polyp of cervix	0.122981	0.0583755	0.0369261	0.0417658	0.101853	0.682393	0.0907753	0.0893585	0.311451	141	TG	165.768	0.0889	3670	213800
icd10-F22-both_sexes	F22 Persistent delusional disorders	-0.448777	0.213299	0.0371679	-0.0480634	0.371219	0.897169	-0.500811	0.324816	0.125372	141	TG	145.178	0.4112	235	420296
phecode-348.4-both_sexes	Cerebral cysts	0.510766	0.243478	0.037721	0.973947	0.423717	0.0230202	0.488328	0.410472	0.236189	141	TG	135.932	0.6231	168	403249
phecode-790.6-both_sexes	Other abnormal blood chemistry	0.0916029	0.0437132	0.0379231	0.0594923	0.0764089	0.437537	0.0879294	0.0590006	0.138391	141	TG	209.041	0.0001	8493	411762
icd10-G57-both_sexes	G57 Mononeuropathies of lower limb	0.158444	0.075613	0.0379303	0.159326	0.13231	0.230562	0.14352	0.127773	0.263257	141	TG	147.396	0.3682	1923	418608
categorical-20002-both_sexes-1072	Non-cancer illness code, self-reported	0.174897	0.0834663	0.0379336	0.120189	0.146052	0.411966	0.333917	0.121052	0.00658359	141	TG	178.013	0.0226	1897	418576
icd10-Z30-both_sexes	Z30 Contraceptive management	-0.0792037	0.037814	0.0380121	-0.0682653	0.0661981	0.304225	-0.0364062	0.0541116	0.502185	141	TG	170.186	0.0594	9253	411278
categorical-20001-both_sexes-1001	Cancer code, self-reported	-0.448807	0.214321	0.0380548	-0.709657	0.374483	0.060165	-0.723777	0.334886	0.0323757	141	TG	153.288	0.2552	246	420227
icd10-K55-both_sexes	K55 Vascular disorders of intestine	0.178004	0.0850105	0.0380718	0.214445	0.14877	0.151706	0.282198	0.13822	0.0430634	141	TG	138.424	0.5661	1428	419103
icd10-V48-both_sexes	V48 Car occupant injured in noncollision transport accident	-0.487669	0.233238	0.0383475	-0.336869	0.408083	0.410508	-0.654922	0.333417	0.0514788	141	TG	171.904	0.0483	233	420298
phecode-577-both_sexes	Diseases of pancreas	-0.122321	0.0585506	0.0385033	-0.334059	0.100151	0.00109189	-0.226299	0.0938469	0.0171893	141	TG	158.485	0.1707	3425	417106
icd10-D80-both_sexes	D80 Immunodeficiency with predominantly antibody defects	-0.513691	0.246221	0.0387656	0.186635	0.424676	0.660999	-0.445743	0.383372	0.246933	141	TG	159.117	0.1632	192	420339
phecode-292.3-both_sexes	Memory loss	0.223454	0.107218	0.0389674	0.416401	0.18661	0.0272566	0.166924	0.170009	0.327865	141	TG	140.636	0.5134	904	410833
phecode-783-both_sexes	Fever of unknown origin	0.112824	0.0542032	0.0392092	-0.142476	0.0911082	0.120135	0.00711718	0.0814324	0.930479	141	TG	199.781	0.001	5046	415485
phecode-276.12-both_sexes	Hyposmolality and/or hyponatremia	-0.127945	0.0616056	0.0396445	-0.122864	0.107855	0.256595	-0.0682086	0.101247	0.501622	141	TG	146.607	0.3832	2920	409482
categorical-20002-both_sexes-1529	Non-cancer illness code, self-reported	0.230134	0.110844	0.039705	0.0586373	0.193024	0.761747	0.141768	0.211148	0.503063	141	TG	100.174	0.9972	603	419870
phecode-696-both_sexes	Psoriasis and related disorders	0.229921	0.110746	0.0397117	0.185263	0.19383	0.340833	0.128168	0.101232	0.207589	141	TG	484.001	0.0001	2979	406978
icd10-H52-both_sexes	H52 Disorders of refraction and accommodation	0.135298	0.0653273	0.0401871	0.308491	0.112868	0.00708791	0.217668	0.111217	0.0523194	141	TG	145.154	0.4135	2521	418010
icd10-I44-both_sexes	I44 Atrioventricular and left bundle-branch block	0.100757	0.0486582	0.0402226	-0.0771799	0.0831318	0.354807	-0.0105736	0.0778791	0.892198	141	TG	160.935	0.1382	5189	415342
icd10-K61-both_sexes	K61 Abscess of anal and rectal regions	0.173547	0.0839964	0.0406595	0.197477	0.147044	0.181468	0.04996	0.13504	0.711968	141	TG	139.771	0.534	1472	419059
phecode-218.2-females	Other benign neoplasm of uterus	0.344738	0.167166	0.0410324	0.232127	0.292241	0.428374	0.32511	0.266949	0.22532	141	TG	148.154	0.3533	389	209602
categorical-20001-both_sexes-1059	Cancer code, self-reported	0.126274	0.0612391	0.0410581	-0.0659226	0.105306	0.532333	0.0329522	0.092835	0.723158	141	TG	166.78	0.0817	3322	417151
phecode-293-both_sexes	Symptoms involving head and neck	0.154208	0.0747963	0.0410859	0.00842217	0.130246	0.948535	0.0324418	0.102602	0.752328	141	TG	193.631	0.0028	2598	416916
phecode-301-both_sexes	Personality disorders	0.338533	0.164268	0.0411668	-0.256712	0.280879	0.36232	0.15289	0.250931	0.54332	141	TG	164.674	0.0976	446	369930
phecode-628-females	Ovarian cyst	0.103151	0.0501408	0.0415208	0.0512604	0.087601	0.559391	0.0873857	0.0760424	0.252445	141	TG	173.308	0.0405	5287	194287
phecode-575.1-both_sexes	Cholangitis	-0.252745	0.122868	0.0415387	-0.21349	0.215	0.322446	-0.17653	0.197775	0.373615	141	TG	145.748	0.3988	711	399542
phecode-475-both_sexes	Chronic sinusitis	-0.136012	0.0662814	0.0420288	0.0188082	0.114952	0.87027	-0.103435	0.0992148	0.298961	141	TG	177.444	0.024	3026	398757
phecode-700-both_sexes	Corns and callosities	-0.358613	0.174848	0.0421319	-0.143284	0.305095	0.639351	-0.248035	0.272029	0.363443	141	TG	149.775	0.3214	361	413923
categorical-6152-both_sexes-5	Blood clot, DVT, bronchitis, emphysema, asthma, rhinitis, eczema, allergy diagnosed by doctor	-0.101535	0.0495335	0.0422472	0.0416521	0.0854118	0.626557	-0.135109	0.0574603	0.0200999	141	TG	273.673	0.0001	8632	411136
icd10-A41-both_sexes	A41 Other septicaemia	-0.0994425	0.0486071	0.0426439	0.0553936	0.0835709	0.508535	-0.0915178	0.069791	0.191899	141	TG	173.143	0.0413	5512	415019
phecode-561.1-both_sexes	Diarrhea	-0.358753	0.175571	0.0428934	0.0532085	0.304252	0.861426	0.151652	0.206832	0.464656	141	TG	283.821	0.0001	679	330270
icd10-E27-both_sexes	E27 Other disorders of adrenal gland	-0.363459	0.178122	0.0431793	-0.213119	0.311359	0.494813	-0.172066	0.214221	0.423211	141	TG	259.914	0.0001	607	419924
phecode-279.1-both_sexes	Immunity deficiency	-0.420497	0.206114	0.0432192	-0.216183	0.360004	0.549149	-0.419364	0.320363	0.19267	141	TG	156.557	0.1987	270	419926
phecode-155-both_sexes	Cancer of liver and intrahepatic bile duct	-0.289251	0.141808	0.043257	-0.44274	0.247772	0.0761359	-0.260327	0.232012	0.263765	141	TG	149.154	0.333	545	400294
phecode-110.1-both_sexes	Dermatophytosis	-0.358854	0.176287	0.0436742	-0.260411	0.308367	0.39985	-0.332754	0.275449	0.229068	141	TG	152.581	0.2681	362	416798
categorical-20002-both_sexes-1224	Non-cancer illness code, self-reported	-0.194622	0.0957801	0.0440489	-0.295802	0.167213	0.0790852	-0.253038	0.157636	0.110702	141	TG	134.275	0.6626	1082	419391
phecode-227.2-both_sexes	Benign neoplasm of parathyroid gland	0.277891	0.136774	0.0440708	0.0397547	0.238026	0.867598	0.376378	0.231316	0.105961	141	TG	116.826	0.9432	460	418625
icd10-V18-both_sexes	V18 Pedal cyclist injured in noncollision transport accident	0.166288	0.0819407	0.0443153	0.101273	0.14326	0.480802	0.17835	0.137208	0.195787	141	TG	129.78	0.7549	1426	419105
categorical-20002-both_sexes-1448	Non-cancer illness code, self-reported	-0.656771	0.32439	0.0448064	-0.0953846	0.564276	0.866012	-0.292264	0.484591	0.547408	141	TG	158.46	0.1716	111	420362
icd10-D73-both_sexes	D73 Diseases of spleen	-0.270768	0.13375	0.044827	-0.412725	0.233538	0.0793771	0.0358727	0.219803	0.870593	141	TG	160.544	0.1445	660	419871
phecode-749-both_sexes	Congenital anomalies of face and neck	-0.361859	0.178899	0.045008	-0.19733	0.312984	0.529417	-0.260041	0.271952	0.340619	141	TG	162.668	0.118	374	420099
phecode-600-males	Hyperplasia of prostate	0.101094	0.0500538	0.0453213	-0.0650341	0.0858987	0.45027	-0.0295411	0.0497345	0.553487	141	TG	405.776	0.0001	14126	169762
icd10-K82-both_sexes	K82 Other diseases of gallbladder	-0.16313	0.0807863	0.045367	-0.352714	0.140019	0.0128998	-0.251708	0.115958	0.0316408	141	TG	193.147	0.0031	2202	418329
icd10-R46-both_sexes	R46 Symptoms and signs involving appearance and behaviour	-0.412698	0.204886	0.0458959	-0.0165743	0.356445	0.962979	-0.0704091	0.314337	0.82309	141	TG	155.088	0.2233	272	420259
phecode-430.1-both_sexes	Subarachnoid hemorrhage	0.213586	0.106125	0.0460766	-0.0868515	0.183226	0.636234	0.167096	0.175004	0.34132	141	TG	153.332	0.2525	1005	407633
phecode-289.3-both_sexes	Personal history of diseases of blood and blood-forming organs	-0.370583	0.184142	0.0460872	-0.164928	0.321679	0.608967	-0.542862	0.278494	0.0532611	141	TG	186.903	0.0084	404	410877
icd10-Z91-both_sexes	Z91 Personal history of risk-factors, not elsewhere classified	-0.0774516	0.0385129	0.0462393	0.00726376	0.0668108	0.91358	-0.0604974	0.0591819	0.308437	141	TG	144.205	0.4317	7445	413086
phecode-507-both_sexes	Pleurisy; pleural effusion	-0.071585	0.0356051	0.0462958	0.00803176	0.0617976	0.896779	-0.0665048	0.0557763	0.235142	141	TG	143.295	0.4533	8715	404684
icd10-I07-both_sexes	I07 Rheumatic tricuspid valve diseases	0.290448	0.144561	0.0464408	-0.141203	0.249072	0.571687	0.247345	0.240696	0.305898	141	TG	135.376	0.6336	478	420053
icd10-J01-both_sexes	J01 Acute sinusitis	-0.427312	0.212825	0.046588	-1.32841	0.36052	0.000327163	-0.746574	0.355422	0.0374755	141	TG	135.211	0.6397	219	420312
icd10-G90-both_sexes	G90 Disorders of autonomic nervous system	0.302509	0.150849	0.0468506	0.131417	0.263571	0.618847	0.0711583	0.273142	0.794847	141	TG	103.321	0.9944	335	420196
icd10-W13-both_sexes	W13 Fall from, out of or through building or structure	0.359188	0.179359	0.0471489	0.781967	0.310992	0.0130623	0.162716	0.285367	0.569457	141	TG	159.021	0.164	362	420169
phecode-575.6-both_sexes	Cholesterolosis of gallbladder	-0.335231	0.167419	0.0471791	-0.53243	0.292346	0.0707213	-0.310487	0.244959	0.207078	141	TG	209.286	0.0001	549	399542
phecode-379.3-both_sexes	Aphakia and other disorders of lens	-0.141514	0.0706971	0.0472497	-0.0366733	0.123297	0.766575	-0.0681557	0.103138	0.509814	141	TG	182.604	0.0127	2743	410363
phecode-941-both_sexes	Adverse reaction to serum or vaccine	0.333103	0.166467	0.0473242	0.124964	0.290393	0.667625	0.175726	0.287015	0.541362	141	TG	120.914	0.9008	322	412489
icd10-I80-both_sexes	I80 Phlebitis and thrombophlebitis	-0.107629	0.0538088	0.0474113	-0.0815201	0.0941348	0.387986	-0.146514	0.0795146	0.0675015	141	TG	180.884	0.0154	4746	415785
icd10-H81-both_sexes	H81 Disorders of vestibular function	0.159246	0.0796539	0.0475192	0.154338	0.139406	0.270158	0.0991581	0.134553	0.46239	141	TG	112.704	0.9689	1319	419212
icd10-N21-both_sexes	N21 Calculus of lower urinary tract	0.226158	0.113254	0.0477747	-0.176865	0.193826	0.363089	0.0237627	0.168786	0.888241	141	TG	162.016	0.1243	936	419595
phecode-256.4-females	Polycystic ovaries	0.418675	0.209727	0.0478428	0.680937	0.365962	0.0649027	0.729642	0.350096	0.0389668	141	TG	146.929	0.3768	245	224884
phecode-251-both_sexes	Other disorders of pancreatic internal secretion	-0.315954	0.159067	0.0489536	-0.211553	0.278165	0.448226	-0.0697471	0.143379	0.627407	141	TG	445.398	0.0001	1310	415877
phecode-451-both_sexes	Phlebitis and thrombophlebitis	-0.106658	0.0537306	0.0490936	-0.0797327	0.0939997	0.397772	-0.167014	0.0814284	0.042127	141	TG	181.745	0.0138	4797	376206
phecode-1000-both_sexes	Burns	-0.243284	0.122847	0.0496207	-0.308303	0.215144	0.154101	-0.00888221	0.197948	0.964274	141	TG	138.107	0.5713	675	419856
icd10-C78-both_sexes	C78 Secondary malignant neoplasm of respiratory and digestive organs	-0.0929864	0.0469919	0.0498034	-0.166158	0.0819225	0.0444472	-0.159961	0.0708452	0.0254992	141	TG	182.018	0.0134	6269	414262
phecode-871-both_sexes	Open wounds of extremities	-0.0805503	0.0407081	0.0498087	-0.0859899	0.0712748	0.229691	-0.0560147	0.0621873	0.369272	141	TG	172.84	0.0422	7886	400468
icd10-R09-both_sexes	R09 Other symptoms and signs involving the circulatory and respiratory systems	-0.167353	0.084605	0.0498865	-0.160759	0.148089	0.279554	-0.222196	0.142623	0.121508	141	TG	134.269	0.6615	1376	419155
icd10-E16-both_sexes	E16 Other disorders of pancreatic internal secretion	-0.320834	0.162275	0.0499944	-0.219324	0.283767	0.440894	-0.0230098	0.153094	0.880746	141	TG	457.615	0.0001	1293	419238
phecode-709-both_sexes	Diffuse diseases of connective tissue	-0.414118	0.209515	0.0500568	0.440734	0.355508	0.217164	-0.0693343	0.16186	0.669048	141	TG	682.13	0.0001	1156	411677
phecode-735.1-both_sexes	Flat foot	0.40781	0.206678	0.0504464	0.671582	0.360558	0.0646272	0.362005	0.357064	0.31241	141	TG	148.545	0.3428	255	403527
icd10-T83-both_sexes	T83 Complications of genito-urinary prosthetic devices, implants and grafts	0.158544	0.0804132	0.0506242	-0.0505932	0.139029	0.716483	0.160825	0.131658	0.223935	141	TG	137.015	0.597	1566	418965
phecode-626-females	Disorders of menstruation and other abnormal bleeding from female genital tract	0.0611984	0.0310825	0.050939	0.0543031	0.054424	0.32012	0.0525011	0.042317	0.216806	141	TG	217.973	0.0001	19544	194287
phecode-567-both_sexes	Peritonitis and retroperitoneal infections	-0.20754	0.10543	0.0509852	-0.220586	0.184604	0.234155	-0.362522	0.15489	0.0206691	141	TG	166.523	0.0836	1117	383086
phecode-153.2-both_sexes	Colon cancer	-0.108014	0.0549	0.0511052	-0.0643197	0.0960194	0.504057	-0.00552977	0.0834909	0.947288	141	TG	152.678	0.2662	3856	386740
phecode-565.1-both_sexes	Anal and rectal polyp	0.07581	0.0385565	0.0512533	0.0267016	0.067315	0.692222	0.0239387	0.0546572	0.662076	141	TG	180.831	0.0161	9413	383086
icd10-R50-both_sexes	R50 Fever of unknown origin	0.105414	0.0536131	0.0512547	-0.154344	0.0898892	0.0881984	0.0315211	0.0834804	0.706309	141	TG	193.561	0.0031	4989	415542
phecode-634.1-females	Missed abortion/Hydatidiform mole	-0.18748	0.0955289	0.0516815	-0.31398	0.166812	0.0618944	-0.25524	0.150486	0.0920878	141	TG	158.551	0.1714	1309	219979
phecode-871.1-both_sexes	Open wound of hand except finger(s)	-0.510482	0.260127	0.0516948	0.50129	0.445273	0.262189	-0.295887	0.472355	0.532067	141	TG	105.07	0.9926	112	400468
phecode-221-females	Benign neoplasm of other female genital organs	-0.440589	0.224571	0.051756	-0.971955	0.38904	0.0136428	-0.61788	0.332639	0.0653397	141	TG	162.267	0.122	237	197179
phecode-565-both_sexes	Anal and rectal conditions	0.050598	0.0257917	0.0517699	-0.00217569	0.0448259	0.961358	0.0383791	0.0396509	0.33475	141	TG	152.772	0.2644	18123	383086
phecode-773-both_sexes	Pain in limb	0.0767243	0.0391268	0.0518737	-0.0207396	0.0677555	0.75999	-0.00119499	0.0602649	0.984208	141	TG	152.697	0.2653	7621	412910
icd10-Q51-both_sexes	Q51 Congenital malformations of uterus and cervix	-0.437452	0.223212	0.0520047	-0.29455	0.390174	0.451574	-0.104536	0.349578	0.765357	141	TG	149.623	0.3244	221	420310
categorical-20002-both_sexes-1471	Non-cancer illness code, self-reported	-0.114835	0.0586109	0.0520669	0.0642084	0.100879	0.525503	0.0106021	0.0944744	0.910808	141	TG	145.654	0.4018	3240	417233
phecode-592.12-both_sexes	Chronic cystitis	0.222059	0.113432	0.0522599	0.0192476	0.19747	0.922493	0.0735254	0.172987	0.671465	141	TG	184.603	0.011	1057	386584
icd10-I12-both_sexes	I12 Hypertensive renal disease	-0.160344	0.0819106	0.0522726	-0.190099	0.143358	0.186998	-0.192309	0.125039	0.126308	141	TG	144.632	0.423	1608	418923
phecode-250.11-both_sexes	Type 1 diabetes with ketoacidosis	-0.743172	0.380325	0.052689	-0.427822	0.663997	0.520434	-0.163838	0.317478	0.606626	141	TG	587.393	0.0001	302	396181
phecode-253.3-both_sexes	Diabetes insipidus	-0.615568	0.315572	0.0530968	-0.259004	0.552751	0.640109	-0.893568	0.51871	0.0871558	141	TG	148.316	0.3502	109	415877
phecode-250.13-both_sexes	Type 1 diabetes with ophthalmic manifestations	-0.61786	0.317155	0.0533994	-0.511997	0.553931	0.356933	-0.39236	0.245583	0.112371	141	TG	773.792	0.0001	573	396181
phecode-696.4-both_sexes	Psoriasis	0.218249	0.112053	0.0534484	0.163209	0.196093	0.406665	0.111049	0.103043	0.283023	141	TG	484.813	0.0001	2904	406978
phecode-281.1-both_sexes	Megaloblastic anemia	-0.223807	0.114974	0.0535872	-0.0520116	0.200598	0.795801	-0.242383	0.152996	0.115395	141	TG	241.259	0.0001	1366	396365
phecode-599-both_sexes	Other symptoms/disorders or the urinary system	0.0581464	0.0298828	0.0536797	-0.115843	0.0491212	0.0197512	-0.0231009	0.0406192	0.570457	141	TG	175.674	0.0304	15398	395845
phecode-651-females	Multiple gestation	0.37726	0.194284	0.0541699	-0.227671	0.33418	0.496826	-0.0933759	0.276652	0.736229	141	TG	189.905	0.0049	376	227125
phecode-780-both_sexes	Hypothermia/Chills	-0.419977	0.216439	0.0543419	0.0540302	0.375835	0.885898	-0.334109	0.330311	0.313522	141	TG	163.572	0.108	257	420274
phecode-426.4-both_sexes	Anomalous atrioventricular excitation	0.38635	0.199386	0.0546728	-0.313061	0.341565	0.360966	0.356691	0.31377	0.257567	141	TG	139.198	0.5479	257	384657
icd10-S49-both_sexes	S49 Other and unspecified injuries of shoulder and upper arm	-0.504116	0.260332	0.0548294	-0.6252	0.455266	0.171882	-0.699573	0.367453	0.0589827	141	TG	175.453	0.032	190	420341
phecode-958-both_sexes	Certain early complications of trauma or procedure	-0.232222	0.119957	0.0548979	-0.0984315	0.209557	0.639297	-0.000133475	0.208237	0.999489	141	TG	126.993	0.8101	649	419882
icd10-N92-both_sexes	N92 Excessive, frequent and irregular menstruation	0.0680357	0.035153	0.054955	0.0544688	0.0614811	0.377177	0.07105	0.0491904	0.150864	141	TG	204.585	0.0002	13629	406902
icd10-Y09-both_sexes	Y09 Assault by unspecified means	-0.469657	0.242667	0.0549571	-0.322429	0.425683	0.450069	-0.634685	0.38569	0.102093	141	TG	149.693	0.3229	188	420343
phecode-557.1-both_sexes	Celiac disease	-0.960017	0.49606	0.0550154	0.634958	0.843297	0.452783	0.0858302	0.119435	0.473588	138	TG	6720.82	0.0001	2202	330260
phecode-626.1-females	Irregular menstrual cycle/bleeding	0.0633818	0.0327731	0.0551353	0.0283591	0.0572632	0.621212	0.0294315	0.0445055	0.509507	141	TG	209.787	0.0001	16625	194287
icd10-K90-both_sexes	K90 Intestinal malabsorption	-0.865101	0.447709	0.0553883	0.554634	0.761647	0.467741	0.133709	0.109668	0.224858	138	TG	6324.09	0.0001	2498	418021
icd10-H70-both_sexes	H70 Mastoiditis and related conditions	-0.475653	0.246213	0.055395	-0.256742	0.430658	0.552037	-0.497311	0.456688	0.278046	141	TG	98.547	0.9981	120	420411
phecode-425.11-both_sexes	Hypertrophic obstructive cardiomyopathy	-0.501629	0.259929	0.0556459	-1.13327	0.450207	0.012964	-1.00842	0.389641	0.0106693	141	TG	153.935	0.2423	167	416313
phecode-619.4-females	Noninflammatory disorders of vagina	-0.142223	0.0737746	0.0559042	-0.0981918	0.129178	0.448467	-0.1266	0.114029	0.268799	141	TG	148.491	0.3455	2049	212227
icd10-J35-both_sexes	J35 Chronic diseases of tonsils and adenoids	0.207992	0.107935	0.0560041	0.280646	0.188831	0.139483	0.185036	0.165556	0.265622	141	TG	171.55	0.05	1087	419444
phecode-523.31-both_sexes	Acute periodontitis	-0.471665	0.244982	0.0562186	-0.907318	0.426321	0.0350804	-0.543398	0.408384	0.185482	141	TG	138.443	0.5642	169	408157
icd10-E28-both_sexes	E28 Ovarian dysfunction	0.349704	0.181895	0.0565666	0.504797	0.31784	0.11451	0.764529	0.318336	0.0176339	141	TG	133.83	0.6736	297	420234
phecode-726.1-both_sexes	Enthesopathy	-0.0717072	0.0373035	0.0566033	-0.0325485	0.0651636	0.618224	-0.0382686	0.0608991	0.53077	141	TG	151.797	0.2831	8254	386932
icd10-E23-both_sexes	E23 Hypofunction and other disorders of pituitary gland	-0.299109	0.155817	0.0569409	-0.384009	0.272748	0.161385	-0.293239	0.243199	0.229943	141	TG	157.817	0.1806	478	420053
phecode-590-both_sexes	Pyelonephritis	0.167692	0.0875142	0.0573811	0.0376944	0.152648	0.805322	0.0821393	0.128285	0.523031	141	TG	179.658	0.0184	1737	386584
phecode-870.1-both_sexes	Open wound or laceration of eye or eyelid	-0.118275	0.0617145	0.0574639	-0.116864	0.106774	0.275744	-0.144929	0.0912399	0.114579	133	TG	155.714	0.0956	3372	400468
icd10-O75-both_sexes	O75 Other complications of labour and delivery, not elsewhere classified	-0.214181	0.111853	0.0575524	0.22222	0.190435	0.245244	-0.0915448	0.191513	0.633389	141	TG	126.488	0.8182	757	419774
phecode-117-both_sexes	Mycoses	-0.317585	0.166105	0.057925	-0.152924	0.290252	0.599127	-0.326031	0.276375	0.240132	141	TG	127.792	0.7965	342	416798
icd10-L40-both_sexes	L40 Psoriasis	0.21373	0.111791	0.057935	0.154878	0.195605	0.429833	0.10121	0.102954	0.327274	141	TG	475.104	0.0001	2868	417663
icd10-C83-both_sexes	C83 Diffuse non-Hodgkin's lymphoma	-0.222232	0.116244	0.057949	0.223606	0.198112	0.260973	0.0229532	0.157344	0.884227	141	TG	199.675	0.0008	1092	419439
categorical-20002-both_sexes-1419	Non-cancer illness code, self-reported	0.442996	0.231807	0.058042	-0.0199376	0.403032	0.960617	0.405031	0.401274	0.314542	141	TG	125.567	0.8336	172	420301
phecode-586.4-both_sexes	Stricture/obstruction of ureter	0.170545	0.0892842	0.0581607	0.359561	0.155087	0.0218843	0.206859	0.145612	0.157652	141	TG	123.092	0.8697	1145	401927
icd10-H61-both_sexes	H61 Other disorders of external ear	-0.221955	0.116295	0.0583662	-0.254975	0.203485	0.212295	-0.168073	0.164467	0.30858	141	TG	208.224	0.0001	1131	419400
phecode-345.12-both_sexes	Partial epilepsy	-0.365393	0.19145	0.0583666	-0.344089	0.335083	0.306262	0.100551	0.318058	0.752367	141	TG	172.719	0.0442	345	403249
icd10-H04-both_sexes	H04 Disorders of lachrymal system	0.119259	0.0625523	0.0586287	0.0820355	0.109452	0.454816	0.159166	0.106836	0.138522	141	TG	141.243	0.4995	2684	417847
phecode-696.41-both_sexes	Psoriasis vulgaris	0.389039	0.204145	0.0587389	0.455091	0.357961	0.205731	0.164476	0.300979	0.585612	141	TG	170.038	0.0595	301	406978
icd10-H74-both_sexes	H74 Other disorders of middle ear and mastoid	0.26712	0.140204	0.0588014	0.157728	0.245254	0.521204	0.162799	0.22453	0.469622	141	TG	130.006	0.7504	488	420043
phecode-557-both_sexes	Intestinal malabsorption (non-celiac)	-0.846782	0.444505	0.0588755	0.574445	0.75608	0.448708	0.155099	0.112696	0.170987	138	TG	6259.81	0.0001	2516	330260
phecode-709.2-both_sexes	Sicca syndrome	-0.505955	0.266348	0.0595419	0.589786	0.451556	0.19367	0.127583	0.223963	0.569821	141	TG	627.611	0.0001	661	411677
icd10-G40-both_sexes	G40 Epilepsy	-0.10149	0.0534413	0.0596086	-0.169428	0.0932901	0.0715043	-0.132454	0.0790921	0.096228	141	TG	165.823	0.0885	4345	416186
categorical-20001-both_sexes-1060	Cancer code, self-reported	-0.269019	0.141744	0.0597651	-0.366584	0.247898	0.141464	-0.360863	0.207693	0.0845004	141	TG	169.582	0.0631	625	419848
phecode-362.29-both_sexes	Macular degeneration (senile) of retina NOS	-0.104616	0.0551627	0.0599533	0.0311543	0.0955257	0.744813	-0.0323052	0.0898728	0.719797	141	TG	134.281	0.6623	3298	404535
icd10-H18-both_sexes	H18 Other disorders of cornea	-0.228565	0.120587	0.0600954	-0.0276542	0.210006	0.895426	-0.170474	0.17329	0.326936	141	TG	175.213	0.0332	895	419636
categorical-20001-both_sexes-99999	Cancer code, self-reported	0.302834	0.15999	0.0604439	-0.270536	0.273945	0.325087	0.121133	0.237641	0.611042	141	TG	160.894	0.1391	465	420008
categorical-20002-both_sexes-1387	Non-cancer illness code, self-reported	0.0563624	0.0298055	0.0606893	0.0544345	0.0521391	0.298286	0.0263232	0.0377517	0.486788	141	TG	256.164	0.0001	23835	396638
phecode-442.8-both_sexes	Aneurysm of other specified artery	0.345155	0.182528	0.0606945	-0.144039	0.315371	0.648579	-0.0786003	0.326398	0.810054	141	TG	122.515	0.8794	269	408565
categorical-20002-both_sexes-1416	Non-cancer illness code, self-reported	0.118627	0.0627393	0.0607191	0.183107	0.109625	0.0971108	0.192821	0.103548	0.0646782	141	TG	139.01	0.5524	2624	417849
phecode-870.6-both_sexes	Open wound of neck	-0.405145	0.214347	0.0608065	-0.106023	0.374019	0.777238	-0.737831	0.361364	0.0430499	141	TG	140.81	0.51	224	400468
categorical-20002-both_sexes-1083	Non-cancer illness code, self-reported	-0.383127	0.202936	0.061106	-0.151069	0.354654	0.670794	-0.588319	0.393517	0.137158	141	TG	94.7897	0.9995	169	420304
icd10-I77-both_sexes	I77 Other disorders of arteries and arterioles	0.170485	0.0904196	0.0614365	0.449345	0.155702	0.00452617	0.303514	0.12067	0.013025	141	TG	192.63	0.0033	1784	418747
phecode-694.3-both_sexes	Vascular disorders of skin	-0.662535	0.351681	0.0616505	0.402379	0.605488	0.507438	0.00818409	0.450799	0.985541	141	TG	248.667	0.0001	148	412638
icd10-D26-both_sexes	D26 Other benign neoplasms of uterus	0.326776	0.173473	0.0616751	0.175128	0.303015	0.564233	0.259408	0.275253	0.347593	141	TG	154.789	0.2296	377	420154
icd10-D28-both_sexes	D28 Benign neoplasm of other and unspecified female genital organs	-0.429333	0.227974	0.0617409	-0.966874	0.394937	0.0156042	-0.698546	0.347102	0.0460843	141	TG	163.155	0.1125	231	420300
icd10-T23-both_sexes	T23 Burn and corrosion of wrist and hand	-0.462481	0.245579	0.0617444	-0.492503	0.429955	0.25398	0.060885	0.386065	0.874915	141	TG	159.066	0.1635	190	420341
icd10-L95-both_sexes	L95 Vasculitis limited to skin, not elsewhere classified	-0.661612	0.35137	0.0617821	0.398464	0.605034	0.511254	0.00397231	0.458273	0.993096	141	TG	248.256	0.0001	148	420383
phecode-614.5-females	Inflammatory disease of cervix, vagina, and vulva	0.114977	0.0610734	0.0618293	0.0478626	0.106696	0.654427	-0.0150037	0.0905455	0.868629	141	TG	164.484	0.0988	3300	217500
phecode-379.9-both_sexes	Pain, swelling or discharge of eye	-0.375983	0.199939	0.0621185	-0.721017	0.348033	0.0401426	-0.303933	0.351309	0.388441	141	TG	116.074	0.9479	213	410363
icd10-H36-both_sexes	H36 Retinal disorders in diseases classified elsewhere	-0.284333	0.151273	0.0622414	-0.435655	0.264096	0.101281	0.0461592	0.1411	0.744052	141	TG	519.383	0.0001	1706	418825
phecode-200-both_sexes	Myeloproliferative disease	-0.176608	0.0940329	0.0624398	-0.44509	0.162304	0.00690391	-0.181552	0.159284	0.256317	141	TG	150.431	0.3096	1255	414840
phecode-159-both_sexes	Malignant neoplasm of other and ill-defined sites within the digestive organs and peritoneum	-0.0787706	0.0419426	0.0624532	-0.117473	0.0733185	0.111375	-0.0292353	0.0622155	0.639155	141	TG	162.39	0.1208	7067	400294
phecode-578.2-both_sexes	Blood in stool	0.115057	0.0614797	0.0633669	-0.0452516	0.106424	0.671348	0.0246906	0.0915242	0.787734	141	TG	159.09	0.1646	3161	390772
icd10-T14-both_sexes	T14 Injury of unspecified body region	0.349413	0.187126	0.0639559	0.116047	0.326754	0.723014	0.0787352	0.33082	0.812229	141	TG	128.272	0.7861	267	420264
icd10-Z35-both_sexes	Z35 Supervision of high-risk pregnancy	-0.186649	0.100011	0.0640948	-0.155575	0.174894	0.375248	-0.344407	0.157819	0.0307559	141	TG	141.185	0.4992	1059	419472
categorical-20002-both_sexes-1094	Non-cancer illness code, self-reported	-0.0935499	0.0501458	0.064196	0.062062	0.0862675	0.473094	-0.0822021	0.0583072	0.160813	141	TG	275.953	0.0001	8452	412021
categorical-20002-both_sexes-1476	Non-cancer illness code, self-reported	0.0987947	0.0529771	0.0642953	0.138696	0.0926579	0.136697	0.110491	0.0861646	0.201848	141	TG	150.195	0.3137	3993	416480
icd10-I82-both_sexes	I82 Other venous embolism and thrombosis	-0.247537	0.132781	0.06438	-0.137606	0.232129	0.554278	-0.28207	0.239465	0.240827	141	TG	123.25	0.8676	514	420017
phecode-295.2-both_sexes	Paranoid disorders	-0.396502	0.213016	0.0647889	0.1121	0.369188	0.761857	-0.417332	0.333477	0.212855	141	TG	151.546	0.2864	246	369930
phecode-752.11-both_sexes	Spina bifida	0.360009	0.193549	0.0649776	0.119984	0.337936	0.723091	0.0716695	0.339254	0.832994	141	TG	125.13	0.8388	244	419889
phecode-377-both_sexes	Disorders of optic nerve and visual pathways	0.2473	0.133044	0.065158	0.607016	0.229866	0.00921897	0.262725	0.234525	0.264529	141	TG	131.914	0.7115	547	410363
phecode-038-both_sexes	Septicemia	-0.086109	0.0463446	0.0652668	0.0788668	0.0793141	0.321775	-0.0453347	0.0709883	0.524112	141	TG	166.799	0.0817	5845	401597
phecode-333.4-both_sexes	Torsion dystonia	-0.349626	0.188191	0.065294	-0.115224	0.328378	0.726204	-0.252516	0.298789	0.399478	141	TG	162.577	0.1189	337	403249
phecode-362.2-both_sexes	Degeneration of macula and posterior pole of retina	-0.102123	0.05498	0.0653473	0.0324861	0.0952222	0.733497	-0.04387	0.0922653	0.635188	141	TG	133.8	0.6736	3301	404535
icd10-C54-both_sexes	C54 Malignant neoplasm of corpus uteri	-0.163663	0.0881211	0.0653757	-0.187601	0.154215	0.225859	-0.110391	0.139497	0.430078	141	TG	153.772	0.2466	1471	419060
phecode-613-both_sexes	Other nonmalignant breast conditions	0.121899	0.0656581	0.0654739	0.0645612	0.114942	0.575234	0.0485908	0.110125	0.659727	141	TG	129.777	0.7549	2242	418289
icd10-Z44-both_sexes	Z44 Fitting and adjustment of external prosthetic device	0.530519	0.285849	0.0655639	0.520114	0.500263	0.300293	0.912713	0.48549	0.0621881	141	TG	137.665	0.5825	123	420408
phecode-427.12-both_sexes	Paroxysmal ventricular tachycardia	0.190755	0.102796	0.0656036	0.0564125	0.179363	0.753601	0.0693666	0.156872	0.659036	141	TG	170.566	0.0568	1200	384657
phecode-202-both_sexes	Cancer of other lymphoid, histiocytic tissue	-0.155776	0.0839559	0.0656352	0.11406	0.144232	0.430402	-0.0311228	0.0953388	0.744576	141	TG	272.88	0.0001	2895	414840
icd10-D07-both_sexes	D07 Carcinoma in situ of other and unspecified genital organs	-0.23839	0.128772	0.0662387	-0.418648	0.224514	0.0643343	-0.0736028	0.21224	0.72927	141	TG	132.051	0.7101	586	419945
icd10-R61-both_sexes	R61 Hyperhidrosis	0.238091	0.128616	0.0662514	0.407679	0.224521	0.0715605	0.403349	0.205863	0.052064	141	TG	164.463	0.0999	730	419801
phecode-803.1-both_sexes	Fracture of humerus	-0.126059	0.0681093	0.0663013	-0.177518	0.119195	0.138672	-0.0687877	0.109195	0.529751	141	TG	131.725	0.716	2112	395047
phecode-447-both_sexes	Other disorders of arteries and arterioles	0.165174	0.0892876	0.066435	0.371584	0.154931	0.0177949	0.308298	0.120188	0.0113663	141	TG	202.079	0.0007	1921	408565
icd10-Z73-both_sexes	Z73 Problems related to life-management difficulty	-0.205815	0.111283	0.0664972	-0.206018	0.194751	0.291957	-0.218037	0.177443	0.221218	141	TG	148.876	0.3385	891	419640
phecode-041-both_sexes	Bacterial infection NOS	0.0487369	0.0263596	0.0665773	0.0594968	0.0461408	0.199379	0.0274314	0.0432539	0.526988	141	TG	133.09	0.6898	14857	401597
phecode-250.7-both_sexes	Diabetic retinopathy	-0.277419	0.150111	0.066699	-0.424604	0.262106	0.107506	0.0422704	0.139095	0.761658	141	TG	514.073	0.0001	1709	404535
phecode-395.1-both_sexes	Nonrheumatic mitral valve disorders	0.112628	0.0609926	0.0669179	0.322704	0.104535	0.00244073	0.142654	0.0913113	0.12048	141	TG	158.828	0.1676	3161	400902
phecode-251.1-both_sexes	Hypoglycemia	-0.29369	0.159107	0.067024	-0.188204	0.278271	0.499954	-0.0806955	0.14635	0.582248	141	TG	442.482	0.0001	1305	393093
phecode-317-both_sexes	Alcohol-related disorders	-0.0612363	0.0331822	0.0670838	-0.116212	0.0578361	0.0464371	-0.0646172	0.0485138	0.185046	141	TG	219.523	0.0001	16070	392046
categorical-20002-both_sexes-1456	Non-cancer illness code, self-reported	-0.956353	0.518139	0.0670874	0.653787	0.881988	0.459811	0.142789	0.129368	0.271641	138	TG	6431.3	0.0001	1827	418634
phecode-626.4-females	Premenstrual tension syndromes	0.511703	0.277322	0.0671267	-0.0189455	0.483	0.968768	-0.147669	0.428846	0.731106	141	TG	173.959	0.0378	166	194287
phecode-288.1-both_sexes	Decreased white blood cell count	-0.098145	0.0532942	0.0676543	0.0465837	0.092062	0.613656	0.0306313	0.0817499	0.708454	141	TG	156.354	0.2026	4096	410877
phecode-508-both_sexes	Pulmonary collapse; interstitial and compensatory emphysema	-0.0931393	0.0505824	0.0676885	-0.0663128	0.0885134	0.455013	-0.0972477	0.0897038	0.280185	141	TG	104.365	0.9937	3027	404684
icd10-F81-both_sexes	F81 Specific developmental disorders of scholastic skills	-0.423941	0.230269	0.0677278	-1.07076	0.397459	0.0079298	-0.514247	0.357213	0.152211	141	TG	154.484	0.2333	212	420319
phecode-315.1-both_sexes	Learning disorder	-0.424479	0.230566	0.0677341	-1.07197	0.397985	0.00794172	-0.51536	0.36518	0.160389	141	TG	154.7	0.2298	212	419655
phecode-338.1-both_sexes	Acute pain	0.266673	0.144983	0.0679828	0.150872	0.253425	0.552589	0.272105	0.237535	0.253941	141	TG	134.979	0.6438	472	419595
categorical-20002-both_sexes-1134	Non-cancer illness code, self-reported	0.391189	0.212747	0.0680705	0.340915	0.372346	0.361469	0.548304	0.330514	0.0993662	141	TG	158.61	0.1696	258	420215
phecode-713-both_sexes	Arthropathy associated with other disorders classified elsewhere	0.364002	0.19836	0.06862	0.147546	0.346409	0.670817	0.441977	0.345783	0.203297	141	TG	131.586	0.7178	245	372332
phecode-394.3-both_sexes	Aortic valve disease	0.172772	0.0941809	0.0687078	0.383242	0.163403	0.0204218	0.225272	0.129925	0.0851444	141	TG	199.311	0.0008	1668	400902
categorical-6016-both_sexes-6016	Chest pain felt outside physical activity	0.146779	0.0801427	0.0691564	0.25332	0.139744	0.0720285	0.154326	0.129908	0.236857	141	TG	158.659	0.1695	1890	59789
icd10-G24-both_sexes	G24 Dystonia	-0.354095	0.193565	0.0694769	-0.0806752	0.337463	0.811408	-0.248491	0.291973	0.39618	141	TG	168.974	0.0664	331	420200
categorical-20002-both_sexes-1571	Non-cancer illness code, self-reported	-0.157276	0.0862396	0.0703296	0.053656	0.149133	0.719552	-0.0391909	0.127412	0.758851	141	TG	164.478	0.0999	1632	418841
icd10-M84-both_sexes	M84 Disorders of continuity of bone	0.411394	0.225664	0.0704317	0.0254835	0.392969	0.948388	0.349057	0.332553	0.295699	141	TG	178.829	0.0203	258	420273
categorical-6152-both_sexes-6	Blood clot, DVT, bronchitis, emphysema, asthma, rhinitis, eczema, allergy diagnosed by doctor	-0.0824999	0.0452687	0.0705205	-0.0326312	0.079118	0.680655	-0.16484	0.0670969	0.0152436	141	TG	182.683	0.0126	7151	412617
phecode-752.2-both_sexes	Other specified congenital anomalies of nervous system	-0.437659	0.240496	0.0709233	-0.197695	0.420507	0.638995	-0.168539	0.40765	0.679916	141	TG	129.417	0.7633	165	419889
phecode-476-both_sexes	Allergic rhinitis	-0.127517	0.0702547	0.0716532	-0.0349237	0.122549	0.776086	-0.12827	0.125404	0.308143	141	TG	102.231	0.9954	1531	398757
phecode-571.81-both_sexes	Portal hypertension	-0.235193	0.130184	0.0729691	0.0405457	0.226335	0.858089	-0.212856	0.198794	0.28613	141	TG	166.513	0.0839	725	408402
phecode-433.12-both_sexes	Cerebral atherosclerosis	0.32177	0.178673	0.0738728	0.432785	0.312412	0.168179	0.043289	0.287312	0.880454	141	TG	151.763	0.2861	348	407633
phecode-182-females	Malignant neoplasm of uterus	-0.15515	0.0861696	0.0739312	-0.111659	0.150735	0.460087	-0.156897	0.141504	0.269425	141	TG	155.403	0.2179	1553	198791
icd10-O36-both_sexes	O36 Maternal care for other known or suspected foetal problems	-0.145682	0.0809783	0.0741694	0.139493	0.138604	0.315964	-0.0392606	0.121112	0.746295	141	TG	161.12	0.1355	1891	418640
icd10-M30-both_sexes	M30 Polyarteritis nodosa and related conditions	0.570938	0.318242	0.0749654	0.550154	0.556682	0.324736	0.478465	0.498261	0.338574	141	TG	152.761	0.2647	102	420429
icd10-N60-both_sexes	N60 Benign mammary dysplasia	0.141138	0.0786808	0.0750028	-0.00351816	0.136882	0.979532	0.0757207	0.121343	0.533627	141	TG	165.16	0.0937	1970	418561
phecode-380-both_sexes	Disorders of external ear	-0.198799	0.110987	0.0754245	-0.285555	0.194068	0.143438	-0.124138	0.167462	0.459758	141	TG	196.17	0.0015	1170	418820
phecode-635.2-females	Antepartum hemorrhage, abruptio placentae, and placenta previa	-0.186122	0.103983	0.0756262	-0.275141	0.181759	0.132354	-0.187176	0.172529	0.279831	141	TG	130.163	0.7477	910	219979
categorical-20002-both_sexes-1545	Non-cancer illness code, self-reported	-0.245248	0.137021	0.075638	-0.46604	0.238628	0.0528283	-0.223467	0.27198	0.412685	141	TG	92.9682	0.9995	364	420109
phecode-464-both_sexes	Acute sinusitis	-0.367655	0.205496	0.0757603	-1.15996	0.350158	0.00117802	-0.549771	0.344945	0.113237	141	TG	131.724	0.7166	229	417499
icd10-D37-both_sexes	D37 Neoplasm of uncertain or unknown behaviour of oral cavity and digestive organs	0.151709	0.0848892	0.0760778	0.000638155	0.147776	0.996561	0.137252	0.13873	0.324202	141	TG	137.291	0.5898	1411	419120
phecode-316-both_sexes	Substance addiction and disorders	-0.0786875	0.0440503	0.0762136	-0.113498	0.0771173	0.143346	-0.0801742	0.0694913	0.250577	141	TG	168.614	0.0688	6766	392046
categorical-20002-both_sexes-1200	Non-cancer illness code, self-reported	0.3034	0.170047	0.0765547	0.0890243	0.296782	0.764652	0.133734	0.299937	0.656378	141	TG	111.174	0.976	283	420190
phecode-561-both_sexes	Symptoms involving digestive system	0.0452932	0.0254068	0.0767989	0.0126396	0.044338	0.776012	0.0775536	0.0388706	0.0479648	141	TG	162.722	0.1163	20227	330270
categorical-20002-both_sexes-1322	Non-cancer illness code, self-reported	-0.512483	0.287585	0.0769134	-0.475142	0.503344	0.346823	-0.432638	0.424479	0.309857	141	TG	172.648	0.0433	152	420321
icd10-X51-both_sexes	X51 Travel and motion	-0.528445	0.29678	0.0771477	-1.47078	0.509765	0.00453564	-0.660644	0.428058	0.125002	141	TG	160.882	0.139	134	420397
categorical-20001-both_sexes-1017	Cancer code, self-reported	-0.46437	0.261347	0.0777668	0.237356	0.45152	0.599946	-0.0719483	0.403625	0.85878	141	TG	172.756	0.0432	185	420288
phecode-701.6-both_sexes	Acquired acanthosis nigricans	-0.526432	0.296323	0.077814	-0.208639	0.517438	0.68741	-0.399525	0.443087	0.368772	141	TG	159.166	0.1627	133	413923
phecode-564-both_sexes	Functional digestive disorders	0.0312169	0.0175783	0.0779261	0.00185091	0.0306231	0.951891	0.0287204	0.0287309	0.319212	141	TG	137.554	0.5841	38999	330270
icd10-I34-both_sexes	I34 Nonrheumatic mitral valve disorders	0.108978	0.0615111	0.0786241	0.322685	0.105378	0.00263879	0.115113	0.0950845	0.228076	141	TG	161.315	0.1339	3153	417378
phecode-681.3-both_sexes	Cellulitis and abscess of arm/hand	-0.0801264	0.04537	0.0795643	-0.00971127	0.079093	0.902456	0.0152791	0.0636657	0.810689	141	TG	185.451	0.0099	6883	406937
phecode-705.8-both_sexes	Hyperhidrosis	0.22594	0.128032	0.0797937	0.39753	0.223505	0.0774888	0.407345	0.197917	0.041429	141	TG	163.655	0.1071	733	409787
phecode-870.4-both_sexes	Open wound of nose and sinus	-0.335041	0.189955	0.0800628	-0.185586	0.329675	0.574434	-0.445112	0.302835	0.143973	134	TG	139.714	0.3766	305	400468
phecode-350.1-both_sexes	Abnormal involuntary movements	-0.156319	0.088889	0.0808328	0.00711154	0.154698	0.9634	-0.106563	0.143606	0.459301	141	TG	130.66	0.7378	1221	415922
icd10-T80-both_sexes	T80 Complications following infusion, transfusion and therapeutic injection	0.317197	0.180604	0.0812229	0.190428	0.315883	0.547596	0.131452	0.297714	0.659504	141	TG	147.939	0.3563	332	420199
icd10-S30-both_sexes	S30 Superficial injury of abdomen, lower back and pelvis	0.217238	0.123836	0.0815775	-0.015156	0.215465	0.944023	0.163233	0.200751	0.417535	141	TG	157.408	0.1871	758	419773
phecode-364-both_sexes	Corneal opacity and other disorders of cornea	-0.196164	0.111834	0.0816091	0.0218905	0.194445	0.910527	-0.268887	0.171521	0.119219	141	TG	160.585	0.143	951	404535
phecode-389.2-both_sexes	Conductive hearing loss	-0.278314	0.158945	0.0821356	-0.222459	0.278282	0.425422	-0.223447	0.243897	0.361163	141	TG	178.697	0.0209	519	414345
icd10-E07-both_sexes	E07 Other disorders of thyroid	-0.268238	0.153362	0.0824731	0.0214898	0.266595	0.935869	0.0724097	0.235028	0.758472	141	TG	155.985	0.2078	487	420044
phecode-596-both_sexes	Other disorders of bladder	-0.0612027	0.0350377	0.0828704	-0.179697	0.0600978	0.00329979	-0.107524	0.0525905	0.0427736	141	TG	180.275	0.0168	11530	403310
phecode-520-both_sexes	Disorders of tooth development	-0.112219	0.0642512	0.0829057	-0.24276	0.111722	0.0314836	-0.14081	0.100952	0.165278	141	TG	144.751	0.4197	2625	408157
icd10-O62-both_sexes	O62 Abnormalities of forces of labour	-0.293829	0.168241	0.0829221	-0.205766	0.294386	0.48574	-0.190089	0.263645	0.47211	141	TG	165.682	0.0895	439	420092
phecode-750.13-both_sexes	Congenital anomalies of mouth/tongue	0.325623	0.186771	0.0834523	0.105152	0.326277	0.747726	0.366166	0.31139	0.241628	141	TG	112.062	0.9721	238	417905
icd10-K58-both_sexes	K58 Irritable bowel syndrome	0.0725576	0.0416644	0.0837964	0.0226055	0.0727346	0.756423	0.115112	0.0620949	0.0658712	141	TG	157.303	0.1864	6923	413608
phecode-535.1-both_sexes	Acute gastritis	-0.135054	0.077585	0.0839285	-0.281891	0.135019	0.0386418	-0.13978	0.137311	0.310445	141	TG	116.266	0.9472	1447	379860
phecode-253.1-both_sexes	Pituitary hyperfunction	-0.277688	0.159575	0.0840255	-0.0386514	0.278266	0.88973	-0.024529	0.267942	0.92719	141	TG	151.915	0.2804	438	415877
icd10-O64-both_sexes	O64 Obstructed labour due to malposition and malpresentation of foetus	0.299753	0.172381	0.0842514	0.220687	0.30162	0.4656	0.427095	0.261151	0.104205	141	TG	168.118	0.0726	421	420110
icd10-S13-both_sexes	S13 Dislocation, sprain and strain of joints and ligaments at neck level	-0.444335	0.255631	0.0843756	0.306152	0.440588	0.488296	0.172666	0.408502	0.673176	141	TG	154.367	0.236	173	420358
phecode-480.2-both_sexes	Viral pneumonia	0.555176	0.319881	0.0848402	1.50801	0.551866	0.00710104	1.12673	0.515962	0.0306469	141	TG	140.323	0.5202	101	405999
phecode-348.2-both_sexes	Cerebral edema and compression of brain	0.296234	0.170851	0.085142	0.109759	0.298259	0.713433	0.153082	0.277038	0.581441	141	TG	138.03	0.5742	349	403249
phecode-193-both_sexes	Thyroid cancer	-0.255179	0.147288	0.085383	-0.270945	0.257838	0.295159	-0.151385	0.25542	0.554345	141	TG	125.811	0.8295	427	418625
phecode-573.5-both_sexes	Jaundice (not of newborn)	-0.207159	0.119856	0.0861226	-0.287839	0.209649	0.171977	-0.161447	0.170553	0.345469	141	TG	215.393	0.0001	1104	408402
phecode-1007-both_sexes	Injury to blood vessels	0.303482	0.175592	0.0861331	0.0246435	0.306016	0.935931	0.16429	0.27927	0.557289	141	TG	135.588	0.6289	324	420207
icd10-N73-both_sexes	N73 Other female pelvic inflammatory diseases	-0.104006	0.0602101	0.086303	-0.18423	0.105035	0.0816359	-0.102455	0.0927088	0.271002	141	TG	149.34	0.3288	3104	417427
phecode-800.4-both_sexes	Fracture of patella	-0.271567	0.15748	0.0868332	-0.272923	0.276018	0.324484	-0.109187	0.236676	0.645275	141	TG	150.727	0.303	452	395047
icd10-S68-both_sexes	S68 Traumatic amputation of wrist and hand	-0.257509	0.149641	0.0874869	-0.072817	0.261208	0.780836	-0.223554	0.225773	0.323799	141	TG	148.91	0.3379	492	420039
phecode-213-both_sexes	Benign neoplasm of bone and articular cartilage	-0.259427	0.150898	0.0877844	-0.000482776	0.262878	0.998537	-0.150944	0.26784	0.573954	141	TG	112.461	0.9694	363	377237
phecode-502-both_sexes	Postinflammatory pulmonary fibrosis	-0.161231	0.0938459	0.0880004	0.0139811	0.163314	0.931901	-0.286125	0.150637	0.0595649	141	TG	148.654	0.3423	1265	404684
icd10-I33-both_sexes	I33 Acute and subacute endocarditis	0.332719	0.193866	0.0883318	-0.119494	0.336025	0.722672	0.0838609	0.310222	0.787308	141	TG	140.65	0.5125	275	420256
phecode-575-both_sexes	Other biliary tract disease	-0.10085	0.0587507	0.0884019	-0.20129	0.101057	0.0484671	-0.153453	0.0797885	0.0566029	133	TG	213.688	0.0001	5097	399542
phecode-110-both_sexes	Dermatophytosis / Dermatomycosis	-0.298279	0.173861	0.0884441	-0.210369	0.30414	0.490289	-0.242215	0.272685	0.375924	141	TG	150.733	0.303	369	416798
categorical-20002-both_sexes-1080	Non-cancer illness code, self-reported	-0.40705	0.237284	0.0884749	0.00755512	0.413425	0.985446	-0.184147	0.355287	0.605065	141	TG	178.458	0.0212	232	420241
categorical-20002-both_sexes-1634	Non-cancer illness code, self-reported	-0.218563	0.127491	0.0886787	-0.0450229	0.2222	0.839726	-0.171381	0.175487	0.330451	141	TG	193.167	0.0031	878	419595
icd10-F23-both_sexes	F23 Acute and transient psychotic disorders	-0.460994	0.269093	0.0888997	0.0446463	0.467898	0.92412	-0.563277	0.380391	0.140911	141	TG	168.612	0.0686	164	420367
phecode-564.1-both_sexes	Irritable Bowel Syndrome	0.0703042	0.0410526	0.0890113	0.0386699	0.0717792	0.590932	0.113529	0.0630324	0.0738373	141	TG	152.82	0.2614	6993	330270
phecode-253.7-both_sexes	Other disorders of neurohypophysis	-0.404749	0.236388	0.0890699	-0.196357	0.413267	0.635438	0.0180871	0.365535	0.960606	141	TG	176.138	0.0291	231	415877
phecode-339-both_sexes	Other headache syndromes	0.0688444	0.0402142	0.0891215	0.183493	0.0694006	0.00913579	0.0584149	0.0589415	0.323363	141	TG	204.916	0.0002	9697	407934
icd10-Z94-both_sexes	Z94 Transplanted organ and tissue status	-0.147819	0.0863563	0.0891604	-0.205655	0.151055	0.175571	-0.11087	0.143265	0.440307	141	TG	129.355	0.764	1278	419253
icd10-B25-both_sexes	B25 Cytomegaloviral disease	-0.497224	0.29054	0.0892255	0.402772	0.499787	0.421685	-0.404989	0.426706	0.344203	141	TG	170.238	0.0586	148	420383
phecode-362.3-both_sexes	Other nondiabetic retinopathy	-0.397638	0.232578	0.0895375	-0.0317809	0.40512	0.937584	-0.0318334	0.366652	0.930937	141	TG	144.487	0.4257	196	404535
phecode-415.21-both_sexes	Primary pulmonary hypertension	-0.251746	0.147269	0.0895865	0.0936368	0.255173	0.714211	-0.0747165	0.232267	0.748172	141	TG	153.152	0.2574	520	411769
phecode-450-both_sexes	Noninfectious disorders of lymphatic channels	-0.160835	0.0941756	0.0898864	-0.208114	0.164736	0.20859	0.036906	0.165947	0.82433	141	TG	121.969	0.8873	1013	419518
phecode-246-both_sexes	Other disorders of thyroid	-0.26886	0.157549	0.0901298	0.0661306	0.273392	0.809223	-0.0601482	0.237195	0.800191	141	TG	168.778	0.0684	499	399034
phecode-555-both_sexes	Inflammatory bowel disease and other gastroenteritis and colitis	0.0984079	0.057723	0.0904438	0.0380199	0.100852	0.706758	-0.0167813	0.0783799	0.830779	141	TG	223.707	0.0001	5183	330270
phecode-370.1-both_sexes	Corneal ulcer	-0.379372	0.222913	0.090997	-0.375129	0.390371	0.338243	-0.701366	0.379449	0.0666572	141	TG	126.483	0.8173	187	409073
phecode-741-both_sexes	Symptoms and disorders of the joints	0.10555	0.0620896	0.0913595	0.168448	0.108523	0.122891	0.133639	0.0885683	0.133584	141	TG	195.609	0.0019	3789	413456
icd10-A40-both_sexes	A40 Streptococcal septicaemia	0.285048	0.167707	0.0914117	0.525267	0.292515	0.0747159	0.451315	0.268379	0.0948692	141	TG	138.428	0.5659	362	420169
categorical-20002-both_sexes-1437	Non-cancer illness code, self-reported	-0.537065	0.316292	0.0917286	0.239693	0.547778	0.662375	-0.431131	0.494958	0.38522	141	TG	158.106	0.1762	116	420357
phecode-191-both_sexes	Manlignant and unknown neoplasms of brain and nervous system	0.18697	0.110181	0.0919303	0.0691092	0.192466	0.720085	0.103547	0.182556	0.571481	141	TG	144.346	0.4292	876	418389
icd10-E80-both_sexes	E80 Disorders of porphyrin and bilirubin metabolism	0.239117	0.140952	0.0920245	0.352961	0.246409	0.154269	0.233723	0.229657	0.310573	141	TG	137.002	0.5969	504	420027
phecode-715.1-both_sexes	Sacroiliitis NEC	-0.41372	0.244168	0.0924114	0.326466	0.420778	0.439147	-0.266917	0.393248	0.498418	141	TG	118.836	0.9238	147	371238
categorical-20002-both_sexes-1459	Non-cancer illness code, self-reported	-0.172493	0.101941	0.0928537	-0.056605	0.178022	0.750987	-0.234418	0.158538	0.141487	141	TG	152.326	0.2723	1089	419384
icd10-J10-both_sexes	J10 Influenza due to identified influenza virus	0.302646	0.179057	0.0932108	0.11606	0.313074	0.711417	0.200618	0.306056	0.513224	141	TG	147.549	0.3658	336	420195
phecode-473.1-both_sexes	Chronic laryngitis	-0.523612	0.310216	0.0936574	-0.372224	0.543455	0.494534	-0.715871	0.5168	0.168195	141	TG	142.902	0.4614	108	398757
icd10-R19-both_sexes	R19 Other symptoms and signs involving the digestive system and abdomen	0.0410519	0.0243385	0.0938867	-0.0145616	0.0422088	0.730624	0.064883	0.0388446	0.0970896	141	TG	144.095	0.4347	19142	401389
icd10-K01-both_sexes	K01 Embedded and impacted teeth	-0.122915	0.0728735	0.0938897	-0.245714	0.126902	0.0548668	-0.130848	0.117396	0.266939	141	TG	143.23	0.4533	2022	418509
icd10-W26-both_sexes	W26 Contact with knife, sword or dagger	0.250642	0.148684	0.0940754	0.534674	0.2586	0.0405351	0.347665	0.222518	0.120449	141	TG	162.949	0.1145	546	419985
icd10-O00-both_sexes	O00 Ectopic pregnancy	-0.0897254	0.0532336	0.0941189	0.00885601	0.0926304	0.923971	-0.00369772	0.0945252	0.968851	141	TG	120.853	0.902	291	420240
phecode-732-both_sexes	Osteochondropathies	-0.225146	0.133871	0.0948357	-0.211108	0.234272	0.369082	-0.241155	0.209669	0.252036	141	TG	144.814	0.4188	594	397835
categorical-20002-both_sexes-1578	Non-cancer illness code, self-reported	-0.442874	0.263701	0.0952942	-0.447099	0.460862	0.333663	-0.442048	0.419733	0.294079	141	TG	140.805	0.5082	149	420324
phecode-717-both_sexes	Polymyalgia Rheumatica	0.174462	0.103978	0.0956018	0.415006	0.180266	0.0228104	0.149549	0.129945	0.25175	141	TG	245.243	0.0001	1700	418831
categorical-20002-both_sexes-1223	Non-cancer illness code, self-reported	-0.130263	0.0777248	0.0959802	-0.390197	0.133353	0.00401123	-0.102801	0.105521	0.331625	141	TG	215.362	0.0001	2698	417775
phecode-199.4-both_sexes	Neurofibromatosis	0.506513	0.302922	0.0967402	0.645441	0.529953	0.225317	0.357265	0.479587	0.457555	141	TG	137.302	0.5905	104	367856
phecode-443.1-both_sexes	Raynaud's syndrome	-0.17496	0.104692	0.096919	0.260402	0.177614	0.144876	-0.0413493	0.133555	0.757322	141	TG	221.708	0.0001	1510	408565
phecode-740.12-both_sexes	Osteoarthrosis, localized, secondary	0.268597	0.160982	0.0974543	0.476578	0.280857	0.0919589	0.197641	0.245786	0.422691	141	TG	151.024	0.2973	429	384458
icd10-N87-both_sexes	N87 Dysplasia of cervix uteri	0.136372	0.0818127	0.0977727	0.0960064	0.14297	0.503006	0.101161	0.126797	0.426328	141	TG	142.74	0.4653	1579	418952
categorical-20002-both_sexes-1542	Non-cancer illness code, self-reported	0.221404	0.133011	0.098238	0.243985	0.232495	0.295805	-0.0479212	0.213238	0.822516	141	TG	149.252	0.3311	618	419855
categorical-20544-both_sexes-7	Mental health problems ever diagnosed by a professional	0.174653	0.105033	0.0985811	-0.0641721	0.181955	0.724862	0.0569129	0.176173	0.747138	141	TG	123.992	0.8558	840	135111
icd10-R76-both_sexes	R76 Other abnormal immunological findings in serum	-0.303321	0.182442	0.0986379	-0.333055	0.319437	0.298929	-0.243481	0.288952	0.400869	141	TG	131.085	0.7288	289	420242
phecode-189-both_sexes	Cancer of urinary organs (incl. kidney and bladder)	0.0928386	0.0558706	0.0988162	-0.147141	0.094562	0.121977	0.0174012	0.0777218	0.823169	141	TG	209.727	0.0001	5100	415431
icd10-C67-both_sexes	C67 Malignant neoplasm of bladder	0.115067	0.0692623	0.0988856	-0.0394336	0.120114	0.743177	0.103259	0.105023	0.327204	141	TG	164.148	0.1021	2576	417955
phecode-585.2-both_sexes	Renal failure NOS	-0.11887	0.0716061	0.0991422	-0.135299	0.125369	0.282367	-0.221146	0.123285	0.0750063	141	TG	115.816	0.9509	1676	401927
categorical-20002-both_sexes-1267	Non-cancer illness code, self-reported	-0.215213	0.129802	0.0995551	-0.231763	0.227221	0.309506	-0.21817	0.209154	0.298697	141	TG	152.364	0.2706	665	419808
icd10-N39-both_sexes	N39 Other disorders of urinary system	0.0461815	0.0278599	0.0996301	-0.00367583	0.0484994	0.939694	0.0218304	0.0354831	0.5394	141	TG	221.057	0.0001	23043	397488
phecode-687.2-both_sexes	Localized superficial swelling, mass, or lump	0.121621	0.0733929	0.0997335	0.0871073	0.128429	0.49874	0.112747	0.108336	0.299802	141	TG	179.768	0.0179	2465	411745
icd10-R68-both_sexes	R68 Other general symptoms and signs	-0.24568	0.148388	0.100032	0.00289115	0.258489	0.991092	-0.220951	0.229205	0.336715	141	TG	164.598	0.0984	553	419978
categorical-20001-both_sexes-1052	Cancer code, self-reported	-0.285953	0.172827	0.100255	-0.144413	0.302099	0.633378	-0.388079	0.263068	0.142403	141	TG	160.531	0.1424	396	420077
icd10-R03-both_sexes	R03 Abnormal blood-pressure reading, without diagnosis	-0.107538	0.0651442	0.101029	0.0743333	0.112462	0.509729	-0.115583	0.0900846	0.201594	141	TG	183.702	0.0112	3235	417296
icd10-J93-both_sexes	J93 Pneumothorax	-0.171934	0.10424	0.101309	-0.0885896	0.182344	0.627847	-0.253192	0.174205	0.148347	141	TG	157.931	0.1783	1065	419466
icd10-C18-both_sexes	C18 Malignant neoplasm of colon	-0.0918544	0.0557143	0.101458	-0.0537265	0.0974707	0.582377	-0.00967851	0.0845097	0.908985	141	TG	153.036	0.2586	3759	416772
icd10-Z63-both_sexes	Z63 Other problems related to primary support group, including family circumstances	0.208422	0.126458	0.101563	0.142886	0.221328	0.519612	0.195922	0.220741	0.376296	141	TG	127.625	0.7973	583	419948
phecode-656-both_sexes	Other perinatal conditions of fetus or newborn	-0.438629	0.266426	0.101936	-0.908284	0.463537	0.0520595	-0.432237	0.388638	0.267965	141	TG	178.015	0.022	184	420347
icd10-Q38-both_sexes	Q38 Other congenital malformations of tongue, mouth and pharynx	0.314853	0.191267	0.101977	-0.00873341	0.333265	0.979131	0.329274	0.320622	0.3062	141	TG	121.092	0.8984	245	420286
categorical-20002-both_sexes-1532	Non-cancer illness code, self-reported	-0.299353	0.181874	0.10202	-0.691613	0.315487	0.0300288	-0.153179	0.285532	0.592487	141	TG	163.734	0.1077	363	420110
phecode-526.5-both_sexes	Inflammatory conditions of jaw	-0.410002	0.249701	0.102841	-0.0925471	0.436252	0.832308	-0.454193	0.444934	0.309105	141	TG	116.179	0.9477	137	408157
icd10-M17-both_sexes	M17 Gonarthrosis [arthrosis of knee]	-0.0539061	0.0328386	0.102928	0.0166499	0.0570033	0.770656	-0.0377463	0.0384079	0.327414	141	TG	312.784	0.0001	24753	395778
categorical-20002-both_sexes-1372	Non-cancer illness code, self-reported	-0.405396	0.247264	0.103349	-0.189476	0.432124	0.661721	-0.205787	0.389563	0.598162	141	TG	139.861	0.5316	168	420305
phecode-279.7-both_sexes	Other immunological findings	-0.308856	0.188483	0.103533	-0.328148	0.330018	0.321788	-0.252838	0.299587	0.400134	141	TG	135.884	0.6248	281	419926
icd10-S20-both_sexes	S20 Superficial injury of thorax	-0.246345	0.150445	0.103783	-0.387154	0.263103	0.143419	-0.213725	0.230925	0.35629	141	TG	154.944	0.2252	506	420025
phecode-758-both_sexes	Chromosomal anomalies and genetic disorders	0.388707	0.237648	0.104161	0.734257	0.414135	0.0784208	0.57921	0.408155	0.158094	141	TG	135.971	0.622	176	419140
icd10-H57-both_sexes	H57 Other disorders of eye and adnexa	-0.190718	0.116721	0.104514	-0.47877	0.202105	0.0192158	-0.274296	0.206666	0.186588	141	TG	112.34	0.9701	611	419920
phecode-781-both_sexes	Symptoms involving nervous and musculoskeletal systems	-0.0617276	0.0378222	0.104918	-0.0368544	0.0661886	0.578554	-0.0564309	0.0566032	0.320506	141	TG	171.82	0.0481	9175	411353
categorical-20001-both_sexes-1030	Cancer code, self-reported	0.445136	0.272802	0.104987	-0.362071	0.470068	0.442457	0.510535	0.470056	0.279294	141	TG	128.748	0.7768	127	420346
icd10-O61-both_sexes	O61 Failed induction of labour	0.144137	0.0883415	0.105013	-0.0243435	0.153662	0.874354	-0.0378537	0.111725	0.73526	141	TG	300.837	0.0001	154	420377
categorical-20002-both_sexes-1222	Non-cancer illness code, self-reported	-0.518687	0.317996	0.105114	-0.345528	0.555502	0.534954	-0.294022	0.26766	0.273876	141	TG	493.041	0.0001	363	420110
phecode-974-both_sexes	Poisoning by water, mineral, and uric acid metabolism drugs	0.427072	0.261949	0.105272	0.0505386	0.457157	0.912133	0.485218	0.421885	0.252056	141	TG	141.872	0.4849	152	383239
icd10-U51-both_sexes	U51 Admission status on psychiatric patients	0.437632	0.268457	0.105312	0.39854	0.47003	0.397949	0.449925	0.398983	0.261385	141	TG	167.358	0.0779	169	420362
icd10-T87-both_sexes	T87 Complications peculiar to reattachment and amputation	0.35279	0.216927	0.106134	0.0668274	0.37847	0.860101	0.485339	0.361115	0.181122	141	TG	128.408	0.7823	200	420331
phecode-415-both_sexes	Pulmonary heart disease	-0.0872839	0.0536756	0.106169	-0.0327113	0.0937758	0.727749	-0.0400822	0.0755184	0.596425	141	TG	204.282	0.0003	5421	411769
phecode-366.3-both_sexes	Traumatic cataract	-0.523322	0.32185	0.106203	-0.723399	0.562746	0.200762	-0.771038	0.496041	0.12235	141	TG	169.204	0.0647	120	392711
categorical-20544-both_sexes-11	Mental health problems ever diagnosed by a professional	0.0432329	0.0265944	0.106275	-0.0218235	0.0460173	0.636069	0.0295442	0.0374065	0.430972	141	TG	207.688	0.0001	29078	106948
phecode-202.24-both_sexes	Large cell lymphoma	-0.231926	0.14279	0.106573	0.243885	0.244973	0.321195	-0.00906774	0.191261	0.962254	141	TG	210.289	0.0001	761	414840
categorical-20002-both_sexes-1229	Non-cancer illness code, self-reported	0.429476	0.264501	0.106685	0.117901	0.46179	0.798859	0.239368	0.427113	0.57608	141	TG	133.965	0.6692	141	420332
icd10-D58-both_sexes	D58 Other hereditary haemolytic anaemias	-0.431848	0.266533	0.107431	0.310853	0.460061	0.500368	-0.167855	0.462553	0.717235	141	TG	119.226	0.921	120	420411
categorical-20002-both_sexes-1478	Non-cancer illness code, self-reported	0.0793061	0.0489505	0.107455	0.0427696	0.0856357	0.618262	0.106764	0.0910041	0.242717	141	TG	96.8587	0.999	3044	417429
phecode-598-both_sexes	Abnormal findings on examination of urine	0.103399	0.0638264	0.107482	-0.107562	0.109614	0.328158	-0.019656	0.082301	0.811586	141	TG	225.601	0.0001	4156	416375
phecode-191.1-both_sexes	Cancer of brain and nervous system	0.204731	0.126378	0.107486	0.0669999	0.220784	0.76199	0.293726	0.199462	0.143107	141	TG	157.213	0.1885	724	418389
categorical-20002-both_sexes-1384	Non-cancer illness code, self-reported	-0.49696	0.306797	0.107518	0.823958	0.519565	0.115043	0.352528	0.494745	0.477314	141	TG	162.711	0.1173	127	420346
icd10-K12-both_sexes	K12 Stomatitis and related lesions	0.148147	0.0914649	0.107543	0.141337	0.160141	0.378986	0.146516	0.165305	0.376957	141	TG	124.711	0.8443	1095	419436
phecode-291.1-both_sexes	Transient mental disorders due to conditions classified elsewhere	-0.429797	0.265997	0.10839	0.112086	0.462057	0.808688	-0.561454	0.390799	0.153039	141	TG	166.675	0.0821	165	410833
categorical-20002-both_sexes-1196	Non-cancer illness code, self-reported	0.115319	0.0714752	0.108907	0.108422	0.125121	0.38769	0.0840632	0.118279	0.478441	141	TG	135.501	0.6313	1960	418513
phecode-573.2-both_sexes	Liver replaced by transplant	-0.503792	0.31229	0.108949	-0.995891	0.545983	0.070295	-0.139254	0.5044	0.782894	141	TG	156.113	0.2062	118	408402
icd10-C09-both_sexes	C09 Malignant neoplasm of tonsil	0.371693	0.230553	0.109174	0.1295	0.403155	0.748529	0.549624	0.334126	0.102222	141	TG	189.003	0.0052	262	420269
phecode-117.4-both_sexes	Aspergillosis	-0.368021	0.228284	0.109189	0.0623663	0.397295	0.87549	-0.222713	0.351579	0.527463	141	TG	145.305	0.4089	205	416798
phecode-695.2-both_sexes	Bullous dermatoses	-0.519914	0.322507	0.109192	0.544853	0.553712	0.326826	-0.152555	0.407285	0.708551	141	TG	234.66	0.0001	166	412638
phecode-433.21-both_sexes	Cerebral artery occlusion, with cerebral infarction	0.116848	0.0725422	0.109602	0.280007	0.124851	0.0265825	0.0961846	0.123589	0.437796	134	TG	128.269	0.6509	1958	407633
phecode-474.2-both_sexes	Chronic tonsillitis and adenoiditis	0.171041	0.106227	0.109617	0.239152	0.186026	0.200727	0.266838	0.154556	0.0864664	141	TG	190.586	0.004	1251	398757
icd10-C24-both_sexes	C24 Malignant neoplasm of other and unspecified parts of biliary tract	0.350798	0.2179	0.109672	-0.409424	0.373243	0.274566	-0.251371	0.346278	0.469098	141	TG	131.634	0.7176	202	420329
icd10-Z11-both_sexes	Z11 Special screening examination for infectious and parasitic diseases	-0.188377	0.117547	0.111284	0.175475	0.202118	0.386793	-0.0184219	0.191451	0.923481	141	TG	142.546	0.469	759	419772
phecode-973-both_sexes	Poisoning by agents primarily affecting the gastrointestinal system	-0.358759	0.224046	0.11157	0.0657079	0.390484	0.866613	-0.67658	0.331788	0.0433118	141	TG	184.764	0.0103	270	383239
icd10-Z87-both_sexes	Z87 Personal history of other diseases and conditions	0.0295798	0.0184867	0.11184	0.0380992	0.0323472	0.240881	0.0344785	0.0302288	0.25599	141	TG	133.441	0.6809	32461	388070
icd10-W01-both_sexes	W01 Fall on same level from slipping, tripping and stumbling	-0.0685581	0.0429567	0.112748	-0.140557	0.0748313	0.0624328	-0.0932689	0.0630253	0.141156	141	TG	183.728	0.011	7628	412903
phecode-306.9-both_sexes	Tension headache	0.305297	0.191381	0.112915	0.341697	0.335085	0.309627	0.519122	0.268266	0.0549943	141	TG	180.077	0.0175	365	369930
icd10-G95-both_sexes	G95 Other diseases of spinal cord	-0.185794	0.116497	0.113002	-0.211427	0.203963	0.301725	-0.190289	0.209735	0.365814	141	TG	139.917	0.5313	757	419774
phecode-535.6-both_sexes	Duodenitis	-0.0756305	0.0474575	0.113271	-0.0827584	0.0831219	0.321162	-0.00415358	0.0604709	0.945337	141	TG	263.394	0.0001	9104	379860
phecode-448-both_sexes	Disease of capillaries	0.183975	0.115479	0.113382	-0.165572	0.19907	0.406989	-0.077604	0.17589	0.659743	141	TG	149.367	0.3294	831	408565
phecode-634.3-females	Ectopic pregnancy	-0.292835	0.184033	0.113818	-0.27984	0.322537	0.387097	-0.0920318	0.28062	0.743433	141	TG	170	0.0606	372	219979
categorical-20002-both_sexes-1465	Non-cancer illness code, self-reported	-0.0349657	0.0220203	0.114569	0.0338623	0.0378824	0.372932	0.0333094	0.0305897	0.278066	141	TG	195.215	0.0022	35491	384982
phecode-189.2-both_sexes	Cancer of bladder	0.106207	0.0668934	0.114608	-0.0203326	0.116324	0.861497	0.0635502	0.097669	0.516326	141	TG	173.229	0.0409	2912	415431
icd10-B44-both_sexes	B44 Aspergillosis	-0.356839	0.224802	0.11469	0.0363951	0.391534	0.926073	-0.256591	0.366912	0.485508	141	TG	139.573	0.5378	203	420328
icd10-G04-both_sexes	G04 Encephalitis, myelitis and encephalomyelitis	0.374756	0.236156	0.114791	0.666138	0.412245	0.108388	0.420367	0.351056	0.233161	141	TG	166.416	0.0837	220	420311
icd10-N02-both_sexes	N02 Recurrent and persistent haematuria	0.164759	0.103852	0.114886	0.380001	0.180654	0.0372261	0.175507	0.184953	0.344293	141	TG	111.758	0.9731	766	419765
icd10-W51-both_sexes	W51 Striking against or bumped into by another person	-0.384484	0.242535	0.115161	-1.22198	0.415941	0.00387019	-0.808272	0.401692	0.0461206	141	TG	139.054	0.5513	173	420358
icd10-S00-both_sexes	S00 Superficial injury of head	-0.10161	0.0640999	0.115181	-0.00431444	0.111805	0.969273	-0.163183	0.0946696	0.0869678	141	TG	165.599	0.0901	3018	417513
icd10-F80-both_sexes	F80 Specific developmental disorders of speech and language	-0.47276	0.29824	0.115184	-0.394175	0.521937	0.451397	-0.418827	0.455979	0.359925	141	TG	144.008	0.4362	119	420412
phecode-315.2-both_sexes	Speech and language disorder	-0.472738	0.298259	0.115224	-0.395077	0.521961	0.450386	-0.418012	0.471973	0.377315	141	TG	144.033	0.4356	119	419655
phecode-671-females	Venous/cerebrovascular complications embolism in pregnancy and the puerperium	-0.326229	0.205911	0.115378	-0.331655	0.360404	0.359046	-0.295558	0.362197	0.415878	141	TG	120.746	0.9034	210	226973
icd10-R70-both_sexes	R70 Elevated erythrocyte sedimentation rate and abnormality of plasma viscosity	0.47013	0.296829	0.115486	-0.194639	0.514961	0.70603	0.507355	0.482189	0.294524	141	TG	132.159	0.7066	110	420421
categorical-20002-both_sexes-1275	Non-cancer illness code, self-reported	-0.165166	0.10429	0.115514	-0.0753967	0.182236	0.679708	-0.125872	0.182861	0.492373	141	TG	101.778	0.9956	694	419779
categorical-20001-both_sexes-1073	Cancer code, self-reported	-0.233893	0.147687	0.115515	0.308317	0.252237	0.22365	0.0276197	0.220208	0.900367	141	TG	173.332	0.04	585	419888
icd10-R87-both_sexes	R87 Abnormal findings in specimens from female genital organs	-0.149241	0.0942649	0.115629	-0.162099	0.164753	0.326877	-0.0772366	0.13796	0.576478	141	TG	178.136	0.0219	1487	419044
icd10-S99-both_sexes	S99 Other and unspecified injuries of ankle and foot	-0.441168	0.278729	0.115728	0.00896758	0.486218	0.985311	0.0486624	0.460408	0.915976	141	TG	138.628	0.5596	131	420400
categorical-20002-both_sexes-1525	Non-cancer illness code, self-reported	-0.449338	0.283957	0.115812	-0.647642	0.496083	0.193875	-0.901134	0.491447	0.0688319	141	TG	129.066	0.7707	117	420356
phecode-578-both_sexes	Gastrointestinal hemorrhage	0.0350901	0.0222027	0.116262	-0.0160637	0.0385081	0.677212	-0.00326221	0.0364753	0.928863	141	TG	154.288	0.2366	24945	390772
icd10-K45-both_sexes	K45 Other abdominal hernia	0.419224	0.265367	0.116412	0.699797	0.463589	0.133435	0.808135	0.396984	0.0436683	141	TG	148.126	0.3527	155	420376
icd10-N97-both_sexes	N97 Female infertility	-0.154768	0.0980769	0.116816	-0.226442	0.171588	0.189109	-0.266328	0.173171	0.126319	141	TG	128.011	0.7924	989	419542
icd10-D48-both_sexes	D48 Neoplasm of uncertain or unknown behaviour of other and unspecified sites	-0.191117	0.121424	0.117751	-0.274734	0.212314	0.197812	-0.199441	0.186425	0.286541	141	TG	174.257	0.0369	871	419660
phecode-375-both_sexes	Disorders of lacrimal system	0.0992209	0.063044	0.117782	0.0665752	0.110337	0.547239	0.153895	0.100995	0.129817	141	TG	144.544	0.4252	2699	410363
icd10-Q25-both_sexes	Q25 Congenital malformations of great arteries	0.468117	0.297512	0.117874	-0.0216244	0.517846	0.966751	0.53311	0.49379	0.282163	141	TG	134.044	0.6681	111	420420
icd10-Y60-both_sexes	Y60 Unintentional cut, puncture, perforation or haemorrhage during surgical and medical care	-0.167535	0.106576	0.118214	-0.0928931	0.186362	0.618951	-0.237643	0.180967	0.191269	141	TG	116.475	0.9453	760	419771
categorical-20001-both_sexes-1062	Cancer code, self-reported	-0.212573	0.13529	0.118386	-0.756515	0.230075	0.00127755	-0.564057	0.233482	0.0169878	141	TG	126.389	0.8193	510	419963
categorical-20002-both_sexes-1193	Non-cancer illness code, self-reported	-0.299402	0.190597	0.118472	-0.472433	0.333214	0.158485	-0.3093	0.341416	0.366528	141	TG	101.641	0.9957	206	420267
icd10-S76-both_sexes	S76 Injury of muscle and tendon at hip and thigh level	-0.248693	0.158329	0.118501	-0.0731797	0.276637	0.791761	-0.179866	0.271437	0.508649	141	TG	138.809	0.5561	406	420125
phecode-440.1-both_sexes	Atherosclerosis of renal artery	0.450447	0.286876	0.11863	0.786101	0.501323	0.119143	0.385954	0.450287	0.392838	141	TG	149.448	0.3264	134	408565
icd10-Q89-both_sexes	Q89 Other congenital malformations, not elsewhere classified	0.45388	0.289133	0.11872	0.714587	0.505024	0.159318	0.404252	0.452551	0.373244	141	TG	141.113	0.5011	124	420407
icd10-K38-both_sexes	K38 Other diseases of appendix	0.284082	0.18108	0.118947	-0.244135	0.312041	0.435322	0.0835416	0.291982	0.77521	141	TG	140.138	0.5236	314	420217
phecode-136-both_sexes	Other infectious and parasitic diseases	-0.297283	0.189521	0.118999	-0.571565	0.330514	0.0859718	-0.181312	0.296186	0.541428	141	TG	141.498	0.491	290	419830
phecode-740-both_sexes	Osteoarthrosis	-0.0429607	0.0274255	0.119501	0.0131457	0.047647	0.783036	-0.0200641	0.0332094	0.54671	141	TG	306.791	0.0001	36073	384458
phecode-965.3-both_sexes	Salicylates causing adverse effects in therapeutic use	0.21866	0.139626	0.119596	0.12967	0.244423	0.596601	0.397267	0.243372	0.104855	141	TG	122.881	0.8739	463	383239
phecode-401.22-both_sexes	Hypertensive chronic kidney disease	-0.129807	0.0829072	0.11968	-0.187346	0.145115	0.198839	-0.119237	0.124034	0.338049	141	TG	147.267	0.37	1612	325488
phecode-295-both_sexes	Schizophrenia and other psychotic disorders	-0.166857	0.106821	0.120541	-0.111718	0.186968	0.551129	-0.278159	0.163627	0.0913592	141	TG	164.526	0.0984	1067	369930
phecode-440.9-both_sexes	Atherosclerosis of aorta	0.250067	0.160193	0.120772	0.626839	0.277773	0.0255898	0.199242	0.254856	0.435662	141	TG	141.757	0.4855	407	408565
categorical-20002-both_sexes-1605	Non-cancer illness code, self-reported	-0.418332	0.268396	0.12134	-0.477847	0.468793	0.309824	0.0265697	0.461018	0.954123	141	TG	118.738	0.9255	120	420353
icd10-T47-both_sexes	T47 Poisoning by agents primarily affecting gastro-intestinal system	-0.507992	0.325954	0.121378	0.288911	0.565465	0.610213	-0.293346	0.489682	0.550105	141	TG	159.937	0.1519	110	420421
phecode-367.2-both_sexes	Astigmatism	-0.342876	0.220572	0.122325	-0.122991	0.385594	0.750233	-0.0890869	0.317022	0.779116	141	TG	187.447	0.0076	284	416775
icd10-W10-both_sexes	W10 Fall on and from stairs and steps	-0.0794579	0.0511268	0.12241	-0.146854	0.0892636	0.102195	-0.080142	0.0838206	0.340663	141	TG	127.333	0.804	3639	416892
categorical-20002-both_sexes-1230	Non-cancer illness code, self-reported	-0.509132	0.32782	0.122661	-0.338021	0.573376	0.556465	-0.158207	0.516753	0.759941	141	TG	150.737	0.3029	103	420370
phecode-041.2-both_sexes	Streptococcus infection	0.0989284	0.0637158	0.122764	0.0830384	0.11152	0.457768	0.0754763	0.114585	0.511175	141	TG	111.088	0.976	2020	401597
phecode-509.2-both_sexes	Respiratory insufficiency	-0.114687	0.0739093	0.122985	0.10665	0.127328	0.403696	-0.199213	0.109729	0.0715869	141	TG	195.247	0.0024	2690	404684
phecode-519.8-both_sexes	Other diseases of respiratory system, NEC	0.0507188	0.032688	0.123015	0.0432571	0.0572354	0.451062	0.0347105	0.0523427	0.508331	141	TG	157.902	0.1785	11538	407792
phecode-751.22-both_sexes	Other specified congenital anomalies of kidney	0.232654	0.150022	0.123206	0.132099	0.262317	0.61535	0.269237	0.243934	0.271605	141	TG	130.77	0.7341	427	417905
phecode-389.1-both_sexes	Sensorineural hearing loss	-0.22804	0.147164	0.123504	-0.041995	0.256891	0.870383	-0.140229	0.22112	0.527001	141	TG	183.393	0.0115	628	414345
categorical-20002-both_sexes-1289	Non-cancer illness code, self-reported	0.225959	0.145917	0.123749	0.330875	0.255398	0.197285	0.0472179	0.260936	0.856664	141	TG	131.759	0.7154	455	420018
icd10-I26-both_sexes	I26 Pulmonary embolism	-0.091465	0.05909	0.124042	-0.0644459	0.102146	0.529192	-0.00594389	0.0848833	0.94428	133	TG	198.108	0.0001	4685	415846
icd10-M41-both_sexes	M41 Scoliosis	0.211923	0.137026	0.12422	0.301868	0.239547	0.209723	0.284056	0.222173	0.203176	141	TG	150.88	0.3013	590	419941
icd10-I65-both_sexes	I65 Occlusion and stenosis of precerebral arteries, not resulting in cerebral infarction	0.142868	0.092488	0.124673	0.184692	0.161895	0.255911	0.156147	0.151832	0.305526	141	TG	145.074	0.414	1274	419257
phecode-282.9-both_sexes	Other hereditary hemolytic anemias	-0.406414	0.263141	0.124731	0.178569	0.456747	0.696426	-0.0224738	0.441862	0.959508	141	TG	122.199	0.8845	129	396365
icd10-T79-both_sexes	T79 Certain early complications of trauma, not elsewhere classified	-0.200832	0.13007	0.124838	-0.16215	0.227629	0.477445	-0.270348	0.227351	0.236405	141	TG	130.387	0.7428	566	419965
phecode-242.3-both_sexes	Exophthalmos	-0.539283	0.349269	0.124838	0.204296	0.606005	0.736536	-0.192548	0.407608	0.637387	141	TG	256.846	0.0001	155	399034
phecode-394.2-both_sexes	Mitral valve disease	0.125274	0.0812366	0.12531	0.164828	0.142155	0.248243	0.127276	0.136139	0.351449	141	TG	133.23	0.6855	1502	400902
categorical-20002-both_sexes-1263	Non-cancer illness code, self-reported	-0.546301	0.354334	0.125387	-0.401554	0.620257	0.518441	-0.283357	0.529972	0.59373	141	TG	178.351	0.0214	104	420369
phecode-627.2-females	Symptomatic menopause	0.321767	0.20874	0.12546	0.849303	0.361262	0.0201317	0.58413	0.364627	0.111411	141	TG	119.725	0.9152	201	194287
phecode-594.3-both_sexes	Calculus of ureter	0.119169	0.0775067	0.126421	-0.000107903	0.135177	0.999364	-0.0315922	0.102044	0.75733	141	TG	220.429	0.0001	2758	411207
icd10-W50-both_sexes	W50 Hit, struck, kicked, twisted, bitten or scratched by another person	-0.328066	0.213439	0.126538	-0.804925	0.370678	0.0315911	-0.255496	0.362245	0.481787	141	TG	128.886	0.7734	209	420322
categorical-20002-both_sexes-1639	Non-cancer illness code, self-reported	-0.252035	0.163982	0.126558	0.375464	0.279214	0.180907	-0.127494	0.268691	0.635882	141	TG	160.232	0.1485	432	420041
icd10-I27-both_sexes	I27 Other pulmonary heart diseases	-0.144398	0.0940172	0.126829	0.296041	0.15816	0.0633376	0.0889247	0.148327	0.549798	141	TG	141.613	0.4888	1200	419331
categorical-20002-both_sexes-1330	Non-cancer illness code, self-reported	-0.1106	0.0720134	0.126837	-0.123731	0.126005	0.327828	-0.0798392	0.10631	0.453909	141	TG	160.723	0.1401	2304	418169
icd10-K08-both_sexes	K08 Other disorders of teeth and supporting structures	0.0889835	0.0580451	0.127531	0.24214	0.100305	0.0170789	0.0703541	0.0966384	0.467821	141	TG	143.278	0.4545	3129	417402
categorical-20002-both_sexes-1278	Non-cancer illness code, self-reported	0.0700254	0.0456877	0.127607	0.138274	0.0795934	0.0845582	0.033151	0.0743554	0.656398	141	TG	161.539	0.1312	5819	414654
phecode-580.1-both_sexes	Glomerulonephritis	-0.160541	0.104843	0.127965	-0.25224	0.183245	0.170873	-0.101505	0.15638	0.517339	141	TG	160.528	0.1431	1083	401927
phecode-420.1-both_sexes	Myocarditis	-0.410924	0.269364	0.129382	-0.12669	0.470521	0.788133	-0.364209	0.450951	0.420664	141	TG	142.336	0.4744	144	416313
phecode-709.3-both_sexes	Systemic sclerosis	-0.388444	0.255108	0.130098	0.616378	0.434138	0.157912	-0.0383467	0.354876	0.914105	141	TG	196.175	0.002	221	411677
icd10-W79-both_sexes	W79 Inhalation and ingestion of food causing obstruction of respiratory tract	0.355435	0.234101	0.131195	0.255672	0.409982	0.5339	0.370243	0.406664	0.364156	141	TG	128.115	0.7879	172	420359
icd10-G25-both_sexes	G25 Other extrapyramidal and movement disorders	0.159497	0.105138	0.131516	0.302552	0.183412	0.101289	-0.0727277	0.169108	0.667809	141	TG	135.587	0.6295	907	419624
phecode-281.13-both_sexes	Folate-deficiency anemia	-0.30075	0.198557	0.132109	0.249389	0.343017	0.468419	-0.18331	0.315899	0.562657	141	TG	138.504	0.5623	259	396365
phecode-292.2-both_sexes	Mild cognitive impairment	0.28925	0.191149	0.132478	-0.0403776	0.333344	0.903764	0.42969	0.278756	0.125463	141	TG	158.723	0.1684	321	410833
phecode-250.1-both_sexes	Type 1 diabetes	-0.260016	0.172231	0.133374	-0.421915	0.300653	0.162749	-0.0725742	0.101782	0.47701	141	TG	1255.57	0.0001	3250	396181
icd10-E87-both_sexes	E87 Other disorders of fluid, electrolyte and acid-base balance	-0.0545711	0.0362186	0.134137	-0.110183	0.0631422	0.0831944	-0.143557	0.0596397	0.0173845	141	TG	137.14	0.5939	8097	412434
phecode-395.3-both_sexes	Nonrheumatic tricuspid valve disorders	0.371373	0.246815	0.134663	-0.214328	0.427697	0.617079	0.24711	0.424286	0.561225	141	TG	130.899	0.7319	158	400902
icd10-E10-both_sexes	E10 Insulin-dependent diabetes mellitus	-0.256106	0.170425	0.135155	-0.405119	0.297513	0.175501	-0.0465481	0.0980548	0.63573	141	TG	1231.08	0.0001	3246	417285
icd10-V29-both_sexes	V29 Motorcycle rider injured in other and unspecified transport accidents	-0.454675	0.30291	0.135602	-0.186863	0.529216	0.724553	-0.125716	0.442336	0.77667	141	TG	175.823	0.0297	141	420390
icd10-W45-both_sexes	W45 Foreign body or object entering through skin	0.215242	0.143405	0.135625	0.0819477	0.250553	0.744109	0.306099	0.19723	0.122922	141	TG	167.956	0.0736	604	419927
phecode-610.8-females	Other specified benign mammary dysplasias	0.120303	0.0801788	0.135754	-0.02489	0.139531	0.858682	0.0230332	0.120911	0.849195	141	TG	176.086	0.0296	2023	219947
categorical-20002-both_sexes-1631	Non-cancer illness code, self-reported	-0.257585	0.171759	0.135948	0.218461	0.296261	0.462126	0.0373509	0.254534	0.883547	141	TG	178.825	0.0201	446	420027
phecode-525-both_sexes	Other diseases of the teeth and supporting structures	0.0870172	0.0580811	0.136333	0.243916	0.100308	0.0163018	0.0659878	0.100027	0.510529	141	TG	144.634	0.4229	3156	408157
phecode-244-both_sexes	Hypothyroidism	-0.110193	0.0736436	0.136825	-0.08631	0.128815	0.503948	0.00440889	0.0482919	0.927387	141	TG	1160.98	0.0001	18404	399034
categorical-20002-both_sexes-1626	Non-cancer illness code, self-reported	-0.298021	0.199247	0.136974	-0.366447	0.348446	0.29478	-0.390175	0.315531	0.218318	141	TG	155.911	0.2104	289	420184
phecode-599.9-both_sexes	Other abnormality of urination	-0.100092	0.0669312	0.137049	-0.16869	0.116925	0.151348	-0.0910783	0.117347	0.438974	141	TG	125.935	0.8264	2089	395845
phecode-189.21-both_sexes	Malignant neoplasm of bladder	0.102735	0.0687153	0.137143	-0.0480313	0.119205	0.687619	0.0823679	0.100839	0.415417	141	TG	162.607	0.1179	2590	415431
categorical-20002-both_sexes-1538	Non-cancer illness code, self-reported	0.101727	0.0680968	0.137465	0.0669761	0.118996	0.574448	0.0678433	0.0978717	0.489341	141	TG	200.945	0.0006	3265	417208
phecode-597.2-both_sexes	Urinary complications NEC	-0.455222	0.304781	0.137529	-1.28299	0.526788	0.016138	-0.881444	0.515252	0.0893502	141	TG	128.731	0.7776	102	403310
phecode-530.11-both_sexes	GERD	0.0450896	0.0302422	0.138225	-0.0334487	0.0523035	0.523542	0.0288372	0.0334453	0.390041	141	TG	324.297	0.0001	29975	371349
categorical-20002-both_sexes-1113	Non-cancer illness code, self-reported	-0.0750627	0.0504398	0.138957	0.00855241	0.0879192	0.922648	-0.136657	0.0736234	0.0655327	141	TG	189.698	0.0049	5844	414629
phecode-526-both_sexes	Diseases of the jaws	-0.136221	0.0916398	0.139401	-0.421452	0.157696	0.00842787	-0.305651	0.149705	0.0430603	141	TG	128.927	0.7728	1133	408157
phecode-337-both_sexes	Disorders of the autonomic nervous system	0.222665	0.149878	0.139623	0.0736239	0.262073	0.779182	0.0504593	0.260914	0.84693	141	TG	104.403	0.9932	343	403249
categorical-20001-both_sexes-1068	Cancer code, self-reported	0.313477	0.211162	0.139916	-0.0271918	0.367629	0.941144	-0.0807107	0.354575	0.820268	141	TG	133.158	0.6875	220	420253
icd10-I36-both_sexes	I36 Nonrheumatic tricuspid valve disorders	0.365884	0.246517	0.139999	-0.221259	0.427137	0.605278	0.245851	0.423681	0.562663	141	TG	130.511	0.7398	158	420373
icd10-G37-both_sexes	G37 Other demyelinating diseases of central nervous system	-0.280679	0.18918	0.140147	-0.155657	0.330849	0.638752	-0.210316	0.286766	0.464536	141	TG	154.7	0.2286	320	420211
phecode-716.2-both_sexes	Unspecified monoarthritis	-0.0522821	0.0353119	0.140965	0.0228609	0.0613023	0.709776	-0.0429772	0.0424556	0.313147	141	TG	297.357	0.0001	20094	372332
icd10-D68-both_sexes	D68 Other coagulation defects	0.147449	0.0998065	0.142097	0.102234	0.171083	0.551215	0.202633	0.151911	0.184663	126	TG	133.096	0.3473	1159	419372
phecode-624.1-females	Dystrophy of female genital tract	-0.258161	0.174884	0.142139	-0.399535	0.305694	0.193378	-0.286967	0.27978	0.306807	141	TG	134.028	0.6673	323	216940
phecode-528.7-both_sexes	Sialolithiasis	0.255531	0.173168	0.142292	-0.0209114	0.301934	0.944884	-0.0277739	0.283232	0.922025	141	TG	140.066	0.5261	343	413830
icd10-L94-both_sexes	L94 Other localised connective tissue disorders	-0.425796	0.288799	0.142627	-0.164771	0.504892	0.744652	-0.338489	0.427423	0.429742	141	TG	187.596	0.0075	165	420366
phecode-599.6-both_sexes	Oliguria and anuria	-0.420232	0.285203	0.142875	-0.619918	0.498706	0.215941	-0.203134	0.442781	0.647111	141	TG	157.091	0.1901	141	395845
phecode-381.9-both_sexes	Otorrhea	0.261476	0.177701	0.143416	0.628292	0.309032	0.0439464	0.299158	0.291169	0.305986	141	TG	132.51	0.7	311	416007
icd10-R22-both_sexes	R22 Localised swelling, mass and lump of skin and subcutaneous tissue	0.1121	0.0761914	0.143455	0.0844771	0.133336	0.527404	0.11951	0.109465	0.27681	141	TG	189.28	0.0053	2409	418122
phecode-367-both_sexes	Disorders of refraction and accommodation; blindness and low vision	0.081731	0.055602	0.143825	0.11621	0.0972425	0.2341	0.13542	0.0817849	0.1	141	TG	155.24	0.2196	3756	416775
phecode-415.1-both_sexes	Acute pulmonary heart disease	-0.0861298	0.0586435	0.144157	-0.0571865	0.102592	0.578138	-0.0359586	0.0820341	0.661818	141	TG	214.6	0.0001	4719	411769
phecode-415.11-both_sexes	Pulmonary embolism and infarction, acute	-0.086118	0.0586433	0.14421	-0.0571722	0.102592	0.578233	-0.0359305	0.0834879	0.66759	141	TG	214.603	0.0001	4719	411769
icd10-S65-both_sexes	S65 Injury of blood vessels at wrist and hand level	0.340675	0.232048	0.144314	-0.0742873	0.403926	0.854349	0.35761	0.409172	0.383624	141	TG	122.343	0.8812	167	420364
phecode-245.21-both_sexes	Chronic lymphocytic thyroiditis	-0.391243	0.266822	0.144807	0.503876	0.457553	0.272694	-0.0194623	0.352995	0.95611	141	TG	240.783	0.0001	249	399034
categorical-20002-both_sexes-1467	Non-cancer illness code, self-reported	0.0984659	0.0672379	0.145316	-0.0320927	0.11696	0.784191	0.0935692	0.100267	0.352323	141	TG	158.943	0.1652	2615	417858
phecode-519-both_sexes	Other diseases of respiratory system, not elsewhere classified	0.0451425	0.0308322	0.145398	0.0345244	0.0539951	0.523616	0.0617315	0.0479363	0.199946	141	TG	153.758	0.2456	12739	407792
icd10-D40-both_sexes	D40 Neoplasm of uncertain or unknown behaviour of male genital organs	0.436211	0.298008	0.145503	0.717796	0.521064	0.170554	0.0251938	0.483714	0.958536	141	TG	147.077	0.3731	121	420410
categorical-20002-both_sexes-1616	Non-cancer illness code, self-reported	-0.262921	0.179651	0.145569	-0.510273	0.313092	0.10541	-0.318969	0.255172	0.21338	141	TG	170.466	0.0575	389	420084
icd10-K21-both_sexes	K21 Gastro-oesophageal reflux disease	0.0435183	0.0297444	0.145688	-0.0362689	0.0514005	0.481609	0.031134	0.0332683	0.350964	141	TG	316.641	0.0001	29975	390556
phecode-697-both_sexes	Sarcoidosis	-0.259776	0.177621	0.145839	0.127872	0.308207	0.678862	-0.00431132	0.213501	0.983918	141	TG	282.821	0.0001	667	412638
phecode-426.9-both_sexes	Cardiac pacemaker/device in situ	0.0896974	0.0613346	0.145865	-0.0786507	0.105898	0.458914	0.0191365	0.0972721	0.844322	141	TG	171.18	0.0532	3417	384657
icd10-D51-both_sexes	D51 Vitamin B12 deficiency anaemia	-0.172089	0.117728	0.146052	-0.174418	0.206205	0.399093	-0.277614	0.175005	0.114924	141	TG	206.193	0.0002	1112	419419
icd10-F06-both_sexes	F06 Other mental disorders due to brain damage and dysfunction and to physical disease	0.25913	0.177297	0.146104	-0.0533666	0.309041	0.86315	0.262719	0.24407	0.283597	141	TG	161.11	0.1356	379	420152
icd10-Z59-both_sexes	Z59 Problems related to housing and economic circumstances	-0.34144	0.233952	0.146683	-0.833457	0.406666	0.0422948	-0.613945	0.375416	0.104217	141	TG	141.35	0.495	190	420341
phecode-907-both_sexes	Injuries to the nervous system	0.13556	0.0929579	0.146998	0.120442	0.162973	0.461136	0.086222	0.137768	0.532434	141	TG	172.157	0.0469	1483	418912
phecode-506-both_sexes	Empyema and pneumothorax	-0.118974	0.0816772	0.147455	-0.119115	0.143046	0.406441	-0.0444558	0.139232	0.749979	141	TG	134.362	0.6589	1484	404684
phecode-726.3-both_sexes	Bursitis	-0.154447	0.106111	0.147765	0.125415	0.18346	0.495358	0.00786562	0.164047	0.961826	141	TG	153.638	0.2481	1009	386932
phecode-530.14-both_sexes	Reflux esophagitis	0.058119	0.0400087	0.148556	-0.0170809	0.0696083	0.80652	0.0462897	0.0493693	0.350054	141	TG	256.705	0.0001	12567	371349
categorical-20002-both_sexes-1120	Non-cancer illness code, self-reported	0.3543	0.244028	0.148771	-0.174501	0.423714	0.681093	-0.0337834	0.386161	0.930411	141	TG	141.429	0.4938	175	420298
icd10-R23-both_sexes	R23 Other skin changes	-0.185809	0.128014	0.148884	0.0799321	0.22238	0.719812	-0.0376178	0.182383	0.83689	141	TG	191.634	0.0034	865	419666
phecode-530.1-both_sexes	Esophagitis, GERD and related diseases	0.0387946	0.0267419	0.149099	-0.0303318	0.0462596	0.513109	0.0175818	0.0286735	0.540757	141	TG	324.757	0.0001	40018	371349
icd10-Z86-both_sexes	Z86 Personal history of certain other diseases	0.025094	0.0173104	0.149394	0.0196542	0.0302917	0.517517	0.0293609	0.0257592	0.256307	141	TG	198.897	0.0011	64593	355938
icd10-Z80-both_sexes	Z80 Family history of malignant neoplasm	0.0427788	0.0295213	0.149551	0.0163762	0.0515968	0.751426	0.0856707	0.0464809	0.0674234	141	TG	141.363	0.4972	12504	408027
categorical-20002-both_sexes-1226	Non-cancer illness code, self-reported	-0.120972	0.0835009	0.149643	-0.0886116	0.146065	0.545067	0.0104875	0.0403276	0.795201	141	TG	1593	0.0001	20563	399910
phecode-281.12-both_sexes	Other vitamin B12 deficiency anemia	-0.171923	0.118789	0.15005	-0.172186	0.208088	0.40939	-0.269005	0.172425	0.120987	141	TG	209.503	0.0001	1112	396365
icd10-W27-both_sexes	W27 Contact with nonpowered hand tool	0.228487	0.157963	0.150283	0.254655	0.276617	0.358852	0.215673	0.242385	0.375104	141	TG	146.716	0.3802	434	420097
icd10-N28-both_sexes	N28 Other disorders of kidney and ureter, not elsewhere classified	0.0963456	0.0667667	0.151248	0.00328874	0.116478	0.977515	0.0140218	0.0940822	0.881738	141	TG	186.339	0.0094	3146	417385
categorical-20002-both_sexes-1371	Non-cancer illness code, self-reported	-0.414778	0.287452	0.151268	0.170032	0.498358	0.73348	0.182011	0.185118	0.327196	141	TG	891.895	0.0001	809	419664
icd10-Z92-both_sexes	Z92 Personal history of medical treatment	0.0347339	0.024077	0.151362	-0.00831608	0.0418946	0.842944	0.0310507	0.030992	0.318123	141	TG	256.372	0.0001	39866	380665
icd10-B96-both_sexes	B96 Other bacterial agents as the cause of diseases classified to other chapters	0.04327	0.0300412	0.152	0.0438567	0.0526068	0.405897	0.0467262	0.0512812	0.363768	141	TG	124.758	0.8435	10629	409902
icd10-W44-both_sexes	W44 Foreign body entering into or through eye or natural orifice	0.169945	0.118045	0.152197	0.211888	0.206641	0.306959	-0.0553745	0.198112	0.780265	141	TG	128.716	0.7769	681	419850
icd10-L08-both_sexes	L08 Other local infections of skin and subcutaneous tissue	-0.107171	0.0744913	0.152465	-0.214485	0.129899	0.100961	-0.0309993	0.132077	0.81478	141	TG	120.862	0.9014	1603	418928
phecode-575.9-both_sexes	Nonspecific abnormal findings on radiological and other examination of biliary tract	-0.197335	0.137163	0.152471	-0.25876	0.239947	0.282721	-0.249457	0.23247	0.285086	141	TG	116.793	0.9426	458	399542
icd10-Q82-both_sexes	Q82 Other congenital malformations of skin	-0.315706	0.21988	0.153287	-0.522137	0.384237	0.176381	-0.22194	0.38921	0.569434	141	TG	124.555	0.848	189	420342
icd10-S63-both_sexes	S63 Dislocation, sprain and strain of joints and ligaments at wrist and hand level	0.177098	0.123568	0.15403	-0.168865	0.213302	0.4299	0.0305044	0.201913	0.880133	141	TG	148.841	0.3376	715	419816
icd10-N35-both_sexes	N35 Urethral stricture	0.0780401	0.054602	0.155159	0.126556	0.0954764	0.187171	0.11581	0.0843546	0.171982	141	TG	151.404	0.2909	3805	416726
icd10-J84-both_sexes	J84 Other interstitial pulmonary diseases	-0.12625	0.0887348	0.157024	0.0477394	0.154322	0.75752	-0.200134	0.137425	0.147546	141	TG	156.19	0.2034	1497	419034
phecode-575.7-both_sexes	Other disorders of gallbladder	-0.11058	0.0777625	0.157245	-0.273924	0.135001	0.0443614	-0.317789	0.124317	0.0116464	141	TG	140.753	0.5096	1729	399542
phecode-962-both_sexes	Poisoning by hormones and synthetic substitutes	-0.19789	0.139338	0.157767	-0.191415	0.243821	0.433752	-0.302687	0.220899	0.172802	141	TG	161.107	0.1356	610	383239
phecode-636.2-females	Early onset of delivery	-0.214767	0.151298	0.157977	-0.0611126	0.264451	0.817583	-0.0944293	0.203262	0.642962	141	TG	195.113	0.0023	646	219979
icd10-Z43-both_sexes	Z43 Attention to artificial openings	-0.10174	0.071722	0.158258	0.0146632	0.124952	0.906752	-0.179496	0.115533	0.122528	141	TG	149.284	0.3318	2155	418376
icd10-Z72-both_sexes	Z72 Problems related to lifestyle	0.0357433	0.0252203	0.158634	-0.069579	0.0427978	0.106265	-0.0139046	0.036951	0.707264	141	TG	159.592	0.1566	21081	399450
categorical-20002-both_sexes-1633	Non-cancer illness code, self-reported	0.154567	0.109299	0.159533	0.151563	0.191105	0.429078	0.21219	0.171682	0.218547	141	TG	140.23	0.522	867	419606
phecode-348.9-both_sexes	Other conditions of brain, NOS	0.18144	0.128333	0.159634	0.707362	0.217869	0.00146316	0.425323	0.215314	0.0501937	141	TG	122.33	0.8826	547	403249
phecode-288-both_sexes	Diseases of white blood cells	-0.0726562	0.0514401	0.160039	0.0550026	0.0890575	0.537844	0.00794936	0.0738455	0.914429	141	TG	172.172	0.0456	4868	410877
categorical-20544-both_sexes-5	Mental health problems ever diagnosed by a professional	0.111527	0.0790108	0.160303	0.155227	0.138086	0.262896	0.121674	0.125757	0.33495	141	TG	153.167	0.255	1848	134102
icd10-F45-both_sexes	F45 Somatoform disorders	0.223606	0.15846	0.160428	0.255864	0.277369	0.357882	0.252444	0.234097	0.282722	141	TG	162.108	0.1234	476	420055
phecode-579-both_sexes	Other symptoms involving abdomen and pelvis	0.0834087	0.0591476	0.160705	-0.0471102	0.103015	0.648159	0.0499242	0.0908409	0.583484	141	TG	158.363	0.1732	3458	390772
icd10-K46-both_sexes	K46 Unspecified abdominal hernia	0.228951	0.162362	0.16072	-0.143892	0.281449	0.609984	0.190502	0.251304	0.449692	141	TG	148.126	0.3512	413	420118
phecode-721.2-both_sexes	Spondylosis with myelopathy	-0.274159	0.194586	0.16107	-0.684621	0.338026	0.0447455	-0.485431	0.333312	0.147525	141	TG	132.257	0.7059	257	401917
icd10-D86-both_sexes	D86 Sarcoidosis	-0.248757	0.17709	0.162327	0.0803774	0.307953	0.794474	-0.0810863	0.215916	0.707823	141	TG	271.87	0.0001	639	419892
phecode-433.1-both_sexes	Occlusion and stenosis of precerebral arteries	0.118668	0.0845467	0.162659	0.142931	0.147985	0.335796	0.120289	0.125116	0.338	141	TG	160.118	0.15	1689	407633
icd10-N43-both_sexes	N43 Hydrocele and spermatocele	-0.110359	0.0786584	0.162827	-0.0707072	0.137621	0.60822	-0.10114	0.127457	0.428817	141	TG	131.724	0.7167	1595	418936
categorical-20001-both_sexes-1055	Cancer code, self-reported	-0.289323	0.206601	0.163609	0.334032	0.355835	0.349499	0.179448	0.331258	0.588876	141	TG	161.231	0.1348	277	420196
phecode-966-both_sexes	Poisoning by anticonvulsants and anti-Parkinsonism drugs	-0.159621	0.114203	0.164415	-0.3396	0.199177	0.0904251	-0.0504224	0.20004	0.801363	141	TG	129.314	0.7653	733	383239
phecode-286.12-both_sexes	Congenital deficiency of other clotting factors (including factor VII)	0.237634	0.170217	0.164905	0.0521434	0.296878	0.860833	0.347202	0.292645	0.237463	141	TG	136.662	0.6037	345	416975
phecode-395.4-both_sexes	Nonrheumatic pulmonary valve disorders	0.332108	0.23824	0.165525	0.46785	0.416956	0.263771	0.423553	0.393944	0.284153	141	TG	127.044	0.8082	165	400902
phecode-619.1-females	Noninflammatory disorders of ovary, fallopian tube, and broad ligament	0.0682173	0.0489919	0.166003	0.0828921	0.0857163	0.335197	0.145075	0.0723614	0.0469049	141	TG	178.117	0.0226	5718	212227
categorical-20002-both_sexes-1261	Non-cancer illness code, self-reported	-0.210777	0.151394	0.166057	0.228908	0.260959	0.381902	0.130832	0.139576	0.35019	141	TG	466.264	0.0001	1535	418938
phecode-612-both_sexes	Breast conditions, congenital or relating to hormones	0.145403	0.104456	0.166129	0.237341	0.182709	0.196089	0.238781	0.161125	0.140598	141	TG	147.883	0.3574	1007	412667
categorical-20002-both_sexes-1623	Non-cancer illness code, self-reported	-0.289476	0.208016	0.16625	-0.647434	0.361826	0.0757356	-0.0985956	0.375698	0.793373	141	TG	138.25	0.569	234	420239
categorical-20002-both_sexes-1540	Non-cancer illness code, self-reported	0.402486	0.289406	0.166513	-0.26213	0.501382	0.601935	0.0856802	0.442101	0.846611	141	TG	175.663	0.0308	154	420319
phecode-292.4-both_sexes	Altered mental status	-0.0969659	0.069751	0.166683	-0.0652681	0.122074	0.593739	-0.0809613	0.0900352	0.37008	141	TG	206.818	0.0001	3180	410833
icd10-W54-both_sexes	W54 Bitten or struck by dog	-0.190125	0.136829	0.166884	-0.67078	0.234178	0.00482667	-0.414817	0.196513	0.0365591	141	TG	173.183	0.041	682	419849
categorical-20002-both_sexes-1138	Non-cancer illness code, self-reported	0.0542006	0.0390123	0.166941	-0.092606	0.0665927	0.166559	-0.0260192	0.0413587	0.530302	141	TG	342.405	0.0001	17994	402479
icd10-Q18-both_sexes	Q18 Other congenital malformations of face and neck	-0.360761	0.259767	0.167104	-0.398818	0.454679	0.381923	-0.556583	0.418597	0.185799	141	TG	126.289	0.8207	138	420393
phecode-458.2-both_sexes	Iatrogenic hypotension	-0.25718	0.185215	0.167176	-0.212532	0.324181	0.513167	-0.228915	0.305968	0.455614	141	TG	144.76	0.4197	311	392807
icd10-J69-both_sexes	J69 Pneumonitis due to solids and liquids	-0.135387	0.0975342	0.167312	-0.387953	0.16879	0.0230289	-0.218616	0.16515	0.187747	141	TG	127.878	0.7929	990	419541
icd10-N89-both_sexes	N89 Other noninflammatory disorders of vagina	-0.113474	0.0818563	0.167874	-0.0538396	0.143086	0.707287	-0.126336	0.116981	0.282015	141	TG	154.215	0.2365	1692	418839
categorical-20002-both_sexes-1247	Non-cancer illness code, self-reported	-0.110432	0.0797915	0.168559	-0.0754216	0.139616	0.589918	-0.0832954	0.132298	0.529981	141	TG	152.448	0.2704	1761	418712
categorical-20002-both_sexes-1165	Non-cancer illness code, self-reported	-0.155186	0.112151	0.168647	-0.56155	0.191739	0.00397888	-0.227337	0.177347	0.202006	141	TG	156.206	0.2043	915	419558
phecode-441.1-both_sexes	Acute vascular insufficiency of intestine	-0.240738	0.173987	0.168666	0.31294	0.29936	0.297668	-0.486139	0.270707	0.0746812	141	TG	147.872	0.359	361	408565
icd10-Z98-both_sexes	Z98 Other postsurgical states	0.0629634	0.0455363	0.168956	0.177783	0.0787888	0.0256031	0.138689	0.0760989	0.070516	141	TG	125.883	0.8289	4554	415977
phecode-276-both_sexes	Disorders of fluid, electrolyte, and acid-base balance	-0.0436424	0.0315816	0.169206	-0.0738508	0.055198	0.183105	-0.0911896	0.0520591	0.0820227	141	TG	139.63	0.5362	10950	409482
icd10-D41-both_sexes	D41 Neoplasm of uncertain or unknown behaviour of urinary organs	0.143351	0.104	0.170287	0.0991231	0.182093	0.587069	0.135963	0.163154	0.406071	141	TG	136.582	0.6074	938	419593
phecode-426.25-both_sexes	Other heart block	0.34203	0.248143	0.170291	-0.76487	0.418816	0.0699559	-0.298664	0.408052	0.465438	141	TG	135.976	0.6217	162	384657
categorical-20002-both_sexes-1610	Non-cancer illness code, self-reported	-0.233854	0.169751	0.170516	0.416305	0.288941	0.151891	-0.00110899	0.257105	0.996565	141	TG	157.485	0.1831	399	420074
icd10-D16-both_sexes	D16 Benign neoplasm of bone and articular cartilage	-0.208394	0.151369	0.170793	-0.0115494	0.264192	0.965194	-0.176873	0.276598	0.52357	141	TG	108.458	0.9847	348	420183
phecode-520.2-both_sexes	Disturbances in tooth eruption	-0.0895583	0.0651038	0.171135	-0.192321	0.113533	0.0925119	-0.140139	0.103567	0.178194	141	TG	143.654	0.4446	2533	408157
categorical-20002-both_sexes-1537	Non-cancer illness code, self-reported	-0.114078	0.0831064	0.172047	-0.28763	0.144187	0.0480153	-0.165458	0.136525	0.227583	141	TG	130.338	0.7441	1384	419089
phecode-597.1-both_sexes	Urethral stricture (not specified as infectious)	0.0751714	0.0547772	0.172161	0.107663	0.0958662	0.26335	0.121731	0.0826878	0.143218	141	TG	155.57	0.2138	3903	403310
phecode-614.3-females	Pelvic inflammatory disease (PID)	0.129499	0.0944219	0.172415	0.0878437	0.165303	0.595983	0.0962027	0.167034	0.565575	141	TG	121.106	0.8978	1005	217500
icd10-G44-both_sexes	G44 Other headache syndromes	0.192127	0.14034	0.173186	0.234679	0.245685	0.341134	0.210298	0.201087	0.297454	141	TG	167.168	0.0792	631	419900
phecode-465-both_sexes	Acute upper respiratory infections of multiple or unspecified sites	0.0926481	0.0677381	0.173585	-0.194018	0.114831	0.0933462	-0.0122033	0.0980169	0.901096	141	TG	175.016	0.0328	2822	417499
phecode-426.91-both_sexes	Cardiac pacemaker in situ	0.0849722	0.0621297	0.17361	-0.0852062	0.107274	0.428381	-0.000729616	0.100369	0.99421	141	TG	162.126	0.1224	3159	384657
icd10-J30-both_sexes	J30 Vasomotor and allergic rhinitis	-0.0993461	0.072735	0.174172	-0.00234061	0.126836	0.985303	-0.0805322	0.133197	0.546418	141	TG	106.475	0.9896	1489	419042
icd10-M34-both_sexes	M34 Systemic sclerosis	-0.346692	0.253868	0.174243	0.700624	0.430771	0.106121	0.116687	0.369505	0.75263	141	TG	191.763	0.0033	218	420313
phecode-574.3-both_sexes	Cholecystitis without cholelithiasis	-0.0937832	0.068797	0.175012	-0.154396	0.120299	0.201473	-0.161378	0.0954516	0.0931226	141	TG	203.751	0.0003	3252	399542
categorical-20002-both_sexes-1202	Non-cancer illness code, self-reported	0.113947	0.083602	0.17508	0.122403	0.146243	0.404038	0.0474444	0.133892	0.723611	141	TG	139.428	0.5411	1479	418994
categorical-20544-both_sexes-17	Mental health problems ever diagnosed by a professional	0.214368	0.157367	0.175316	0.141157	0.27497	0.608517	0.186054	0.232871	0.425669	141	TG	177.095	0.025	531	135415
phecode-151-both_sexes	Cancer of stomach	-0.164793	0.121039	0.175549	-0.301352	0.211502	0.156451	-0.234544	0.195048	0.231204	141	TG	152.1	0.2768	767	400294
icd10-N17-both_sexes	N17 Acute renal failure	-0.0647614	0.0475925	0.17578	-0.0184988	0.083185	0.824344	-0.11072	0.0630285	0.0811621	141	TG	223.912	0.0001	7727	412804
phecode-930-both_sexes	Allergic reaction to food	0.33614	0.247125	0.175952	-0.374492	0.42625	0.381149	0.128063	0.358395	0.721388	141	TG	181.663	0.0146	219	412489
phecode-722.6-both_sexes	Degeneration of intervertebral disc	-0.0751505	0.0552888	0.176257	-0.146736	0.0964699	0.130518	-0.272059	0.0949888	0.00482588	141	TG	148.165	0.3511	3609	401917
phecode-244.4-both_sexes	Hypothyroidism NOS	-0.102398	0.0753362	0.176263	-0.0856883	0.131785	0.516628	0.0229126	0.0473388	0.629133	141	TG	1158.16	0.0001	17562	399034
icd10-H95-both_sexes	H95 Postprocedural disorders of ear and mastoid process, not elsewhere classified	-0.367422	0.270456	0.176481	-0.131258	0.473107	0.781855	-0.232636	0.47175	0.62269	141	TG	123.882	0.8583	119	420412
phecode-1008-both_sexes	Crushing or internal injury to organs	-0.127983	0.0942653	0.176745	-0.0707202	0.165011	0.668894	-0.0995155	0.146391	0.497757	141	TG	154.093	0.2395	1284	419247
icd10-I37-both_sexes	I37 Pulmonary valve disorders	0.328313	0.242504	0.177966	0.445246	0.424418	0.295964	0.426436	0.404239	0.293282	141	TG	130.902	0.7315	164	420367
icd10-Z31-both_sexes	Z31 Procreative management	-0.210936	0.155973	0.178432	-0.436495	0.272195	0.111069	-0.442088	0.275524	0.11085	141	TG	106.325	0.9899	322	420209
icd10-E03-both_sexes	E03 Other hypothyroidism	-0.10113	0.07478	0.178436	-0.0861942	0.130823	0.511073	0.0302602	0.0462364	0.513884	141	TG	1147.47	0.0001	17592	402939
icd10-I78-both_sexes	I78 Diseases of capillaries	0.158354	0.117266	0.179071	-0.155577	0.202797	0.44429	-0.0225955	0.185872	0.903418	141	TG	148.568	0.3429	803	419728
categorical-20002-both_sexes-1625	Non-cancer illness code, self-reported	-0.255864	0.189544	0.17923	-0.581325	0.329853	0.0802038	-0.406823	0.306994	0.18727	141	TG	127.082	0.8084	260	420213
icd10-B02-both_sexes	B02 Zoster [herpes zoster]	-0.174166	0.129042	0.179296	0.101718	0.224114	0.650632	-0.347361	0.200834	0.0859067	141	TG	145.585	0.4032	648	419883
icd10-N25-both_sexes	N25 Disorders resulting from impaired renal tubular function	-0.439412	0.326251	0.180204	0.0581503	0.568593	0.918689	-0.416942	0.512479	0.417267	141	TG	152.834	0.2617	105	420426
phecode-550.4-both_sexes	Umbilical hernia	0.0797021	0.0591802	0.180231	0.0641266	0.103586	0.536886	0.0619771	0.079528	0.437112	141	TG	208.096	0.0001	4541	363863
categorical-20002-both_sexes-1382	Non-cancer illness code, self-reported	-0.45268	0.336181	0.180305	0.662983	0.576346	0.251987	0.330469	0.27027	0.223484	141	TG	582.495	0.0001	384	420089
categorical-20002-both_sexes-1067	Non-cancer illness code, self-reported	-0.155735	0.115864	0.181081	0.191421	0.199626	0.339275	-0.164503	0.18948	0.386781	141	TG	142.796	0.463	785	419688
phecode-202.2-both_sexes	Non-Hodgkins lymphoma	-0.128362	0.0957088	0.182038	0.206497	0.163855	0.209695	0.0587557	0.111426	0.598814	141	TG	277.546	0.0001	2267	414840
phecode-223-both_sexes	Benign neoplasm of kidney and other urinary organs	-0.279018	0.208361	0.182705	-0.207988	0.3648	0.569501	-0.367179	0.348383	0.293721	141	TG	133.408	0.6813	226	377237
phecode-281-both_sexes	Other deficiency anemia	-0.14513	0.108376	0.182829	-0.0677412	0.187406	0.718332	-0.191319	0.150771	0.206698	133	TG	206.512	0.0001	1435	396365
icd10-R25-both_sexes	R25 Abnormal involuntary movements	-0.118981	0.0891519	0.184177	0.00403926	0.155544	0.97932	-0.0916519	0.148678	0.538602	141	TG	128.893	0.7738	1201	419330
categorical-20002-both_sexes-1657	Non-cancer illness code, self-reported	0.264564	0.198459	0.184666	0.345538	0.347058	0.321164	0.275368	0.32817	0.402843	141	TG	135.794	0.6246	253	420220
phecode-473-both_sexes	Diseases of the larynx and vocal cords	0.0706868	0.0531139	0.185401	0.000232415	0.0927614	0.998004	0.0379884	0.0912054	0.677671	141	TG	115.465	0.9533	3063	398757
icd10-K62-both_sexes	K62 Other diseases of anus and rectum	0.0307292	0.0231255	0.186075	-0.0229755	0.0401014	0.567614	-0.0119199	0.0349115	0.733291	141	TG	179.071	0.0195	26804	393727
phecode-198-both_sexes	Secondary malignant neoplasm	-0.0438525	0.0330244	0.186379	-0.0937027	0.0575918	0.105999	-0.0936048	0.0495453	0.0609226	141	TG	171.912	0.0484	12400	367856
categorical-20002-both_sexes-1508	Non-cancer illness code, self-reported	0.217275	0.163715	0.186618	0.0503947	0.28591	0.860346	0.0401506	0.269953	0.881979	141	TG	130.892	0.7318	355	420118
phecode-303.4-both_sexes	Somatoform disorder	0.195016	0.147028	0.186871	0.190665	0.257378	0.460067	0.177294	0.224225	0.430458	141	TG	161.156	0.135	549	369930
categorical-20002-both_sexes-1408	Non-cancer illness code, self-reported	-0.181983	0.137246	0.187011	-0.133069	0.240773	0.581374	-0.59727	0.230446	0.0105597	141	TG	156.546	0.1988	622	419851
phecode-444.1-both_sexes	Arterial embolism and thrombosis of lower extremity artery	0.198524	0.149729	0.187035	0.727738	0.2565	0.00523276	0.440099	0.195211	0.0257184	141	TG	204.973	0.0002	676	408565
phecode-473.3-both_sexes	Paralysis/spasm of vocal cords or larynx	0.202709	0.15307	0.187564	0.172542	0.268093	0.5209	0.21733	0.277059	0.434122	141	TG	107.786	0.987	339	398757
phecode-427-both_sexes	Cardiac dysrhythmias	0.0331384	0.0250405	0.187863	0.0410554	0.043822	0.350451	0.0355608	0.0345771	0.305512	141	TG	222.891	0.0001	31341	384657
icd10-M92-both_sexes	M92 Other juvenile osteochondrosis	-0.304591	0.230478	0.188469	0.194453	0.399994	0.627633	-0.0940508	0.413929	0.820588	141	TG	104.037	0.9937	144	420387
categorical-6148-both_sexes-5	Eye problems/disorders	-0.0800589	0.0606463	0.188957	0.0158434	0.105677	0.881042	-0.156525	0.0966044	0.107426	141	TG	155.373	0.2188	3224	132139
icd10-W20-both_sexes	W20 Struck by thrown, projected or falling object	0.221194	0.167576	0.189003	0.169169	0.29343	0.565195	0.187862	0.274991	0.495636	141	TG	138.688	0.5604	365	420166
icd10-L03-both_sexes	L03 Cellulitis	-0.0522306	0.0395857	0.189179	0.0253052	0.0688289	0.713691	-0.0730266	0.0569122	0.201561	141	TG	180.778	0.0155	8847	411684
phecode-372-both_sexes	Disorders of conjunctiva	-0.135826	0.102962	0.189259	0.0478931	0.179217	0.789684	-0.149261	0.169762	0.380779	141	TG	132.47	0.6995	925	409073
phecode-716.9-both_sexes	Arthropathy NOS	-0.0364971	0.0276824	0.189515	0.00987541	0.0482046	0.837978	0.0128447	0.0301651	0.670897	141	TG	347.462	0.0001	41824	372332
phecode-802-both_sexes	Fracture of pelvis	0.14749	0.111872	0.189527	0.253616	0.195555	0.196813	0.0332984	0.182399	0.855408	141	TG	154.49	0.2338	916	395047
phecode-585.1-both_sexes	Acute renal failure	-0.0635001	0.0481914	0.189768	-0.0160414	0.0842398	0.849254	-0.102683	0.0618618	0.0991789	141	TG	229.79	0.0001	7736	401927
icd10-S72-both_sexes	S72 Fracture of femur	0.210047	0.15942	0.189802	0.217244	0.279146	0.437748	0.147499	0.26556	0.57949	141	TG	114.393	0.9587	334	420197
icd10-Z93-both_sexes	Z93 Artificial opening status	-0.0689191	0.0523671	0.190299	-0.0578762	0.0916559	0.528783	-0.0338893	0.0834404	0.685252	141	TG	136.978	0.597	3777	416754
categorical-20544-both_sexes-4	Mental health problems ever diagnosed by a professional	0.216982	0.164872	0.190305	0.0642059	0.287746	0.823759	-0.00128607	0.290117	0.996469	141	TG	114.178	0.9598	308	135638
phecode-530-both_sexes	Diseases of esophagus	0.0334858	0.0254485	0.190383	-0.0226151	0.0441674	0.609442	0.0249026	0.0284279	0.382536	141	TG	310.258	0.0001	42944	371349
phecode-623-females	Hypertrophy of female genital organs	0.127773	0.0971595	0.190631	0.142295	0.17001	0.404041	0.0157094	0.147149	0.915133	141	TG	174.299	0.0365	1374	213800
phecode-528.1-both_sexes	Stomatitis and mucositis	0.163097	0.124079	0.19084	0.289974	0.216899	0.183436	0.304996	0.225489	0.178364	141	TG	125.184	0.8382	593	413830
phecode-613.1-both_sexes	Inflammatory disease of breast	0.140322	0.106881	0.191371	-0.175077	0.1844	0.344043	0.154702	0.186548	0.408354	141	TG	123.668	0.8625	802	418289
phecode-601-males	Inflammatory diseases of prostate	0.0812758	0.0620416	0.192334	-0.0717995	0.107462	0.505154	-0.0515496	0.0881268	0.559524	141	TG	177.78	0.0231	3493	169762
phecode-526.9-both_sexes	Jaw disease NOS	-0.233517	0.178513	0.192976	-0.77398	0.307561	0.0129889	-0.485253	0.300689	0.108822	141	TG	123.633	0.8622	285	408157
icd10-O70-both_sexes	O70 Perineal laceration during delivery	-0.0623266	0.0477174	0.19364	0.0776825	0.0822193	0.34639	-0.0615793	0.079496	0.43987	141	TG	144.004	0.4362	5429	415102
phecode-649.1-females	Diabetes or abnormal glucose tolerance complicating pregnancy	0.341361	0.261568	0.194016	-0.15204	0.454734	0.73862	0.190768	0.350414	0.587027	141	TG	190.291	0.0044	206	227185
phecode-642-females	Hypertension complicating pregnancy, childbirth, and the puerperium	0.115475	0.0886337	0.194769	-0.0792697	0.153776	0.607031	0.153548	0.167426	0.360662	141	TG	127.49	0.8006	1216	226285
phecode-705-both_sexes	Disorders of sweat glands	0.303543	0.233314	0.195393	-0.40507	0.402399	0.315858	-0.210703	0.313452	0.502563	141	TG	184.715	0.0106	251	409787
icd10-N83-both_sexes	N83 Noninflammatory disorders of ovary, Fallopian tube and broad ligament	0.063607	0.0489191	0.195652	0.0741344	0.0855905	0.3879	0.13382	0.0696548	0.0567397	141	TG	177.189	0.0245	5704	414827
phecode-704.1-both_sexes	Alopecia	-0.289611	0.22286	0.195901	-0.139976	0.389998	0.720203	-0.14448	0.396868	0.716368	141	TG	126.888	0.8124	187	413211
icd10-Z90-both_sexes	Z90 Acquired absence of organs, not elsewhere classified	0.0320318	0.0246502	0.195923	0.0685376	0.0429799	0.113063	0.0401106	0.0378291	0.290829	141	TG	151.676	0.2848	20049	400482
icd10-D30-both_sexes	D30 Benign neoplasm of urinary organs	-0.271308	0.208869	0.1961	-0.22037	0.365679	0.547734	-0.3171	0.360382	0.380422	141	TG	133.076	0.6878	224	420307
icd10-U80-both_sexes	U80 Agent resistant to penicillin and related antibiotics	0.145615	0.112105	0.196107	0.228207	0.195952	0.246174	-0.0324774	0.178838	0.856157	141	TG	145.928	0.3989	850	419681
icd10-B97-both_sexes	B97 Viral agents as the cause of diseases classified to other chapters	0.168629	0.129842	0.196171	0.354488	0.226198	0.119352	0.478886	0.209315	0.0236433	141	TG	147.137	0.3732	639	419892
phecode-530.2-both_sexes	Esophageal bleeding (varices/hemorrhage)	-0.095388	0.0734569	0.19623	0.0127497	0.128159	0.920897	0.00999035	0.111048	0.928444	141	TG	155.73	0.2127	2166	371349
phecode-378-both_sexes	Strabismus and other disorders of binocular eye movements	-0.0979967	0.075536	0.196645	0.0338851	0.131559	0.797123	-0.0735835	0.127461	0.564662	141	TG	131.538	0.7194	1714	410363
phecode-969-both_sexes	Poisoning by psychotropic agents	-0.0887688	0.068446	0.196793	-0.171866	0.119617	0.153022	0.0111972	0.115495	0.922904	141	TG	145.871	0.3969	2337	383239
icd10-W22-both_sexes	W22 Striking against or struck by other objects	0.124253	0.0958842	0.197154	0.0836318	0.167885	0.619166	0.0221626	0.170023	0.896476	141	TG	118.433	0.9276	951	419580
phecode-580.12-both_sexes	Non-proliferative glomerulonephritis	-0.465619	0.359436	0.197309	0.799706	0.61462	0.195364	-0.00148802	0.424333	0.997207	141	TG	276.014	0.0001	157	401927
phecode-415.2-both_sexes	Chronic pulmonary heart disease	-0.157316	0.121508	0.197556	0.145257	0.210436	0.491176	-0.0677307	0.195451	0.72946	141	TG	144.298	0.4293	728	411769
icd10-J92-both_sexes	J92 Pleural plaque	-0.123846	0.0956651	0.197596	0.000274903	0.167035	0.998689	0.0188087	0.153716	0.902789	141	TG	133.571	0.6786	1095	419436
icd10-D10-both_sexes	D10 Benign neoplasm of mouth and pharynx	0.185368	0.143255	0.197805	0.519736	0.248338	0.0381795	0.176335	0.2188	0.421656	141	TG	146.413	0.3866	526	420005
icd10-C51-both_sexes	C51 Malignant neoplasm of vulva	-0.372072	0.28794	0.198422	-0.431047	0.504188	0.394059	-0.663492	0.446789	0.139786	141	TG	147.781	0.3596	130	420401
phecode-687.3-both_sexes	Changes in skin texture	-0.39248	0.303936	0.198719	-0.13782	0.531469	0.795773	-0.445858	0.43257	0.304449	141	TG	169.271	0.064	135	411745
phecode-569.2-both_sexes	Gastrointestinal complications	0.142228	0.110192	0.198925	0.0759609	0.192729	0.694087	0.000978775	0.208991	0.99627	141	TG	101.88	0.9954	618	383086
phecode-365.2-both_sexes	Primary angle-closure glaucoma	-0.152647	0.118301	0.199066	-0.505566	0.203828	0.0143191	-0.219122	0.175725	0.214494	141	TG	173.803	0.0384	921	404535
icd10-T18-both_sexes	T18 Foreign body in alimentary tract	0.174742	0.135573	0.199553	0.338368	0.236916	0.155472	0.257262	0.237331	0.280239	141	TG	119.891	0.9128	481	420050
icd10-K00-both_sexes	K00 Disorders of tooth development and eruption	-0.28613	0.222119	0.199807	-0.229933	0.388411	0.554823	-0.179129	0.364807	0.624179	141	TG	143.655	0.4449	213	420318
icd10-W25-both_sexes	W25 Contact with sharp glass	-0.162585	0.126271	0.200015	0.0455813	0.22005	0.836203	-0.0415539	0.204353	0.839162	141	TG	125.637	0.8316	581	419950
categorical-20002-both_sexes-1274	Non-cancer illness code, self-reported	0.192315	0.14937	0.200041	0.173576	0.261534	0.507993	-0.027692	0.257731	0.91459	141	TG	123.136	0.8693	403	420070
icd10-N90-both_sexes	N90 Other noninflammatory disorders of vulva and perineum	0.089633	0.0696414	0.200195	0.0296479	0.121707	0.807899	-0.00780553	0.113717	0.945374	141	TG	142.571	0.4679	2175	418356
phecode-727.4-both_sexes	Ganglion and cyst of synovium, tendon, and bursa	-0.0674116	0.0524372	0.200716	0.0638516	0.0907929	0.483066	-0.00732844	0.0890058	0.934497	141	TG	135.359	0.6351	3670	386932
phecode-255-both_sexes	Disorders of adrenal glands	-0.178087	0.138548	0.200783	-0.0474125	0.242138	0.845047	0.120429	0.176731	0.496728	141	TG	211.428	0.0001	812	415877
phecode-716-both_sexes	Other arthropathies	-0.0356473	0.0277539	0.201121	0.00785646	0.0483603	0.871182	0.00446582	0.0311572	0.886234	141	TG	350.127	0.0001	42030	372332
categorical-20002-both_sexes-1510	Non-cancer illness code, self-reported	0.172224	0.134161	0.201363	0.139109	0.234549	0.554084	0.240538	0.222854	0.282285	141	TG	131.411	0.7209	536	419937
phecode-220-females	Benign neoplasm of ovary	-0.0978428	0.0764824	0.202913	0.0198217	0.133259	0.88197	-0.00727395	0.124382	0.953449	141	TG	132.208	0.7066	1680	197239
categorical-6152-both_sexes-7	Blood clot, DVT, bronchitis, emphysema, asthma, rhinitis, eczema, allergy diagnosed by doctor	0.0826804	0.0647179	0.203522	0.210918	0.11247	0.0628442	0.116587	0.0910635	0.202564	141	TG	194.785	0.0023	3493	416275
phecode-187.8-males	Neoplasm of uncertain behavior of male genital organs	0.372243	0.291549	0.203794	0.550108	0.510217	0.282819	0.163775	0.460226	0.722484	141	TG	145.144	0.414	125	184705
phecode-743.21-both_sexes	Pathologic fracture of vertebrae	-0.213823	0.167809	0.204701	0.00177959	0.293003	0.995163	-0.320797	0.267822	0.23302	141	TG	159.064	0.1628	415	411038
icd10-S50-both_sexes	S50 Superficial injury of forearm	0.192171	0.150941	0.205073	-0.257227	0.260026	0.324267	0.0837694	0.254093	0.742134	141	TG	138.528	0.5643	448	420083
phecode-053-both_sexes	Herpes zoster	-0.164161	0.12909	0.205597	0.151992	0.223639	0.497869	-0.255165	0.198177	0.200022	141	TG	147.256	0.3705	655	413496
icd10-D46-both_sexes	D46 Myelodysplastic syndromes	-0.207498	0.163431	0.206321	-0.420539	0.285292	0.142726	-0.518357	0.262108	0.0499317	141	TG	137.911	0.5759	380	420151
phecode-180.3-females	Cervical intraepithelial neoplasia [CIN] [Cervical dysplasia]	0.0852095	0.0671602	0.206636	0.0597106	0.117442	0.611959	0.0671042	0.109509	0.541021	141	TG	132.326	0.7039	2186	198725
icd10-E22-both_sexes	E22 Hyperfunction of pituitary gland	-0.212028	0.167128	0.20667	0.0218058	0.291542	0.940486	0.0874366	0.259486	0.736651	141	TG	151.975	0.2791	399	420132
icd10-D52-both_sexes	D52 Folate deficiency anaemia	-0.254186	0.200356	0.206775	0.258815	0.343863	0.452989	-0.183609	0.315081	0.561058	134	TG	130.999	0.5855	259	420272
icd10-O14-both_sexes	O14 Gestational [pregnancy-induced] hypertension with significant proteinuria	0.128113	0.10112	0.207284	-0.1186	0.175172	0.499498	-0.0165153	0.114124	0.885145	141	TG	438.301	0.0001	314	420217
icd10-J98-both_sexes	J98 Other respiratory disorders	-0.0476389	0.0376821	0.208248	-0.0469146	0.065972	0.478196	-0.0359299	0.0775564	0.643888	141	TG	90.9757	0.9997	4795	415736
icd10-S42-both_sexes	S42 Fracture of shoulder and upper arm	0.188618	0.149365	0.208758	0.442545	0.260204	0.0912236	0.202515	0.251791	0.422589	141	TG	135.456	0.6324	449	420082
phecode-735.21-both_sexes	Hammer toe (acquired)	0.0930775	0.0737144	0.208805	0.198391	0.128538	0.124995	0.135317	0.111485	0.226883	141	TG	168.467	0.0698	2321	403527
phecode-255.21-both_sexes	Glucocorticoid deficiency	-0.292551	0.2319	0.209212	0.0976502	0.403643	0.809197	0.121145	0.24418	0.620581	141	TG	334.242	0.0001	459	415877
icd10-H11-both_sexes	H11 Other disorders of conjunctiva	-0.12937	0.102613	0.209494	0.0820083	0.178261	0.646201	-0.110061	0.175379	0.531314	141	TG	130.133	0.7489	915	419616
icd10-N85-both_sexes	N85 Other noninflammatory disorders of uterus, except cervix	0.0609252	0.048353	0.209762	0.0647297	0.0845913	0.445446	0.0988145	0.068578	0.151844	141	TG	178.77	0.0205	5772	414759
phecode-599.5-both_sexes	Frequency of urination and polyuria	0.0729562	0.057928	0.209971	-0.204583	0.0972691	0.0372445	-0.0616017	0.0822191	0.454971	141	TG	202.467	0.0004	4550	395845
phecode-255.2-both_sexes	Adrenal hypofunction	-0.288874	0.229554	0.210336	0.0581191	0.39996	0.884675	0.108901	0.240836	0.651839	141	TG	329.591	0.0001	462	415877
icd10-Q63-both_sexes	Q63 Other congenital malformations of kidney	0.244706	0.194493	0.210424	0.471642	0.339614	0.167127	0.430143	0.293797	0.145413	141	TG	143.191	0.455	279	420252
icd10-L05-both_sexes	L05 Pilonidal cyst	0.184659	0.146818	0.21058	-0.0159087	0.25627	0.95059	0.273381	0.245147	0.266689	141	TG	153.866	0.2437	524	420007
icd10-D35-both_sexes	D35 Benign neoplasm of other and unspecified endocrine glands	0.125346	0.0996648	0.210602	0.0270263	0.174079	0.876847	0.171368	0.157542	0.27857	141	TG	147.74	0.3602	1094	419437
icd10-J38-both_sexes	J38 Diseases of vocal cords and larynx, not elsewhere classified	0.088365	0.0703191	0.210981	0.162487	0.122931	0.188415	0.0331857	0.115555	0.774395	141	TG	133.989	0.6693	2020	418511
categorical-20002-both_sexes-1143	Non-cancer illness code, self-reported	-0.164132	0.1308	0.211629	-0.326408	0.228407	0.15523	-0.120155	0.215665	0.578322	141	TG	148.102	0.3525	640	419833
phecode-350.2-both_sexes	Abnormality of gait	-0.0763463	0.0608951	0.212028	0.0834424	0.105323	0.429561	-0.0591952	0.0923952	0.522782	141	TG	155.839	0.2098	3114	415922
phecode-736-both_sexes	Other acquired deformities of limbs	0.0895663	0.071573	0.212876	0.170002	0.124971	0.175927	-0.00571176	0.108054	0.957919	141	TG	180.681	0.0161	2619	403527
icd10-R26-both_sexes	R26 Abnormalities of gait and mobility	-0.076152	0.0608662	0.212971	0.0800324	0.10533	0.448647	-0.0589411	0.0964692	0.542201	141	TG	155.262	0.2191	3111	417420
icd10-M18-both_sexes	M18 Arthrosis of first carpometacarpal joint	0.11467	0.0916542	0.212979	0.0706209	0.16026	0.660141	0.0341574	0.12475	0.784636	141	TG	196.653	0.0015	1752	418779
phecode-360.2-both_sexes	Progressive myopia	0.249212	0.199222	0.213048	0.322733	0.348173	0.355569	-0.126134	0.305929	0.680751	141	TG	154.916	0.2252	287	404535
icd10-E85-both_sexes	E85 Amyloidosis	0.319414	0.255414	0.213177	0.101116	0.446367	0.821121	0.357832	0.40902	0.383153	141	TG	154.821	0.2277	175	420356
phecode-008.5-both_sexes	Bacterial enteritis	0.076629	0.0612759	0.213182	-0.125954	0.105294	0.233648	-0.122373	0.0945568	0.197737	141	TG	164.759	0.0962	3275	407487
phecode-577.2-both_sexes	Chronic pancreatitis	0.164483	0.131561	0.213296	-0.245318	0.226542	0.280738	-0.0141657	0.215566	0.947699	141	TG	143.299	0.4537	607	417106
categorical-20002-both_sexes-1468	Non-cancer illness code, self-reported	-0.394119	0.315424	0.213571	-1.13676	0.546863	0.039484	-0.791707	0.460188	0.0875693	141	TG	175.812	0.0303	130	420343
phecode-334-both_sexes	Degenerative disease of the spinal cord	-0.0738442	0.0591588	0.214027	-0.0580572	0.103548	0.575918	-0.121644	0.109233	0.267351	141	TG	111.604	0.9742	2355	403249
phecode-280-both_sexes	Iron deficiency anemias	-0.057501	0.0460678	0.214048	-0.0264067	0.0805966	0.743676	-0.00939911	0.05046	0.852504	141	TG	292.037	0.0001	10590	396365
phecode-280.1-both_sexes	Iron deficiency anemias, unspecified or not due to blood loss	-0.0574999	0.0460676	0.214055	-0.0264091	0.0805962	0.743653	-0.00939911	0.0489077	0.847879	141	TG	292.034	0.0001	10590	396365
phecode-270.33-both_sexes	Amyloidosis	0.318474	0.255241	0.214209	0.100249	0.446067	0.822511	0.356742	0.404683	0.37954	141	TG	154.974	0.2248	175	419533
categorical-20002-both_sexes-1420	Non-cancer illness code, self-reported	-0.319455	0.256199	0.214515	-0.957128	0.443464	0.0326222	-0.595673	0.370092	0.109753	141	TG	181.477	0.0145	203	420270
icd10-D50-both_sexes	D50 Iron deficiency anaemia	-0.0554619	0.0445148	0.214874	-0.0215521	0.0778487	0.782309	-0.0177136	0.0512625	0.730202	141	TG	270.441	0.0001	10483	410048
categorical-20002-both_sexes-1287	Non-cancer illness code, self-reported	0.0603557	0.0484511	0.214953	-0.0336603	0.0842419	0.690088	-0.00451157	0.0722174	0.950276	141	TG	180.862	0.0159	5800	414673
phecode-569.1-both_sexes	Toxic gastroenteritis and colitis	0.251406	0.201908	0.215157	0.483077	0.35229	0.172508	0.295566	0.323387	0.362303	141	TG	147.815	0.3583	266	383086
phecode-707-both_sexes	Chronic ulcer of skin	-0.082027	0.0659287	0.215513	0.0959941	0.113894	0.400769	0.0909769	0.0960622	0.345238	141	TG	168.432	0.0698	2884	417647
phecode-755.6-both_sexes	Other congenital anomalies of lower limb, including pelvic girdle	-0.26828	0.215858	0.216	0.145231	0.375402	0.699445	-0.0186955	0.373785	0.96018	141	TG	119	0.9226	187	419170
phecode-592.13-both_sexes	Chronic interstitial cystitis	-0.212047	0.170734	0.216324	-0.133611	0.298976	0.655645	-0.442636	0.299102	0.141152	141	TG	119.968	0.9129	303	386584
phecode-803.3-both_sexes	Fracture of clavicle or scapula	0.0871647	0.0702364	0.216674	0.0546781	0.123007	0.657364	0.236154	0.113697	0.0396237	141	TG	139.31	0.5439	2097	395047
icd10-C16-both_sexes	C16 Malignant neoplasm of stomach	-0.155753	0.125742	0.217665	-0.313961	0.216906	0.150158	-0.201867	0.19085	0.292114	133	TG	149.617	0.1685	764	419767
categorical-20544-both_sexes-15	Mental health problems ever diagnosed by a professional	0.0358636	0.0289893	0.21811	-0.0580144	0.0497599	0.245657	0.00227922	0.0397801	0.954391	141	TG	183.862	0.0114	19338	116659
phecode-189.4-both_sexes	Malignant neoplasm of other urinary organs	0.304923	0.246662	0.218457	0.15448	0.431676	0.720989	0.160439	0.367216	0.662853	141	TG	156.74	0.1948	190	415431
phecode-340.1-both_sexes	Migrain with aura	-0.240268	0.194384	0.218509	0.0486554	0.338802	0.886016	-0.321506	0.314154	0.307883	141	TG	141.435	0.4929	275	407934
icd10-R65-both_sexes	R65 Systemic Inflammatory Response Syndrome [SIRS]	-0.228807	0.185258	0.218873	0.0781701	0.322878	0.809056	-0.196314	0.292706	0.503524	141	TG	159.304	0.1602	340	420191
icd10-C84-both_sexes	C84 Peripheral and cutaneous T-cell lymphomas	-0.359885	0.291569	0.219157	0.197823	0.507104	0.697058	0.165903	0.430672	0.700659	141	TG	174.699	0.035	151	420380
phecode-191.11-both_sexes	Cancer of brain	0.160533	0.130063	0.219171	0.00069914	0.227073	0.997548	0.226782	0.19691	0.251408	141	TG	153.831	0.244	670	418389
phecode-451.2-both_sexes	Phlebitis and thrombophlebitis of lower extremities	-0.0707946	0.0574115	0.219602	-0.046715	0.100446	0.642607	-0.141623	0.080422	0.0804212	141	TG	191.959	0.0033	4417	376206
phecode-742.1-both_sexes	Loose body in joint	0.208116	0.168793	0.219656	-0.200424	0.292386	0.494184	0.23859	0.265844	0.371003	141	TG	149.243	0.3307	385	413456
phecode-341-both_sexes	Other demyelinating diseases of central nervous system	-0.217088	0.176203	0.22	0.117786	0.306559	0.701402	0.0273318	0.288237	0.92459	141	TG	150.634	0.3057	356	403249
icd10-A02-both_sexes	A02 Other Salmonella infections	0.327231	0.265758	0.22027	0.83822	0.462153	0.0718766	0.605429	0.486061	0.214999	141	TG	107.569	0.9874	112	420419
phecode-840-both_sexes	Sprains and strains	0.196492	0.159623	0.220397	0.00635842	0.279069	0.981855	-0.045472	0.230909	0.844171	141	TG	194.686	0.0024	566	419939
icd10-X49-both_sexes	X49 Accidental poisoning by and exposure to other and unspecified chemicals and noxious substances	-0.294104	0.239419	0.221355	-0.544212	0.418524	0.195646	-0.114032	0.392273	0.771714	141	TG	141.763	0.4867	181	420350
phecode-726-both_sexes	Peripheral enthesopathies and allied syndromes	-0.0372355	0.0303239	0.221535	-0.0177486	0.0530288	0.738358	-0.0462249	0.0417261	0.26984	141	TG	208.435	0.0001	17969	386932
categorical-20002-both_sexes-1648	Non-cancer illness code, self-reported	0.227343	0.185183	0.221633	0.27325	0.323763	0.40013	0.0958857	0.311139	0.758406	141	TG	122.709	0.8754	263	420210
phecode-170-both_sexes	Cancer of bone and connective tissue	0.147459	0.120374	0.22263	0.1535	0.210698	0.467514	0.0877494	0.219549	0.690001	141	TG	109.439	0.982	554	419977
phecode-286.6-both_sexes	Defibrination syndrome	0.118999	0.097306	0.223407	0.0934117	0.170167	0.583927	0.155062	0.153877	0.315335	141	TG	154.568	0.2306	1200	416975
icd10-N71-both_sexes	N71 Inflammatory disease of uterus, except cervix	-0.254149	0.20782	0.223412	-0.497661	0.362733	0.172281	-0.348717	0.316533	0.272492	141	TG	175.671	0.0309	299	420232
categorical-20002-both_sexes-1482	Non-cancer illness code, self-reported	-0.101419	0.0829598	0.223568	0.036626	0.144518	0.800306	0.0342315	0.130335	0.793212	141	TG	175.784	0.0308	1882	418591
phecode-681-both_sexes	Superficial cellulitis and abscess	-0.0477138	0.0390584	0.223911	0.0156045	0.0680694	0.819016	-0.0568324	0.0561249	0.312996	141	TG	179.157	0.0196	9035	406937
categorical-20002-both_sexes-1406	Non-cancer illness code, self-reported	-0.0800017	0.065601	0.224698	-0.0586217	0.114807	0.610433	-0.0379256	0.0918404	0.680274	141	TG	175.066	0.0332	3026	417447
phecode-871.3-both_sexes	Open wound of foot except toe(s) alone	0.219526	0.18003	0.224748	0.202345	0.315096	0.521821	0.235345	0.298745	0.432157	141	TG	147.008	0.3748	333	400468
icd10-Q39-both_sexes	Q39 Congenital malformations of oesophagus	-0.349637	0.286739	0.224759	-1.15534	0.49469	0.0209489	-0.442322	0.519814	0.396265	141	TG	114.408	0.9586	102	420429
phecode-369-both_sexes	Infection of the eye	-0.135599	0.11132	0.225235	0.466287	0.184685	0.0127008	0.0926431	0.185266	0.617822	141	TG	131.504	0.7202	783	409073
phecode-805-both_sexes	Fracture of vertebral column without mention of spinal cord injury	-0.0862458	0.0708419	0.225485	-0.125944	0.123965	0.311412	-0.0406088	0.107109	0.705161	141	TG	145.306	0.4081	2157	395047
icd10-Q24-both_sexes	Q24 Other congenital malformations of heart	0.304527	0.25019	0.225583	-0.170465	0.434887	0.695677	-0.321585	0.418639	0.44368	141	TG	149.957	0.3166	174	420357
phecode-433.3-both_sexes	Cerebral ischemia	0.0612171	0.0502961	0.2256	0.143448	0.0876494	0.103974	0.0883322	0.0704329	0.211884	141	TG	190.122	0.0044	5687	407633
phecode-303-both_sexes	Psychogenic and somatoform disorders	0.17635	0.144964	0.225837	0.18144	0.253827	0.475921	0.127623	0.213086	0.55019	141	TG	164.617	0.0973	577	369930
phecode-695.1-both_sexes	Toxic erythema	-0.333658	0.274662	0.226489	0.956397	0.462535	0.0405197	-0.0882369	0.472332	0.852079	141	TG	134.884	0.6476	131	412638
icd10-G60-both_sexes	G60 Hereditary and idiopathic neuropathy	0.272023	0.224058	0.226763	0.232392	0.391972	0.554226	0.240304	0.365564	0.512034	141	TG	131.862	0.7122	193	420338
icd10-I67-both_sexes	I67 Other cerebrovascular diseases	0.066037	0.0544012	0.226834	0.147257	0.0948627	0.122861	0.127033	0.0848622	0.136661	141	TG	136.19	0.6156	3468	417063
phecode-624.9-females	stress incontinence, female	0.0584663	0.0482232	0.227398	-0.0390216	0.0838277	0.642304	0.140037	0.0694414	0.0456472	141	TG	194.532	0.0025	6473	216940
icd10-C26-both_sexes	C26 Malignant neoplasm of other and ill-defined digestive organs	-0.205168	0.169399	0.227877	-0.420928	0.295793	0.156963	-0.0480926	0.289594	0.868342	141	TG	127.052	0.8089	328	420203
icd10-T84-both_sexes	T84 Complications of internal orthopaedic prosthetic devices, implants and grafts	-0.0541334	0.0447271	0.228202	0.071209	0.0771989	0.357913	-0.0728168	0.0685426	0.289902	141	TG	158.815	0.1662	6006	414525
phecode-611.3-both_sexes	Lump or mass in breast	-0.0972346	0.0805482	0.229406	-0.0704696	0.140938	0.617863	-0.145568	0.128275	0.258394	141	TG	142.717	0.4644	1639	412667
phecode-338.2-both_sexes	Chronic pain	-0.166358	0.137851	0.229544	-0.0489996	0.241017	0.839195	0.100831	0.234536	0.667918	141	TG	122.08	0.8857	474	419595
icd10-T59-both_sexes	T59 Toxic effect of other gases, fumes and vapours	0.375987	0.312045	0.23027	1.08438	0.541962	0.0473577	0.798007	0.510481	0.120253	141	TG	141.668	0.4878	107	420424
icd10-S10-both_sexes	S10 Superficial injury of neck	0.361695	0.300305	0.230457	0.402009	0.525815	0.445838	-0.049315	0.462919	0.915314	141	TG	157.96	0.1774	129	420402
phecode-910-both_sexes	Superficial injury, infected	0.28728	0.238847	0.231093	-0.396039	0.414836	0.341392	0.202628	0.402097	0.615105	141	TG	113.896	0.9615	146	420385
phecode-514-both_sexes	Abnormal findings examination of lungs	-0.0674354	0.0561175	0.231515	-0.15588	0.0978664	0.11348	-0.116835	0.0898835	0.195788	141	TG	137.662	0.5821	3331	417168
phecode-427.6-both_sexes	Premature beats	0.135638	0.112941	0.231793	0.0662815	0.197581	0.737779	0.0355404	0.200816	0.85978	141	TG	133.665	0.6755	771	384657
icd10-S19-both_sexes	S19 Other and unspecified injuries of neck	0.277678	0.231537	0.232443	-0.0569548	0.403855	0.888052	0.255784	0.416725	0.540347	141	TG	111.133	0.9757	152	420379
icd10-H53-both_sexes	H53 Visual disturbances	0.0714812	0.059695	0.233158	0.0945159	0.104454	0.367107	0.0530766	0.0873608	0.544466	141	TG	186.382	0.009	3872	416659
icd10-W11-both_sexes	W11 Fall on and from ladder	0.1065	0.0889569	0.233248	0.260831	0.154919	0.0944911	0.118512	0.135286	0.382524	141	TG	166.451	0.0834	1568	418963
phecode-512.1-both_sexes	Wheezing	-0.219936	0.183972	0.233917	-0.537751	0.320353	0.0954729	-0.401504	0.290635	0.169335	141	TG	148.177	0.3524	319	404844
categorical-20002-both_sexes-1455	Non-cancer illness code, self-reported	-0.351975	0.294609	0.234216	-0.575729	0.515257	0.265767	-1.10805	0.478928	0.0221458	141	TG	157.074	0.1908	132	420341
phecode-008-both_sexes	Intestinal infection	0.0359103	0.0301527	0.235689	0.00235169	0.0526761	0.964455	0.0370859	0.0480711	0.441723	141	TG	153.681	0.2476	13044	407487
categorical-20002-both_sexes-1201	Non-cancer illness code, self-reported	-0.0830974	0.0698496	0.236193	-0.132463	0.122142	0.280021	-0.132688	0.106318	0.214101	141	TG	166.273	0.0849	2542	417931
phecode-871.2-both_sexes	Open wound of finger(s)	0.381209	0.321182	0.23728	0.544352	0.564765	0.336792	0.538271	0.484844	0.268819	141	TG	155.613	0.2137	113	400468
phecode-241-both_sexes	Nontoxic nodular goiter	-0.111749	0.0941565	0.237299	-0.0229855	0.164553	0.889111	-0.0781587	0.136739	0.568516	141	TG	163.929	0.1037	1382	399034
icd10-I89-both_sexes	I89 Other non-infective disorders of lymphatic vessels and lymph nodes	-0.114817	0.0967925	0.237547	-0.149215	0.169343	0.379765	-0.0330194	0.163082	0.839843	141	TG	120.47	0.9058	948	419583
phecode-323-both_sexes	Encephalitis	0.191844	0.161986	0.23829	0.453579	0.28226	0.110334	0.432755	0.253273	0.0897315	141	TG	154.988	0.224	436	419234
icd10-S82-both_sexes	S82 Fracture of lower leg, including ankle	-0.129342	0.109236	0.238394	0.231866	0.187542	0.218417	0.0496831	0.157583	0.753017	141	TG	175.451	0.0318	1090	419441
icd10-F12-both_sexes	F12 Mental and behavioural disorders due to use of cannabinoids	0.321691	0.271695	0.238413	-0.24219	0.472377	0.608972	0.169825	0.40653	0.676776	141	TG	171.495	0.0504	171	420360
categorical-20002-both_sexes-1548	Non-cancer illness code, self-reported	0.278901	0.236154	0.239598	1.12349	0.403863	0.00615573	0.25163	0.33784	0.457628	141	TG	185.901	0.0097	246	420227
icd10-C71-both_sexes	C71 Malignant neoplasm of brain	0.154164	0.130574	0.239736	-0.00947862	0.227948	0.966891	0.199434	0.208681	0.340876	141	TG	154.084	0.2393	666	419865
icd10-H25-both_sexes	H25 Senile cataract	-0.0413742	0.0351596	0.24129	0.0778002	0.0603005	0.199121	0.0126239	0.0489637	0.796924	141	TG	189.543	0.0048	12419	408112
icd10-Z04-both_sexes	Z04 Examination and observation for other reasons	-0.0927717	0.0788493	0.241364	-0.194232	0.137847	0.161058	-0.119209	0.120281	0.323354	141	TG	162.702	0.1166	1975	418556
categorical-20002-both_sexes-1452	Non-cancer illness code, self-reported	0.0429545	0.0365305	0.24165	0.0306421	0.0639052	0.632341	-0.00606108	0.0541429	0.911027	141	TG	184.596	0.0105	10815	409658
phecode-420.21-both_sexes	Acute pericarditis	-0.23126	0.196759	0.241851	0.148655	0.342307	0.664763	0.00467398	0.311609	0.988054	141	TG	133.98	0.6688	255	416313
phecode-250.23-both_sexes	Type 2 diabetes with ophthalmic manifestations	-0.136678	0.116386	0.242251	-0.414157	0.201651	0.0418664	0.0904401	0.155026	0.56057	141	TG	240.621	0.0001	1332	396181
phecode-478-both_sexes	Throat pain	0.190717	0.162533	0.242625	0.155128	0.284575	0.586544	0.0947227	0.255932	0.711861	141	TG	155.201	0.2203	431	398757
phecode-771.1-both_sexes	Swelling of limb	-0.0583424	0.049723	0.242648	0.0134937	0.0867359	0.876596	-0.0423856	0.068646	0.53794	141	TG	190.087	0.0047	5816	413764
phecode-427.8-both_sexes	Sinoatrial node dysfunction (Bradycardia)	-0.153625	0.130948	0.242717	-0.136181	0.229149	0.553282	-0.0658324	0.22137	0.766613	141	TG	139.118	0.5505	597	384657
phecode-513.4-both_sexes	Hyperventilation	-0.203514	0.173612	0.243096	-0.127755	0.303799	0.674751	-0.0681679	0.28658	0.812332	141	TG	125.715	0.8302	306	408978
icd10-F17-both_sexes	F17 Mental and behavioural disorders due to use of tobacco	0.0403849	0.0344884	0.2436	0.0171229	0.0603411	0.77701	-0.0169013	0.0469825	0.719586	141	TG	211.204	0.0001	14937	405594
icd10-S09-both_sexes	S09 Other and unspecified injuries of head	-0.0885218	0.0757251	0.244394	0.0379253	0.132012	0.774321	-0.0401062	0.108632	0.712541	141	TG	179.621	0.0185	2334	418197
phecode-227.1-both_sexes	Benign neoplasm of adrenal gland	0.257374	0.220173	0.244405	0.122899	0.385033	0.750062	0.294349	0.337932	0.385229	141	TG	161.399	0.1326	243	418625
categorical-20002-both_sexes-1234	Non-cancer illness code, self-reported	-0.58113	0.497136	0.244408	0.40569	0.862285	0.638748	0.435241	0.421782	0.303894	141	TG	545.832	0.0001	163	420310
phecode-691-both_sexes	Congenital anomalies of skin	-0.30079	0.257745	0.245192	-0.108445	0.450762	0.810235	-0.157551	0.438323	0.719808	141	TG	133.497	0.6797	148	412638
phecode-426.24-both_sexes	Atrioventricular block, complete	0.13196	0.113148	0.245493	-0.219847	0.194589	0.260506	-0.0873916	0.189745	0.64582	141	TG	146.964	0.3752	841	384657
phecode-501-both_sexes	Pneumonitis due to inhalation of food or vomitus	-0.116616	0.100069	0.245856	-0.42661	0.172309	0.0144936	-0.180821	0.169474	0.287829	141	TG	130.498	0.7398	958	404684
categorical-20002-both_sexes-1297	Non-cancer illness code, self-reported	0.0711158	0.0610472	0.246028	-0.0210361	0.106383	0.843538	0.0185365	0.0878067	0.833111	141	TG	165.397	0.0915	3309	417164
icd10-C92-both_sexes	C92 Myeloid leukaemia	-0.161551	0.139003	0.247127	-0.38542	0.242141	0.11372	-0.302075	0.211358	0.155172	141	TG	149.014	0.3346	567	419964
icd10-J20-both_sexes	J20 Acute bronchitis	0.260385	0.224117	0.247283	-0.242966	0.388654	0.532899	-0.0818057	0.340152	0.810297	141	TG	143.076	0.4577	208	420323
icd10-C85-both_sexes	C85 Other and unspecified types of non-Hodgkin's lymphoma	-0.131996	0.11368	0.247571	0.227509	0.195448	0.246404	-0.134181	0.135597	0.324098	141	TG	256.764	0.0001	1481	419050
icd10-Z84-both_sexes	Z84 Family history of other conditions	0.242105	0.208625	0.247829	0.78229	0.360986	0.0319316	0.538445	0.3586	0.135473	141	TG	115.392	0.9537	195	420336
phecode-276.41-both_sexes	Acidosis	-0.0918035	0.0792008	0.248379	-0.041384	0.138535	0.765595	-0.0992457	0.132844	0.456264	141	TG	137.098	0.5949	1629	409482
phecode-430-both_sexes	Intracranial hemorrhage	0.0907526	0.0783521	0.248727	-0.125294	0.135357	0.356229	-0.0506612	0.111225	0.649466	141	TG	201.738	0.0006	2437	407633
phecode-430.3-both_sexes	Subdural hemorrhage	-0.198338	0.171442	0.249291	-0.361219	0.299653	0.230075	-0.56206	0.267602	0.0374906	141	TG	151.304	0.2919	379	407633
icd10-I05-both_sexes	I05 Rheumatic mitral valve diseases	0.183937	0.159372	0.250412	-0.151238	0.276931	0.585859	0.0208774	0.234473	0.929178	141	TG	139.978	0.5264	409	420122
icd10-K81-both_sexes	K81 Cholecystitis	-0.0790485	0.0685454	0.250782	-0.150545	0.11978	0.210917	-0.15954	0.0978229	0.105157	141	TG	196.137	0.0016	3146	417385
categorical-20002-both_sexes-1158	Non-cancer illness code, self-reported	-0.216851	0.188181	0.251141	-0.159626	0.32976	0.6291	-0.0538437	0.306404	0.860762	141	TG	143.989	0.4361	300	420173
phecode-197-both_sexes	Chemotherapy	-0.0431569	0.0374516	0.251147	0.094188	0.0639701	0.14318	0.000538105	0.0495738	0.991355	141	TG	218.871	0.0001	12156	367856
icd10-Y53-both_sexes	Y53 Agents primarily affecting the gastro-intestinal system	-0.309733	0.268866	0.251285	-0.0704932	0.469994	0.880992	-0.36411	0.440693	0.410085	141	TG	157.489	0.1843	159	420372
categorical-20001-both_sexes-1024	Cancer code, self-reported	0.295761	0.257171	0.252082	0.67985	0.448525	0.131855	0.880504	0.420742	0.038177	141	TG	138.301	0.5692	154	420319
phecode-726.2-both_sexes	Synoviopathy	0.176402	0.15344	0.25225	0.446521	0.267045	0.0967578	0.426052	0.265558	0.110888	141	TG	134.58	0.6562	417	386932
phecode-586.1-both_sexes	Anatomical abnormatilies of kidney and ureters	0.216242	0.188112	0.252295	0.818122	0.323351	0.0125166	0.356662	0.306737	0.246904	141	TG	132.255	0.7047	275	401927
icd10-Z83-both_sexes	Z83 Family history of other specific disorders	-0.0772897	0.0674661	0.253912	-0.0475235	0.117988	0.687728	0.0319757	0.100703	0.751319	141	TG	179.862	0.018	2933	417598
phecode-1100-both_sexes	Family history	-0.0772897	0.0674661	0.253912	-0.0475235	0.117988	0.687728	0.0319757	0.101603	0.753449	141	TG	179.862	0.018	2933	417598
phecode-245.2-both_sexes	Chronic thyroiditis	-0.289739	0.253358	0.254743	0.465563	0.436326	0.287818	0.264307	0.334416	0.430658	141	TG	231.675	0.0001	265	399034
phecode-295.1-both_sexes	Schizophrenia	-0.143796	0.125752	0.254788	-0.410076	0.218456	0.0625926	-0.333855	0.205455	0.106421	141	TG	150.574	0.3065	701	369930
phecode-212-both_sexes	Benign neoplasm of respiratory and intrathoracic organs	-0.182536	0.160059	0.256055	-0.386265	0.279418	0.169069	-0.0207382	0.258019	0.936054	141	TG	141.157	0.4991	405	420126
icd10-X50-both_sexes	X50 Overexertion and strenuous or repetitive movements	0.0976869	0.0857074	0.256328	-0.0145348	0.149564	0.922722	0.202487	0.144504	0.16335	141	TG	123.949	0.8567	1246	419285
phecode-1001-both_sexes	Foreign body injury	0.090521	0.0794565	0.256544	0.145901	0.139081	0.295982	0.0322374	0.1294	0.803626	141	TG	124.689	0.8448	1464	419067
phecode-198.4-both_sexes	Secondary malignant neoplasm of liver	-0.0616037	0.054079	0.256589	-0.186571	0.0937985	0.048657	-0.137231	0.0859963	0.112793	141	TG	140.162	0.5241	3632	367856
phecode-858-both_sexes	Complication of internal orthopedic device	-0.0514043	0.0451303	0.25664	0.0879668	0.0776585	0.259274	-0.023765	0.0681584	0.727859	141	TG	167.834	0.0748	6262	390518
phecode-446.4-both_sexes	Wegener's granulomatosis	0.26184	0.229914	0.256707	0.380736	0.40227	0.345552	0.0911175	0.352786	0.796571	141	TG	155.288	0.219	217	408565
phecode-1006-both_sexes	Crushing injury	-0.140479	0.123537	0.257424	-0.629965	0.211172	0.00337034	-0.473635	0.207228	0.0237812	141	TG	136.21	0.6164	666	419865
icd10-M76-both_sexes	M76 Enthesopathies of lower limb, excluding foot	-0.212009	0.186462	0.257478	0.107976	0.32472	0.739998	-0.135365	0.319585	0.672534	141	TG	120.943	0.9002	256	420275
icd10-G83-both_sexes	G83 Other paralytic syndromes	0.156246	0.13747	0.257654	-0.379764	0.234274	0.107279	-0.0483021	0.234277	0.836954	141	TG	120.889	0.8998	470	420061
categorical-20002-both_sexes-1433	Non-cancer illness code, self-reported	-0.302488	0.266211	0.257785	-0.770905	0.463506	0.0985247	-0.334238	0.432775	0.44123	141	TG	137.667	0.5814	143	420330
icd10-G62-both_sexes	G62 Other polyneuropathies	0.0849938	0.0748431	0.258053	0.221076	0.130226	0.0918138	0.160084	0.117909	0.176745	141	TG	129.368	0.7626	1717	418814
categorical-6152-both_sexes-9	Blood clot, DVT, bronchitis, emphysema, asthma, rhinitis, eczema, allergy diagnosed by doctor	0.0270272	0.0238417	0.258895	0.0777127	0.041388	0.0625229	0.0397234	0.0260667	0.129786	141	TG	472.396	0.0001	96547	323221
phecode-290.1-both_sexes	Dementias	0.198015	0.174716	0.259002	0.122616	0.305804	0.689063	0.0154098	0.119438	0.897528	141	TG	796.824	0.0001	1974	410833
phecode-327.3-both_sexes	Sleep apnea	0.0589359	0.0520023	0.259011	0.0644039	0.0910234	0.480407	0.0762646	0.0754366	0.313772	141	TG	197.868	0.0012	5621	413908
phecode-217.1-both_sexes	Nevus, non-neoplastic	0.144878	0.127858	0.259101	-0.219621	0.220791	0.321611	-0.0765522	0.202088	0.705406	141	TG	154.107	0.2393	698	409694
phecode-374.3-both_sexes	Ptosis of eyelid	0.0728259	0.0642999	0.259319	0.0964917	0.112507	0.392562	0.199958	0.105346	0.0597397	141	TG	123.819	0.8597	2257	409073
icd10-B18-both_sexes	B18 Chronic viral hepatitis	-0.213725	0.189286	0.260782	0.0536711	0.330282	0.871147	-0.174779	0.277948	0.530492	141	TG	183.12	0.0122	375	420156
phecode-241.1-both_sexes	Nontoxic uninodular goiter	-0.136372	0.120898	0.261252	-0.453293	0.209015	0.0318059	-0.143865	0.215014	0.504538	141	TG	120.41	0.9077	604	399034
phecode-350-both_sexes	Abnormal movement	-0.0586338	0.0519901	0.261339	0.0509368	0.0903025	0.573616	-0.0871682	0.0813314	0.28567	141	TG	162.588	0.1188	4510	415922
icd10-M51-both_sexes	M51 Other intervertebral disk disorders	-0.049153	0.043719	0.262812	-0.00382332	0.0763672	0.960142	-0.0356553	0.0556367	0.522662	141	TG	223.146	0.0001	9053	411478
icd10-I62-both_sexes	I62 Other nontraumatic intracranial haemorrhage	-0.177789	0.158159	0.262888	-0.257354	0.276784	0.354086	-0.332138	0.242399	0.172815	141	TG	180.718	0.0157	534	419997
categorical-20002-both_sexes-1544	Non-cancer illness code, self-reported	-0.200774	0.178708	0.263159	-0.13764	0.312622	0.660421	-0.243073	0.305167	0.427076	141	TG	126.92	0.8108	292	420181
phecode-509-both_sexes	Respiratory failure, insufficiency, arrest	-0.0708837	0.0631111	0.263293	0.0958473	0.109149	0.381387	-0.174669	0.0938511	0.064823	141	TG	196.936	0.0013	3756	404684
phecode-603.1-males	Hydrocele	-0.0893897	0.0796539	0.263687	-0.0350818	0.139346	0.801598	-0.0841195	0.127973	0.512051	141	TG	135.439	0.6334	1605	169119
phecode-286.1-both_sexes	Congenital coagulation defects	0.149638	0.133685	0.264916	-0.0298614	0.23298	0.898198	0.101358	0.214591	0.637425	141	TG	133.087	0.6884	543	416975
icd10-O44-both_sexes	O44 Placenta praevia	-0.0807969	0.0721884	0.26495	0.0648994	0.125468	0.605797	0.0628768	0.100991	0.534562	141	TG	208.004	0.0001	185	420346
phecode-290-both_sexes	Delirium dementia and amnestic and other cognitive disorders	0.12927	0.115511	0.26501	0.102551	0.202243	0.612908	-0.0142037	0.0879004	0.871863	141	TG	611.766	0.0001	3500	410833
icd10-T38-both_sexes	T38 Poisoning by hormones and their synthetic substitutes and antagonists, not elsewhere classified	-0.261101	0.233337	0.265062	-0.447919	0.407955	0.27412	-0.581172	0.373604	0.122065	141	TG	136.081	0.6205	184	420347
phecode-624-females	Symptoms involving female genital tract	-0.10475	0.0936154	0.26508	-0.048026	0.16391	0.769957	-0.201588	0.161046	0.212751	141	TG	118.318	0.9293	1000	216940
phecode-722-both_sexes	Intervertebral disc disorders	-0.049235	0.0440058	0.265129	-0.0758616	0.0769808	0.32611	-0.156414	0.060061	0.010201	141	TG	209.892	0.0001	8377	401917
icd10-S43-both_sexes	S43 Dislocation, sprain and strain of joints and ligaments of shoulder girdle	-0.148967	0.133167	0.265208	-0.0363499	0.232876	0.876188	0.0914621	0.220117	0.6784	141	TG	138.671	0.5573	576	419955
icd10-X45-both_sexes	X45 Accidental poisoning by and exposure to alcohol	-0.304608	0.272593	0.265718	-0.333086	0.477946	0.487022	-0.0787538	0.42168	0.852118	141	TG	149.893	0.3185	149	420382
icd10-K63-both_sexes	K63 Other diseases of intestine	-0.0341033	0.0305195	0.265727	-0.0399476	0.0534278	0.455909	-0.0889444	0.040769	0.0308031	141	TG	216.093	0.0001	18716	401815
phecode-665-females	Obstetrical/birth trauma	-0.0534315	0.0478167	0.265727	0.117791	0.081753	0.151884	-0.0642936	0.0778971	0.410568	141	TG	145.038	0.4149	5568	219193
phecode-597-both_sexes	Other disorders of urethra and urinary tract	0.0610414	0.0546301	0.265754	-0.0544328	0.094972	0.567472	0.075144	0.0795247	0.346331	141	TG	205.889	0.0001	5212	403310
icd10-W23-both_sexes	W23 Caught, crushed, jammed or pinched in or between objects	-0.11274	0.100988	0.266173	-0.154507	0.176723	0.383467	-0.161338	0.164192	0.327491	141	TG	132.567	0.6965	958	419573
phecode-159.3-both_sexes	Malignant neoplasm of gallbladder and extrahepatic bile ducts	0.192568	0.17281	0.267046	-0.339722	0.297488	0.255431	0.160586	0.305704	0.600206	141	TG	117.021	0.9411	289	400294
phecode-227-both_sexes	Benign neoplasm of other endocrine glands and related structures	0.111199	0.100014	0.268117	0.0256303	0.174777	0.883624	0.198352	0.157433	0.209796	141	TG	150.781	0.3015	1109	418625
phecode-070.9-both_sexes	Hepatitis NOS	-0.163751	0.14729	0.268148	-0.0787741	0.257919	0.760502	0.00291994	0.210312	0.988942	141	TG	181.993	0.0139	619	413496
icd10-R27-both_sexes	R27 Other lack of coordination	0.174211	0.156889	0.268727	0.15321	0.274474	0.577609	0.107824	0.230083	0.640062	141	TG	152.905	0.2598	459	420072
phecode-695.3-both_sexes	Rosacea	-0.216302	0.195173	0.269652	-0.0372333	0.341266	0.913278	-0.120303	0.266065	0.651856	141	TG	207.809	0.0001	401	412638
phecode-618-females	Genital prolapse	0.0462722	0.0419054	0.271399	0.0243208	0.0733067	0.740565	0.0503146	0.0504408	0.320244	141	TG	286.812	0.0001	13508	213696
icd10-S56-both_sexes	S56 Injury of muscle and tendon at forearm level	0.218291	0.197732	0.271498	0.169371	0.346064	0.625314	0.109002	0.302857	0.719454	141	TG	148.424	0.3447	280	420251
phecode-427.7-both_sexes	Tachycardia NOS	-0.0643232	0.0583322	0.272048	0.0249276	0.101706	0.806744	-0.0203327	0.0946746	0.830264	141	TG	136.687	0.6043	3007	384657
icd10-M66-both_sexes	M66 Spontaneous rupture of synovium and tendon	-0.223901	0.203073	0.272108	-0.459179	0.354581	0.197471	-0.525263	0.351526	0.137365	141	TG	127.401	0.8036	227	420304
icd10-L71-both_sexes	L71 Rosacea	-0.215354	0.195804	0.273287	-0.0397801	0.342382	0.907673	-0.12478	0.273927	0.64944	141	TG	208.884	0.0001	400	420131
phecode-522-both_sexes	Diseases of pulp and periapical tissues	-0.0671361	0.0610813	0.273599	-0.117083	0.106759	0.274666	-0.0584855	0.0995153	0.557678	141	TG	135.146	0.6398	2683	408157
phecode-626.8-females	Infertility, female	-0.0917278	0.0834679	0.273672	-0.074261	0.146374	0.612723	0.0420688	0.137926	0.760811	141	TG	130.354	0.7432	1431	194287
phecode-366.2-both_sexes	Senile cataract	-0.0393419	0.0358076	0.273784	0.0841273	0.0613703	0.172642	0.0218531	0.0471636	0.643836	141	TG	195.654	0.0021	12419	392711
phecode-627.3-females	Postmenopausal atrophic vaginitis	-0.101678	0.0926955	0.274568	-0.103034	0.162249	0.52645	-0.103769	0.141057	0.46317	141	TG	153.854	0.2435	1331	194287
icd10-K26-both_sexes	K26 Duodenal ulcer	0.0645206	0.0588212	0.274571	-0.0357234	0.102519	0.728026	-0.0911998	0.085908	0.290246	141	TG	166.833	0.0813	3659	416872
icd10-H06-both_sexes	H06 Disorders of lachrymal system and orbit in diseases classified elsewhere	-0.413734	0.37744	0.274891	0.302152	0.65555	0.645581	0.0060819	0.438955	0.988965	141	TG	279.669	0.0001	145	420386
phecode-305.2-both_sexes	Eating disorder	0.27452	0.25048	0.274971	0.00814844	0.437196	0.985157	-0.0140077	0.469083	0.97622	141	TG	102.634	0.9947	120	369930
phecode-343-both_sexes	Infantile cerebral palsy	-0.245207	0.223937	0.275405	-0.336989	0.392057	0.391523	-0.0697176	0.40346	0.863059	141	TG	114.51	0.9582	168	403249
phecode-184.1-females	Malignant neoplasm of ovary and other uterine adnexa	0.0956476	0.0873973	0.275659	0.0239156	0.152803	0.875856	0.0694453	0.14468	0.631983	141	TG	123.815	0.86	1199	207089
phecode-367.8-both_sexes	Hypermetropia	0.186106	0.170134	0.275885	0.271433	0.297746	0.363543	0.447354	0.278984	0.111075	141	TG	135.369	0.633	345	416775
phecode-618.1-females	Prolapse of vaginal walls	0.0459913	0.0420531	0.275987	0.0262783	0.0735655	0.721477	0.0516086	0.0497109	0.300978	141	TG	284.591	0.0001	13275	213696
categorical-20002-both_sexes-1472	Non-cancer illness code, self-reported	-0.262188	0.240119	0.276748	-0.102936	0.419948	0.806729	0.0447827	0.379004	0.906111	141	TG	146.017	0.3924	179	420294
phecode-738.4-both_sexes	Acquired spondylolisthesis	0.078375	0.0718084	0.276951	0.293467	0.123643	0.0189881	0.155723	0.115031	0.178	141	TG	143.2	0.4547	2073	403527
icd10-Z60-both_sexes	Z60 Problems related to social environment	0.0545774	0.0500362	0.277254	-0.0124345	0.0873522	0.88701	0.0840967	0.088094	0.341413	141	TG	135.798	0.6264	4052	416479
phecode-483-both_sexes	Acute bronchitis and bronchiolitis	0.206379	0.189246	0.277352	-0.164491	0.328869	0.617746	0.29316	0.321436	0.363321	141	TG	130.976	0.7302	269	405999
phecode-253.11-both_sexes	Acromegaly and gigantism	0.347006	0.318258	0.277441	0.164013	0.556588	0.768681	0.0940331	0.521737	0.857232	141	TG	145.356	0.4082	105	415877
icd10-I30-both_sexes	I30 Acute pericarditis	-0.22123	0.202975	0.277614	0.0870062	0.353894	0.806158	-0.0951007	0.343327	0.78219	141	TG	130.458	0.7408	233	420298
phecode-381-both_sexes	Otitis media and Eustachian tube disorders	0.0732897	0.0672834	0.277907	-0.0193708	0.11744	0.869229	0.0788738	0.10545	0.455731	141	TG	151.81	0.2814	2510	416007
phecode-204.22-both_sexes	Myeloid leukemia, chronic	-0.276781	0.254211	0.27812	-0.724978	0.442478	0.103589	-0.339466	0.402629	0.400596	141	TG	150.501	0.3078	171	414840
phecode-705.3-both_sexes	Hidradenitis	0.28453	0.261518	0.278468	-0.488431	0.451225	0.280924	-0.238467	0.36064	0.50955	141	TG	187.945	0.0067	203	409787
icd10-F11-both_sexes	F11 Mental and behavioural disorders due to use of opioids	0.273913	0.252058	0.279034	0.256187	0.441895	0.563024	0.338237	0.452698	0.456221	141	TG	114.557	0.9583	133	420398
phecode-054-both_sexes	Herpes simplex	-0.189025	0.173943	0.279034	0.0784975	0.303412	0.796237	-0.0619508	0.257856	0.810485	141	TG	163.965	0.1028	399	413496
phecode-204.2-both_sexes	Myeloid leukemia	-0.151801	0.139803	0.279424	-0.371609	0.243583	0.129382	-0.383471	0.217623	0.0802369	141	TG	152.281	0.2724	573	414840
phecode-592.1-both_sexes	Cystitis	0.0630783	0.0581502	0.279897	-0.162101	0.0991585	0.104362	-0.0122655	0.0883073	0.889732	141	TG	162.527	0.1182	3565	386584
phecode-741.3-both_sexes	Difficulty in walking	-0.234855	0.216555	0.280005	0.608135	0.368481	0.101122	-0.198861	0.347745	0.568335	141	TG	137.976	0.5742	215	413456
icd10-F50-both_sexes	F50 Eating disorders	0.271051	0.25059	0.281267	0.00742581	0.437434	0.98648	-0.015954	0.483842	0.973743	141	TG	102.645	0.9947	120	420411
phecode-300.8-both_sexes	Acute reaction to stress	-0.262962	0.243241	0.281523	-0.747233	0.422715	0.0793053	-0.569839	0.407727	0.164444	141	TG	122.81	0.8739	153	369930
icd10-T93-both_sexes	T93 Sequelae of injuries of lower limb	-0.111534	0.10333	0.282267	0.148548	0.178845	0.407626	-0.011518	0.170605	0.94627	141	TG	137.128	0.5946	947	419584
phecode-661-females	Fetal distress and abnormal forces of labor	-0.0820019	0.0760001	0.282456	0.0944817	0.131806	0.474685	-0.0785515	0.118229	0.507527	141	TG	161.469	0.1307	2267	219193
categorical-20002-both_sexes-1277	Non-cancer illness code, self-reported	-0.0542783	0.0503305	0.282693	-0.0451713	0.0880483	0.608746	-0.0878779	0.0778934	0.261173	141	TG	142.422	0.4712	4360	416113
categorical-20002-both_sexes-1254	Non-cancer illness code, self-reported	-0.228329	0.212669	0.284832	-0.164805	0.372321	0.658713	0.160447	0.351543	0.648805	141	TG	137.647	0.5821	224	420249
phecode-356-both_sexes	Hereditary and idiopathic peripheral neuropathy	0.238455	0.222359	0.285392	0.235071	0.38911	0.546745	0.256346	0.354745	0.471117	141	TG	134.393	0.6584	200	417332
phecode-433.2-both_sexes	Occlusion of cerebral arteries	-0.0526072	0.0490593	0.285533	0.018541	0.0845471	0.826759	-0.0238979	0.0767754	0.756086	133	TG	155.779	0.0957	5361	407633
categorical-20002-both_sexes-1620	Non-cancer illness code, self-reported	-0.298815	0.278807	0.285671	-0.230932	0.487569	0.6365	-0.276207	0.448482	0.53898	141	TG	122.243	0.8824	115	420358
phecode-286.5-both_sexes	Hemorrhagic disorder due to intrinsic circulating anticoagulants	-0.369499	0.345539	0.286756	-0.779302	0.602941	0.198328	-0.768351	0.50912	0.133508	141	TG	161.262	0.1341	99	416975
phecode-785-both_sexes	Abdominal pain	0.0199672	0.0186836	0.287044	-0.0379364	0.0321554	0.240101	0.000382185	0.0268534	0.988665	141	TG	188.571	0.0056	47295	373236
icd10-Z56-both_sexes	Z56 Problems related to employment and unemployment	-0.262972	0.246171	0.287246	-0.637719	0.429477	0.139841	-0.315761	0.388072	0.417218	141	TG	149.505	0.3261	182	420349
categorical-20002-both_sexes-1530	Non-cancer illness code, self-reported	0.268489	0.252047	0.288605	0.381491	0.440669	0.388142	-0.0476075	0.381866	0.900963	141	TG	154.599	0.2311	179	420294
icd10-T31-both_sexes	T31 Burns classified according to extent of body surface involved	-0.175857	0.165119	0.288695	-0.0926368	0.288941	0.748989	-0.0139284	0.291322	0.961935	141	TG	126.77	0.8126	341	420190
phecode-586.11-both_sexes	Small kidney	0.214512	0.20161	0.289163	0.657581	0.349936	0.0623186	0.06862	0.336063	0.838503	141	TG	130.36	0.7425	236	401927
phecode-250.24-both_sexes	Type 2 diabetes with neurological manifestations	-0.154815	0.146101	0.291132	-0.71586	0.249141	0.00470013	-0.261906	0.186567	0.162588	141	TG	217.722	0.0001	753	396181
phecode-965-both_sexes	Poisoning by analgesics, antipyretics, and antirheumatics	0.0377834	0.0356604	0.291181	0.0200967	0.0623742	0.747789	0.0131206	0.058652	0.823315	141	TG	129.115	0.7675	7832	383239
phecode-564.9-both_sexes	Personal history of diseases of digestive system	0.0244528	0.0231269	0.29218	0.0195395	0.0404893	0.630151	0.0306176	0.0379283	0.420893	141	TG	128.993	0.7717	19790	330270
phecode-599.3-both_sexes	Dysuria	0.106188	0.100434	0.2922	-0.224276	0.172532	0.195782	-0.0792743	0.145272	0.586144	141	TG	191.763	0.0034	1415	395845
phecode-592-both_sexes	Cystitis and urethritis	0.0620842	0.0588092	0.292929	-0.151214	0.100636	0.135217	-0.0807508	0.0920578	0.381894	141	TG	177.586	0.0234	3821	386584
phecode-368-both_sexes	Visual disturbances	0.0608691	0.0577147	0.293399	0.122271	0.100819	0.227272	0.063968	0.081461	0.433629	141	TG	195.61	0.0021	4363	416168
phecode-332-both_sexes	Parkinson's disease	-0.0875342	0.0830292	0.293581	0.0927873	0.144155	0.520856	-0.0887784	0.129627	0.494556	141	TG	152.648	0.2655	1660	403249
icd10-Z85-both_sexes	Z85 Personal history of malignant neoplasm	0.0230927	0.02195	0.294584	0.0161818	0.0384112	0.674203	0.0181009	0.0316749	0.568605	141	TG	177.416	0.0238	30310	390221
icd10-S51-both_sexes	S51 Open wound of forearm	-0.153685	0.146186	0.294933	-0.200606	0.255867	0.434359	-0.143447	0.221186	0.517701	141	TG	169.286	0.0645	583	419948
phecode-962.3-both_sexes	Hormones and synthetic substitutes causing adverse effects in therapeutic use	-0.1667	0.158806	0.295661	-0.119655	0.277885	0.667432	-0.24776	0.250135	0.323636	141	TG	147.823	0.3574	431	383239
icd10-O34-both_sexes	O34 Maternal care for known or suspected abnormality of pelvic organs	-0.097923	0.0932902	0.295683	-0.162893	0.163081	0.319603	-0.0683224	0.148347	0.645831	141	TG	170.727	0.056	1484	419047
icd10-G43-both_sexes	G43 Migraine	-0.0619169	0.0590504	0.296195	-0.0402808	0.103309	0.697203	-0.0561743	0.0932124	0.547718	141	TG	165.92	0.0868	3571	416960
phecode-674-females	Other complications of the puerperium NEC	0.203033	0.193648	0.296232	0.512414	0.337336	0.131033	0.465682	0.320342	0.148267	141	TG	137.654	0.5816	272	226973
icd10-G00-both_sexes	G00 Bacterial meningitis, not elsewhere classified	-0.348295	0.33233	0.296426	0.0997756	0.579515	0.863554	-0.202656	0.485158	0.676799	141	TG	186.257	0.0095	124	420407
phecode-443-both_sexes	Peripheral vascular disease	0.0701932	0.0670395	0.296884	0.271822	0.115533	0.020037	0.170967	0.076075	0.0261816	141	TG	290.199	0.0001	5040	408565
phecode-303.3-both_sexes	Psychogenic disorder	0.183422	0.175292	0.297189	0.196836	0.30693	0.522379	0.347532	0.247182	0.161947	141	TG	174.408	0.0363	419	369930
phecode-010-both_sexes	Tuberculosis	-0.230491	0.220355	0.297364	-0.382601	0.385979	0.323287	-0.456873	0.383973	0.236116	141	TG	124.65	0.8462	189	401597
phecode-149.1-both_sexes	Cancer of oropharynx	0.214868	0.205987	0.298692	-0.0609615	0.359766	0.865691	0.529958	0.299755	0.079244	141	TG	179.128	0.0196	311	418011
phecode-155.1-both_sexes	Malignant neoplasm of liver, primary	-0.299482	0.287113	0.298709	-0.209689	0.503168	0.677513	-0.573503	0.402298	0.15622	141	TG	251.995	0.0001	225	400294
phecode-174.1-females	Breast cancer [female]	0.0363483	0.0348683	0.299002	-0.0264161	0.0606702	0.663944	-0.00471728	0.0449631	0.916594	141	TG	195.562	0.0019	13257	205913
phecode-512.7-both_sexes	Shortness of breath	-0.0437064	0.0420066	0.299917	-0.0161007	0.0734795	0.826879	-0.0688231	0.0634525	0.279946	141	TG	175.7	0.0306	7682	404844
phecode-227.3-both_sexes	Benign neoplasm of pituitary gland and craniopharyngeal duct (pouch)	-0.157323	0.151548	0.30101	0.00269304	0.264642	0.991895	-0.142823	0.260467	0.584336	141	TG	123.671	0.8629	396	418625
icd10-N81-both_sexes	N81 Female genital prolapse	0.0433285	0.0417769	0.301458	0.0279504	0.0730887	0.702735	0.0472763	0.0497241	0.343358	141	TG	277.683	0.0001	13114	407417
icd10-R45-both_sexes	R45 Symptoms and signs involving emotional state	0.0989557	0.0955177	0.301992	-0.230821	0.163746	0.160882	0.0677375	0.179689	0.706766	141	TG	130.094	0.7493	1049	419482
icd10-T00-both_sexes	T00 Superficial injuries involving multiple body regions	-0.309035	0.29844	0.302219	-0.40162	0.522535	0.443436	-0.238134	0.466464	0.610498	141	TG	158.441	0.1709	131	420400
phecode-318-both_sexes	Tobacco use disorder	0.036534	0.0353165	0.302698	0.00475374	0.0617533	0.938751	-0.020018	0.0478836	0.676547	141	TG	220.165	0.0001	14988	392046
categorical-20544-both_sexes-14	Mental health problems ever diagnosed by a professional	0.229522	0.2229	0.304923	0.258118	0.389858	0.509015	0.498048	0.378003	0.189797	141	TG	125.485	0.8338	186	135760
icd10-O04-both_sexes	O04 Medical abortion	0.0999237	0.0971708	0.305568	-0.0433641	0.169581	0.79855	0.128854	0.166078	0.439139	141	TG	138.652	0.5606	1108	419423
icd10-N11-both_sexes	N11 Chronic tubulo-interstitial nephritis	-0.252295	0.246651	0.308126	-0.336823	0.431715	0.436602	-0.288853	0.38794	0.457772	141	TG	146.923	0.3773	171	420360
icd10-A87-both_sexes	A87 Viral meningitis	0.248637	0.243414	0.308801	0.175878	0.425982	0.680333	0.406505	0.390233	0.299347	141	TG	136.921	0.5985	170	420361
icd10-T17-both_sexes	T17 Foreign body in respiratory tract	0.152579	0.149384	0.308832	0.183192	0.2615	0.484758	0.346461	0.253751	0.174331	141	TG	122.511	0.8785	401	420130
categorical-20002-both_sexes-1093	Non-cancer illness code, self-reported	0.0669534	0.0655689	0.308961	0.144916	0.114454	0.207579	0.139142	0.0942183	0.141975	141	TG	201.225	0.0006	3503	416970
icd10-K42-both_sexes	K42 Umbilical hernia	0.0603421	0.0591038	0.309039	0.0696916	0.103425	0.501536	0.0640591	0.0778047	0.41172	141	TG	207.061	0.0001	4511	416020
phecode-250.41-both_sexes	Impaired fasting glucose	0.169212	0.165824	0.309285	-0.0273519	0.289766	0.924933	0.278762	0.26482	0.294317	141	TG	137.838	0.5778	370	396181
icd10-Z01-both_sexes	Z01 Other special examinations and investigations of persons without complaint or reported diagnosis	-0.0591513	0.0580368	0.309865	0.100698	0.100196	0.316639	0.0598485	0.0977574	0.541389	141	TG	121.794	0.889	2692	417839
icd10-X58-both_sexes	X58 Exposure to other specified factors	-0.228889	0.2246	0.309915	-0.486827	0.39231	0.216724	0.0191317	0.408713	0.962732	141	TG	105.239	0.9923	153	420378
icd10-R84-both_sexes	R84 Abnormal findings in specimens from respiratory organs and thorax	0.310054	0.304918	0.310982	0.521094	0.53334	0.330247	0.580403	0.443607	0.192892	141	TG	196.595	0.0014	155	420376
phecode-208-both_sexes	Benign neoplasm of colon	-0.0255546	0.0251377	0.311104	-0.044834	0.0439684	0.309648	-0.0323088	0.0359369	0.370174	141	TG	195.241	0.0022	26135	391047
categorical-20002-both_sexes-1126	Non-cancer illness code, self-reported	0.110774	0.108992	0.311214	-0.145119	0.188942	0.443755	-0.0289262	0.161988	0.858534	141	TG	158.617	0.169	998	419475
categorical-20002-both_sexes-1491	Non-cancer illness code, self-reported	-0.269849	0.266219	0.312505	-0.442147	0.46576	0.344115	-0.558008	0.470903	0.238035	141	TG	124.987	0.8409	129	420344
phecode-364.1-both_sexes	Corneal opacity	-0.288895	0.285328	0.313046	0.025037	0.498351	0.960004	-0.161868	0.456236	0.723281	141	TG	136.229	0.6151	123	404535
phecode-216-both_sexes	Benign neoplasm of skin	-0.0378633	0.0374049	0.313163	-0.067749	0.0654095	0.302109	0.00868317	0.0531817	0.870539	141	TG	184.32	0.0106	10125	409694
phecode-870-both_sexes	Open wounds of head; neck; and trunk	-0.0316443	0.0312933	0.313658	-0.00591534	0.0547422	0.914105	-0.0362183	0.0481612	0.453301	141	TG	153.274	0.2538	12193	400468
phecode-281.11-both_sexes	Pernicious anemia	-0.130179	0.128963	0.314509	-0.0134496	0.225606	0.952547	-0.111658	0.184062	0.545077	141	TG	209.733	0.0001	943	396365
icd10-M95-both_sexes	M95 Other acquired deformities of musculoskeletal system and connective tissue	-0.172494	0.171046	0.314969	-0.507718	0.297716	0.0903583	-0.281678	0.273044	0.304028	141	TG	145.255	0.4086	365	420166
icd10-J04-both_sexes	J04 Acute laryngitis and tracheitis	0.229602	0.227809	0.315254	0.138162	0.399065	0.729704	0.563197	0.368187	0.12836	141	TG	134.35	0.6612	190	420341
phecode-721-both_sexes	Spondylosis and allied disorders	-0.0385611	0.0383163	0.315965	-0.0486345	0.0670545	0.469488	-0.0673132	0.0546442	0.220072	141	TG	190.716	0.004	10244	401917
phecode-174-both_sexes	Breast cancer	0.0351619	0.0349398	0.31598	-0.0138988	0.0609295	0.819894	0.0105375	0.046641	0.821588	141	TG	199.531	0.0008	13491	398795
icd10-H17-both_sexes	H17 Corneal scars and opacities	-0.286874	0.285224	0.316255	0.0280428	0.498152	0.955189	-0.136189	0.485459	0.77948	141	TG	136.204	0.6161	123	420408
phecode-282-both_sexes	Hereditary hemolytic anemias	-0.19859	0.197463	0.31629	0.142001	0.343737	0.680164	-0.214214	0.345006	0.535676	141	TG	116.311	0.9476	207	396365
icd10-Y65-both_sexes	Y65 Other misadventures during surgical and medical care	-0.344162	0.342433	0.316606	0.539796	0.592386	0.363755	-0.853325	0.56453	0.132898	141	TG	164.572	0.0985	102	420429
categorical-20002-both_sexes-1561	Non-cancer illness code, self-reported	-0.15865	0.157883	0.3167	0.231048	0.273117	0.399024	0.151425	0.266371	0.570624	141	TG	148.352	0.3479	437	420036
phecode-280.2-both_sexes	Iron deficiency anemia secondary to blood loss (chronic)	0.141026	0.140419	0.316955	0.187933	0.245723	0.445679	0.170441	0.236285	0.471906	141	TG	146.818	0.3794	550	396365
icd10-H66-both_sexes	H66 Suppurative and unspecified otitis media	-0.114296	0.113833	0.317078	-0.297777	0.198475	0.135798	-0.137847	0.186907	0.462041	141	TG	153.948	0.2435	881	419650
icd10-N30-both_sexes	N30 Cystitis	0.0560278	0.0559128	0.318045	-0.133793	0.0959204	0.165292	-0.0351378	0.0915693	0.701761	141	TG	146.681	0.3814	3473	417058
phecode-340-both_sexes	Migraine	-0.0585188	0.0584302	0.318306	-0.0678686	0.102262	0.507997	0.0104088	0.0923017	0.910375	141	TG	169.154	0.0659	3710	407934
categorical-20002-both_sexes-1430	Non-cancer illness code, self-reported	0.245553	0.245726	0.319375	-0.157094	0.428324	0.714353	0.176153	0.410467	0.668472	141	TG	124.266	0.8512	147	420326
icd10-Z54-both_sexes	Z54 Convalescence	-0.203468	0.203622	0.3194	0.217698	0.354916	0.540628	0.00519025	0.35942	0.988499	141	TG	126.008	0.8263	224	420307
phecode-277.4-both_sexes	Disorders of bilirubin excretion	0.148154	0.148694	0.320791	0.338926	0.259493	0.193674	0.293299	0.23303	0.210258	141	TG	142.228	0.4745	471	418882
icd10-W21-both_sexes	W21 Striking against or struck by sports equipment	0.209246	0.210065	0.320921	0.0264602	0.367168	0.942653	0.356917	0.326833	0.276688	141	TG	157.706	0.1816	260	420271
phecode-394.7-both_sexes	Disease of tricuspid valve	0.124463	0.124955	0.320935	-0.208321	0.215955	0.336394	0.0776603	0.21647	0.720317	141	TG	131.861	0.7119	624	400902
phecode-465.4-both_sexes	Acute laryngitis and tracheitis	0.225088	0.226297	0.321619	0.211543	0.396582	0.594599	0.175375	0.366777	0.633288	141	TG	137.277	0.5907	197	417499
icd10-M79-both_sexes	M79 Other soft tissue disorders, not elsewhere classified	-0.0541018	0.0544192	0.322063	-0.0382193	0.0933594	0.682968	-0.0216903	0.0806134	0.788322	126	TG	134.143	0.3221	4058	416473
phecode-722.1-both_sexes	Displacement of intervertebral disc	-0.133778	0.134947	0.323232	0.0166296	0.236172	0.943966	0.0189195	0.215209	0.930072	141	TG	148.222	0.35	608	401917
phecode-720-both_sexes	Spinal stenosis	0.0542135	0.0548309	0.324496	0.162714	0.0952591	0.0898468	0.110707	0.0755305	0.144964	141	TG	201.237	0.0006	5134	401917
phecode-275.3-both_sexes	Disorders of magnesium metabolism	0.118812	0.120168	0.324508	0.0273697	0.210205	0.896592	-0.0149311	0.200857	0.940848	141	TG	134.285	0.6602	688	417428
icd10-T20-both_sexes	T20 Burn and corrosion of head and neck	-0.325773	0.329696	0.324807	-0.454336	0.577323	0.432639	-0.0161255	0.493807	0.973996	141	TG	189.074	0.0055	128	420403
icd10-N48-both_sexes	N48 Other disorders of penis	0.071577	0.0725515	0.325556	-0.0842782	0.125985	0.504634	-0.0591064	0.101384	0.560835	141	TG	172.723	0.0428	2448	418083
categorical-20001-both_sexes-1035	Cancer code, self-reported	-0.0935936	0.0948842	0.325639	-0.320874	0.164334	0.0528799	-0.17464	0.159527	0.275511	141	TG	120.563	0.9047	996	419477
categorical-20002-both_sexes-1385	Non-cancer illness code, self-reported	0.0791757	0.0803531	0.326154	0.367177	0.137374	0.00842143	0.252303	0.115853	0.0310978	141	TG	163.176	0.1124	1875	418598
phecode-497-both_sexes	Bronchitis	0.120686	0.122585	0.326563	-0.287036	0.210445	0.17479	-0.237232	0.192251	0.219282	141	TG	163.247	0.1096	797	379656
categorical-20002-both_sexes-1066	Non-cancer illness code, self-reported	0.07706	0.0782773	0.326593	0.127578	0.136832	0.352762	0.0368049	0.134225	0.784332	141	TG	112.079	0.9716	1353	419120
phecode-252.2-both_sexes	Hypoparathyroidism	-0.252982	0.257191	0.326991	-0.101775	0.4498	0.821326	-0.234149	0.370923	0.528901	141	TG	182.27	0.0136	202	415877
phecode-961-both_sexes	Poisoning by other anti-infectives	-0.155604	0.158732	0.328631	0.291211	0.273825	0.289402	0.103147	0.218468	0.637561	141	TG	178.631	0.0206	521	383239
phecode-480.12-both_sexes	Pseudomonal pneumonia	0.277064	0.283169	0.329544	0.4972	0.495487	0.317384	0.196353	0.472519	0.67838	141	TG	135.017	0.6421	124	405999
categorical-22137-both_sexes-22137	Doctor diagnosed tuberculosis	0.144574	0.147845	0.329823	0.620772	0.253861	0.015723	0.17428	0.221815	0.43337	141	TG	164.379	0.0999	562	105679
phecode-747.2-both_sexes	Congenital anomalies of peripheral vascular system	-0.197164	0.20201	0.330743	-0.526438	0.351956	0.136986	-0.287232	0.300503	0.340803	141	TG	149.69	0.3219	271	416857
categorical-20002-both_sexes-1413	Non-cancer illness code, self-reported	0.0787365	0.0807563	0.331248	5.24611e-05	0.141071	0.999704	0.177687	0.12732	0.165044	141	TG	140.692	0.5119	1606	418867
icd10-O99-both_sexes	O99 Other maternal diseases classifiable elsewhere but complicating pregnancy, childbirth and the puerperium	-0.0686728	0.07048	0.331559	0.140213	0.121454	0.250294	-0.112574	0.124257	0.366503	141	TG	113.535	0.9641	1737	418794
phecode-625.1-females	Dyspareunia	0.0842904	0.0865248	0.331649	0.00941337	0.151287	0.950475	-0.0793916	0.14608	0.587664	141	TG	127.24	0.8045	1257	216940
phecode-175-females	Acquired absence of breast	0.0613505	0.0629902	0.331752	0.144207	0.109894	0.191606	0.0163642	0.0891832	0.85468	141	TG	158.884	0.1658	3058	204849
icd10-H44-both_sexes	H44 Disorders of globe	0.145427	0.149524	0.332431	0.124241	0.261473	0.63542	-0.0619139	0.215202	0.774	141	TG	157.809	0.1801	522	420009
icd10-W18-both_sexes	W18 Other fall on same level	-0.0602616	0.0619666	0.332487	-0.088281	0.108451	0.417025	-0.048829	0.111928	0.663324	141	TG	131.446	0.722	2511	418020
icd10-R74-both_sexes	R74 Abnormal serum enzyme levels	-0.164337	0.169157	0.332971	0.0455549	0.29534	0.87764	0.023172	0.291931	0.936848	141	TG	123.747	0.8609	317	420214
categorical-20002-both_sexes-1251	Non-cancer illness code, self-reported	-0.154886	0.15993	0.334486	-0.0952471	0.279844	0.734101	0.0557992	0.261542	0.831366	141	TG	144.143	0.434	415	420058
phecode-360-both_sexes	Disorders of the globe	0.145408	0.150377	0.335231	0.103822	0.262969	0.693592	0.0232571	0.216025	0.91442	141	TG	159.978	0.1509	523	404535
icd10-R60-both_sexes	R60 Oedema, not elsewhere classified	-0.0666469	0.0690399	0.33604	-0.0440956	0.120813	0.715673	-0.0383301	0.105646	0.717288	141	TG	156.388	0.2007	2452	418079
phecode-509.5-both_sexes	Respiratory arrest	-0.25847	0.268379	0.337167	0.560125	0.462116	0.227535	-0.466933	0.409756	0.256425	141	TG	157.029	0.19	160	404684
phecode-256-females	Ovarian dysfunction	0.164409	0.170711	0.337168	0.333054	0.298395	0.266284	0.388624	0.288892	0.180728	141	TG	136.689	0.6049	344	224884
phecode-420.3-both_sexes	Endocarditis	0.105812	0.109869	0.337172	0.212752	0.191997	0.269733	0.215058	0.173758	0.217906	141	TG	149.16	0.3322	909	416313
phecode-782.3-both_sexes	Edema	-0.0663578	0.0689507	0.337511	-0.0506731	0.120671	0.675186	-0.069455	0.104347	0.506752	141	TG	156.646	0.1965	2461	417712
phecode-531.1-both_sexes	Hemorrhage from gastrointestinal ulcer	0.119824	0.124529	0.3376	0.0689195	0.218146	0.752527	0.229321	0.201502	0.257039	141	TG	164.747	0.0968	788	411516
phecode-701.2-both_sexes	Scar conditions and fibrosis of skin	-0.0634309	0.0659402	0.337735	-0.0235163	0.115347	0.838751	-0.0796418	0.1006	0.429896	141	TG	160.486	0.1446	2741	413923
categorical-20002-both_sexes-1644	Non-cancer illness code, self-reported	-0.151109	0.157152	0.337934	0.162503	0.272931	0.552544	-0.0808829	0.253056	0.74973	141	TG	132.044	0.7091	393	420080
phecode-070-both_sexes	Viral hepatitis	-0.130048	0.135358	0.338323	-0.104802	0.237073	0.659129	-0.205984	0.189485	0.278873	141	TG	178.413	0.0214	715	413496
phecode-261.2-both_sexes	Vitamin B-complex deficiencies	-0.115285	0.120178	0.339072	0.0365154	0.209864	0.862122	0.0332571	0.165169	0.840716	141	TG	218.056	0.0001	1119	416692
phecode-614.4-females	Inflammatory diseases of uterus, except cervix	-0.199319	0.208938	0.341749	-0.457403	0.364675	0.211847	-0.282486	0.306862	0.358862	141	TG	181.375	0.0145	306	217500
phecode-217-both_sexes	Vascular hamartomas and non-neoplastic nevi	0.119602	0.125962	0.343999	-0.236426	0.217593	0.279117	0.00042738	0.18311	0.998141	141	TG	160.253	0.1474	751	409694
phecode-611-both_sexes	Abnormal findings on mammogram or breast exam	-0.073538	0.0775732	0.344772	-0.0432327	0.135722	0.750554	-0.0761551	0.123427	0.538233	141	TG	137.255	0.5907	1702	412667
icd10-X41-both_sexes	X41 Accidental poisoning by and exposure to antiepileptic, sedative-hypnotic, anti-Parkinsonism and psychotropic drugs, not elsewhere classified	0.197745	0.208632	0.344855	-0.353569	0.36118	0.329316	0.149835	0.300017	0.618268	141	TG	175.42	0.0315	297	420234
phecode-145.3-both_sexes	Cancer of major salivary glands	-0.325605	0.343813	0.34525	0.110301	0.600129	0.854441	-0.401351	0.465362	0.389916	141	TG	204.167	0.0003	127	418011
icd10-S06-both_sexes	S06 Intracranial injury	0.157827	0.166788	0.34564	-0.220318	0.28966	0.44818	0.20717	0.265933	0.437276	141	TG	140.525	0.516	372	420159
categorical-20002-both_sexes-1470	Non-cancer illness code, self-reported	0.164802	0.174163	0.345651	-0.253752	0.301495	0.401433	0.149203	0.30109	0.620994	141	TG	134.184	0.6643	325	420148
phecode-1004-both_sexes	Other signs and symptoms involving emotional state	0.123832	0.131019	0.346216	0.0219208	0.229076	0.923903	-0.00924411	0.228331	0.967764	141	TG	132.938	0.6909	568	419963
phecode-189.11-both_sexes	Malignant neoplasm of kidney, except pelvis	-0.0823365	0.0872767	0.347104	-0.472681	0.14731	0.00165535	-0.291361	0.140873	0.0404571	141	TG	133.934	0.6693	1307	415431
phecode-289.4-both_sexes	Lymphadenitis	0.0529376	0.0561278	0.347223	0.000854479	0.0981013	0.993063	-0.0495498	0.0924264	0.59274	141	TG	137.704	0.5807	3285	410877
phecode-573.9-both_sexes	Abnormal serum enzyme levels	-0.158581	0.168146	0.347247	0.00668663	0.293889	0.981881	0.0310023	0.295125	0.916488	141	TG	122.716	0.8753	318	408402
phecode-358.1-both_sexes	Myasthenia gravis	0.194645	0.206894	0.348431	-0.290982	0.358699	0.41863	0.287316	0.349604	0.412569	141	TG	130.972	0.7302	224	417332
phecode-757-both_sexes	Congenital anomalies of the integument	-0.195249	0.207711	0.348835	-0.362463	0.363369	0.320253	-0.0658761	0.365843	0.857361	141	TG	122.236	0.8836	208	419140
icd10-C49-both_sexes	C49 Malignant neoplasm of other connective and soft tissue	0.133954	0.142812	0.349875	0.128506	0.249927	0.607947	0.203329	0.26183	0.438723	141	TG	103.871	0.994	374	420157
icd10-H92-both_sexes	H92 Otalgia and effusion of ear	0.111178	0.118588	0.35011	0.565196	0.202256	0.00593348	0.223157	0.207023	0.282916	141	TG	115.107	0.9557	603	419928
categorical-20002-both_sexes-1573	Non-cancer illness code, self-reported	0.151221	0.161307	0.35013	0.344591	0.281329	0.222696	0.31836	0.261582	0.225629	141	TG	128.156	0.7881	361	420112
phecode-801-both_sexes	Fracture of ankle and foot	0.0633356	0.067583	0.350294	-0.0213118	0.118067	0.857018	0.195982	0.105051	0.0641905	141	TG	157.341	0.1853	2559	395047
phecode-766-both_sexes	Neuralgia, neuritis, and radiculitis NOS	-0.0745545	0.0796224	0.350705	0.0655578	0.138558	0.636852	-0.119825	0.134069	0.372985	141	TG	136.918	0.5985	1586	415549
phecode-747.12-both_sexes	Valvular heart disease/ heart chambers	-0.150292	0.160691	0.351253	-0.387478	0.280101	0.168775	0.061494	0.286279	0.830232	141	TG	113.705	0.9627	322	416857
phecode-694-both_sexes	Dyschromia and Vitiligo	-0.086506	0.0925909	0.351767	0.369318	0.155028	0.0185603	0.0771566	0.149587	0.606808	141	TG	140.776	0.5084	1214	412638
icd10-A49-both_sexes	A49 Bacterial infection of unspecified site	0.0922069	0.0988248	0.352409	0.342105	0.171105	0.0475153	0.160532	0.160242	0.318164	141	TG	126.884	0.8105	966	419565
categorical-22129-both_sexes-22129	Doctor diagnosed chronic bronchitis	0.108125	0.115906	0.352496	0.276237	0.201922	0.173509	0.170463	0.146212	0.245653	141	TG	216.959	0.0001	1211	105030
categorical-20002-both_sexes-1463	Non-cancer illness code, self-reported	-0.0837062	0.0897501	0.352601	-0.106844	0.157087	0.497539	-0.0296929	0.113415	0.793855	141	TG	236.429	0.0001	2211	418262
phecode-149-both_sexes	Cancer of larynx, pharynx, nasal cavities	-0.103533	0.111054	0.352796	-0.150191	0.19453	0.441385	-0.191263	0.181934	0.294942	141	TG	129.566	0.7602	775	418011
categorical-20001-both_sexes-1050	Cancer code, self-reported	-0.237936	0.255444	0.353219	-0.531363	0.445924	0.235448	-0.30669	0.430993	0.477903	141	TG	135.028	0.6418	152	420321
phecode-709.7-both_sexes	Unspecified diffuse connective tissue disease	-0.259758	0.279356	0.354053	0.402462	0.483927	0.407029	0.386852	0.364977	0.290999	141	TG	223.219	0.0001	210	411677
categorical-20002-both_sexes-1438	Non-cancer illness code, self-reported	-0.247747	0.26655	0.354253	-0.37341	0.46659	0.424906	-0.757957	0.422339	0.0748646	141	TG	159.123	0.163	163	420310
categorical-20002-both_sexes-1250	Non-cancer illness code, self-reported	0.151343	0.162948	0.354602	0.0666576	0.285037	0.815441	-0.111615	0.25531	0.662659	141	TG	146.082	0.3917	405	420068
icd10-T21-both_sexes	T21 Burn and corrosion of trunk	0.278805	0.30032	0.354818	0.428354	0.525103	0.416038	0.207239	0.450815	0.646446	141	TG	159.705	0.1554	130	420401
phecode-317.1-both_sexes	Alcoholism	-0.0321301	0.0346179	0.354936	-0.0847997	0.0603829	0.162441	-4.88922e-05	0.0541524	0.999281	141	TG	173.162	0.0414	11353	392046
icd10-C15-both_sexes	C15 Malignant neoplasm of oesophagus	-0.101106	0.108997	0.35521	0.117784	0.189454	0.535157	-0.0160788	0.167207	0.92353	141	TG	155.61	0.2131	975	419556
icd10-E66-both_sexes	E66 Obesity	-0.0377444	0.0407649	0.356089	-0.0113466	0.0712757	0.873748	-0.0419982	0.0488505	0.391409	141	TG	321.833	0.0001	15917	404614
phecode-300.12-both_sexes	Agorophobia, social phobia, and panic disorder	0.103575	0.112093	0.357067	0.14746	0.196082	0.453304	0.0322954	0.169807	0.849437	141	TG	178.181	0.0219	1046	369930
phecode-601.1-males	Prostatitis	0.0712517	0.0771631	0.357392	-0.129704	0.133431	0.332705	-0.152792	0.121883	0.212079	141	TG	151.447	0.2893	1900	169762
phecode-614-females	Inflammatory diseases of female pelvic organs	0.0396857	0.0430082	0.357726	-0.0404728	0.0748328	0.589481	-0.0199138	0.0667229	0.765798	141	TG	165.643	0.0896	6796	217500
phecode-459.1-both_sexes	Hemorrhage NOS	-0.266908	0.289344	0.357876	-0.399883	0.506641	0.431291	-0.198423	0.469609	0.673288	141	TG	143.457	0.4488	126	392807
categorical-20002-both_sexes-1282	Non-cancer illness code, self-reported	0.215118	0.233206	0.357887	-0.178689	0.406238	0.660719	-0.081278	0.358662	0.821054	141	TG	140.765	0.5096	191	420282
icd10-N32-both_sexes	N32 Other disorders of bladder	-0.0343951	0.0373428	0.358601	-0.178279	0.0636399	0.00581464	-0.0681382	0.0522382	0.194246	141	TG	185.316	0.0101	10365	410166
icd10-M06-both_sexes	M06 Other rheumatoid arthritis	0.0775008	0.0842858	0.359415	0.205046	0.146894	0.164977	0.204665	0.091291	0.0265412	141	TG	309.175	0.0001	3324	417207
phecode-278.1-both_sexes	Obesity	-0.0376312	0.0409286	0.35945	-0.0109963	0.0715613	0.878099	-0.0420878	0.0467007	0.369017	141	TG	323.375	0.0001	15917	404444
phecode-290.2-both_sexes	Delirium due to conditions classified elsewhere	0.10439	0.113951	0.361193	0.189782	0.199371	0.3428	0.0870074	0.14152	0.539681	141	TG	237.398	0.0001	1362	410833
categorical-20002-both_sexes-1414	Non-cancer illness code, self-reported	-0.174639	0.190887	0.361825	0.218814	0.331575	0.510394	0.0873762	0.278037	0.75379	141	TG	186.574	0.0093	377	420096
phecode-755.1-both_sexes	Congenital deformities of feet	0.172339	0.188583	0.362358	0.448674	0.328803	0.174594	0.212838	0.325186	0.513857	141	TG	129.145	0.7681	267	419170
icd10-R30-both_sexes	R30 Pain associated with micturition	0.0937214	0.102565	0.362404	-0.245354	0.176131	0.165837	-0.177209	0.138139	0.201672	141	TG	194.379	0.0026	1376	419155
phecode-300.9-both_sexes	Posttraumatic stress disorder	0.22698	0.249018	0.363598	-0.567567	0.428034	0.187019	0.0525439	0.384653	0.891543	141	TG	158.375	0.1713	187	369930
phecode-528.4-both_sexes	Cysts of oral soft tissues	-0.233582	0.256267	0.363609	-0.293729	0.448658	0.513754	-0.168211	0.416881	0.687198	141	TG	128.091	0.7893	144	413830
icd10-Y85-both_sexes	Y85 Sequelae of transport accidents	0.135093	0.148347	0.364042	0.0468352	0.259517	0.857046	0.0298138	0.235545	0.899459	141	TG	143.325	0.4519	481	420050
phecode-588-both_sexes	Disorders resulting from impaired renal function	-0.271076	0.297994	0.364561	0.0557887	0.52053	0.914803	-0.361632	0.493967	0.465333	141	TG	147.052	0.3736	120	401927
icd10-Q87-both_sexes	Q87 Other specified congenital malformation syndromes affecting multiple systems	0.245412	0.27059	0.365991	0.257352	0.473135	0.587361	0.388347	0.428469	0.366302	141	TG	149.111	0.3335	149	420382
icd10-D33-both_sexes	D33 Benign neoplasm of brain and other parts of central nervous system	0.14361	0.158369	0.366066	0.342602	0.276373	0.217198	0.213082	0.265093	0.422875	141	TG	140.761	0.5099	412	420119
phecode-388-both_sexes	Other disorders of ear	0.232277	0.256317	0.366381	0.757543	0.446705	0.0921537	-0.0256596	0.405426	0.949625	141	TG	156.748	0.1952	176	414345
categorical-20002-both_sexes-1660	Non-cancer illness code, self-reported	0.136246	0.150418	0.366606	0.110554	0.263111	0.675004	-0.0132231	0.207635	0.949312	141	TG	206.39	0.0001	671	419802
icd10-R29-both_sexes	R29 Other symptoms and signs involving the nervous and musculoskeletal systems	0.047549	0.0525034	0.366684	0.0552939	0.0918604	0.548199	0.0185925	0.0786842	0.813551	141	TG	181.968	0.0142	4972	415559
icd10-Q66-both_sexes	Q66 Congenital deformities of feet	0.172552	0.190761	0.36726	0.426711	0.332755	0.201852	0.329448	0.32079	0.306196	141	TG	128.424	0.7821	259	420272
phecode-644-females	Anemia during pregnancy	-0.095291	0.105385	0.367433	0.0517499	0.183887	0.778805	-0.166673	0.174102	0.340052	141	TG	129.424	0.7634	877	226624
categorical-20002-both_sexes-1331	Non-cancer illness code, self-reported	0.0985488	0.109144	0.368117	0.260395	0.190509	0.173883	0.203352	0.147642	0.170606	141	TG	203.354	0.0003	1277	419196
icd10-V89-both_sexes	V89 Motor- or nonmotor-vehicle accident, type of vehicle unspecified	0.205871	0.228629	0.369423	0.289586	0.40035	0.470692	0.528932	0.39628	0.184127	141	TG	135.795	0.6252	190	420341
phecode-368.1-both_sexes	Amblyopia	0.09862	0.109538	0.369491	0.178043	0.191597	0.354366	0.236622	0.182667	0.197324	141	TG	124.588	0.8465	774	416168
categorical-20002-both_sexes-1629	Non-cancer illness code, self-reported	-0.208514	0.231683	0.369668	-0.186211	0.405547	0.646836	-0.311256	0.3833	0.418146	141	TG	120.308	0.9084	163	420310
icd10-R01-both_sexes	R01 Cardiac murmurs and other cardiac sounds	-0.0814551	0.0905437	0.369866	-0.0169656	0.158265	0.914787	-0.0123139	0.147032	0.933375	141	TG	160.828	0.1404	1447	419084
phecode-368.9-both_sexes	Subjective visual disturbances	-0.106156	0.118111	0.370309	-0.0540366	0.206707	0.794158	-0.210163	0.187028	0.263064	141	TG	156.585	0.1973	833	416168
icd10-O68-both_sexes	O68 Labour and delivery complicated by foetal stress [distress]	-0.050471	0.0562224	0.370885	0.00976936	0.0981849	0.920885	-0.0587959	0.0873081	0.501784	141	TG	130.333	0.7438	3322	417209
phecode-289.8-both_sexes	Polycythemia, secondary	0.155027	0.172722	0.370965	-0.149537	0.30057	0.619616	0.353698	0.280449	0.209339	141	TG	156.293	0.2025	384	410191
phecode-750.14-both_sexes	Congenital anomalies of esophagus	-0.256235	0.285655	0.371255	-1.01429	0.493744	0.041823	-0.451887	0.508725	0.375917	141	TG	114.366	0.9588	103	417905
icd10-U83-both_sexes	U83 Resistance to other antibiotics	0.199062	0.222231	0.371927	0.4045	0.388215	0.299244	0.399551	0.341384	0.243834	141	TG	132.495	0.7002	197	420334
icd10-X61-both_sexes	X61 Intentional self-poisoning by and exposure to antiepileptic, sedative-hypnotic, anti-Parkinsonism and psychotropic drugs, not elsewhere classified	-0.0735669	0.0821646	0.372131	-0.155472	0.143663	0.28104	-0.176645	0.140555	0.21093	141	TG	141.371	0.4943	1559	418972
phecode-429.3-both_sexes	Symptoms involving cardiovascular system	0.16053	0.179642	0.373065	-0.145589	0.313457	0.643044	0.141024	0.281863	0.617631	141	TG	157.376	0.1856	361	412106
phecode-614.54-females	Abscess or ulceration of vulva	-0.185999	0.208384	0.373616	0.232282	0.362568	0.522799	-0.0248188	0.293301	0.932685	141	TG	176.029	0.0288	301	217500
phecode-732.1-both_sexes	Juvenile osteochondrosis	-0.159976	0.17924	0.373644	0.2481	0.310858	0.426166	0.188183	0.294143	0.523369	141	TG	117.589	0.9353	269	397835
phecode-250.22-both_sexes	Type 2 diabetes with renal manifestations	-0.178103	0.199558	0.373663	-0.41335	0.348553	0.237684	-0.227989	0.331204	0.492361	141	TG	142.008	0.4809	261	396181
icd10-W07-both_sexes	W07 Fall involving chair	-0.134032	0.150526	0.374766	0.0811305	0.262533	0.757762	-0.127005	0.25621	0.62088	141	TG	142.54	0.4704	465	420066
phecode-292.6-both_sexes	Hallucinations	-0.142593	0.160144	0.374776	-0.278172	0.280129	0.322428	0.179175	0.258549	0.489457	141	TG	157.696	0.182	451	410833
phecode-598.9-both_sexes	Other nonspecific findings on examination of urine	0.150209	0.168731	0.374869	0.250325	0.294992	0.397571	0.155035	0.268952	0.565243	141	TG	162.369	0.1198	420	416375
icd10-A04-both_sexes	A04 Other bacterial intestinal infections	0.0533182	0.0598992	0.374922	-0.151685	0.102766	0.1422	-0.127307	0.0976511	0.194478	141	TG	148.733	0.3406	3088	417443
phecode-286-both_sexes	Coagulation defects	0.0863824	0.0971784	0.375579	0.0201679	0.169833	0.905644	0.0492568	0.148319	0.740311	141	TG	158.037	0.1767	1260	416975
icd10-K04-both_sexes	K04 Diseases of pulp and periapical tissues	-0.0533281	0.0601888	0.377129	-0.0883877	0.105247	0.402457	0.0130869	0.0972076	0.893099	141	TG	127.875	0.7941	2615	417916
icd10-R82-both_sexes	R82 Other abnormal findings in urine	0.149301	0.16854	0.37722	0.252029	0.294641	0.393816	0.16734	0.258518	0.518495	141	TG	162.032	0.1244	420	420111
icd10-S81-both_sexes	S81 Open wound of lower leg	-0.0995299	0.112433	0.377545	0.136208	0.195304	0.486707	0.0404269	0.186219	0.828452	141	TG	129.584	0.7601	755	419776
phecode-702-both_sexes	Degenerative skin conditions and other dermatoses	0.0361926	0.0410545	0.379518	-0.00636398	0.0717331	0.929434	0.00764214	0.0649219	0.906464	141	TG	154.915	0.2259	6937	408038
phecode-333.1-both_sexes	Essential tremor	-0.14564	0.165473	0.38029	0.204874	0.287496	0.477278	-0.213309	0.275559	0.440181	141	TG	128.825	0.7752	342	403249
categorical-20002-both_sexes-1602	Non-cancer illness code, self-reported	-0.215441	0.244921	0.380564	-0.426376	0.42779	0.320645	-0.808757	0.405197	0.0478785	141	TG	136.671	0.6052	167	420306
phecode-295.3-both_sexes	Psychosis	-0.213238	0.24272	0.381159	-0.17199	0.425116	0.686413	0.171816	0.349425	0.623693	141	TG	178.355	0.021	223	369930
categorical-20001-both_sexes-1032	Cancer code, self-reported	0.192358	0.219812	0.383016	0.147524	0.384754	0.701992	0.176332	0.37596	0.639787	141	TG	126.392	0.8185	193	420280
icd10-F52-both_sexes	F52 Sexual dysfunction, not caused by organic disorder or disease	0.155098	0.177257	0.383078	-0.512121	0.302526	0.09273	-0.134435	0.280611	0.632629	141	TG	145.428	0.4068	340	420191
categorical-20122-both_sexes-20122	Bipolar disorder status	0.168895	0.193043	0.383123	-0.111627	0.336318	0.740457	0.18472	0.304232	0.544722	141	TG	146.34	0.3877	567	641
categorical-20002-both_sexes-1635	Non-cancer illness code, self-reported	-0.221123	0.252798	0.383235	-0.152604	0.441984	0.730413	-0.0498759	0.38615	0.897415	141	TG	162.83	0.1153	187	420286
phecode-643.1-females	Hyperemesis gravidarum	0.238654	0.273569	0.384499	0.592879	0.478062	0.217001	0.614882	0.395814	0.12257	141	TG	161.675	0.1292	160	227261
phecode-386.9-both_sexes	Dizziness and giddiness (Light-headedness and vertigo)	0.0369079	0.0423271	0.384719	0.00635407	0.0740443	0.931737	0.0800205	0.0657269	0.225474	141	TG	138.405	0.5655	5902	412745
phecode-444-both_sexes	Arterial embolism and thrombosis	0.107125	0.123068	0.385543	0.438442	0.212793	0.0412235	0.333957	0.152563	0.0302562	141	TG	225.306	0.0001	1126	408565
icd10-J31-both_sexes	J31 Chronic rhinitis, nasopharyngitis and pharyngitis	-0.0895465	0.103002	0.386135	-0.31856	0.178766	0.0769338	-0.153049	0.154756	0.324384	141	TG	146.437	0.3856	1025	419506
icd10-Z03-both_sexes	Z03 Medical observation and evaluation for suspected diseases and conditions	-0.0297485	0.0342375	0.386397	0.0591853	0.0592581	0.319641	-0.000352546	0.0501872	0.994405	141	TG	192.921	0.0032	12784	407747
phecode-385.5-both_sexes	Tympanosclerosis and middle ear disease related to otitis media	0.165141	0.190132	0.386573	0.245439	0.333063	0.462416	0.179519	0.318158	0.573491	141	TG	122.637	0.878	249	416007
phecode-038.1-both_sexes	Gram negative septicemia	-0.0815056	0.0939763	0.387262	-0.0261041	0.164388	0.87406	-0.017667	0.153323	0.90843	141	TG	151.141	0.2963	1263	401597
phecode-172.3-both_sexes	Carcinoma in situ of skin	-0.0990468	0.114231	0.387384	-0.0964472	0.19993	0.630278	-0.198425	0.168063	0.23974	141	TG	166.216	0.085	942	402691
icd10-X60-both_sexes	X60 Intentional self-poisoning by and exposure to nonopioid analgesics, antipyretics and antirheumatics	0.0688219	0.0793735	0.38739	-0.0734998	0.138244	0.595805	0.0921169	0.136483	0.500833	141	TG	130.99	0.731	1566	418965
phecode-741.5-both_sexes	Hemarthrosis	0.21602	0.249643	0.388346	0.246239	0.436915	0.573944	0.302588	0.454463	0.506625	141	TG	116.407	0.946	137	413456
categorical-20002-both_sexes-1668	Non-cancer illness code, self-reported	0.210665	0.24349	0.388416	0.0672155	0.425705	0.874771	-0.000324863	0.350799	0.999262	141	TG	180.575	0.0161	224	420249
phecode-512.8-both_sexes	Cough	0.045308	0.0524059	0.38876	-0.0822643	0.0907963	0.366487	0.0513684	0.0833944	0.538914	141	TG	136.867	0.5991	3760	404844
icd10-L28-both_sexes	L28 Lichen simplex chronicus and prurigo	-0.195167	0.225872	0.389033	0.302203	0.391958	0.442011	-0.11503	0.346428	0.740352	141	TG	179.1	0.0194	257	420274
phecode-157-both_sexes	Pancreatic cancer	-0.0903108	0.104592	0.389362	-0.527604	0.177434	0.0034716	-0.276982	0.168798	0.103061	141	TG	138.545	0.5614	936	400294
phecode-615-females	Endometriosis	0.0491018	0.0568713	0.389403	-0.00896349	0.0993429	0.928236	0.045808	0.0823931	0.57912	141	TG	182.946	0.0124	4354	217500
icd10-T39-both_sexes	T39 Poisoning by nonopioid analgesics, antipyretics and antirheumatics	0.0642259	0.0744007	0.389481	-0.0366298	0.129908	0.778389	0.172338	0.124572	0.168731	141	TG	140.141	0.5232	1910	418621
phecode-695.22-both_sexes	Pemphigus and pemphigoid	-0.271528	0.31562	0.391095	0.43671	0.547916	0.426788	-0.367074	0.52515	0.485718	141	TG	146.063	0.3932	107	412638
phecode-530.9-both_sexes	Heartburn	0.0542878	0.0631395	0.391365	-0.00211005	0.110436	0.984784	0.0539917	0.105374	0.609191	141	TG	135.09	0.642	2496	371349
phecode-701.5-both_sexes	Abnormal granulation tissue	0.124227	0.144942	0.392866	0.111664	0.253687	0.660501	0.164456	0.200508	0.413497	141	TG	200.284	0.0008	703	413923
phecode-078-both_sexes	Viral warts & HPV	-0.107824	0.126067	0.393853	0.259779	0.217494	0.234348	0.182687	0.150683	0.227406	141	TG	245.428	0.0001	1142	413496
phecode-345-both_sexes	Epilepsy, recurrent seizures, convulsions	-0.0394477	0.0461281	0.393914	0.0232263	0.0805071	0.773394	-0.0769174	0.069414	0.26972	141	TG	171.369	0.0517	6082	403249
icd10-Y57-both_sexes	Y57 Other and unspecified drugs and medicaments	-0.132208	0.154758	0.394406	-0.302795	0.270313	0.264576	-0.0342394	0.246563	0.889755	141	TG	161.783	0.1274	495	420036
icd10-D75-both_sexes	D75 Other diseases of blood and blood-forming organs	-0.106776	0.125138	0.395046	-0.493539	0.21353	0.0223637	-0.0791007	0.207013	0.702993	134	TG	154.198	0.1306	778	419753
phecode-612.2-both_sexes	Hypertrophy of breast (Gynecomastia)	0.0903941	0.106092	0.395651	0.195722	0.185513	0.293242	0.134112	0.166288	0.421318	141	TG	139.075	0.5506	912	412667
icd10-J86-both_sexes	J86 Pyothorax	0.12711	0.149235	0.395808	-0.140771	0.259779	0.588762	0.0454912	0.248233	0.854859	141	TG	126.041	0.8258	420	420111
categorical-20002-both_sexes-1135	Non-cancer illness code, self-reported	0.0933614	0.109932	0.397183	-0.108962	0.191512	0.570305	0.0432616	0.17245	0.802286	141	TG	148.241	0.3489	907	419566
phecode-008.6-both_sexes	Viral Enteritis	0.0701671	0.082742	0.397872	0.0489329	0.144915	0.736125	0.00404322	0.15512	0.979242	141	TG	103.28	0.9942	1114	407487
icd10-G80-both_sexes	G80 Infantile cerebral palsy	-0.191663	0.226177	0.398216	-0.305762	0.395888	0.441221	-0.0210766	0.397395	0.957778	141	TG	115.479	0.953	166	420365
icd10-N80-both_sexes	N80 Endometriosis	0.0473039	0.0558307	0.398288	-0.0415823	0.0972386	0.669581	-0.0127982	0.0836627	0.878639	141	TG	167.515	0.0758	4141	416390
phecode-368.3-both_sexes	Anisometropia	0.175737	0.207798	0.399157	0.387172	0.362653	0.287547	0.0547039	0.361276	0.879864	141	TG	123.37	0.8652	210	416168
icd10-Y04-both_sexes	Y04 Assault by bodily force	-0.105427	0.124758	0.399526	-0.151511	0.218614	0.489435	-0.0977188	0.175873	0.579356	141	TG	155.373	0.2169	740	419791
phecode-528.41-both_sexes	Cyst of the salivary gland	-0.24124	0.285612	0.399752	-0.0196041	0.499564	0.968753	-0.0340987	0.454861	0.940349	141	TG	122.91	0.8719	111	413830
categorical-20002-both_sexes-1651	Non-cancer illness code, self-reported	-0.0688593	0.0815697	0.400011	-0.0789955	0.142641	0.580601	0.0446969	0.127622	0.726693	141	TG	151.015	0.2995	1678	418795
icd10-M77-both_sexes	M77 Other enthesopathies	-0.098154	0.116363	0.400377	0.20475	0.201158	0.310515	-0.0265815	0.170869	0.876598	141	TG	189.305	0.0053	1033	419498
icd10-D06-both_sexes	D06 Carcinoma in situ of cervix uteri	-0.107418	0.127368	0.400461	-0.280945	0.222004	0.207812	-0.194912	0.204664	0.342562	141	TG	138.245	0.567	594	419937
phecode-513.8-both_sexes	Disorders of diaphragm	-0.18245	0.216452	0.400717	0.0956912	0.377808	0.800426	-0.16605	0.369614	0.653944	141	TG	126.337	0.8203	198	408978
categorical-20002-both_sexes-1534	Non-cancer illness code, self-reported	-0.0606808	0.0719907	0.400723	-0.113139	0.125808	0.370049	-0.103145	0.104058	0.323287	141	TG	153.995	0.2408	2211	418262
icd10-M25-both_sexes	M25 Other joint disorders, not elsewhere classified	0.0437977	0.0520232	0.401287	0.0628037	0.0910207	0.491349	0.0912954	0.094304	0.334665	141	TG	105.53	0.9915	2904	417627
phecode-636-females	Early or threatened labor; hemorrhage in early pregnancy	-0.0578475	0.0689182	0.402695	-0.0754808	0.12072	0.532829	-0.0161038	0.101226	0.873829	141	TG	161.313	0.1328	2683	219979
phecode-715-both_sexes	Other inflammatory spondylopathies	-0.0602576	0.0718352	0.402994	-0.0212263	0.125674	0.866121	0.0197088	0.110353	0.858512	141	TG	170.783	0.0549	2466	371238
icd10-Z47-both_sexes	Z47 Other orthopaedic follow-up care	-0.0430817	0.0513716	0.403194	-0.0691383	0.0888194	0.437729	-0.025146	0.0825472	0.761131	133	TG	123.272	0.7383	3803	416728
icd10-Z53-both_sexes	Z53 Persons encountering health services for specifie procedures, not carried out	-0.0181499	0.0216519	0.403314	-0.0751338	0.0374396	0.0467107	-0.0213408	0.0323503	0.510544	141	TG	174.535	0.0353	30414	390117
phecode-601.4-males	Balanoposthitis	0.142482	0.170034	0.403478	-0.312266	0.29411	0.290198	0.0863747	0.259064	0.739323	141	TG	137.062	0.5947	350	169762
categorical-22140-both_sexes-22140	Doctor diagnosed lung cancer (not mesothelioma)	-0.20316	0.242645	0.403866	-0.815508	0.419419	0.0538698	-0.470755	0.41444	0.257947	141	TG	126.325	0.82	141	106100
phecode-627-females	Menopausal and postmenopausal disorders	0.0300816	0.0359357	0.403966	-0.0157746	0.0627147	0.801776	-0.0151848	0.0490208	0.757202	141	TG	192.569	0.0032	11741	194287
phecode-531.3-both_sexes	Duodenal ulcer	0.049113	0.0586742	0.403994	-0.0460761	0.10235	0.653282	-0.0510896	0.0881955	0.563333	141	TG	159.691	0.1548	3516	411516
phecode-250.42-both_sexes	Other abnormal glucose	-0.108246	0.129369	0.404178	-0.165832	0.226632	0.465569	-0.103705	0.219242	0.636939	141	TG	112.934	0.9674	500	396181
phecode-378.5-both_sexes	Paralytic strabismus	-0.12691	0.151723	0.404323	-0.0872889	0.265581	0.742899	-0.019441	0.266445	0.941939	141	TG	110.33	0.9786	353	410363
phecode-180-females	Cervical cancer and dysplasia	0.0551933	0.0660605	0.404862	0.0288875	0.115525	0.802915	0.109903	0.101376	0.280179	141	TG	142.035	0.4791	2431	198725
categorical-20002-both_sexes-1115	Non-cancer illness code, self-reported	-0.207142	0.247986	0.404973	-0.491342	0.433705	0.259209	-0.122945	0.409116	0.764231	141	TG	115.795	0.9511	138	420335
icd10-L92-both_sexes	L92 Granulomatous disorders of skin and subcutaneous tissue	0.121813	0.146059	0.405703	0.104534	0.255643	0.683238	0.222856	0.203772	0.275985	141	TG	188.046	0.0064	650	419881
icd10-M81-both_sexes	M81 Osteoporosis without pathological fracture	-0.0534933	0.064161	0.40585	0.196261	0.109308	0.0747481	0.0911585	0.0788893	0.249844	141	TG	274.486	0.0001	5089	415442
phecode-618.5-females	Prolapse of vaginal vault after hysterectomy	0.110777	0.132922	0.40604	-0.00186504	0.232266	0.993605	0.30497	0.221309	0.170393	141	TG	136.551	0.6084	573	213696
categorical-20002-both_sexes-1509	Non-cancer illness code, self-reported	-0.236868	0.284894	0.407149	-0.0817071	0.497767	0.869854	-0.80617	0.497589	0.10745	141	TG	120.939	0.9009	109	420364
phecode-723-both_sexes	Other disorders of cervical region	-0.180707	0.217374	0.407208	-0.125154	0.381102	0.743104	-0.128855	0.398727	0.747051	141	TG	125.57	0.8325	195	401917
phecode-258-both_sexes	Iatrogenic endocrine disorders	-0.255496	0.307628	0.407652	-0.545533	0.537617	0.312	-0.464177	0.478953	0.334142	141	TG	159.574	0.1576	124	415877
icd10-N94-both_sexes	N94 Pain and other conditions associated with female genital organs and menstrual cycle	-0.0514585	0.0619977	0.407949	0.0302122	0.10813	0.780349	-0.0557911	0.083989	0.507612	141	TG	179.95	0.0179	3572	416959
phecode-512.2-both_sexes	Painful respiration	0.160493	0.193378	0.407982	0.641318	0.334884	0.0575407	0.286397	0.310237	0.357515	141	TG	135.644	0.6282	268	404844
icd10-Q60-both_sexes	Q60 Renal agenesis and other reduction defects of kidney	0.236695	0.285421	0.408356	-0.508541	0.493222	0.304304	0.0977885	0.444065	0.826027	141	TG	165.502	0.0908	149	420382
icd10-D38-both_sexes	D38 Neoplasm of uncertain or unknown behaviour of middle ear and respiratory and intrathoracic organs	-0.162156	0.195817	0.409024	0.0370498	0.342381	0.913984	-0.093221	0.364339	0.798432	141	TG	115.145	0.9547	220	420311
icd10-C25-both_sexes	C25 Malignant neoplasm of pancreas	-0.0866344	0.104677	0.409285	-0.515259	0.177805	0.00436652	-0.315878	0.162041	0.0532498	141	TG	138.296	0.5684	933	419598
icd10-W02-both_sexes	W02 Fall involving ice-skates, skis, roller-skates or skateboards	0.121954	0.147478	0.409686	0.200882	0.258035	0.437594	0.30878	0.258812	0.234862	141	TG	117.194	0.9398	397	420134
phecode-500-both_sexes	Lung disease due to external agents	0.108688	0.131756	0.410822	0.171126	0.230566	0.459217	0.116551	0.208896	0.577776	141	TG	132.454	0.7002	570	404684
icd10-I98-both_sexes	I98 Other disorders of circulatory system in diseases classified elsewhere	-0.170036	0.206149	0.410876	0.167838	0.35968	0.641494	0.035586	0.286559	0.901348	141	TG	192.432	0.0031	333	420198
icd10-O20-both_sexes	O20 Haemorrhage in early pregnancy	0.0859346	0.104361	0.411662	0.0197365	0.182646	0.914105	0.0031572	0.17363	0.985518	141	TG	132.867	0.6945	913	419618
icd10-G61-both_sexes	G61 Inflammatory polyneuropathy	-0.121546	0.148469	0.414369	-0.560604	0.25584	0.0301009	-0.196856	0.267681	0.463319	141	TG	104.196	0.9936	346	420185
icd10-Q23-both_sexes	Q23 Congenital malformations of aortic and mitral valves	-0.141831	0.173477	0.414988	-0.421667	0.302209	0.165156	-0.162939	0.306545	0.595892	141	TG	120.586	0.9049	295	420236
categorical-20002-both_sexes-1497	Non-cancer illness code, self-reported	0.1892	0.231949	0.41606	0.573366	0.404063	0.158137	0.746682	0.389375	0.0571928	141	TG	128.225	0.7881	174	420299
icd10-H65-both_sexes	H65 Nonsuppurative otitis media	0.0829186	0.101727	0.416396	-0.0766968	0.17724	0.665883	0.0026864	0.146277	0.985374	141	TG	165.567	0.09	1191	419340
phecode-367.1-both_sexes	Myopia	0.0664884	0.0815913	0.416516	0.228785	0.141714	0.108707	0.236488	0.129823	0.070648	141	TG	157.613	0.1823	1758	416775
phecode-379-both_sexes	Other disorders of eye	-0.0390577	0.0479821	0.417024	-0.0137648	0.0839427	0.869987	0.018934	0.0722093	0.793545	141	TG	157.089	0.1896	5185	410363
phecode-712-both_sexes	Infective connective tissue disorders	0.231064	0.284003	0.417258	0.193017	0.497022	0.698353	0.104782	0.484107	0.828957	141	TG	115.114	0.9553	105	372332
phecode-737.1-both_sexes	Kyphosis (acquired)	-0.158796	0.195359	0.417689	-0.0943902	0.34184	0.782863	-0.178678	0.308475	0.563364	141	TG	145.157	0.4124	280	403527
phecode-536-both_sexes	Disorders of function of stomach	0.147445	0.181452	0.417836	0.222716	0.319723	0.487222	0.360057	0.298637	0.22998	141	TG	127.882	0.7932	299	379860
icd10-L27-both_sexes	L27 Dermatitis due to substances taken internally	-0.120737	0.148598	0.41788	-0.31805	0.259208	0.221894	-0.165513	0.218844	0.450736	141	TG	179.338	0.0192	598	419933
phecode-987-both_sexes	Toxic effect of other gases, fumes, or vapors	0.244181	0.300938	0.418513	0.875523	0.523587	0.0967419	0.551267	0.469283	0.242109	141	TG	142.62	0.4673	116	419038
icd10-E53-both_sexes	E53 Deficiency of other B group vitamins	-0.0923702	0.113923	0.418848	0.0333595	0.199069	0.867159	-0.0403116	0.163103	0.805151	141	TG	189.59	0.0047	1084	419447
icd10-D11-both_sexes	D11 Benign neoplasm of major salivary glands	-0.106786	0.131813	0.419239	0.150585	0.229155	0.512182	-0.0758018	0.210926	0.719855	141	TG	128.859	0.7742	550	419981
phecode-289.9-both_sexes	Abnormality of red blood cells	-0.260527	0.321901	0.419693	-0.234821	0.563045	0.677281	-0.989069	0.529134	0.0636808	141	TG	148.185	0.3503	105	410877
phecode-500.2-both_sexes	Pneumoconiosis	0.161258	0.19988	0.421165	0.196677	0.349834	0.574885	0.203153	0.284756	0.476768	141	TG	177.404	0.0238	328	404684
phecode-278-both_sexes	Overweight, obesity and other hyperalimentation	-0.0324058	0.0401832	0.42135	-0.00439834	0.0702526	0.950169	-0.0318031	0.0457754	0.488354	141	TG	315.708	0.0001	16087	404444
categorical-6148-both_sexes-4	Eye problems/disorders	0.0305515	0.0379141	0.42172	0.084677	0.0660996	0.202309	0.0429145	0.0531739	0.421	141	TG	213.338	0.0001	12985	122378
phecode-353-both_sexes	Nerve root and plexus disorders	-0.0425736	0.0529331	0.422593	0.0514739	0.0921127	0.577187	-0.0256229	0.0744559	0.731261	141	TG	204.053	0.0003	5528	399339
phecode-574.2-both_sexes	Calculus of bile duct	-0.0533166	0.0663065	0.422707	-0.170985	0.115424	0.140771	-0.113934	0.102544	0.268441	141	TG	172.484	0.0453	2917	399542
phecode-580.14-both_sexes	Chronic glomerulonephritis, NOS	-0.0863135	0.107408	0.422989	-0.301041	0.186636	0.109016	-0.170677	0.170938	0.319774	141	TG	139.743	0.5332	901	401927
icd10-X99-both_sexes	X99 Assault by sharp object	-0.194579	0.242299	0.423316	-0.433447	0.425533	0.310176	0.105472	0.424447	0.80412	140	TG	112.946	0.9604	140	420391
phecode-200.1-both_sexes	Polycythemia vera	-0.139294	0.173582	0.423645	-0.133279	0.30386	0.661618	0.0357099	0.252161	0.887587	141	TG	185.034	0.01	448	410687
icd10-D21-both_sexes	D21 Other benign neoplasms of connective and other soft tissue	-0.105381	0.1317	0.424975	-0.113778	0.23045	0.622283	-0.0467534	0.210245	0.824346	141	TG	142.527	0.4688	605	419926
icd10-O72-both_sexes	O72 Postpartum haemorrhage	-0.04311	0.0539295	0.425426	0.0113197	0.0942353	0.90456	0.018457	0.0806746	0.819371	141	TG	162.781	0.1154	1321	419210
phecode-654.2-females	Rhesus isoimmunization in pregnancy	0.147845	0.185295	0.426285	0.499953	0.322881	0.123797	0.15764	0.321925	0.625127	141	TG	139.769	0.5356	299	223346
categorical-20002-both_sexes-1477	Non-cancer illness code, self-reported	0.122078	0.153063	0.42647	0.210028	0.267926	0.434431	0.120625	0.183419	0.511845	141	TG	257.814	0.0001	811	419662
phecode-647.1-females	Infections of genitourinary tract during pregnancy	0.155606	0.195112	0.4265	0.15235	0.341412	0.656121	0.0455208	0.314858	0.885254	141	TG	146.579	0.383	285	227082
categorical-22126-both_sexes-22126	Doctor diagnosed hayfever or allergic rhinitis	0.0224978	0.0282618	0.427351	0.0771681	0.0490925	0.118249	0.0438248	0.0402076	0.277602	141	TG	189.161	0.0052	24013	82228
phecode-614.1-females	Pelvic peritoneal adhesions, female (postoperative) (postinfection)	-0.0501061	0.0629923	0.427708	-0.148605	0.109787	0.178069	-0.0326619	0.0991905	0.742433	141	TG	153.87	0.2438	2917	217500
phecode-369.2-both_sexes	Eye infection, viral	-0.203006	0.255937	0.429009	0.718453	0.437635	0.102919	-0.165614	0.430929	0.701325	141	TG	139.341	0.5434	156	409073
icd10-J94-both_sexes	J94 Other pleural conditions	0.142976	0.180803	0.430408	0.101401	0.316457	0.749127	-0.0367188	0.278453	0.895279	141	TG	172.266	0.0459	386	420145
phecode-772-both_sexes	Symptoms of the muscles	0.0955135	0.120828	0.430579	0.16797	0.211553	0.428557	0.180582	0.171744	0.294857	141	TG	171.058	0.0532	867	419537
icd10-I73-both_sexes	I73 Other peripheral vascular diseases	0.0544594	0.0689145	0.43072	0.283611	0.118318	0.0178581	0.164447	0.0790046	0.0392102	141	TG	291.824	0.0001	4778	415753
phecode-702.2-both_sexes	Seborrheic keratosis	0.0431309	0.0545871	0.430788	-0.0302458	0.0952517	0.751314	0.0101683	0.0906577	0.910856	141	TG	150.085	0.3146	3774	413594
phecode-782-both_sexes	Symptoms involving skin and other integumentary tissue	0.17952	0.227701	0.431795	0.359572	0.400764	0.371154	0.384398	0.395963	0.333326	141	TG	130.782	0.7367	146	417712
phecode-938-both_sexes	Dermatitis due to solar radiation	-0.045879	0.0582377	0.432152	-0.0241852	0.101936	0.812806	-0.0614994	0.0890085	0.490748	141	TG	150.984	0.2994	3334	412489
phecode-698-both_sexes	Pruritus and related conditions	-0.0853865	0.108414	0.432266	-0.0799425	0.189873	0.674382	-0.0866974	0.17408	0.619242	141	TG	150.222	0.3121	942	419589
categorical-20002-both_sexes-1327	Non-cancer illness code, self-reported	-0.120584	0.153288	0.432819	-0.140224	0.268294	0.60205	-0.119329	0.276144	0.666313	141	TG	111.88	0.9734	350	420123
phecode-756-both_sexes	Other congenital musculoskeletal anomalies	0.0947801	0.12059	0.433214	-0.17618	0.209167	0.401071	-0.0481009	0.18958	0.800081	141	TG	150.196	0.3133	764	419170
icd10-N03-both_sexes	N03 Chronic nephritic syndrome	-0.0837641	0.1068	0.434184	-0.296021	0.185581	0.112961	-0.117464	0.172201	0.496284	141	TG	138.042	0.5729	899	419632
phecode-530.5-both_sexes	Disorders of esophageal motility	-0.0879366	0.11233	0.435044	0.0697132	0.195908	0.722494	-0.085949	0.18059	0.634862	141	TG	135.146	0.6399	788	371349
phecode-362.4-both_sexes	Retinal vascular changes and abnomalities	-0.0840372	0.107413	0.435316	-0.108254	0.188043	0.565758	0.084449	0.151079	0.577074	141	TG	169.883	0.0611	1095	404535
icd10-S90-both_sexes	S90 Superficial injury of ankle and foot	-0.132945	0.170303	0.436335	0.388065	0.293301	0.187976	-0.114977	0.312251	0.713265	141	TG	123.501	0.8634	313	420218
phecode-446.9-both_sexes	Arteritis NOS	-0.161467	0.207194	0.437117	0.321475	0.359424	0.372646	0.367182	0.304661	0.230154	141	TG	190.717	0.0042	328	408565
icd10-Z09-both_sexes	Z09 Follow-up examination after treatment for conditions other than malignant neoplasms	0.0226953	0.029205	0.438408	0.00367501	0.0510922	0.942762	0.0426654	0.0452536	0.347404	141	TG	139.858	0.5296	12678	407853
icd10-M31-both_sexes	M31 Other necrotising vasculopathies	0.103101	0.132693	0.438476	0.359101	0.230937	0.122227	0.114176	0.195768	0.560684	141	TG	185.23	0.0102	774	419757
phecode-760-both_sexes	Back pain	-0.0210255	0.02708	0.438808	-0.0168396	0.0474029	0.722945	-0.0475224	0.0403993	0.241465	141	TG	160.737	0.14	17794	402737
phecode-634-females	Miscarriage; stillbirth	-0.0418534	0.0539616	0.439285	-0.0626641	0.0944796	0.508266	0.0163827	0.087135	0.851137	141	TG	158.443	0.1723	4326	219979
phecode-733.8-both_sexes	Malunion and nonunion of fracture	-0.0602724	0.0779135	0.440483	-0.087703	0.13642	0.521354	-0.059125	0.123994	0.634222	141	TG	122.171	0.8833	1494	397835
icd10-Z13-both_sexes	Z13 Special screening examination for other diseases and disorders	-0.0255851	0.0331311	0.441275	-0.0123028	0.0579611	0.832216	-0.0296922	0.0502979	0.555923	141	TG	163.588	0.1077	11721	408810
phecode-530.6-both_sexes	Diverticulum of esophagus, acquired	0.187521	0.242867	0.441349	1.38042	0.407272	0.000911706	0.781641	0.379998	0.0415462	141	TG	159.635	0.1569	198	371349
phecode-610.4-females	Benign neoplasm of breast	0.0592003	0.0767572	0.441848	-0.14479	0.132756	0.277317	-0.0451416	0.122954	0.714066	141	TG	133.337	0.6833	1685	219947
icd10-Z32-both_sexes	Z32 Pregnancy examination and test	-0.0657538	0.0852785	0.441978	0.116156	0.148097	0.434185	0.0999313	0.108811	0.35999	141	TG	280.868	0.0001	185	420346
phecode-721.8-both_sexes	Other allied disorders of spine	0.162613	0.211537	0.443352	-0.435037	0.36513	0.235505	-0.298809	0.375398	0.427392	141	TG	118.612	0.926	195	401917
phecode-512-both_sexes	Other symptoms of respiratory system	-0.0210229	0.0273489	0.443371	-0.0306544	0.0478687	0.522977	-0.0305385	0.0440033	0.48883	141	TG	147.926	0.3566	15687	404844
phecode-429-both_sexes	Ill-defined descriptions and complications of heart disease	0.0785123	0.102256	0.443898	-0.00370398	0.178903	0.983512	0.0735204	0.158178	0.642799	141	TG	147.825	0.3586	1047	412106
categorical-20001-both_sexes-1061	Cancer code, self-reported	-0.0430449	0.0560688	0.443949	0.0639254	0.0975204	0.513224	0.0871558	0.0856661	0.310723	141	TG	162.867	0.1154	3947	416526
icd10-Z40-both_sexes	Z40 Prophylactic surgery	0.0821863	0.107187	0.444516	0.2159	0.187094	0.250494	0.0429826	0.170782	0.801656	141	TG	128.285	0.7858	835	419696
phecode-225.1-both_sexes	Benign neoplasm of brain, cranial nerves, meninges	0.0757987	0.0990171	0.445256	0.015926	0.173132	0.92684	-0.000658947	0.161625	0.996753	141	TG	127.175	0.806	963	418389
phecode-433.11-both_sexes	Occlusion of cerebral arteries, with cerebral infarction	-0.191311	0.250395	0.44613	-0.437686	0.437503	0.318847	-0.214788	0.383122	0.575949	141	TG	152.034	0.2776	179	407633
phecode-752.1-both_sexes	Neural tube defects	0.134591	0.176767	0.447697	0.150674	0.309463	0.627105	0.0479933	0.319745	0.880903	141	TG	125.441	0.8347	294	419889
phecode-290.16-both_sexes	Vascular dementia	0.150663	0.198449	0.449007	0.187339	0.347404	0.590574	-0.13896	0.248822	0.577413	141	TG	236.82	0.0001	444	410833
phecode-480.5-both_sexes	Bronchopneumonia and lung abscess	0.106731	0.140675	0.449306	0.631172	0.240234	0.00957239	0.205761	0.212538	0.334658	141	TG	157.845	0.1796	589	405999
categorical-20002-both_sexes-1240	Non-cancer illness code, self-reported	-0.238777	0.314854	0.449503	-0.145583	0.551484	0.792184	-0.914412	0.494379	0.0664769	141	TG	145.48	0.4049	108	420365
categorical-22128-both_sexes-22128	Doctor diagnosed emphysema	0.135164	0.178636	0.450533	-0.0308986	0.311866	0.92122	0.339396	0.285131	0.235936	141	TG	147.18	0.3716	328	105913
phecode-752-both_sexes	Nervous system congenital anomalies	-0.123514	0.163329	0.450783	0.00586533	0.285627	0.983646	-0.12804	0.259299	0.622226	141	TG	139.268	0.5455	385	419889
phecode-710.19-both_sexes	Unspecified osteomyelitis	-0.0876489	0.115974	0.451062	0.0398759	0.202569	0.844232	-0.112164	0.190901	0.557779	141	TG	132.918	0.6899	731	372332
phecode-745-both_sexes	Pain in joint	0.0267524	0.0354376	0.451568	0.098681	0.0615885	0.111368	0.0580027	0.0523493	0.269764	141	TG	158.893	0.1657	9704	410827
icd10-I74-both_sexes	I74 Arterial embolism and thrombosis	0.0936066	0.124239	0.452449	0.45886	0.214228	0.0339425	0.312484	0.156585	0.0479164	141	TG	227.877	0.0001	1114	419417
icd10-G30-both_sexes	G30 Alzheimer's disease	0.177603	0.236379	0.453705	-0.0461156	0.413218	0.911301	-0.127955	0.189011	0.499542	141	TG	620.744	0.0001	831	419700
phecode-603-males	Other disorders of testis	-0.0476399	0.0634197	0.453802	-0.0267776	0.111038	0.809788	-0.0400652	0.104242	0.701304	141	TG	138.351	0.5656	2596	169119
phecode-710.1-both_sexes	Osteomyelitis	-0.0874877	0.116483	0.453869	0.0493933	0.203393	0.808482	-0.114378	0.185388	0.53826	141	TG	134.293	0.6618	732	372332
phecode-259-both_sexes	Other endocrine disorders	0.159518	0.212478	0.454065	0.360693	0.371526	0.333314	0.174941	0.334367	0.601662	141	TG	137.416	0.5867	220	415877
phecode-427.2-both_sexes	Atrial fibrillation and flutter	0.0264135	0.0352407	0.454803	0.0401101	0.0616652	0.516475	0.0376094	0.0411186	0.361944	141	TG	273.374	0.0001	19233	384657
icd10-F01-both_sexes	F01 Vascular dementia	0.147189	0.196415	0.454887	0.179799	0.343832	0.601857	-0.128167	0.25232	0.612286	141	TG	232.112	0.0001	444	420087
phecode-613.8-both_sexes	Other specified disorders of breast	-0.100962	0.134769	0.455024	-0.000137371	0.235733	0.999536	0.0117018	0.248466	0.962504	141	TG	99.9021	0.9978	379	418289
categorical-20002-both_sexes-1243	Non-cancer illness code, self-reported	-0.106803	0.142574	0.455051	-0.0197784	0.249463	0.936921	-0.0401606	0.253772	0.874484	141	TG	109.399	0.9819	398	420075
icd10-R77-both_sexes	R77 Other abnormalities of plasma proteins	-0.165061	0.220551	0.455473	-0.129368	0.386123	0.738098	0.183763	0.361005	0.611532	141	TG	134.265	0.6622	202	420329
categorical-20002-both_sexes-1640	Non-cancer illness code, self-reported	-0.237032	0.316697	0.45552	0.0418414	0.546491	0.939087	0.172444	0.507777	0.734694	133	TG	132.91	0.5082	106	420367
categorical-20002-both_sexes-1502	Non-cancer illness code, self-reported	-0.0357145	0.0477333	0.455588	-0.114342	0.0830689	0.170888	-0.0755568	0.0851736	0.376551	141	TG	107.411	0.9873	3540	416933
icd10-C88-both_sexes	C88 Malignant immunoproliferative diseases	-0.207675	0.277599	0.455647	-0.284896	0.485318	0.558136	-0.213525	0.420693	0.612564	141	TG	149.637	0.3223	142	420389
icd10-E61-both_sexes	E61 Deficiency of other nutrient elements	0.128741	0.172181	0.455891	0.156248	0.301216	0.604779	-0.0341628	0.282333	0.903863	141	TG	142.996	0.4591	355	420176
phecode-384.4-both_sexes	Perforation of tympanic membrane	-0.0678734	0.0908802	0.45641	-0.154286	0.158919	0.333314	-0.118058	0.157097	0.453614	141	TG	126.915	0.811	1143	416007
phecode-345.3-both_sexes	Convulsions	-0.0462997	0.062099	0.457172	0.0606965	0.1082	0.575723	-0.0237435	0.0988363	0.810503	141	TG	141.706	0.4876	2752	403249
categorical-20002-both_sexes-1142	Non-cancer illness code, self-reported	0.0503679	0.0676223	0.457616	-0.0116924	0.118344	0.92144	-0.128768	0.103808	0.216884	141	TG	180.443	0.0168	2933	417540
phecode-276.1-both_sexes	Electrolyte imbalance	-0.0314944	0.0422939	0.457728	-0.0659006	0.0739553	0.374423	-0.093678	0.0669474	0.163942	141	TG	148.838	0.3385	6406	409482
phecode-150-both_sexes	Cancer of esophagus	-0.0813865	0.109328	0.457868	0.132066	0.190125	0.48845	-0.0535636	0.172146	0.756148	141	TG	158.2	0.1735	985	400294
phecode-350.3-both_sexes	Lack of coordination	0.116559	0.156697	0.458217	0.0641035	0.274128	0.81545	0.0464993	0.244517	0.849453	141	TG	154.357	0.235	463	415922
icd10-Z89-both_sexes	Z89 Acquired absence of limb	0.109966	0.148076	0.458951	0.23642	0.258862	0.362662	0.0613754	0.229091	0.789164	141	TG	177.583	0.0235	598	419933
phecode-946-both_sexes	Anaphylactic shock NOS	-0.101765	0.137052	0.459012	0.0108041	0.239743	0.96412	-0.255942	0.201663	0.206492	141	TG	166.165	0.0849	657	412489
icd10-Q65-both_sexes	Q65 Congenital deformities of hip	-0.221152	0.297951	0.459183	0.144172	0.519735	0.781888	0.314011	0.477413	0.511788	141	TG	148.157	0.3522	122	420409
phecode-755.61-both_sexes	Congenital hip dysplasia and deformity	-0.220684	0.298156	0.460439	0.145103	0.520086	0.780661	0.328711	0.487819	0.501525	141	TG	148.118	0.3528	122	419170
categorical-2443-both_sexes-2443	Diabetes diagnosed by doctor	-0.0511588	0.0691976	0.460953	-0.329812	0.117612	0.00576584	0.0379246	0.0518945	0.466121	141	TG	1108.1	0.0001	20294	399083
phecode-459.9-both_sexes	Circulatory disease NEC	0.0209222	0.0283135	0.461176	0.0424444	0.0495044	0.392707	0.0273786	0.0401585	0.496515	141	TG	207.192	0.0001	21212	392807
phecode-575.2-both_sexes	Obstruction of bile duct	0.0838241	0.113491	0.46139	-0.231098	0.195913	0.240176	0.0134094	0.166573	0.935953	141	TG	180.348	0.0168	1038	399542
categorical-20002-both_sexes-1568	Non-cancer illness code, self-reported	-0.057556	0.0779795	0.461694	0.14716	0.134642	0.276297	0.145446	0.140673	0.302953	141	TG	116.519	0.9448	1412	419061
phecode-386.1-both_sexes	Meniere's disease	-0.0834468	0.113097	0.461851	-0.199655	0.19759	0.314037	-0.00777579	0.192267	0.967798	141	TG	122.404	0.8805	706	412745
categorical-20002-both_sexes-1077	Non-cancer illness code, self-reported	0.0496494	0.0672939	0.461871	0.0851673	0.117754	0.470733	0.0140909	0.10499	0.893428	141	TG	140.905	0.5044	2321	418152
phecode-285.22-both_sexes	Anemia in neoplastic disease	-0.103742	0.140808	0.462502	-0.202157	0.246433	0.413431	0.0425202	0.222393	0.848651	141	TG	143.226	0.4543	534	396365
phecode-512.9-both_sexes	Other dyspnea	0.065634	0.0894305	0.46423	0.296604	0.154814	0.0574339	0.0345482	0.167104	0.836508	141	TG	117.713	0.935	1079	404844
categorical-20002-both_sexes-1161	Non-cancer illness code, self-reported	0.179247	0.244254	0.464263	-0.347272	0.423805	0.413952	-0.0514612	0.35337	0.884423	141	TG	183.569	0.0115	226	420247
phecode-302-both_sexes	Sexual and gender identity disorders	0.121888	0.166193	0.464535	-0.496007	0.283781	0.082698	0.0164015	0.271394	0.951896	141	TG	134.133	0.6663	357	369930
icd10-Y40-both_sexes	Y40 Systemic antibiotics	0.076214	0.103959	0.464712	-0.0998733	0.181045	0.582074	0.0102085	0.173838	0.953255	141	TG	132.03	0.7091	897	419634
phecode-870.2-both_sexes	Open wound of ear	-0.0540721	0.0738718	0.465409	0.00273094	0.129176	0.983163	-0.178505	0.122447	0.147131	141	TG	134.905	0.6453	1838	400468
icd10-S27-both_sexes	S27 Injury of other and unspecified intrathoracic organs	0.190424	0.260301	0.465666	0.0235893	0.45553	0.958775	0.0191231	0.407186	0.962609	141	TG	170.367	0.0567	185	420346
categorical-20001-both_sexes-1011	Cancer code, self-reported	-0.24503	0.335252	0.466071	-0.0180319	0.586948	0.975536	-0.0299327	0.483727	0.950747	141	TG	204.594	0.0003	134	420339
icd10-Z22-both_sexes	Z22 Carrier of infectious disease	-0.0597493	0.081757	0.466113	0.1283	0.141801	0.367144	0.0066422	0.132321	0.960036	141	TG	133.058	0.6875	1472	419059
phecode-751.1-both_sexes	Congenital anomalies of genital organs	-0.0867119	0.118938	0.467187	-0.12265	0.208176	0.556707	0.0320485	0.184824	0.862588	141	TG	154.357	0.2345	803	417905
icd10-S89-both_sexes	S89 Other and unspecified injuries of lower leg	0.135865	0.186739	0.468094	0.38932	0.325803	0.234139	0.206375	0.286368	0.472319	141	TG	141.317	0.496	299	420232
icd10-I87-both_sexes	I87 Other disorders of veins	0.101166	0.139071	0.468171	0.19287	0.243289	0.429267	0.218376	0.220595	0.32391	141	TG	162.5	0.1187	623	419908
icd10-S67-both_sexes	S67 Crushing injury of wrist and hand	-0.166012	0.229108	0.469905	-0.871668	0.394214	0.028659	-0.642335	0.380821	0.0938861	141	TG	138.299	0.5683	193	420338
phecode-636.3-females	Hemorrhage in early pregnancy	0.0714137	0.0986098	0.470149	-0.0965786	0.172069	0.575513	0.0988527	0.144798	0.495929	141	TG	143.841	0.4415	1126	219979
icd10-R63-both_sexes	R63 Symptoms and signs concerning food and fluid intake	0.035162	0.0486037	0.470615	0.0378684	0.0850799	0.656945	0.0462722	0.0610045	0.449424	141	TG	263.961	0.0001	8570	411961
phecode-747.11-both_sexes	Cardiac shunt/ heart septal defect	-0.0941946	0.130324	0.471024	-0.280918	0.227233	0.218449	-0.106056	0.204728	0.605252	141	TG	161.592	0.1294	701	416857
phecode-290.11-both_sexes	Alzheimer's disease	0.173274	0.239764	0.471078	-0.0518369	0.419159	0.901756	-0.160988	0.179856	0.372274	141	TG	644.69	0.0001	839	410833
phecode-180.1-females	Cervical cancer	-0.123629	0.171098	0.471152	0.0249214	0.299198	0.933738	0.0542415	0.297038	0.85537	141	TG	119.687	0.9155	299	198725
categorical-20001-both_sexes-1022	Cancer code, self-reported	0.0795995	0.110466	0.472372	0.0752885	0.19342	0.697687	0.120236	0.142234	0.399363	141	TG	227.09	0.0001	1384	419089
icd10-Q27-both_sexes	Q27 Other congenital malformations of peripheral vascular system	-0.179522	0.249175	0.47244	-0.85185	0.430548	0.0498462	-0.346543	0.394367	0.381052	141	TG	137.884	0.5769	163	420368
phecode-610.1-females	Cystic mastopathy	0.0720994	0.100147	0.472763	0.185375	0.175052	0.291451	-0.0457839	0.159457	0.774442	141	TG	134.043	0.6677	991	219947
phecode-300.3-both_sexes	Obsessive-compulsive disorders	-0.154244	0.214266	0.472803	-0.063472	0.374829	0.865779	-0.264865	0.364337	0.468454	141	TG	120.609	0.9046	193	369930
icd10-Z52-both_sexes	Z52 Donors of organs and tissues	0.10995	0.15284	0.473107	0.0934122	0.267403	0.727369	-0.121372	0.261649	0.643458	141	TG	129.177	0.7667	405	420126
phecode-159.2-both_sexes	Malignant neoplasm of small intestine, including duodenum	-0.156448	0.217582	0.473322	-0.772346	0.375512	0.0415771	-0.598284	0.324449	0.067297	141	TG	156.763	0.194	244	400294
icd10-C17-both_sexes	C17 Malignant neoplasm of small intestine	-0.155497	0.217417	0.475675	-0.768401	0.375254	0.0424739	-0.617036	0.32912	0.0629027	141	TG	156.363	0.2004	244	420287
icd10-Z45-both_sexes	Z45 Adjustment and management of implanted device	0.0346058	0.048429	0.476067	0.049864	0.084724	0.55712	0.0575604	0.0781856	0.46284	141	TG	127.338	0.804	4033	416498
phecode-523.1-both_sexes	Gingivitis	0.186065	0.261129	0.477317	0.149329	0.45682	0.744244	0.104969	0.429798	0.807412	141	TG	125.155	0.8374	135	408157
categorical-20002-both_sexes-1501	Non-cancer illness code, self-reported	0.215262	0.302691	0.478167	0.491175	0.528362	0.35418	0.70025	0.487987	0.153524	141	TG	145.902	0.3959	117	420356
phecode-550.3-both_sexes	Femoral hernia	0.0733478	0.10314	0.478177	0.092142	0.180516	0.610556	0.0674201	0.19532	0.730479	141	TG	114.736	0.9575	786	363863
phecode-198.3-both_sexes	Secondary malignant neoplasm of digestive systems	0.0473708	0.0666858	0.478664	-0.0638763	0.116184	0.583349	0.0142451	0.108755	0.895976	141	TG	126.244	0.8215	2107	367856
icd10-H50-both_sexes	H50 Other strabismus	-0.0667851	0.0940853	0.478987	0.0844411	0.163978	0.607403	0.0308295	0.162902	0.850169	141	TG	126.803	0.8125	1060	419471
phecode-601.12-males	Chronic prostatitis	0.0760095	0.107329	0.480003	-0.0999779	0.186948	0.593649	0.0412786	0.157066	0.793083	141	TG	171.089	0.0524	1106	169762
phecode-380.4-both_sexes	Impacted cerumen	-0.112341	0.15875	0.480332	-0.0207572	0.277595	0.940501	0.0152709	0.25778	0.952845	141	TG	139.624	0.5365	407	418820
phecode-402-both_sexes	Elevated blood pressure reading without diagnosis of hypertension	-0.0585396	0.0827484	0.480468	0.0567379	0.144415	0.695009	-0.0229381	0.124229	0.853776	141	TG	168.088	0.0724	1841	325488
phecode-532-both_sexes	Dysphagia	0.0259052	0.037012	0.485142	0.0524319	0.0647363	0.419364	0.0234342	0.0572431	0.682886	141	TG	150.093	0.315	8401	371349
phecode-184-females	Cancer of other female genital organs	0.0489795	0.0699865	0.485187	0.0589027	0.122499	0.631384	0.161952	0.127302	0.205414	141	TG	111.412	0.9749	1686	207089
icd10-O81-both_sexes	O81 Single delivery by forceps and vacuum extractor	0.0421148	0.0602341	0.485596	0.025571	0.105429	0.808718	-0.0262431	0.0939998	0.780517	141	TG	139.608	0.5356	151	420380
phecode-255.1-both_sexes	Adrenal hyperfunction	0.13182	0.188669	0.485906	0.483232	0.328138	0.143107	0.332183	0.33041	0.316455	141	TG	106.939	0.9887	221	415877
icd10-W31-both_sexes	W31 Contact with other and unspecified machinery	-0.103508	0.148173	0.485985	0.0848522	0.258616	0.743329	0.110522	0.222051	0.619453	141	TG	166.334	0.0842	558	419973
icd10-K41-both_sexes	K41 Femoral hernia	0.075118	0.107657	0.486489	0.134729	0.188288	0.475473	0.00819885	0.194025	0.966354	141	TG	119.614	0.9175	760	419771
icd10-B17-both_sexes	B17 Other acute viral hepatitis	-0.176421	0.253728	0.48801	-0.136311	0.444458	0.759538	-0.0606589	0.425787	0.886919	141	TG	135.824	0.6252	155	420376
phecode-531-both_sexes	Peptic ulcer (excl. esophageal)	-0.026043	0.0376427	0.490178	-0.0536344	0.0658832	0.41699	-0.0554255	0.0598506	0.356006	141	TG	165.695	0.0897	9015	411516
phecode-145-both_sexes	Cancer of mouth	-0.094848	0.137115	0.490247	0.100235	0.239305	0.675965	0.0416119	0.196404	0.832517	141	TG	197.207	0.0014	774	418011
categorical-20002-both_sexes-1291	Non-cancer illness code, self-reported	-0.0701948	0.10155	0.490564	-0.226484	0.177023	0.202886	-0.0676068	0.155806	0.665018	141	TG	162.283	0.1219	1159	419314
icd10-J17-both_sexes	J17 Pneumonia in diseases classified elsewhere	0.148771	0.21528	0.490675	0.423492	0.3759	0.261849	0.224488	0.374121	0.549448	141	TG	116.163	0.948	185	420346
icd10-T45-both_sexes	T45 Poisoning by primarily systemic and haematological agents, not elsewhere classified	0.155703	0.225447	0.490936	0.114393	0.394785	0.77243	0.251837	0.342275	0.463099	141	TG	168.386	0.0701	243	420288
phecode-174.11-females	Malignant neoplasm of female breast	0.0245394	0.0355753	0.491469	-0.054641	0.0617141	0.377475	-0.0154189	0.0508132	0.762003	141	TG	184.013	0.0112	11807	205913
phecode-830-both_sexes	Dislocation	-0.0291584	0.0423557	0.492329	-0.0254475	0.0741834	0.73209	-0.0323007	0.0692221	0.641494	141	TG	128.594	0.7795	5424	397432
phecode-331.1-both_sexes	Hydrocephalus	0.089982	0.130745	0.49245	0.0831104	0.228888	0.717078	-0.00889662	0.216449	0.967273	141	TG	149.278	0.3304	646	403249
phecode-743.2-both_sexes	Pathologic fracture	-0.087648	0.127379	0.492536	0.0491285	0.222617	0.825661	-0.157352	0.198042	0.428226	141	TG	155.817	0.2099	709	411038
icd10-T85-both_sexes	T85 Complications of other internal prosthetic devices, implants and grafts	0.0390726	0.0568827	0.493283	0.0117527	0.0995342	0.906177	0.0310379	0.0967115	0.74874	141	TG	123.765	0.8598	2835	417696
phecode-728.2-both_sexes	Laxity of ligament or hypermobility syndrome	0.103177	0.150226	0.493339	0.464977	0.260167	0.0760803	0.283848	0.225827	0.210874	141	TG	158.664	0.1682	517	386932
categorical-20001-both_sexes-1006	Cancer code, self-reported	-0.121234	0.176702	0.493788	-0.180136	0.309638	0.561669	-0.161069	0.283825	0.571288	141	TG	134.463	0.6566	318	420155
phecode-601.8-males	Other inflammatory disorders of male genital organs	0.130715	0.190796	0.49441	0.309583	0.333567	0.354965	0.222757	0.295162	0.4517	141	TG	171.389	0.0512	348	169762
icd10-I66-both_sexes	I66 Occlusion and stenosis of cerebral arteries, not resulting in cerebral infarction	0.208136	0.303921	0.494579	0.0405261	0.532444	0.939438	0.0751424	0.531032	0.887676	141	TG	130.894	0.7313	104	420427
icd10-S79-both_sexes	S79 Other and unspecified injuries of hip and thigh	0.142633	0.208294	0.494624	0.0825823	0.364743	0.821213	0.298845	0.346908	0.390462	141	TG	146.476	0.3856	247	420284
phecode-522.5-both_sexes	Periapical abscess	0.0556612	0.0813685	0.495066	0.0622342	0.142365	0.662684	-0.113533	0.135576	0.403791	141	TG	124.296	0.8498	1392	408157
phecode-184.11-females	Malignant neoplasm of ovary	0.0609466	0.0892869	0.495992	-0.0147393	0.156091	0.924906	0.0799843	0.1504	0.5957	141	TG	123.703	0.8622	1147	207089
phecode-333-both_sexes	Extrapyramidal disease and abnormal movement disorders	0.060441	0.0885914	0.496212	0.112495	0.154951	0.469058	0.175688	0.150668	0.245575	141	TG	139.38	0.5424	1314	403249
icd10-O47-both_sexes	O47 False labour	-0.06897	0.101106	0.496269	-0.136213	0.176824	0.44241	-0.00566507	0.159573	0.971731	141	TG	151.069	0.2965	1070	419461
phecode-519.2-both_sexes	Respiratory complications	-0.124741	0.183323	0.497349	-0.29462	0.320708	0.359868	-0.112947	0.284823	0.692303	141	TG	158.925	0.1651	350	407792
phecode-291.4-both_sexes	Specific nonpsychotic mental disorders due to brain damage	0.111913	0.164685	0.497908	-0.356281	0.284557	0.212652	-0.062725	0.259471	0.809334	141	TG	162.475	0.1193	444	410833
phecode-528.6-both_sexes	Leukoplakia of oral mucosa	-0.0989118	0.145567	0.497949	-0.162022	0.254861	0.526	-0.133837	0.264362	0.613467	141	TG	109.879	0.9803	382	413830
icd10-L23-both_sexes	L23 Allergic contact dermatitis	0.192529	0.283341	0.497953	0.687538	0.493146	0.165501	0.2369	0.46004	0.607402	140	TG	126.638	0.8049	117	420414
icd10-Y44-both_sexes	Y44 Agents primarily affecting blood constituents	0.10713	0.157735	0.498149	-0.0983599	0.275179	0.721304	-0.0848948	0.265256	0.749409	141	TG	137.051	0.5958	404	420127
categorical-20002-both_sexes-1386	Non-cancer illness code, self-reported	0.0389392	0.0575573	0.499821	0.193335	0.0994341	0.0538728	0.0857361	0.0929499	0.357911	141	TG	165.376	0.0917	3707	416766
phecode-550.2-both_sexes	Diaphragmatic hernia	0.0200824	0.0297063	0.500136	-0.0360619	0.0516883	0.486542	0.00233513	0.0307906	0.939655	141	TG	334.466	0.0001	33482	363863
phecode-750.21-both_sexes	Congenital anomalies of intestine	0.132189	0.195622	0.500321	0.568319	0.339513	0.0963945	-0.0796312	0.324285	0.806383	141	TG	141.446	0.4934	271	417905
phecode-761-both_sexes	Cervicalgia	0.0495128	0.073275	0.500338	-0.0913292	0.127429	0.474757	0.0334195	0.114559	0.770931	141	TG	162.946	0.1142	2264	418267
phecode-384-both_sexes	Other disorders of tympanic membrane	-0.0606934	0.089894	0.500684	-0.070719	0.157429	0.653978	-0.154435	0.134231	0.25189	141	TG	160.28	0.1473	1484	416007
icd10-W03-both_sexes	W03 Other fall on same level due to collision with, or pushing by, another person	-0.125723	0.186226	0.500721	-0.247196	0.326127	0.449749	-0.181164	0.309558	0.559332	141	TG	135.652	0.628	289	420242
icd10-H49-both_sexes	H49 Paralytic strabismus	-0.103029	0.152637	0.500793	-0.0509027	0.267155	0.849167	-0.120322	0.255734	0.638732	141	TG	110.677	0.9776	350	420181
phecode-789-both_sexes	Nausea and vomiting	-0.0199507	0.0295908	0.501284	-0.0518645	0.0517102	0.317611	-0.0146604	0.0465173	0.753109	141	TG	161.468	0.1312	14411	406120
categorical-20002-both_sexes-1575	Non-cancer illness code, self-reported	0.164775	0.24492	0.502202	-0.6201	0.42071	0.142759	0.054308	0.395768	0.891053	141	TG	129.642	0.7575	156	420317
icd10-D04-both_sexes	D04 Carcinoma in situ of skin	-0.0769082	0.11458	0.503187	-0.0749602	0.200551	0.709144	-0.112948	0.166889	0.499659	141	TG	165.707	0.0887	935	419596
phecode-170.2-both_sexes	Cancer of connective tissue	0.0950907	0.141795	0.503568	0.128959	0.248136	0.604091	0.0177566	0.252856	0.944115	141	TG	110.962	0.9766	405	419977
icd10-Z76-both_sexes	Z76 Persons encountering health services in other circumstances	-0.13904	0.208168	0.505283	-0.21531	0.364286	0.555449	-0.0148321	0.352822	0.966528	141	TG	123.063	0.8712	209	420322
phecode-564.8-both_sexes	Abnormal findings on exam of gastrointestinal tract/ abdominal area	0.0471752	0.0707561	0.506042	0.0573266	0.123815	0.644086	0.0719803	0.116085	0.536222	141	TG	149.423	0.3278	2204	330270
icd10-X64-both_sexes	X64 Intentional self-poisoning by and exposure to other and unspecified drugs, medicaments and biological substances	-0.084324	0.126593	0.50644	-0.0731099	0.221781	0.742161	-0.130736	0.212524	0.539448	141	TG	139.247	0.5465	640	419891
phecode-420.2-both_sexes	Pericarditis	-0.0538375	0.080827	0.506454	-0.0190527	0.141465	0.893059	-0.0829683	0.120322	0.491617	141	TG	148.343	0.348	1687	416313
icd10-S02-both_sexes	S02 Fracture of skull and facial bones	0.0991872	0.149233	0.507371	-0.35595	0.25707	0.16838	-0.147703	0.234539	0.52988	141	TG	152.453	0.2699	503	420028
phecode-577.3-both_sexes	Cyst and pseudocyst of pancreas	-0.0915912	0.137833	0.507458	-0.381164	0.239434	0.113671	-0.441817	0.232169	0.0590945	141	TG	127.69	0.7971	492	417106
categorical-20002-both_sexes-1474	Non-cancer illness code, self-reported	0.0322865	0.0486145	0.507698	-0.135871	0.0833008	0.105134	-0.0471873	0.0550222	0.392577	141	TG	296.447	0.0001	9850	410623
icd10-M94-both_sexes	M94 Other disorders of cartilage	-0.118539	0.17882	0.508487	-0.262583	0.312615	0.402375	-0.290872	0.28164	0.303489	141	TG	150.971	0.2993	347	420184
phecode-250.6-both_sexes	Polyneuropathy in diabetes	0.0985804	0.148837	0.508844	-0.460077	0.254039	0.072293	-0.0492659	0.226623	0.82822	141	TG	154.716	0.2295	517	396181
phecode-797.1-both_sexes	Cardiogenic shock	0.184898	0.279297	0.509052	-0.341076	0.486005	0.48398	-0.0460687	0.467636	0.921665	141	TG	141.14	0.5008	133	420328
categorical-20002-both_sexes-1617	Non-cancer illness code, self-reported	-0.0691811	0.104553	0.509261	-0.0174822	0.182851	0.923969	0.0688883	0.170487	0.686779	141	TG	150.613	0.3054	1015	419458
icd10-F42-both_sexes	F42 Obsessive-compulsive disorder	-0.141798	0.214551	0.50976	-0.0737694	0.375405	0.844501	-0.277468	0.367639	0.451678	141	TG	120.33	0.9077	192	420339
icd10-S52-both_sexes	S52 Fracture of forearm	0.0735381	0.111286	0.509825	-0.196958	0.192758	0.308654	-0.00957472	0.167318	0.954448	141	TG	166.138	0.085	992	419539
phecode-686-both_sexes	Other local infections of skin and subcutaneous tissue	-0.047722	0.0722578	0.510056	-0.129672	0.12621	0.306005	0.0265413	0.126271	0.833823	141	TG	126.902	0.8125	1789	406937
categorical-20002-both_sexes-1082	Non-cancer illness code, self-reported	-0.0574875	0.087184	0.510734	0.039999	0.152279	0.793194	-0.200678	0.130229	0.125584	141	TG	161.868	0.1265	1576	418897
phecode-793.2-both_sexes	Nonspecific abnormal findings on radiological and other examination of other intrathoracic organs (echocardiogram, etc)	-0.069357	0.105345	0.511377	0.141147	0.183315	0.442623	-0.0305417	0.193709	0.874946	141	TG	111.809	0.9733	745	419608
icd10-U82-both_sexes	U82 Resistance to betalactam antibiotics	0.132859	0.202187	0.51219	0.228396	0.353731	0.519552	0.0794235	0.307316	0.796445	141	TG	175.493	0.031	314	420217
icd10-H80-both_sexes	H80 Otosclerosis	-0.128158	0.195044	0.512213	-0.347717	0.340625	0.309112	-0.537213	0.300612	0.0760908	141	TG	165.275	0.0923	318	420213
icd10-F20-both_sexes	F20 Schizophrenia	-0.0870991	0.132608	0.512378	-0.39078	0.230097	0.0916839	-0.234141	0.206073	0.257812	141	TG	149.185	0.3314	625	419906
categorical-20002-both_sexes-1114	Non-cancer illness code, self-reported	-0.0767133	0.117109	0.513504	0.0729677	0.204385	0.721624	0.14333	0.172466	0.407355	141	TG	185.691	0.01	1000	419473
phecode-737-both_sexes	Curvature of spine	-0.0494332	0.0755105	0.513765	0.0406204	0.131801	0.758396	-0.109009	0.12274	0.375997	141	TG	138.415	0.5639	1794	403527
phecode-427.9-both_sexes	Palpitations	0.035148	0.0537359	0.514128	0.0368063	0.0940717	0.696205	0.0132273	0.0784888	0.866413	141	TG	176.714	0.0265	4620	384657
phecode-619.3-females	Noninflammatory disorders of cervix	-0.0340368	0.0522543	0.515876	0.0976135	0.0904924	0.282593	-0.0750429	0.0909131	0.410529	141	TG	124.566	0.8467	3438	212227
phecode-275.1-both_sexes	Disorders of iron metabolism	-0.103777	0.15966	0.516765	-0.291567	0.279205	0.298172	-0.345235	0.206016	0.0960159	141	TG	298.142	0.0001	839	417416
icd10-G51-both_sexes	G51 Facial nerve disorders	0.0718702	0.110595	0.516853	0.156569	0.193362	0.419487	0.190769	0.158229	0.229986	141	TG	173.023	0.0412	1046	419485
phecode-352.2-both_sexes	Facial nerve disorders [CN7]	0.0733768	0.11297	0.517063	0.196594	0.1973	0.320777	0.215989	0.154629	0.164678	141	TG	182.986	0.0122	1059	399339
phecode-241.2-both_sexes	Nontoxic multinodular goiter	-0.0871092	0.134222	0.517404	0.302944	0.231421	0.192673	0.0802044	0.18449	0.664424	141	TG	192.318	0.0032	787	399034
phecode-381.11-both_sexes	Suppurative and unspecified otitis media	-0.0707042	0.108957	0.517454	-0.258386	0.189943	0.175927	-0.155326	0.172288	0.368844	141	TG	150.331	0.3104	940	416007
phecode-524.3-both_sexes	Anomalies of tooth position/malocclusion	0.116145	0.179069	0.517655	0.174077	0.313219	0.579264	0.190717	0.276436	0.491391	141	TG	148.39	0.3459	341	408157
icd10-C50-both_sexes	C50 Malignant neoplasm of breast	0.0232745	0.0359416	0.518327	-0.0436366	0.0625189	0.486359	0.00291282	0.0495754	0.953231	141	TG	187.79	0.0067	11779	408752
icd10-S86-both_sexes	S86 Injury of muscle and tendon at lower leg level	-0.070251	0.108485	0.518329	-0.195063	0.189445	0.304961	-0.0545529	0.173335	0.753438	141	TG	138.119	0.5705	869	419662
icd10-H20-both_sexes	H20 Iridocyclitis	-0.102493	0.158448	0.518782	-0.0714297	0.277198	0.797031	-0.389353	0.237694	0.103659	141	TG	155.937	0.2083	454	420077
phecode-385-both_sexes	Other disorders of middle ear and mastoid	0.070969	0.109748	0.518913	0.126702	0.192135	0.510703	0.0361993	0.163315	0.824907	141	TG	154.154	0.2375	956	416007
icd10-N41-both_sexes	N41 Inflammatory diseases of prostate	0.047847	0.0739995	0.518959	-0.130461	0.128166	0.310491	-0.14847	0.119589	0.216493	141	TG	137.309	0.5898	1865	418666
icd10-W08-both_sexes	W08 Fall involving other furniture	-0.142508	0.220641	0.519414	-0.551955	0.384108	0.152971	-0.671561	0.391192	0.088245	141	TG	109.332	0.9823	165	420366
icd10-O60-both_sexes	O60 Preterm delivery	0.039132	0.06066	0.519916	-0.0345507	0.105911	0.744746	-0.021763	0.0960771	0.821131	141	TG	172.875	0.0427	646	419885
icd10-Q21-both_sexes	Q21 Congenital malformations of cardiac septa	-0.0845397	0.131142	0.520214	-0.241226	0.228897	0.293774	-0.0993565	0.201488	0.622704	141	TG	160.399	0.1454	687	419844
icd10-I48-both_sexes	I48 Atrial fibrillation and flutter	0.0226795	0.0352267	0.520748	0.041851	0.0616253	0.498191	0.0367799	0.0419031	0.38159	141	TG	274.502	0.0001	19218	401313
icd10-C41-both_sexes	C41 Malignant neoplasm of bone and articular cartilage of other and unspecified sites	0.166637	0.258837	0.520764	0.228737	0.452944	0.614357	0.0629906	0.445358	0.887727	141	TG	113.395	0.9646	124	420407
categorical-20002-both_sexes-1485	Non-cancer illness code, self-reported	-0.0679215	0.10562	0.521229	-0.112251	0.184624	0.54418	-0.20829	0.196859	0.291847	141	TG	96.1256	0.9992	638	419835
icd10-D61-both_sexes	D61 Other aplastic anaemias	-0.10047	0.156279	0.521347	0.115478	0.272724	0.67264	0.069894	0.21271	0.742958	141	TG	199.945	0.0008	606	419925
phecode-729.1-both_sexes	Rheumatism, unspecified and fibrositis	0.0690601	0.107743	0.52259	0.446738	0.18444	0.0167182	0.223001	0.172699	0.198738	141	TG	163.34	0.1092	1050	386932
phecode-291.8-both_sexes	Alteration of consciousness	0.0897524	0.140126	0.522888	0.286966	0.24454	0.242605	0.0333859	0.206395	0.87173	141	TG	167.19	0.0783	627	410833
icd10-D13-both_sexes	D13 Benign neoplasm of other and ill-defined parts of digestive system	0.0593654	0.0935439	0.526708	-0.253633	0.160533	0.116393	-0.0110433	0.137185	0.935955	141	TG	176.252	0.0285	1492	419039
icd10-S41-both_sexes	S41 Open wound of shoulder and upper arm	-0.160728	0.253305	0.526774	0.0877	0.442699	0.843254	0.0841845	0.412996	0.838776	141	TG	124.676	0.8442	143	420388
phecode-379.2-both_sexes	Disorders of vitreous body	0.0467591	0.073785	0.527297	0.0277119	0.129065	0.830306	0.0159628	0.122719	0.896693	141	TG	129.937	0.7516	1774	410363
categorical-20002-both_sexes-1137	Non-cancer illness code, self-reported	0.0803453	0.12776	0.530454	0.181881	0.22348	0.417118	0.0479237	0.227995	0.83382	141	TG	109.759	0.981	494	419979
icd10-I86-both_sexes	I86 Varicose veins of other sites	-0.0783232	0.124758	0.531156	0.0224608	0.218349	0.918217	-0.0302448	0.224004	0.892791	141	TG	121.353	0.895	572	419959
phecode-365.11-both_sexes	Primary open angle glaucoma	-0.0548555	0.0875209	0.531831	0.103507	0.152247	0.497725	-0.106399	0.137746	0.441165	141	TG	153.447	0.2513	1492	404535
phecode-134.1-both_sexes	Intestinal helminthiases	0.171686	0.274055	0.532028	-0.23134	0.478328	0.629401	0.000499561	0.421008	0.999055	141	TG	159.249	0.1618	156	419830
phecode-727-both_sexes	Other disorders of synovium, tendon, and bursa	-0.022144	0.03535	0.532059	0.0224998	0.0616931	0.715885	0.00710958	0.0500238	0.887186	141	TG	191.407	0.0034	11900	386932
phecode-365.1-both_sexes	Open-angle glaucoma	-0.0542867	0.0868035	0.532728	0.0985673	0.151053	0.515133	-0.086821	0.136945	0.527127	141	TG	151.385	0.2909	1498	404535
categorical-20002-both_sexes-1139	Non-cancer illness code, self-reported	-0.0532992	0.0854363	0.533743	-0.221155	0.148556	0.138833	-0.0204907	0.148297	0.890302	141	TG	130.385	0.7433	1311	419162
phecode-472-both_sexes	Chronic pharyngitis and nasopharyngitis	-0.0590399	0.0946635	0.533851	-0.271066	0.164388	0.101418	-0.0849907	0.148571	0.568202	141	TG	136.166	0.6178	1125	398757
phecode-480.11-both_sexes	Pneumococcal pneumonia	-0.0212682	0.0343265	0.536539	0.00324165	0.0600439	0.957022	0.0111417	0.061667	0.856884	141	TG	128.836	0.7749	8473	405999
icd10-G55-both_sexes	G55 Nerve root and plexus compressions in diseases classified elsewhere	-0.0345971	0.0559219	0.53714	0.0551903	0.0974207	0.571957	-0.0194813	0.0746238	0.794429	141	TG	213.152	0.0001	5159	415372
categorical-20002-both_sexes-1265	Non-cancer illness code, self-reported	-0.0246048	0.0398145	0.537589	0.0634744	0.0690499	0.359555	-0.0455257	0.0510696	0.374221	141	TG	246.415	0.0001	12423	408050
phecode-509.8-both_sexes	Dependence on respirator [Ventilator] or supplemental oxygen	-0.0852953	0.138245	0.538245	-0.0294236	0.242441	0.903578	-0.00624621	0.217828	0.977165	141	TG	144.05	0.4352	556	404684
categorical-20002-both_sexes-1412	Non-cancer illness code, self-reported	0.032502	0.0527163	0.538535	0.0996422	0.0919511	0.280399	0.0425934	0.0926599	0.646463	141	TG	116.116	0.9486	3110	417363
phecode-262-both_sexes	Mineral deficiency NEC	0.0995402	0.162232	0.540497	0.0935052	0.283789	0.742283	-0.0108915	0.282734	0.969326	141	TG	130.617	0.7391	365	416692
categorical-20002-both_sexes-1288	Non-cancer illness code, self-reported	-0.070307	0.114842	0.541395	-0.127485	0.200878	0.526705	-0.315635	0.203617	0.123366	141	TG	113.227	0.9657	631	419842
phecode-585-both_sexes	Renal failure	-0.023894	0.0390943	0.542066	-0.0493028	0.068386	0.472152	0.016271	0.0487663	0.739141	141	TG	262.775	0.0001	13777	401927
icd10-R56-both_sexes	R56 Convulsions, not elsewhere classified	-0.0381283	0.0624239	0.542325	0.063264	0.108813	0.561911	0.0301633	0.102333	0.768617	141	TG	127.911	0.7938	2457	418074
icd10-V23-both_sexes	V23 Motorcycle rider injured in collision with car, pick-up truck or van	-0.108025	0.176915	0.542452	0.0393439	0.30926	0.898951	-0.121066	0.286778	0.673557	141	TG	126.261	0.8209	297	420234
icd10-X59-both_sexes	X59 Exposure to unspecified factor	0.0301717	0.0494779	0.542982	-0.068138	0.086052	0.429812	-0.0126429	0.0816776	0.877209	141	TG	138.973	0.552	4242	416289
phecode-1005-both_sexes	Other symptoms	-0.0511671	0.0843064	0.544888	0.220643	0.14509	0.130599	0.0300421	0.125443	0.811077	141	TG	160.468	0.1446	1684	418847
phecode-229-both_sexes	Benign neoplasm of unspecified sites	0.0655274	0.107984	0.544948	-0.157787	0.187596	0.401736	-0.0743047	0.176623	0.674622	141	TG	144.167	0.433	909	419622
icd10-F32-both_sexes	F32 Depressive episode	0.0181076	0.0298594	0.545213	-0.0390789	0.0519175	0.452897	-0.0616856	0.04492	0.171875	141	TG	175.427	0.0314	15674	404857
phecode-371-both_sexes	Inflammation of the eye	0.046282	0.0766905	0.547159	-0.158775	0.132556	0.233034	-0.0737581	0.0896114	0.411858	141	TG	274.584	0.0001	3489	409073
icd10-M62-both_sexes	M62 Other disorders of muscle	-0.118672	0.197454	0.548805	0.0940122	0.344997	0.785641	-0.0589976	0.308944	0.84883	141	TG	155.018	0.2242	293	420238
icd10-H93-both_sexes	H93 Other disorders of ear, not elsewhere classified	0.0663477	0.110595	0.54953	-0.24263	0.190868	0.205785	-0.0778415	0.178606	0.663632	141	TG	135.94	0.6224	821	419710
phecode-334.1-both_sexes	Spinocerebellar disease	-0.154502	0.257592	0.549612	-0.0444441	0.450824	0.921611	0.0999869	0.394063	0.800074	141	TG	149.442	0.3263	166	403249
phecode-624.2-females	Atrophy of female genital tract	-0.0817437	0.136571	0.550445	0.0656883	0.238522	0.78342	-0.11059	0.228513	0.629174	141	TG	138.078	0.5729	545	216940
categorical-20002-both_sexes-1683	Non-cancer illness code, self-reported	-0.152465	0.255292	0.551328	0.498427	0.441594	0.260969	-0.378436	0.458872	0.410939	141	TG	113.869	0.9617	128	420345
phecode-681.7-both_sexes	Cellulitis and abscess of trunk	0.0701028	0.117927	0.553164	0.328781	0.204796	0.110673	0.148177	0.187414	0.43049	141	TG	148.768	0.3401	786	406937
icd10-M07-both_sexes	M07 Psoriatic and enteropathic arthropathies	-0.0944397	0.158894	0.553233	-0.147335	0.278279	0.597338	0.082233	0.234224	0.726051	141	TG	195.516	0.0019	571	419960
icd10-V28-both_sexes	V28 Motorcycle rider injured in noncollision transport accident	0.0970303	0.163264	0.553259	0.017016	0.285604	0.952577	0.0909438	0.262988	0.730005	141	TG	146.105	0.3921	403	420128
icd10-D12-both_sexes	D12 Benign neoplasm of colon, rectum, anus and anal canal	-0.0170292	0.028743	0.554496	-0.0230124	0.0503247	0.648184	-0.0186131	0.0426728	0.663376	141	TG	169.285	0.0644	16552	403979
categorical-20002-both_sexes-1441	Non-cancer illness code, self-reported	-0.0894472	0.151223	0.555146	-0.290369	0.263725	0.272787	-0.228501	0.241714	0.346115	141	TG	149.695	0.3231	483	419990
phecode-071-both_sexes	Human immunodeficiency virus [HIV] disease	0.165471	0.280596	0.556333	0.530097	0.489929	0.281132	0.247737	0.435928	0.570743	141	TG	139.08	0.5499	130	413496
icd10-F05-both_sexes	F05 Delirium, not induced by alcohol and other psychoactive substances	0.0740409	0.125849	0.557259	0.15999	0.220139	0.46859	0.0851783	0.148509	0.567189	141	TG	276.801	0.0001	1307	419224
phecode-1002-both_sexes	Symptoms concerning nutrition, metabolism, and development	0.0316516	0.0538131	0.557361	0.066448	0.0941348	0.481443	-0.00890058	0.0626339	0.887201	141	TG	281.566	0.0001	7469	413062
icd10-H91-both_sexes	H91 Other hearing loss	0.0298106	0.0507154	0.557612	0.0789676	0.0885796	0.374208	0.0562386	0.0813988	0.490771	141	TG	146.322	0.3872	4236	416295
icd10-J96-both_sexes	J96 Respiratory failure, not elsewhere classified	-0.0451068	0.076874	0.558308	0.154252	0.132982	0.24806	-0.00876068	0.112902	0.938261	141	TG	201.954	0.0005	2556	417975
icd10-I49-both_sexes	I49 Other cardiac arrhythmias	0.0305145	0.0520211	0.558431	0.0125768	0.0910332	0.890317	-0.0170616	0.0867222	0.844317	141	TG	127.625	0.7983	3530	417001
icd10-Y54-both_sexes	Y54 Agents primarily affecting water-balance and mineral and uric acid metabolism	-0.0981997	0.167884	0.559539	-0.392119	0.292406	0.182105	-0.172602	0.262558	0.512012	141	TG	147.908	0.3564	388	420143
phecode-459-both_sexes	Other disorders of circulatory system	0.0164363	0.0281371	0.560059	0.036829	0.0492002	0.455391	0.0172032	0.0378141	0.649856	141	TG	207.002	0.0001	21420	392807
categorical-20002-both_sexes-1264	Non-cancer illness code, self-reported	-0.0340844	0.0584532	0.560761	-0.0207707	0.102319	0.839432	-0.0808576	0.0902127	0.371631	141	TG	159.959	0.1514	3500	416973
icd10-H02-both_sexes	H02 Other disorders of eyelid	0.0253394	0.0434967	0.561128	0.0924907	0.0758174	0.224563	0.070848	0.066803	0.29072	141	TG	170.502	0.0567	6766	413765
icd10-S05-both_sexes	S05 Injury of eye and orbit	-0.111809	0.192182	0.561645	0.485498	0.330933	0.14462	0.0468519	0.277605	0.86622	141	TG	201.931	0.0005	402	420129
phecode-364.9-both_sexes	Cornea replaced by transplant	-0.138463	0.238554	0.562559	0.248729	0.415577	0.550471	0.0580462	0.432281	0.893375	141	TG	117.845	0.9333	151	404535
icd10-M70-both_sexes	M70 Soft tissue disorders related to use, overuse and pressure	-0.0500659	0.0862992	0.56275	0.0837282	0.150349	0.578498	0.0271301	0.14038	0.847034	141	TG	148.165	0.3507	1465	419066
phecode-296-both_sexes	Mood disorders	0.0480855	0.0830759	0.563645	-0.105099	0.144519	0.468305	-0.0223472	0.120345	0.852954	141	TG	167.973	0.0732	1825	369930
phecode-145.2-both_sexes	Cancer of tongue	-0.104558	0.180999	0.564412	-0.118904	0.316979	0.708145	-0.132309	0.271838	0.627216	141	TG	163.965	0.1032	369	418011
categorical-20002-both_sexes-1469	Non-cancer illness code, self-reported	-0.109535	0.189925	0.565049	-0.453787	0.330492	0.171943	-0.360537	0.288183	0.212996	141	TG	141.504	0.4908	285	420188
phecode-587-both_sexes	Kidney replaced by transpant	-0.0925296	0.161684	0.568045	-0.0630271	0.283122	0.824162	-0.00396619	0.250958	0.987413	141	TG	153.794	0.2449	434	401927
phecode-527-both_sexes	Diseases of the salivary glands	-0.0507776	0.0887799	0.568274	-0.0254997	0.155428	0.869922	-0.15284	0.145982	0.296914	141	TG	130.478	0.7398	1228	413830
phecode-401.3-both_sexes	Other hypertensive complications	0.134473	0.235155	0.568343	-0.882062	0.39836	0.0284416	0.140035	0.404602	0.729782	141	TG	127.71	0.7953	169	325488
phecode-284-both_sexes	Aplastic anemia	-0.0885444	0.154883	0.568452	0.160177	0.269989	0.553963	0.0429606	0.231648	0.85314	141	TG	200.795	0.0007	618	396365
icd10-N91-both_sexes	N91 Absent, scanty and rare menstruation	-0.165398	0.289624	0.568862	-0.99369	0.499275	0.0485229	-0.762086	0.521623	0.146259	141	TG	126.255	0.8215	110	420421
icd10-Z97-both_sexes	Z97 Presence of other devices	0.0486726	0.0853326	0.569329	-0.0152409	0.14913	0.918746	0.00255372	0.139484	0.985419	141	TG	144.461	0.4268	1458	419073
icd10-O63-both_sexes	O63 Long labour	-0.0459065	0.0806895	0.570316	0.104014	0.140366	0.459933	-0.020783	0.119569	0.862261	141	TG	159.17	0.1618	1941	418590
phecode-853-both_sexes	Complication of colostomy or enterostomy	-0.0788549	0.138717	0.570636	0.072467	0.242367	0.765388	-0.000626288	0.212032	0.997647	141	TG	162.217	0.122	624	390518
icd10-Z58-both_sexes	Z58 Problems related to physical environment	0.118936	0.209653	0.57142	-0.124386	0.366042	0.734509	0.21238	0.375914	0.572998	141	TG	116.096	0.9489	194	420337
icd10-R10-both_sexes	R10 Abdominal and pelvic pain	0.0117125	0.0207029	0.572475	-0.0507169	0.0356597	0.157195	0.00442576	0.0313083	0.887788	141	TG	182.936	0.0125	35907	384624
phecode-252-both_sexes	Disorders of parathyroid gland	-0.0629085	0.111289	0.572793	0.0909943	0.194088	0.639925	0.0112446	0.163791	0.945364	141	TG	197.746	0.0011	1172	415877
icd10-A08-both_sexes	A08 Viral and other specified intestinal infections	0.0468229	0.0830111	0.573619	0.0305433	0.145381	0.833904	-0.00896125	0.154177	0.953733	141	TG	103.362	0.9942	1107	419424
categorical-20002-both_sexes-1242	Non-cancer illness code, self-reported	-0.0293246	0.0521517	0.574815	-0.132479	0.0906503	0.146156	-0.0791789	0.0946919	0.404482	141	TG	121.544	0.8933	3318	417155
phecode-961.1-both_sexes	Poisoning/allergy of sulfonamides	-0.0631697	0.112656	0.575879	-0.152648	0.196832	0.439346	0.0307524	0.167214	0.85435	141	TG	180.813	0.0159	1053	383239
phecode-276.5-both_sexes	Hypovolemia	-0.0307886	0.0550362	0.576766	0.044888	0.0960181	0.640878	0.0185071	0.0857174	0.829373	141	TG	166.678	0.0821	4134	409482
categorical-20002-both_sexes-1523	Non-cancer illness code, self-reported	0.148376	0.266185	0.578133	-0.460573	0.461136	0.319636	0.495461	0.426094	0.246889	141	TG	166.369	0.084	172	420301
categorical-20002-both_sexes-1585	Non-cancer illness code, self-reported	0.151796	0.272925	0.578973	0.218308	0.476656	0.647668	0.110935	0.471754	0.814433	141	TG	114.574	0.9578	113	420360
phecode-687-both_sexes	Symptoms affecting skin	0.0386097	0.0696512	0.580239	0.0862179	0.121827	0.480313	0.0866105	0.096064	0.368822	141	TG	216.516	0.0001	3307	411745
icd10-M67-both_sexes	M67 Other disorders of synovium and tendon	-0.0277598	0.0501341	0.580659	0.124753	0.0863027	0.150561	-0.00926412	0.0834409	0.911755	141	TG	147.4	0.3667	4371	416160
categorical-20002-both_sexes-1156	Non-cancer illness code, self-reported	0.0718819	0.129914	0.580938	-0.0323198	0.227118	0.887046	0.132591	0.186993	0.479459	141	TG	202.446	0.0004	882	419591
phecode-741.1-both_sexes	Ankylosis of joint	-0.184703	0.334007	0.581151	0.828682	0.575333	0.152016	-0.228803	0.477703	0.632711	141	TG	164.921	0.0953	109	413456
phecode-723.1-both_sexes	Torticollis	0.147551	0.267303	0.581829	-0.133031	0.467243	0.776287	0.0968683	0.464276	0.83503	141	TG	134.373	0.6599	138	401917
categorical-20002-both_sexes-1457	Non-cancer illness code, self-reported	0.0529159	0.0960658	0.582628	-0.0283051	0.168144	0.866562	-0.0908602	0.130504	0.487443	141	TG	211.205	0.0001	1709	418764
categorical-20002-both_sexes-1078	Non-cancer illness code, self-reported	0.0378003	0.06868	0.582934	0.0423897	0.120196	0.724868	0.134918	0.106997	0.209425	141	TG	182.642	0.0129	2866	417607
categorical-20001-both_sexes-1018	Cancer code, self-reported	0.160432	0.2918	0.583331	0.517871	0.509414	0.311109	0.386633	0.431309	0.371569	141	TG	179.107	0.0198	155	420318
phecode-426.21-both_sexes	First degree AV block	-0.0471559	0.0858274	0.583588	-0.14651	0.149807	0.329777	-0.143199	0.134982	0.290575	141	TG	149.901	0.3177	1530	384657
phecode-374.1-both_sexes	Ectropion or entropion	0.0528467	0.0963963	0.584411	0.444335	0.163798	0.00751742	0.20533	0.147887	0.167212	141	TG	174.412	0.0365	1389	409073
categorical-20002-both_sexes-1608	Non-cancer illness code, self-reported	0.147646	0.269944	0.585283	-0.683953	0.463979	0.142715	-0.195672	0.467028	0.675879	141	TG	121.176	0.8965	122	420351
phecode-008.52-both_sexes	Intestinal infection due to C. difficile	-0.0677527	0.124512	0.587206	-0.348627	0.216047	0.108869	-0.321921	0.181426	0.0781715	141	TG	179.752	0.0178	858	407487
phecode-751.2-both_sexes	Congenital anomalies of urinary system	0.0545779	0.100394	0.587555	0.0100224	0.175679	0.954587	0.10592	0.170055	0.534393	141	TG	139.988	0.5289	1019	417905
categorical-20001-both_sexes-1023	Cancer code, self-reported	0.0974728	0.179732	0.588458	0.281833	0.313975	0.370937	0.398723	0.320859	0.216066	141	TG	133.321	0.6832	301	420172
phecode-800.3-both_sexes	Fracture of tibia and fibula	0.0358413	0.0661085	0.588571	0.151645	0.115177	0.190129	0.142001	0.107816	0.189968	141	TG	144.71	0.4216	2465	395047
icd10-E34-both_sexes	E34 Other endocrine disorders	0.133663	0.246679	0.588784	0.286682	0.431585	0.507628	0.144324	0.388257	0.710661	141	TG	140.639	0.5137	170	420361
icd10-M43-both_sexes	M43 Other deforming dorsopathies	-0.0817905	0.150954	0.588801	0.358884	0.26024	0.170093	0.11301	0.234016	0.62991	141	TG	146.016	0.3936	472	420059
icd10-O24-both_sexes	O24 Diabetes mellitus in pregnancy	-0.0385596	0.0713036	0.589518	0.0242136	0.12465	0.846261	0.0353561	0.102166	0.729814	141	TG	199.182	0.0009	202	420329
icd10-G41-both_sexes	G41 Status epilepticus	0.139735	0.258869	0.590199	0.550554	0.451411	0.22467	-0.27683	0.409072	0.499695	141	TG	157.765	0.1802	171	420360
icd10-F00-both_sexes	F00 Dementia in Alzheimer's disease	0.147147	0.27269	0.590321	0.0697836	0.47732	0.883976	-0.187586	0.225212	0.406302	141	TG	508.865	0.0001	507	420024
icd10-H33-both_sexes	H33 Retinal detachments and breaks	0.0325501	0.0604265	0.590968	0.0342331	0.1057	0.746522	0.140818	0.0897461	0.11889	141	TG	178.315	0.0214	3746	416785
phecode-743.1-both_sexes	Osteoporosis	0.0291313	0.0541199	0.591243	0.28454	0.0909944	0.00215123	0.109396	0.0637703	0.0884709	141	TG	297.743	0.0001	7937	411038
icd10-K05-both_sexes	K05 Gingivitis and periodontal diseases	0.0579296	0.10833	0.593671	-0.0115927	0.189376	0.951276	0.127608	0.16085	0.428924	141	TG	152.943	0.2586	968	419563
phecode-170.1-both_sexes	Bone cancer	0.120535	0.225549	0.593907	0.0204737	0.394726	0.958708	0.07718	0.37033	0.835213	141	TG	119.396	0.9191	172	419977
phecode-446.5-both_sexes	Giant cell arteritis	0.0831583	0.155765	0.594277	0.419298	0.270745	0.123731	0.186284	0.244595	0.447577	141	TG	175.937	0.0296	532	408565
categorical-6148-both_sexes-1	Eye problems/disorders	-0.063265	0.120007	0.598905	-0.437743	0.206336	0.0356539	0.053758	0.109039	0.622774	141	TG	492.102	0.0001	2640	132723
phecode-642.1-females	Preeclampsia and eclampsia	0.0843149	0.160284	0.599696	-0.487983	0.274207	0.0773237	-0.0608555	0.279115	0.827723	141	TG	110.974	0.9771	319	226285
icd10-V78-both_sexes	V78 Bus occupant injured in noncollision transport accident	0.147382	0.281552	0.60148	1.33279	0.478452	0.00608859	0.366035	0.49602	0.461783	141	TG	117.997	0.9316	103	420428
icd10-H69-both_sexes	H69 Other disorders of Eustachian tube	-0.124521	0.238007	0.601675	0.313114	0.414328	0.451099	0.22831	0.364115	0.531662	141	TG	158.108	0.1754	205	420326
phecode-579.2-both_sexes	Splenomegaly	-0.0812075	0.155347	0.601974	0.0166759	0.271815	0.951169	0.0696637	0.251909	0.782539	141	TG	156.145	0.2047	476	390772
icd10-N75-both_sexes	N75 Diseases of Bartholin's gland	0.0712089	0.136718	0.603297	-0.247711	0.236941	0.297628	-0.216573	0.195634	0.270177	141	TG	187.933	0.0067	739	419792
phecode-800.1-both_sexes	Fracture of neck of femur	-0.0403259	0.0775349	0.603816	-0.0602633	0.13576	0.657808	-0.00661678	0.122254	0.956914	141	TG	154.692	0.2282	1943	395047
phecode-361.1-both_sexes	Retinal detachment with retinal defect	0.0313801	0.060536	0.605018	0.04047	0.105891	0.702906	0.128856	0.0886316	0.148229	141	TG	179.127	0.0193	3756	404535
icd10-G54-both_sexes	G54 Nerve root and plexus disorders	-0.0775247	0.150797	0.607992	0.064763	0.263517	0.806227	-0.0856393	0.255207	0.737699	141	TG	136.595	0.6067	440	420091
icd10-K22-both_sexes	K22 Other diseases of oesophagus	-0.0175829	0.0342365	0.608362	-0.0242236	0.05994	0.686737	-0.0173246	0.0467084	0.711265	141	TG	183.886	0.0113	12256	408275
icd10-Z71-both_sexes	Z71 Persons encountering health services for other counselling and medical advice, not elsewhere classified	0.0411938	0.0805589	0.609912	0.123721	0.140712	0.380782	0.034213	0.126792	0.787684	141	TG	137.56	0.5838	1570	418961
icd10-I97-both_sexes	I97 Postprocedural disorders of circulatory system, not elsewhere classified	0.0999225	0.195742	0.610519	0.629382	0.338082	0.064768	0.212159	0.336445	0.529336	141	TG	126.096	0.8244	242	420289
phecode-361-both_sexes	Retinal detachments and defects	0.0308691	0.0608042	0.612476	0.0262267	0.106371	0.805613	0.133497	0.0890302	0.136007	141	TG	182.176	0.0138	3789	404535
categorical-20002-both_sexes-1613	Non-cancer illness code, self-reported	-0.149817	0.296024	0.613584	-0.567473	0.515777	0.273134	-0.369507	0.455206	0.418321	141	TG	161.315	0.1328	135	420338
phecode-371.1-both_sexes	Uveitis, noninfectious or NOS	0.0679529	0.134484	0.614152	0.0640144	0.235368	0.786044	-0.263843	0.207855	0.206418	141	TG	145.52	0.4053	592	409073
phecode-742.9-both_sexes	Other derangement of joint	-0.0313686	0.0621135	0.614339	-0.0244707	0.108707	0.822227	0.0327751	0.0950099	0.730638	141	TG	151.129	0.2965	2921	413456
phecode-743.11-both_sexes	Osteoporosis NOS	0.0273067	0.054134	0.614754	0.284597	0.0909626	0.00213946	0.107667	0.0664349	0.107346	141	TG	297.455	0.0001	7930	411038
phecode-134-both_sexes	Helminthiases	0.131905	0.261696	0.615027	-0.256802	0.456668	0.574791	0.0814916	0.390901	0.835164	141	TG	166.306	0.0839	179	419830
icd10-T92-both_sexes	T92 Sequelae of injuries of upper limb	-0.0531431	0.105442	0.615052	-0.303799	0.182735	0.0986639	-0.0946782	0.185189	0.60998	141	TG	124.526	0.847	823	419708
icd10-Y84-both_sexes	Y84 Other medical procedures as the cause of abnormal reaction of the patient, or of later complication, without mention of misadventure at the time of the procedure	0.0304816	0.0605357	0.615383	-0.207565	0.103081	0.0459806	0.00379383	0.0942624	0.967953	141	TG	144.816	0.4192	2923	417608
phecode-446-both_sexes	Polyarteritis nodosa and allied conditions	0.0599823	0.119169	0.615517	0.387626	0.205989	0.0619564	0.00380934	0.162671	0.981351	141	TG	202.467	0.0005	1051	408565
phecode-573.3-both_sexes	Hepatomegaly	-0.0536984	0.106952	0.6164	0.0587322	0.186877	0.753777	-0.00277751	0.186687	0.988151	141	TG	126.363	0.819	818	408402
categorical-20002-both_sexes-1562	Non-cancer illness code, self-reported	-0.122095	0.243532	0.616912	0.296715	0.423438	0.484644	-0.0320132	0.42488	0.940047	141	TG	129.228	0.7673	160	420313
phecode-710-both_sexes	Osteomyelitis, periostitis, and other infections involving bone	-0.0595679	0.118966	0.617359	0.156216	0.20706	0.451855	-0.071115	0.188681	0.706814	141	TG	150.318	0.311	787	372332
phecode-531.4-both_sexes	Peptic ulcer, site unspecified	0.0739295	0.147844	0.617824	-0.205168	0.25769	0.427284	-0.0281266	0.233745	0.904394	141	TG	147.267	0.3702	502	411516
icd10-V49-both_sexes	V49 Car occupant injured in other and unspecified transport accidents	0.096826	0.193776	0.618084	0.14158	0.339423	0.677235	-0.0596683	0.312579	0.848888	141	TG	136.871	0.5994	269	420262
categorical-20002-both_sexes-1258	Non-cancer illness code, self-reported	0.120847	0.241944	0.618223	0.857464	0.416551	0.0414114	0.432365	0.42766	0.313759	141	TG	117.697	0.9347	148	420325
phecode-523.3-both_sexes	Periodontitis (acute or chronic)	-0.0431294	0.0864523	0.618647	-0.147425	0.150903	0.330291	-0.044845	0.141571	0.751893	141	TG	144.061	0.4354	1418	408157
phecode-729.3-both_sexes	Panniculitis	-0.136667	0.274718	0.619629	0.944476	0.46753	0.0452901	0.356729	0.461321	0.440661	141	TG	149.101	0.3345	144	386932
phecode-362.31-both_sexes	Separation of retinal layers	-0.153806	0.309226	0.619693	-0.115641	0.540961	0.83104	0.418871	0.473109	0.377482	141	TG	156.19	0.2035	120	404535
icd10-C76-both_sexes	C76 Malignant neoplasm of other and ill-defined sites	-0.148008	0.297639	0.619776	0.336581	0.519036	0.517748	0.0140812	0.416349	0.973068	141	TG	181.424	0.0148	151	420380
phecode-430.2-both_sexes	Intracerebral hemorrhage	0.0595263	0.120104	0.620936	-0.29252	0.207079	0.160008	-0.147489	0.166907	0.378393	141	TG	200.721	0.0007	1027	407633
phecode-627.1-females	Postmenopausal bleeding	0.0187229	0.0378574	0.621683	-0.0477076	0.0659088	0.470379	0.000512805	0.0515271	0.992074	141	TG	182.658	0.0127	9944	194287
icd10-N95-both_sexes	N95 Menopausal and other perimenopausal disorders	0.0178096	0.0360397	0.621963	-0.00543813	0.0630237	0.931362	-0.0530374	0.0487659	0.278644	141	TG	186.343	0.0094	11202	409329
phecode-381.3-both_sexes	Mastoiditis & related conditions	-0.10147	0.205386	0.622048	-0.109754	0.35989	0.76085	0.003092	0.366584	0.993282	141	TG	113.301	0.9649	196	416007
phecode-226-both_sexes	Benign neoplasm of thyroid glands	-0.101511	0.206663	0.624062	0.139134	0.361183	0.700665	0.252484	0.290282	0.385904	141	TG	185.629	0.0101	320	418625
categorical-6150-both_sexes-3	Vascular/heart problems diagnosed by doctor	0.0203817	0.0415184	0.62426	-0.0458634	0.072371	0.527301	-0.0334973	0.0660449	0.612819	141	TG	145.814	0.3969	6454	413170
phecode-609-males	Male infertility and abnormal spermatozoa	0.107647	0.220152	0.625631	-0.126298	0.38538	0.743614	0.260407	0.326615	0.426633	141	TG	158.462	0.1707	242	169119
phecode-689-both_sexes	Disorder of skin and subcutaneous tissue NOS	-0.0192578	0.0393969	0.625737	0.0831626	0.0681509	0.224429	0.0149009	0.0601977	0.804859	141	TG	149.51	0.3257	7258	413273
phecode-750.22-both_sexes	Congenital anomaly of gallbladder, bile ducts, liver, pancreas	-0.155435	0.320321	0.628259	-0.626469	0.558431	0.263866	0.0654161	0.458805	0.886827	141	TG	192.134	0.0032	137	417905
icd10-L51-both_sexes	L51 Erythema multiforme	-0.151036	0.312065	0.62915	0.812434	0.537512	0.132939	0.37742	0.503883	0.4551	141	TG	136.614	0.6063	103	420428
phecode-379.4-both_sexes	Anomalies of pupillary function	-0.133105	0.275217	0.629398	-0.515389	0.479679	0.284485	-0.428451	0.506334	0.398894	141	TG	113.021	0.9671	109	410363
icd10-C53-both_sexes	C53 Malignant neoplasm of cervix uteri	-0.0862383	0.17965	0.631951	0.117036	0.313655	0.709615	-0.118755	0.307314	0.699766	141	TG	120.776	0.9017	273	420258
phecode-694.2-both_sexes	Other dyschromia	0.0461715	0.0964679	0.632955	0.472218	0.162919	0.00435866	0.270636	0.161645	0.0963111	141	TG	121.205	0.8966	959	412638
categorical-20002-both_sexes-1647	Non-cancer illness code, self-reported	0.116818	0.244157	0.633074	-0.0782569	0.426659	0.854738	0.147787	0.396436	0.709868	141	TG	136.634	0.6058	167	420306
icd10-Z00-both_sexes	Z00 General examination and investigation of persons without complaint or reported diagnosis	0.0557108	0.116692	0.63381	0.348185	0.202209	0.087311	0.146223	0.172872	0.399083	141	TG	165.514	0.0906	906	419625
icd10-N76-both_sexes	N76 Other inflammation of vagina and vulva	0.0582152	0.121939	0.633813	0.296259	0.211992	0.16449	0.351481	0.184597	0.0589554	141	TG	173.186	0.0404	857	419674
phecode-433.31-both_sexes	Transient cerebral ischemia	0.0367297	0.0769932	0.634069	0.123831	0.134541	0.35896	0.0312771	0.106278	0.768968	141	TG	208.791	0.0001	2611	407633
icd10-M35-both_sexes	M35 Other systemic involvement of connective tissue	-0.0540288	0.113276	0.63413	0.443177	0.191424	0.0220683	0.294844	0.105161	0.00576894	141	TG	456.903	0.0001	2668	417863
icd10-Y43-both_sexes	Y43 Primarily systemic agents	-0.029886	0.0629127	0.6355	0.0764183	0.109536	0.486557	0.0379681	0.0946879	0.689045	141	TG	162.681	0.1169	3054	417477
icd10-D39-both_sexes	D39 Neoplasm of uncertain or unknown behaviour of female genital organs	0.109643	0.231568	0.636607	0.547823	0.402561	0.175765	0.127505	0.357049	0.721549	141	TG	150.367	0.3093	206	420325
phecode-081-both_sexes	Infection/inflammation of internal prosthetic device; implant; and graft	-0.0451904	0.0955043	0.636824	0.154034	0.166003	0.355069	0.123901	0.149197	0.407697	141	TG	150.689	0.3035	1221	414252
phecode-568.1-both_sexes	Peritoneal adhesions (postoperative) (postinfection)	-0.0232487	0.0491931	0.637233	-0.0775213	0.0859298	0.36854	-0.0336711	0.082038	0.682115	141	TG	137.613	0.5831	4268	383086
icd10-C69-both_sexes	C69 Malignant neoplasm of eye and adnexa	-0.101706	0.215209	0.63724	-0.00184088	0.376911	0.99611	-0.0735094	0.350456	0.834165	141	TG	129.322	0.7647	206	420325
phecode-285-both_sexes	Other anemias	-0.0218112	0.0461931	0.637537	0.0540486	0.0804617	0.50287	0.0697935	0.0439842	0.114817	141	TG	416.33	0.0001	15398	396365
icd10-C57-both_sexes	C57 Malignant neoplasm of other and unspecified female genital organs	0.144377	0.305861	0.637636	0.779018	0.531371	0.144893	0.257685	0.467852	0.58266	141	TG	149.303	0.3302	116	420415
phecode-211-both_sexes	Benign neoplasm of other parts of digestive system	0.0238762	0.0506157	0.637864	-0.106656	0.0875519	0.22521	-0.0410431	0.0658369	0.534032	141	TG	246.271	0.0001	7321	402519
icd10-H72-both_sexes	H72 Perforation of tympanic membrane	-0.0453749	0.0965244	0.639024	-0.129987	0.16876	0.442459	-0.082384	0.15972	0.606806	141	TG	136.146	0.6183	1086	419445
icd10-Z41-both_sexes	Z41 Procedures for purposes other than remedying health state	0.0479552	0.102417	0.640347	0.0150374	0.179344	0.933299	0.106886	0.178364	0.54997	141	TG	118.304	0.9291	833	419698
phecode-287.32-both_sexes	Secondary thrombocytopenia	-0.158287	0.33841	0.640701	0.182999	0.590752	0.757198	-0.374302	0.545377	0.493648	141	TG	171.268	0.0521	108	416975
icd10-N77-both_sexes	N77 Vulvovaginal ulceration and inflammation in diseases classified elsewhere	0.0895338	0.191467	0.640784	-0.302801	0.332714	0.364349	-0.179605	0.30913	0.562174	141	TG	127.732	0.7961	257	420274
phecode-276.14-both_sexes	Hypopotassemia	0.035087	0.0751042	0.641099	0.0108202	0.131453	0.934517	0.0779615	0.113217	0.492212	141	TG	170.776	0.0547	2259	409482
icd10-S22-both_sexes	S22 Fracture of rib(s), sternum and thoracic spine	-0.0728315	0.156203	0.641752	-0.24947	0.272875	0.36218	-0.0166344	0.25612	0.948308	141	TG	138.049	0.5737	418	420113
phecode-663-females	Umbilical cord complications during labor and delivery	-0.059763	0.128241	0.641924	-0.178806	0.224106	0.426312	-0.0408876	0.212511	0.847706	141	TG	139.358	0.5428	636	219193
phecode-626.11-females	Absent or infrequent menstruation	0.126376	0.27143	0.64223	-0.43958	0.471972	0.353278	0.0458333	0.445624	0.918228	141	TG	147.475	0.365	147	194287
icd10-H16-both_sexes	H16 Keratitis	-0.0851373	0.183037	0.642556	-0.16919	0.32023	0.598106	-0.0747899	0.28825	0.79566	141	TG	148	0.3541	324	420207
phecode-250.21-both_sexes	Type 2 diabetes with ketoacidosis	0.139455	0.300539	0.643356	0.607703	0.524374	0.248479	0.0527542	0.426375	0.901709	141	TG	196.007	0.0017	160	396181
phecode-378.1-both_sexes	Strabismus (not specified as paralytic)	-0.0449408	0.0969293	0.643622	0.114725	0.168927	0.49818	0.0218874	0.164157	0.894122	141	TG	134.963	0.6444	1063	410363
icd10-D44-both_sexes	D44 Neoplasm of uncertain or unknown behaviour of endocrine glands	0.105953	0.228616	0.643759	0.054005	0.40006	0.892813	0.241214	0.343346	0.48351	141	TG	156.275	0.2014	220	420311
phecode-687.4-both_sexes	Disturbance of skin sensation	-0.0287926	0.062369	0.64505	-0.00353888	0.109172	0.974187	0.011367	0.0893513	0.898951	141	TG	183.161	0.0118	3497	411745
phecode-750.1-both_sexes	Upper gastrointestinal congenital anomalies	-0.0622146	0.134801	0.645136	-0.377944	0.233781	0.108219	-0.0249975	0.239626	0.917066	141	TG	104.88	0.9927	426	417905
phecode-915-both_sexes	Superficial injury without mention of infection	0.0209197	0.045328	0.645143	0.052568	0.079325	0.508626	0.0256083	0.0678702	0.706512	141	TG	172.35	0.0449	6398	413230
phecode-291-both_sexes	Other specified nonpsychotic and/or transient mental disorders	0.0400843	0.0871484	0.646262	0.0907855	0.15255	0.55273	0.0468524	0.14985	0.755003	141	TG	124.993	0.8403	1226	410833
icd10-R16-both_sexes	R16 Hepatomegaly and splenomegaly, not elsewhere classified	-0.0490019	0.106779	0.647009	0.0656152	0.186555	0.725581	0.0306984	0.187398	0.870114	141	TG	125.638	0.8314	816	419715
phecode-324-both_sexes	Other CNS infection and poliomyelitis	-0.0783903	0.171085	0.647522	0.386214	0.295471	0.193332	0.145441	0.249416	0.560747	141	TG	151.761	0.2831	382	419234
phecode-800.2-both_sexes	Fracture of unspecified part of femur	-0.0290447	0.0635006	0.648098	-0.115255	0.110827	0.300165	0.00781129	0.0978246	0.936471	141	TG	158.377	0.1717	2977	395047
icd10-V43-both_sexes	V43 Car occupant injured in collision with car, pick-up truck or van	-0.0563281	0.123441	0.648869	0.226368	0.214078	0.292161	0.0155005	0.198856	0.93798	141	TG	148.102	0.3525	718	419813
phecode-362.8-both_sexes	Retinal hemorrhage/ischemia	-0.115225	0.252634	0.649028	-0.333654	0.441403	0.450991	0.308681	0.408835	0.451502	141	TG	128.596	0.7798	144	404535
phecode-686.1-both_sexes	Carbuncle and furuncle	0.0312124	0.068553	0.649596	0.0312525	0.11999	0.794895	0.0369942	0.103395	0.721035	141	TG	170.417	0.057	2705	406937
icd10-X40-both_sexes	X40 Accidental poisoning by and exposure to nonopioid analgesics, antipyretics and antirheumatics	-0.0749949	0.165405	0.650961	-0.265428	0.289194	0.360302	-0.173875	0.281493	0.537783	141	TG	129.529	0.7602	347	420184
phecode-681.1-both_sexes	Cellulitis and abscess of fingers/toes	-0.0601461	0.133407	0.652799	0.108596	0.232941	0.641806	-0.0746717	0.198343	0.707132	141	TG	166.711	0.0814	690	406937
phecode-809-both_sexes	Fracture of unspecified bones	-0.0688161	0.153172	0.653929	-0.237594	0.268262	0.377321	-0.0931133	0.254191	0.714685	141	TG	152.894	0.2605	482	395047
phecode-250-both_sexes	Diabetes mellitus	-0.0283088	0.0630437	0.654101	-0.296601	0.106772	0.00622753	0.0392786	0.0464934	0.399653	141	TG	1071.8	0.0001	24348	396181
[truncated: 601 more rows]
