# Supplementary material for: Phenome-wide Mendelian randomization study of plasma triglyceride levels and 2600 disease traits
Source: eLife. 2023 Mar 29;12:e80560. doi: 10.7554/eLife.80560 (PMC10079290; doi:10.7554/eLife.80560)
Supplement: Supplementary file 2. — Shown are the estimates, standard deviations, and p-values of MR results using IVW, MR-Egger, and weighted median methods. 1248 SNPs were used as instrumental variables to proxy plasma TG levels. A Bonferroni threshold for statistical significance was set to p<0.05/221=2.26 × 10–4 for this replication analysis. [file elife-80560-supp2.xlsx]

## Sheet: Supplementary File 2
Outcome	Description	IVW_Estimate	IVW_Sd	IVW_Pvalue	MRegger_Estimate	MRegger_Sd	MRegger_Pvalue	Median_Estimate	Median_Sd	Median_Pvalue	nsnp	mrpresso_GlobalTest_RSSobs	mrpresso_GlobalTest_Pvalue
R4_E4_LIPOPROT	Disorders of lipoprotein metabolism and other lipidaemias	0.365604	0.0239073	1.62107e-48	0.369819	0.0404425	2.37437e-19	0.386874	0.0348044	1.95049e-27	1248	2036.5	<1e-04
R4_I9_ANGINA	Angina pectoris	0.264824	0.0242241	1.24966e-26	0.213181	0.0409327	2.23034e-07	0.25856	0.0351184	3.26722e-13	1248	2035.07	<1e-04
R4_I9_IHD	Ischaemic heart disease, wide definition	0.216967	0.0202648	1.18651e-25	0.184605	0.0342578	8.47958e-08	0.230919	0.0283221	8.55049e-16	1248	2248.22	<1e-04
R4_E4_HYPERLIPNAS	Hyperlipidaemia, other/unspecified	0.362328	0.0340436	2.22041e-25	0.412412	0.057567	1.33681e-12	0.393091	0.0539672	5.73168e-13	1248	1525.36	<1e-04
R4_I9_CORATHER	Coronary atherosclerosis	0.231443	0.0231247	9.81799e-23	0.189853	0.0390858	1.34084e-06	0.237691	0.031591	1.01313e-13	1248	2189.96	<1e-04
R4_I9_HYPTENS	Hypertension	0.160457	0.0173477	9.49016e-20	0.120531	0.0293111	4.17745e-05	0.129923	0.0234495	3.67499e-08	1248	2411.36	<1e-04
R4_I9_UAP	Unstable angina pectoris	0.269081	0.0327391	5.09618e-16	0.256031	0.0553855	4.18177e-06	0.27459	0.0509705	8.5464e-08	1248	1699.92	<1e-04
R4_Z21_PRESENCE_CARDIAC_VASCULAR_IMPLANTNTS_GRAFTS	Presence of cardiac and vascular implants and grafts	0.208281	0.028132	2.42919e-13	0.145395	0.0475406	0.00227321	0.253744	0.0444574	1.43067e-08	1248	1530.75	<1e-04
R4_I9_MI	Myocardial infarction	0.19029	0.0262527	7.37503e-13	0.186789	0.0443914	2.76389e-05	0.215931	0.0396728	6.30971e-08	1248	1752.93	<1e-04
R4_I9_AORTANEUR	Aortic aneurysm	0.296604	0.045111	7.13784e-11	0.373116	0.0762397	1.11753e-06	0.364171	0.0717084	4.38322e-07	1248	1413.48	0.0007
R4_N14_MESNRUIRREG	Excessive, freguent and irrelgular menstruation	0.119822	0.0190381	4.28171e-10	0.0583306	0.0321334	0.0697236	0.0725001	0.0309179	0.0191873	1248	1415.27	0.0004
R4_I9_CARDARR	Cardiac arrest	0.337299	0.068335	9.05575e-07	0.185243	0.115438	0.108813	0.259725	0.115768	0.0250395	1248	1299.41	0.1588
R4_ALCOLIVER	Alcoholic liver disease	-0.261105	0.054938	2.24008e-06	-0.418234	0.0927823	7.17e-06	-0.255327	0.093689	0.0065149	1248	1239.46	0.5686
R4_R18_PAIN_THROAT_CHEST	Pain in throat and chest	0.0734931	0.0157146	3.2322e-06	0.0364496	0.02656	0.170201	0.0715957	0.0255965	0.00523586	1248	1392.44	0.0023
R4_K11_DIVERTIC	Diverticular disease of intestine	0.10083	0.0219271	4.68991e-06	0.0493124	0.0370464	0.1834	0.0968829	0.0316015	0.00221781	1248	1630.2	<1e-04
R4_R18_HAEMORRHAGE_RESPI_PASSA	Haemorrhage from respiratory passages	0.138735	0.0309291	7.94122e-06	0.0843781	0.0522848	0.106821	0.153409	0.0516951	0.00305895	1248	1447.15	0.0001
R4_I9_POSTAMI	Status post-ami	0.250627	0.0605029	3.66837e-05	0.221597	0.102266	0.0304337	0.344308	0.101319	0.000699615	1248	1446.03	0.0001
R4_E4_HYPOPIT	Hypopituitarism	0.269259	0.0676879	7.35127e-05	0.337035	0.114516	0.00330943	0.235332	0.115082	0.0410729	1248	1217.38	0.7318
R4_I9_ATHSCLE	Atherosclerosis, excluding cerebral, coronary and PAD	0.127929	0.0331651	0.000120489	0.160712	0.0561162	0.00425449	0.217761	0.0493172	1.09494e-05	1248	1820.32	<1e-04
R4_I9_PAD	Peripheral artery disease	0.111529	0.0316888	0.000447897	0.14916	0.0536069	0.00547592	0.225891	0.0486465	3.78773e-06	1248	1798.8	<1e-04
R4_I9_PAROXTAC	Paroxysmal tachycardia	0.108426	0.0311683	0.000521138	0.0786433	0.05274	0.136175	0.137775	0.054476	0.0115579	1248	1266.07	0.3648
R4_N14_CALCUKIDUR	Calculus of kidney and ureter	0.119242	0.0344601	0.000557833	0.0915406	0.0582624	0.116395	0.0281747	0.0535154	0.59865	1248	1656.93	<1e-04
R4_E4_MINERAL_MET	Disorders of mineral metabolism	0.229968	0.0697637	0.00100694	0.159614	0.117954	0.176243	0.217445	0.119726	0.0695823	1248	1287.36	0.22
R4_N14_POLYPFEMGEN	Polyp of the female genital tract	0.0883846	0.0269691	0.0010771	0.012449	0.0455427	0.784632	0.086228	0.0437355	0.0488782	1248	1472.22	<1e-04
R4_N14_FEMGENPAIN	Pain and other conditions associated with female genital organs and menstrual cycle	0.117898	0.0360461	0.00110189	-0.0143515	0.0608055	0.813454	0.0627706	0.0633092	0.321638	1248	1184.75	0.9049
R4_K11_DISLIVOTH	Other diseases of liver	0.149263	0.0464506	0.00134548	0.00767648	0.0784319	0.922048	0.158202	0.0773226	0.0409656	1248	1445.09	0.0001
R4_Z21_PERSONAL_HISTORY_RISK__NOT_ELSEW_CLASSIFIED	Personal history of risk-factors, not elsewhere classified	-0.48346	0.152257	0.00153352	-0.616385	0.257593	0.0168646	-0.468518	0.263708	0.075869	1248	1220.86	0.7066
R4_M13_GOUT	Gout	0.124116	0.0391389	0.00155529	0.0356154	0.0661256	0.590258	0.132498	0.0655665	0.0435116	1248	1367.14	0.0104
R4_CHRONHEP_NAS	Chronic hepatitis NAS	-0.435808	0.137888	0.00161231	-0.308003	0.233316	0.187042	-0.400681	0.236841	0.0909393	1248	1199.15	0.8391
R4_N14_OTHPENIS	Other disorders of penis	0.180532	0.057553	0.00174798	0.277502	0.0972371	0.00439046	0.239613	0.0986689	0.0153039	1248	1265.55	0.3685
R4_E4_CA_MET	Disorders of calcium metabolism	0.251619	0.0804063	0.00179261	0.124872	0.135942	0.358498	0.122304	0.140483	0.38414	1248	1277.61	0.2828
R4_K11_ACUTPANC	Acute pancreatitis	0.119009	0.03862	0.00210447	0.0168445	0.0652194	0.796238	0.125726	0.0641475	0.0502249	1248	1280.89	0.261
R4_ST19_EARLY_COMPLICATIO_TRAUMA	Early complications of trauma	0.269763	0.0901888	0.00283444	0.09418	0.152441	0.536812	0.275865	0.15573	0.0767324	1248	1209.64	0.781
R4_I9_THROMBOTH	Other embolism and thrombosis	-0.151548	0.0507309	0.00286969	-0.308359	0.0856753	0.000331781	-0.179126	0.0828138	0.0307308	1248	1419.8	0.0003
R4_N14_OVARYCYST	Ovarian cyst	0.0666321	0.0223718	0.0029536	0.0316214	0.0378334	0.403424	0.0895549	0.0363277	0.0138278	1248	1336.82	0.0423
R4_R18_UNSPE_URINARY_INCONTINENCE	Unspecified urinary incontinence	0.17826	0.0601185	0.0030829	0.261512	0.101628	0.0101906	0.16104	0.101574	0.113119	1248	1427.19	0.0003
R4_K11_PERITONITIS	Acute peritonitis	0.209049	0.0707926	0.00320616	0.0780046	0.119676	0.514653	0.147158	0.115659	0.203489	1248	1295.5	0.1759
R4_N14_URETHRAOTH	Other disorders of urethra and urinary system	0.0533022	0.0181084	0.00330524	0.0187342	0.0306177	0.540732	0.0455695	0.0307114	0.138115	1248	1290.72	0.2006
R4_CD2_BENIGN_LEIOMYOMA_UTERI	Leiomyoma of uterus	0.0600524	0.0205905	0.00360305	0.0910406	0.0348351	0.00907069	0.0399839	0.0323437	0.21661	1248	1713.58	<1e-04
R4_R18_OTHER_ABNORMAL_FINDI_BLOOD_CHEMIS	Other abnormal findings of blood chemistry	0.335108	0.114967	0.00362242	0.332288	0.194606	0.0879797	0.41578	0.192817	0.0312476	1248	1242.98	0.54
R4_I9_CARDMYOOTH	Cardiomyopathy, other and unspecified	0.169192	0.0589993	0.0042044	0.0102076	0.0995501	0.918347	-0.0133417	0.103623	0.897574	1248	1248.18	0.4982
R4_I9_PHLETHROM	Phlebitis and thrombophlebitis (not including DVT)	-0.112868	0.0396393	0.00448036	-0.0928517	0.0670406	0.166298	-0.069727	0.0651807	0.28494	1248	1479.55	<1e-04
R4_F5_PERSONALITY	Specific personality disorders	0.092577	0.0325537	0.00453029	0.130899	0.0550329	0.0175301	0.119966	0.0523159	0.0220081	1248	1446.66	0.0001
R4_D3_COMBIMMUDEF	Combined immunodeficiencies	0.438493	0.156077	0.00503976	0.430555	0.264131	0.103337	0.476461	0.267656	0.0752988	1248	1315.01	0.0961
R4_E4_THYTOXGOITDIF	Thyrotoxicosis with diffuse goiter	-0.162861	0.059089	0.00593295	-0.218749	0.0999545	0.0288194	-0.00149693	0.0751912	0.98412	1248	2252	<1e-04
R4_I9_VASCSYND	Vascular syndromes of brain in cerebrovascular disorders	0.212026	0.079853	0.0080269	-0.0180862	0.134875	0.893348	0.17157	0.139687	0.219587	1248	1128.43	0.9932
R4_CD2_INSITU_BREAST	Carcinoma in situ of breast	0.157057	0.06398	0.0142329	0.220946	0.108281	0.0415122	0.199644	0.111981	0.0748559	1248	1208.83	0.7854
R4_I9_CARDMYO	Cardiomyopathy	0.0991257	0.040426	0.0143417	0.111386	0.0683481	0.103422	0.159526	0.0707942	0.0244082	1248	1348.46	0.024
R4_K11_GIBLEEDING	GI-bleeding	0.0739504	0.0304971	0.0154567	0.0062263	0.051529	0.903844	0.0158198	0.0516428	0.759403	1248	1300.66	0.1499
R4_I9_HYPTENSHR	Hypertensive heart and/or renal disease	0.0844339	0.034915	0.015737	0.0431717	0.0590309	0.464709	0.122527	0.0569126	0.0315187	1248	1463.43	<1e-04
R4_L12_LUPUS	Lupus erythematosus	-0.274676	0.114261	0.0163651	-0.251458	0.19324	0.193405	-0.181644	0.189933	0.339075	1248	1286.62	0.2241
R4_K11_OTHGASTR	Other gastritis (incl. Duodenitis)	0.0791869	0.0333094	0.0175894	0.15143	0.0562923	0.00723915	0.128921	0.0570104	0.0239086	1248	1285.97	0.2263
R4_R18_SYNCO_COLLAP	Syncope and collapse	0.0557242	0.0237994	0.0193677	0.0410133	0.0402534	0.308458	0.0751157	0.0381253	0.0490329	1248	1312.27	0.1034
R4_K11_OTHFUNC	Other functional intestinal disroders	0.0559659	0.0239719	0.0197199	0.0625473	0.0405424	0.123142	0.0641271	0.0402888	0.111709	1248	1215.37	0.7455
R4_E4_ENDOMETPOSTOP	Postprocedural endocrine and metabolic disorders, not elsewhere classified	0.137019	0.0591387	0.0206703	0.209936	0.100034	0.0360482	0.100424	0.0956621	0.294021	1248	1431.37	0.0003
R4_E4_METABO	Other metabolic disorders	0.130193	0.0566384	0.0216889	0.201591	0.0957811	0.0355169	0.0724559	0.091258	0.427365	1248	1434.44	0.0003
R4_K11_OTHDISDIG	Other diseases of the digestive system	0.0698533	0.0304411	0.0219157	0.0161829	0.0514494	0.753163	0.0376593	0.0502298	0.453553	1248	1272	0.3202
R4_K11_OTHENTERCOL	Other noninfective gastroenteritis and colitis	-0.0794293	0.0347087	0.0222777	-0.0643042	0.0587181	0.27367	-0.0699891	0.0558431	0.210325	1248	1320.54	0.0792
R4_I9_OTHANEUR	Other aneurysm	0.191455	0.0856447	0.0255637	0.00971598	0.144794	0.946511	0.183225	0.147516	0.214445	1248	1279.26	0.2707
R4_I9_HYPTENSHD	Hypertensive Heart Disease	0.0823162	0.0370559	0.0265024	0.0344274	0.0626538	0.58277	0.137563	0.0604826	0.0231098	1248	1447.29	0.0001
R4_D3_THROMBOCYTOPENIANAS	Thrombocytopenia, unspecified	0.164393	0.0749516	0.0284685	0.212109	0.126764	0.0945283	0.233696	0.124482	0.0607033	1248	1318.73	0.0839
R4_K11_BILIAOTH	Other diseases of biliary tract	0.141792	0.0646907	0.0285748	0.0688392	0.109353	0.529128	0.0351452	0.112857	0.755538	1248	1196.32	0.8547
R4_J10_CHRONSINUSITIS	Chronic sinusitis	-0.0557668	0.0258308	0.031046	-0.0575103	0.0437125	0.188534	-0.0541994	0.0406452	0.18262	1248	1548.6	<1e-04
R4_CD2_INSITU_MELANOMA	Melanoma in situ	0.233756	0.108744	0.0317786	0.526618	0.183657	0.00420835	0.336716	0.184449	0.0681605	1248	1350.5	0.0221
R4_K11_CHOLELITH	Cholelithiasis	0.0484213	0.0226473	0.0327061	-0.0710656	0.0380885	0.0623041	0.0062772	0.031869	0.843884	1248	2296.28	<1e-04
R4_K11_CHRONHEP	Chronic hepatitis, not elsewhere classified	-0.204869	0.097052	0.0349781	-0.154393	0.164239	0.347374	-0.0447073	0.153857	0.771423	1248	1349.5	0.0233
R4_K11_GALLBLAOTH	Other diseases of gallbladder	-0.167158	0.07945	0.0355834	-0.318548	0.134307	0.0178536	-0.199487	0.134664	0.138762	1248	1210.53	0.7766
R4_C3_SECONDARY_NAS	Secondary malignant neoplasm of other and unspecified sites	-0.323784	0.153997	0.0357064	-0.644696	0.260295	0.0133889	-0.531274	0.280379	0.058344	1248	1151.63	0.9767
R4_I9_OTHARR	Other arrhytmias	0.0410197	0.0202445	0.0429551	0.0150609	0.0342284	0.660004	0.0372764	0.0343108	0.277497	1248	1334.33	0.0468
R4_O15_DELIV_SPONT	Single spontaneous delivery	0.0268429	0.0133548	0.0446476	0.0097619	0.0225914	0.665739	0.0181629	0.0238487	0.446449	1248	1236.21	0.5942
R4_I9_ENDOCARD	Endocarditis	0.198612	0.101161	0.0498305	0.099934	0.170914	0.558854	0.124347	0.167513	0.458037	1248	1248.03	0.4993
R4_N14_SALPHOOPH	Salphingitis and oophoritis	0.0729998	0.0373992	0.0511728	0.15248	0.0632554	0.0160728	0.117787	0.0605887	0.0521142	1248	1393.03	0.0023
R4_N14_INFCERVIX	Inflammatory disease of cervix uteri	-0.114657	0.0591477	0.0527896	-0.467737	0.0993	2.75042e-06	-0.250247	0.105129	0.0174447	1248	1193.96	0.8658
R4_M13_SLE	Systemic lupus erythematosus	-0.204716	0.105642	0.0528701	-0.0181319	0.178628	0.919165	0.0789841	0.15832	0.617946	1248	1817.51	<1e-04
R4_I9_LYMPHADE	Nonspesific lymphadenitis	-0.125668	0.0653895	0.0548546	-0.0247601	0.110602	0.822899	-0.0550393	0.107168	0.607638	1248	1355.08	0.0175
R4_CD2_BENIGN_LIPOMATOUS	Benign lipomatous neoplasm	-0.059098	0.031044	0.0571815	-0.0953097	0.0524933	0.0696634	-0.0849824	0.0496258	0.0870599	1248	1413.47	0.0006
R4_J10_TONSILLITIS	Other and unspecified tonssillitis	0.0497096	0.026689	0.0627605	0.0247148	0.0451127	0.583897	0.0518622	0.0450994	0.250383	1248	1388.68	0.0029
R4_M13_CRYSTALARTH	Other crystal arthropathies	-0.315471	0.170249	0.0641183	-0.283179	0.287679	0.325131	-0.443529	0.279372	0.112632	1248	1312.36	0.1029
R4_K11_CHRONPANC	Chronic pancreatitis	0.0911748	0.0498773	0.0677914	-0.0567855	0.0842385	0.50037	0.0541147	0.0838434	0.51877	1248	1241.95	0.5479
R4_O15_CONCEPT_ABNORM	Other abnormal products of conception	-0.0491185	0.026925	0.0683509	-0.00500425	0.0455319	0.912501	-0.0653076	0.0464919	0.160357	1248	1204.77	0.8108
R4_M13_OSTEOCHONDROPATHY	Other osteochondropathies	0.109025	0.0602966	0.0708255	0.0937033	0.10197	0.358312	0.0564637	0.103943	0.587078	1248	1285.68	0.2282
R4_L12_OTHERDISSKINANDSUBCUTIS	Other disorders of skin and subcutaneous tissue, not elsewhere classified	-0.0802429	0.0445578	0.0719646	-0.059063	0.0753626	0.433355	-0.123706	0.077325	0.109891	1248	1292.43	0.1908
R4_C3_CLL	Chronic lymphocytic leukaemia	0.225087	0.125908	0.0740657	0.407353	0.212706	0.0557085	0.250273	0.222328	0.260512	1248	1276.09	0.2938
R4_N14_PROSTAOTH	Other disorders of prostate	0.178038	0.100378	0.0763605	0.111232	0.16976	0.512441	0.0645653	0.167192	0.699433	1248	1342.11	0.034
R4_I9_NONRHEVALV	Non-rheumatic valve diseases	0.0448683	0.0254911	0.0786262	0.0700438	0.0430925	0.104324	0.0996454	0.0409532	0.0151077	1248	1514.03	<1e-04
R4_G6_MS	MS-disease / Multiple Sclerosis	0.120096	0.0684625	0.0796443	0.0351074	0.115647	0.761504	0.080459	0.114393	0.481964	1248	1458.84	<1e-04
R4_CD2_BENIGN_HEAMANGIOMA_LYMPHANGIOMA	Haemangioma and lymphangioma, any site	0.103932	0.0593389	0.0801064	0.248952	0.100261	0.0131569	0.236795	0.0994224	0.0173817	1248	1286.99	0.2213
R4_H7_VISFIELDDEF	Visual field defects	0.10952	0.0625516	0.0802144	0.137663	0.105802	0.193454	0.0477679	0.101754	0.638834	1248	1340.88	0.0367
R4_N14_BREASTDISOTH	Other disorders of breast	0.0868349	0.0507619	0.0873978	0.0462624	0.0859072	0.590317	0.143571	0.0885136	0.105051	1248	1205.94	0.8031
R4_R18_LOCALIZED_SWELL_MASS_LUMP_SKIN_SUBCU_TISSUE	Localized swelling, mass and lump of skin and subcutaneous tissue	-0.0515097	0.0306147	0.0927193	-0.100672	0.0517707	0.0520504	-0.082752	0.0513359	0.107221	1248	1294.36	0.182
R4_R18_ABNORMAL_FINDI_DIAGNOST_IMAGI_OTHER_BODY_STRUCTURES	Abnormal findings on diagnostic imaging of other body structures	0.101311	0.0603592	0.0935047	0.129635	0.102128	0.204558	0.117029	0.104607	0.263461	1248	1314.84	0.0964
R4_F5_GAD	Generalized anxiety disorder	0.0780396	0.0472062	0.0985491	0.144173	0.0797647	0.0709284	0.120599	0.0780545	0.122584	1248	1298.27	0.1626
R4_K11_GULC	Gastric ulcer	0.0633491	0.0385676	0.100729	0.0714789	0.0652343	0.27341	0.0556522	0.0646759	0.38969	1248	1248.73	0.4933
R4_K11_ABSCANAL	Abscess of anal and rectal regions	0.0936755	0.0570355	0.100758	0.132569	0.0964372	0.169481	0.103149	0.0977278	0.291412	1248	1233.39	0.6153
R4_F5_EMOPER	Emotionally unstable personality disorder	0.0753549	0.0462745	0.103686	0.111169	0.0782508	0.155661	0.102367	0.0735192	0.164052	1248	1455.08	<1e-04
R4_C3_RECTUM	Malignant neoplasm of rectum	-0.0973858	0.0599385	0.104466	-0.0934261	0.101344	0.356776	-0.0942777	0.0990339	0.341295	1248	1228.99	0.6495
R4_F5_OTHPER	Other specified and unspecified personality disorders	0.0741091	0.0470197	0.11525	0.0909229	0.0795516	0.253282	0.123089	0.0797654	0.123051	1248	1253.53	0.4581
R4_K11_OTHABDHER	Other and unspecified abdominal hernia	0.133969	0.0868322	0.123121	0.0226706	0.146763	0.877264	0.189338	0.152989	0.2161	1248	1176.59	0.9307
R4_CD2_BENIGN_SKIN	Other benign neoplasms of skin	0.0371803	0.0251727	0.139925	0.0104395	0.0425724	0.806328	0.0330066	0.0429048	0.441862	1248	1222.64	0.6939
R4_ALCOHOLMENTAL	Mental and behavioural disorders due to alcohol, excluding acute intoxication	-0.035814	0.0243161	0.141043	-0.0804896	0.0411065	0.050444	-0.0479483	0.0377261	0.203981	1248	1419.94	0.0003
R4_I9_SAH	Subarachnoid haemmorrhage	-0.0879708	0.0598154	0.141623	-0.165488	0.101162	0.10212	-0.14389	0.0968825	0.137743	1248	1396.68	0.0017
R4_ST19_TOXIC_EFFECT_ETHAN	Toxic effect of ethanol	-0.115039	0.0785791	0.143449	-0.13557	0.132888	0.30784	-0.0801609	0.133222	0.547476	1248	1324.82	0.068
R4_H7_OTHIRISCILIARY	Other disorders of iris and ciliary body	0.161643	0.110896	0.145198	0.311676	0.187412	0.0965532	0.401712	0.206385	0.0518284	1248	1165.36	0.9573
R4_N14_ABNORMALBLEED	Other abnormal uterine and vaginal bleeding	0.0403026	0.0278837	0.148602	0.00838925	0.0471654	0.858855	0.0369008	0.0474279	0.436694	1248	1231.2	0.631
R4_C3_OTHER_SKIN	Other malignant neoplasms of skin (=non-melanoma skin cancer)	0.0354172	0.0246555	0.151116	0.0552921	0.0416916	0.185011	0.0576983	0.0375364	0.124515	1248	1667.68	<1e-04
R4_M13_ARTHTROSIS_COX	Coxarthrosis,	-0.0349805	0.0246578	0.156254	-0.0194115	0.0416999	0.64165	-0.0448266	0.0409966	0.274419	1248	1496.28	<1e-04
R4_M13_ARTHROSIS_KNEE_PRIM_ICD10	Gonarthrosis,primary	-0.0289413	0.0204465	0.157183	-0.0671092	0.0345737	0.0524776	-0.0497102	0.0290917	0.0877479	1248	1969.22	<1e-04
R4_G6_PARALOTHUNS	Other and unspecified paralytic syndromes	-0.20673	0.146613	0.158778	-0.258431	0.248033	0.29765	0.00602424	0.253732	0.981062	1248	1192.23	0.8719
R4_H8_PERIPHVERTIGO	Other peripheral vertigo	0.0761121	0.0565545	0.178606	0.0313701	0.0956759	0.743059	0.168348	0.0932561	0.0712807	1248	1307.32	0.122
R4_G6_BRACHPLE	Brachial plexus disorders	0.078255	0.058219	0.179145	0.0137791	0.0984969	0.888766	0.083703	0.100524	0.405192	1248	1230.92	0.6332
R4_R18_MALAI_FATIG	Malaise and fatigue	-0.0343018	0.0257855	0.183672	-0.110483	0.0435538	0.0113117	-0.0564085	0.0418816	0.178271	1248	1284.43	0.2371
R4_ST19_TRAUMAT_SUBDU_HAEMORRHAGE	Traumatic subdural haemorrhage	0.0736286	0.0564486	0.192356	-0.0405616	0.0953754	0.670703	0.0511321	0.0923429	0.57987	1248	1412.16	0.0008
R4_L12_LICHENPLANUS	Lichen planus	-0.0784536	0.0606333	0.195938	-0.122908	0.102541	0.230902	-0.0500979	0.08464	0.554029	1248	1982.85	<1e-04
R4_K11_FISSANAL	Fissure and fistula of anal and rectal regions	0.0419232	0.0325397	0.197856	0.151959	0.0549265	0.00574844	0.146454	0.0527741	0.00560052	1248	1359.94	0.0147
R4_G6_CERCYST	Cerebral cysts	-0.0980367	0.0775245	0.206255	-0.129674	0.131097	0.322785	-0.265443	0.132289	0.0450135	1248	1240.01	0.5619
R4_O15_RETAINED_PLAC_MEMB_NO_HEAMORRH	Retained placenta and membranes, without haemorrhage	0.0791367	0.0628009	0.207862	0.217293	0.106165	0.040892	0.149795	0.107083	0.162101	1248	1237.45	0.583
R4_N14_OBSTRUREFLUROPATH	Other obstructive and reflux uropathy	0.0653316	0.0518547	0.207942	0.0424856	0.0876724	0.628049	0.0914297	0.0836347	0.274516	1248	1318.25	0.0859
R4_J10_BRONCHNAS	Unspecified chronic bronchitis	0.120797	0.0962789	0.209838	0.0535802	0.162852	0.742203	0.25103	0.152601	0.100219	1248	1332.51	0.0514
R4_R18_UNSPE_HAEMATU	Unspecified haematuria	0.033017	0.0264619	0.212369	0.0121678	0.044744	0.785711	0.0241196	0.0437574	0.581587	1248	1267.65	0.3526
R4_M13_ARTHROSIS_OTH	Other arthrosis	-0.0282441	0.0240299	0.240071	-0.0236395	0.0406449	0.560934	-0.0397001	0.0377728	0.293452	1248	1462.16	<1e-04
R4_H7_APHAKIA	Aphakia	-0.154384	0.132487	0.244129	-0.0589986	0.223964	0.792263	-0.095936	0.232491	0.679939	1248	1295.15	0.1776
R4_CD2_HODGKIN_LYMPHOMA	Hodgkin lymphoma	0.129902	0.111908	0.245946	0.0367532	0.189215	0.84602	0.0387722	0.189739	0.838117	1248	1235.97	0.597
R4_ASTHMA_HOSPITAL_MAIN	Asthma, hospital admissions , main diagnosis only	-0.0224073	0.0193056	0.246001	-0.070105	0.0326171	0.0317999	-0.0142335	0.0291786	0.625774	1248	1667.45	<1e-04
R4_J10_NASALPOLYP	Nasal polyp	-0.0445823	0.0387023	0.249571	-0.12333	0.0654194	0.0596331	-0.0944116	0.0603801	0.11816	1248	1394.02	0.0019
R4_I9_VARICVEOES	Oesophageal varices	-0.10978	0.0953831	0.249979	-0.174398	0.161427	0.280195	-0.0397238	0.169613	0.814866	1248	1215.37	0.7451
R4_N14_OTHBLADD	Other disorders of bladder	-0.0590562	0.0514819	0.251549	-0.0588621	0.0870258	0.498928	-0.0766739	0.0917426	0.403455	1248	1180.14	0.9202
R4_F5_ANXIETY	Other anxiety disorders	0.0288732	0.0257486	0.262355	0.0156754	0.0435466	0.718931	-0.0193695	0.0401323	0.629436	1248	1452.89	<1e-04
R4_D3_IMMUDEFANTIBODY	Immunodeficiency with predominantly antibody defects	-0.120556	0.108742	0.267797	0.141425	0.183826	0.441836	-0.057592	0.174366	0.741234	1248	1317.32	0.088
R4_J10_EMPHYSEMA	Emphysema	0.0907775	0.0824809	0.271288	0.000744601	0.139512	0.995742	0.163597	0.135543	0.227673	1248	1307.87	0.1195
R4_G6_SLEEPDISOTH	Other sleepdisorders	0.0567556	0.0523664	0.278655	-0.0701829	0.0884297	0.427546	-0.00876094	0.0914248	0.923674	1248	1278.98	0.2726
R4_D3_ACQHAEMOLYTICANAEMIA	Acquired haemolytic anaemia	-0.133333	0.128016	0.297827	-0.323656	0.216455	0.135101	-0.240664	0.205833	0.24254	1248	1324.8	0.0682
R4_M13_FIBROBLASTIC	Fibroblastic disorders	-0.0334031	0.0335248	0.319264	-0.0623649	0.0566943	0.271535	-0.0374682	0.0562159	0.505211	1248	1298.89	0.1592
R4_J10_SINUSITIS	Acute sinusitis	-0.0211371	0.0212853	0.320885	-0.0490182	0.0359849	0.173384	-0.00950827	0.0340804	0.780295	1248	1435.71	0.0003
R4_N14_NEUROMUSCDYSBLADD	Neuromuscular dysfuntion of bladder	0.0598527	0.0605329	0.32297	0.0259134	0.10236	0.800187	-0.0184234	0.104078	0.859526	1248	1327.1	0.062
R4_M13_PYOGARTH	Pyogenic arthritis	0.0609335	0.0638447	0.340065	0.153958	0.107903	0.153883	0.125884	0.11174	0.260139	1248	1292.29	0.1912
R4_L12_DERM_NAS	Other and unspecified dermatitis	-0.0224338	0.0238437	0.346955	-0.0191741	0.0403432	0.634675	-0.0256563	0.0406708	0.528269	1248	1337.6	0.0413
R4_ST19_COMPLICATIO_CARDIAC_VASCULAR_PROSTHET_DEVICES_IMPLANTS_GRAFTS	Complications of cardiac and vascular prosthetic devices, implants and grafts	0.123255	0.131174	0.347592	-0.0534518	0.221757	0.809566	0.133463	0.222236	0.548253	1248	1292.23	0.1913
R4_R18_MOUTH_BREAT	Mouth breathing	0.024314	0.0263993	0.357224	-0.0838428	0.0444973	0.0597677	-0.0085965	0.043176	0.842214	1248	1425.16	0.0003
R4_ST19_BURNS_CORROSIO	Burns and corrosions	0.0418078	0.0459588	0.363167	-0.0378672	0.0776728	0.625974	0.040217	0.0774406	0.603625	1248	1295.7	0.1745
R4_C3_LARYNX	Malignant neoplasm of larynx	-0.131392	0.145016	0.365084	-0.331991	0.245248	0.176079	-0.0197439	0.254787	0.938245	1248	1191.99	0.8734
R4_J10_PERITONSABSC	Peritonsillar abscess	0.0313858	0.0354778	0.37651	0.0893705	0.0600062	0.136647	0.102837	0.0593909	0.0836041	1248	1450.61	<1e-04
R4_R18_OTHER_SKIN_CHANG	Other skin changes	0.0490122	0.0572701	0.392269	0.0670399	0.0968467	0.488924	-0.00324084	0.0965625	0.973232	1248	1225.58	0.6726
R4_INFLUENZA	All influenza (not pneumonia)	-0.0347372	0.0412344	0.399708	-0.0291392	0.0697263	0.676087	-0.0602995	0.0697609	0.387548	1248	1263.98	0.3786
R4_M13_PLANTARFASC	Plantar fascial fibromatosis	-0.0448147	0.0544626	0.410749	-0.0772133	0.0922033	0.402515	-0.0922234	0.0921669	0.317208	1248	1325.05	0.0673
R4_I9_RBBB	Right bundle-branch block	0.0824309	0.100471	0.412119	0.0985002	0.169789	0.561929	0.000943763	0.167995	0.995519	1248	1243.54	0.5344
R4_K11_VASCINT	Vascular disorders of the intestines	0.0618156	0.0770779	0.422713	-0.034834	0.130392	0.7894	0.028268	0.130641	0.828727	1248	1247.01	0.5076
R4_COPD_LATER	Later onset COPD	-0.0301852	0.0400608	0.451302	-0.103621	0.0677144	0.126206	0.0275625	0.0686715	0.688219	1248	1301.45	0.146
R4_H8_EXTOTITIS	Otitis externa	0.0275296	0.0379544	0.468383	0.0408033	0.0642102	0.525242	0.0328145	0.0641902	0.609296	1248	1290.44	0.2024
R4_M13_MUSCLE	Disorders of muscles	-0.0389151	0.0551762	0.480763	-0.13178	0.0932838	0.158	-0.117631	0.0922321	0.202411	1248	1352.01	0.0205
R4_L12_NAIL_INGROW	Ingrowing nail	-0.0511756	0.0728717	0.482642	-0.0765386	0.123165	0.534428	-0.151656	0.127326	0.233846	1248	1237.29	0.5845
R4_CD2_BENIGN_EAR_RESP	Benign neoplasm of middle ear and respiratory system	0.0450473	0.0647362	0.486647	-0.111939	0.10938	0.306318	0.0456689	0.107414	0.670788	1248	1245.1	0.5229
R4_L12_CORNSANDCALLOS	Corns and callosities	-0.0430319	0.0623398	0.490147	-0.121799	0.105427	0.248191	-0.0150099	0.104807	0.886144	1248	1265.45	0.368
R4_D3_SPLEENDISEASE	Diseases of spleen	0.112899	0.165229	0.494554	0.234855	0.279212	0.400433	0.362262	0.276062	0.189677	1248	1242.22	0.5451
R4_N14_NEPHRITICNAS	Unspesified nephritic syndrome	0.0426803	0.0634759	0.501462	0.162075	0.107303	0.131183	-0.0519642	0.107166	0.627835	1248	1364.47	0.0116
R4_O15_MATERN_CARE_DISPROP	Maternal care for known or suspected disproportion	0.0520992	0.0777961	0.50318	-0.0837835	0.131541	0.524282	0.0283496	0.133287	0.831599	1248	1231	0.6325
R4_K11_CHOLANGI	Cholangitis (primary sclerosing, PSC)	0.0536972	0.0864955	0.534839	-0.0373675	0.146236	0.798357	-0.108555	0.13629	0.425893	1248	1578.33	<1e-04
R4_O15_FAILED_INDUCT	Failed induction of labour	-0.0556886	0.0897101	0.534869	0.0128822	0.151603	0.932296	0.0589755	0.148583	0.691495	1248	1240.29	0.5595
R4_C3_SCLC	Small cell lung cancer	0.086556	0.140449	0.537823	0.17508	0.237634	0.461405	0.0989661	0.241059	0.681475	1248	1199.46	0.8374
R4_I9_LBBB	Left bundle-branch block	0.0463291	0.0755246	0.539704	0.0858382	0.127616	0.501308	0.108284	0.129015	0.401455	1248	1263.59	0.3817
R4_Z21_ARTIF_OPENI_STATUS	Artificial opening status	0.0632691	0.103846	0.542464	0.110977	0.175731	0.527817	0.0349354	0.169017	0.83628	1248	1280.31	0.2634
R4_M13_ARTHINOTH	Arthropathies in other diseases classified elsewhere	0.0564433	0.0952279	0.553477	0.0344329	0.161058	0.830744	0.138155	0.165066	0.402773	1248	1312.43	0.1029
R4_H7_IRIDOCYCLITISINOTH	Iridocyclitis in diseases classified elsewhere	-0.0878062	0.153728	0.567983	-0.0427115	0.259985	0.869534	-0.270575	0.243316	0.266339	1248	1443.72	0.0001
R4_L12_LICHSIMPANDPRURIGO	Lichen simplex chronicus and prurigo	-0.0420388	0.0748083	0.574248	-0.171427	0.126469	0.175507	-0.12258	0.122696	0.317965	1248	1385.98	0.0037
R4_N14_PROSTHYPERPLA	Hyperplasia of prostate	0.0137106	0.0249924	0.583385	-0.099449	0.0420424	0.0181608	-0.0105742	0.0420858	0.80166	1248	1498.11	<1e-04
R4_J10_COPDNAS	Other chronic obstructive pulmonary disease	-0.0150589	0.0296095	0.611134	-0.0236483	0.0500754	0.636828	0.00994135	0.0470377	0.83265	1248	1484.33	<1e-04
R4_CD2_MULTIPLE_MYELOMA_PLASMA_CELL	Multiple myeloma and malignant plasma cell neoplasms	-0.0436132	0.0860746	0.612461	0.00284959	0.145577	0.984386	-0.0575218	0.144585	0.690817	1248	1221.06	0.7053
R4_K11_HERING	Inguinal hernia	0.0103886	0.0209796	0.620563	0.0767105	0.0353922	0.03039	-0.014286	0.032281	0.658167	1248	1753.67	<1e-04
R4_M13_MYOSITIS	Myositis	-0.0579571	0.117187	0.620992	-0.0776665	0.198269	0.69533	-0.384677	0.193682	0.0472375	1248	1349.87	0.0229
R4_R18_ABNORMAL_FINDI_DIAGNOST_IMAGI_CENTRAL_NERVOUS_SYSTEM	Abnormal findings on diagnostic imaging of central nervous system	-0.051007	0.111493	0.647398	0.249239	0.1882	0.185637	0.0822575	0.18908	0.663607	1248	1324.93	0.0679
R4_C3_LIVER_INTRAHEPATIC_BILE_DUCTS	Malignant neoplasm of liver and intrahepatic bile ducts	-0.0505794	0.114575	0.658961	-0.143429	0.194119	0.460123	-0.00742242	0.190447	0.968918	1248	1354.99	0.0174
R4_K11_HEPFAIL	Hepatic failure, not elsewhere classified	0.0443034	0.102507	0.665672	0.0286543	0.173458	0.868818	-0.011876	0.168342	0.94377	1248	1320.39	0.0799
R4_H8_VESTIFUNCNAS	Other/unspecified disorders of vestibular function	0.0432136	0.101672	0.67089	-0.411431	0.171286	0.0164507	-0.0402082	0.161078	0.802923	1248	1321.89	0.0753
R4_D3_BLOODNAS	Other and unspecified diseases of blood and blood-forming organs	-0.0530935	0.125096	0.671332	0.112633	0.211551	0.594534	0.0246949	0.217544	0.909639	1248	1229.08	0.6482
R4_Q17_OTHER_CONGEN_MALFO_CIRCULATO_SYSTEM	Other congenital malformations of circulatory system	-0.0470765	0.113054	0.677184	0.0430557	0.191208	0.821879	-0.060687	0.190587	0.750219	1248	1190.36	0.8808
R4_M13_JOINTOTH	Other specific joint derangements/joint disorders	-0.00771638	0.0187477	0.68071	-0.0211451	0.0317084	0.504983	-0.0311391	0.0312529	0.319269	1248	1415.6	0.0005
R4_N14_HYDRONEPHR	Hydronephrosis	-0.0238467	0.0581476	0.681798	-0.0464407	0.0983184	0.63676	0.0282717	0.0953316	0.766851	1248	1380.42	0.0056
R4_I9_OTHILLHEART	Other or ill-defined heart diseases	-0.0297126	0.074027	0.688212	-0.00763759	0.125109	0.951331	-0.0431047	0.128951	0.73823	1248	1247.34	0.5047
R4_L12_HYPERTROPHICSKIN	Hypertrophic disorders of skin	0.0278733	0.0697224	0.689391	-0.143105	0.11775	0.224473	-0.0128928	0.124855	0.917771	1248	1185.86	0.8994
R4_H7_OPTNEUROTH	Other disorders of optic [2nd] nerve and visual pathways	-0.0279012	0.0710207	0.69449	0.0521226	0.120022	0.664164	-0.174407	0.127768	0.17249	1248	1149.85	0.9783
R4_C3_BRONCHUS_LUNG	Malignant neoplasm of bronchus and lung	-0.0188426	0.0486115	0.698366	-0.111538	0.0821687	0.174893	-0.00134622	0.0821111	0.986922	1248	1242.51	0.5432
R4_E4_HYPOOSMNAT	Hypo-osmolality and hyponatraemia	-0.0175993	0.0457308	0.700417	-0.187557	0.0771517	0.015197	-0.00242715	0.0754851	0.974354	1248	1300.94	0.1487
R4_R18_ASCITES	Ascites	0.0298166	0.0775713	0.700765	0.148549	0.131106	0.257412	0.117027	0.136573	0.391675	1248	1225.58	0.6729
R4_H7_BCKRNDRETINOPAT	Background retinopathy and retinal vascular changes	-0.043598	0.113942	0.702057	-0.130575	0.192647	0.498028	-0.097172	0.193955	0.616457	1248	1216.48	0.7371
R4_E4_ADRENAL	Other disorders of adrenal gland	0.0362831	0.0954068	0.703789	-0.222677	0.161184	0.167369	0.0201748	0.164474	0.902394	1248	1331.34	0.0538
R4_F5_SLEEP	Sleep disorders	0.0162606	0.0441551	0.71274	0.10104	0.0745939	0.175814	0.0343868	0.0771414	0.655846	1248	1241.68	0.5506
R4_K11_ENERCOLNONINF	Noninfective enteritis and colitis	-0.00916652	0.024919	0.713046	-0.010747	0.0421591	0.79883	-0.0467328	0.0402708	0.246083	1248	1450.63	<1e-04
R4_G6_HEMIPLE	Hemiplegia	0.0271329	0.0737865	0.713143	-0.102236	0.124774	0.412731	0.0841307	0.123364	0.495384	1248	1368.04	0.0098
R4_F5_DELUSIO	Persistent delusional disorders	0.0199773	0.0543833	0.713426	-0.0127593	0.092032	0.889757	-0.00893477	0.0950956	0.925159	1248	1147.58	0.9801
R4_N14_GLOMEINOTH	Glomerular disorders in diseases classified elsewhere	-0.0202742	0.0557809	0.716322	-0.0258268	0.0944042	0.784455	-0.0197149	0.0888634	0.824462	1248	1561.76	<1e-04
R4_H7_HEREDRETINADYST	Hereditary retinal dystrophy	0.0463259	0.13699	0.735292	0.00934132	0.231927	0.967879	0.100194	0.23975	0.676085	1248	1188.52	0.8878
R4_J10_ACUTEUPPERINFEC	Acute upper respiratory infections of multiple and unspecified sites	0.00557632	0.016605	0.737063	-0.0318942	0.0280511	0.255756	0.0173155	0.0267853	0.518104	1248	1331.98	0.053
R4_K11_FIBROCHIRLIV	Fibrosis and chirrhosis of liver	0.0254235	0.0791933	0.748241	-0.206744	0.133724	0.122347	-0.00785429	0.132625	0.952785	1248	1383.31	0.0047
R4_R18_OTHER_SYMPTOMS_SIGNS_INVOLVI_CIRCULATO_RESPI_SYSTEMS	Other symptoms and signs involving the circulatory and respiratory systems	-0.0249611	0.0783067	0.749961	0.0494978	0.132414	0.708609	-0.00955761	0.12957	0.94121	1248	1260.55	0.403
R4_Z21_PERSONAL_HISTORY_CERTA_OTH_DISEA	Personal history of certain other diseases	0.0516861	0.163399	0.751813	-0.0547395	0.275969	0.842801	-0.361608	0.282591	0.200918	1248	1289.4	0.2069
R4_N14_FEMGENFISTUL	Fistulae involving female genital tract	0.0426715	0.141504	0.76304	-0.0449208	0.239511	0.851258	0.164787	0.240599	0.493531	1248	1229.76	0.6426
R4_R18_SOMNO_STUPOR_COMA	Somnolence, stupor and coma	-0.0232716	0.0823182	0.777451	-0.211191	0.139116	0.129244	-0.250795	0.135646	0.0647096	1248	1326.54	0.0634
R4_N14_PHIMOSIS	Redundant prepuce, phimosis and paraphimosis	-0.0102298	0.0372007	0.78337	-0.0115059	0.0628848	0.854853	0.0485314	0.0606275	0.423582	1248	1438.64	0.0003
R4_D3_IMMUNEMECHANISMNAS	Other and unspecified disorders involving the immune mechanism, not elsewhere classified	-0.027988	0.106394	0.792548	0.0438972	0.179943	0.807309	-0.0110398	0.189107	0.953456	1248	1207.27	0.7937
R4_D3_PURPURA_AND3_OTHER_HAEMORRHAGIC	Purpura and other haemorrhagic conditions	0.0126499	0.0498324	0.799654	0.0807694	0.0842421	0.337857	0.0134584	0.0856481	0.875163	1248	1309.71	0.1135
R4_M13_KNEEDERANGEMENTS	Internar derangement of knee	0.0045003	0.0185899	0.808756	-0.0543914	0.0313749	0.0832369	-0.0267353	0.0289299	0.355592	1248	1646.03	<1e-04
R4_K11_CHRONGASTR	Chronic gastritis	0.00671964	0.0284035	0.813023	0.0966254	0.0479472	0.044093	0.039794	0.0499464	0.425758	1248	1267.3	0.3558
R4_I9_ANEURYSM	Cerebral aneurysm, nonruptured	0.0147811	0.0658489	0.822429	0.149966	0.111351	0.178294	0.0578448	0.117963	0.623963	1248	1194.75	0.8618
R4_K11_OTHINFLIV	Other inflammatory liver diseases	-0.0154089	0.0686876	0.822535	0.0353157	0.116233	0.761305	0.1391	0.113541	0.220766	1248	1297.15	0.1673
R4_L12_PARAPSORI	Parapsoriasis	0.0268368	0.12074	0.824141	0.0261961	0.204102	0.897894	0.270645	0.214239	0.206724	1248	1125.77	0.994
R4_ST19_COMPLICATIO_GENITO_PROSTHET_DEVICES_IMPLANTS_GRAFTS	Complications of genitourinary prosthetic devices, implants and grafts	-0.02389	0.119805	0.841977	-0.081888	0.20268	0.686263	0.0502038	0.208533	0.809791	1248	1246.19	0.5144
R4_H7_REFRAACCOMMODIS	Disorders of refraction and accommodation	0.00584313	0.0374425	0.876014	-0.0129299	0.0633246	0.838243	0.0176296	0.0632964	0.780656	1248	1395.55	0.0018
R4_C3_COLORECTAL	Colorectal cancer	-0.0057233	0.0395034	0.884828	-0.0729456	0.0667587	0.274748	-0.0548559	0.066316	0.408288	1248	1421.5	0.0003
R4_L12_DERMATITISNAS	Other and unspecified dermatitis	-0.00300396	0.0216004	0.889418	-0.00214763	0.0365469	0.95315	-0.0198705	0.0347997	0.568104	1248	1362.28	0.0129
R4_O15_LABOUR_FETAL_STRESS	Labour and delivery complicated by fetal stress [distress]	0.00458091	0.0357568	0.89808	-0.0072328	0.0604935	0.904848	-0.0256831	0.0588942	0.662847	1248	1219.45	0.7156
R4_G6_AUTONOM	Autonomic disorders	0.0152155	0.130555	0.90724	0.34827	0.220383	0.114293	0.0956006	0.224851	0.670784	1248	1279.37	0.2699
R4_M13_MENISCUSDERANGEMENTS	Meniscus derangement	0.00205513	0.0216713	0.924464	-0.0553656	0.0365963	0.130565	0.00811694	0.0314018	0.796074	1248	1649.88	<1e-04
R4_N14_CALCULOWER	Calculus of lower urinary tract	0.00584177	0.0824677	0.943539	-0.0563253	0.139391	0.686221	-0.106771	0.137069	0.43615	1248	1261.72	0.3963
R4_I9_VASCINT	Vascular diseases of the intestine	0.00726064	0.104732	0.944741	0.0216051	0.177274	0.903018	-0.0574855	0.173938	0.741082	1248	1311.44	0.1055
R4_CD2_BENIGN_LIPO_SKIN_LIMBS	Benign lipomatous neoplasm of skin and subcutaneous tissue of limbs	0.00403188	0.0620067	0.948166	-0.0639122	0.104866	0.542327	-0.0798515	0.105196	0.447952	1248	1293.26	0.1863
R4_ST19_FRACT_RIBS_STERNUM_THORACIC_SPINE	Fracture of rib(s), sternum and thoracic spine	-0.00175807	0.0333639	0.957984	-0.0432725	0.0564098	0.443161	-0.010145	0.0575574	0.86012	1248	1314.52	0.0975
R4_K11_HAEMORR	Haemmorrhoids and perianal venous thrombosis	-0.00147557	0.0371659	0.968337	-0.0636698	0.0628606	0.311317	-0.0236637	0.0570288	0.678254	1248	1513.72	<1e-04
R4_F5_SCHIZOAFF	Schizoaffective disorder	0.00124557	0.0591039	0.98319	0.11217	0.0999515	0.261973	-0.0355411	0.0997574	0.721694	1248	1341.15	0.0361
R4_MEMLOSS	Memory loss	0.00113271	0.0554981	0.98372	-0.15744	0.0937445	0.0933128	-0.0113395	0.0940911	0.904094	1248	1305.81	0.1282
R4_R18_OTHER_SYMPTOMS_SIGNS_INVOLVI_DIGES_SYSTEM_ABDOMEN	Other symptoms and signs involving the digestive system and abdomen	0.000689394	0.0425181	0.987066	0.0655317	0.0718777	0.362097	0.081593	0.0740792	0.270922	1248	1299.72	0.1548
R4_N14_NEPHROTICSYND	Nephrotic syndrome	-0.000633212	0.0977798	0.994834	0.104744	0.165455	0.526809	-0.00400592	0.162545	0.980342	1248	1378.89	0.0056
R4_D3_IMMUNEMECHANISMOTHER	Other disorders involving the immune mechanism, not elsewhere classified	-0.000607195	0.100957	0.995202	-0.0170737	0.170762	0.920372	-0.0697046	0.172334	0.685933	1248	1153.99	0.9747
