# Supplementary material for: Phenome-wide Mendelian randomization study of plasma triglyceride levels and 2600 disease traits
Source: eLife. 2023 Mar 29;12:e80560. doi: 10.7554/eLife.80560 (PMC10079290; doi:10.7554/eLife.80560)
Supplement: Supplementary file 3. — Shown are the estimates, standard deviations, and p-values of IVW-MR results in the discovery analysis, before and after outlier IV removal, for significant and replicated traits (tier 1–3) that had significant MR-PRESSO global test results (p<0.05) in the primary IVW analysis of the discovery UKB cohort. [file elife-80560-supp3.xlsx]

## Sheet: Sheet1
Outcome	Description	Primary IVW without MR-PRESSO				Sensitivity IVW after MR-PRESSO and outlier removal
		IVW_Estimate	IVW_Sd	IVW_Pvalue	Number_snps	IVW_Estimate	IVW_Sd	IVW_Pvalue	Number_snps	Removed_snps
icd10-E78-both_sexes	Disorders of lipoprotein metabolism and other lipidemias	0.565649	0.0525837	4.81531e-20	141	0.586774	0.0296649	1.94225e-41	134	7
phecode-411.3-both_sexes	Angina pectoris	0.330623	0.04069	2.10805e-13	141	0.350619	0.0323512	3.77994e-20	138	3
phecode-411-both_sexes	Ischemic heart disease	0.287295	0.0354823	2.47396e-13	141	0.302939	0.0284221	1.08507e-19	138	3
phecode-272.1-both_sexes	Hyperlipidemia	0.572556	0.0531124	4.20121e-20	141	0.600933	0.0305297	2.31307e-41	135	6
phecode-411.4-both_sexes	Coronary atherosclerosis	0.368008	0.0472054	1.31827e-12	141	0.388277	0.0373217	4.84946e-19	138	3
phecode-411.1-both_sexes	Unstable angina pectoris	0.416846	0.0606315	1.8844e-10	141	0.447971	0.0584458	2.7921e-12	140	1
phecode-411.2-both_sexes	Myocardial infarction	0.34211	0.0470947	2.38718e-11	141	0.361427	0.0405641	2.67318e-15	139	2
icd10-M10-both_sexes	Gout	0.578842	0.0820806	7.408e-11	141	0.578842	0.0820806	7.40796e-11	141	0
icd10-D25-both_sexes	Leiomyoma of uterus	0.175443	0.0385795	1.16455e-05	141	0.175443	0.0385795	1.16455e-05	141	0
phecode-401-both_sexes	Hypertension	0.140949	0.0327917	3.20374e-05	141	0.157884	0.0267049	2.80125e-08	131	10
phecode-442.1-both_sexes	Aortic aneurysm	0.296604	0.045111	0.003089	141	0.24361	0.0809032	0.00308887	141	0
icd10-K70-both_sexes	Alcoholic liver disease	-0.387792	0.115563	0.00101922	141	-0.387792	0.115563	0.00101922	141	0
icd10-R07-both_sexes	Pain in throat and chest	0.0668795	0.022772	0.00390793	141	0.0668795	0.022772	0.00390793	134	0
icd10-K57-both_sexes	Diverticular disease of intestine	0.0608453	0.0249125	0.0158378	141	0.0608453	0.0249125	0.0158378	141	0
icd10-R04-both_sexes	Hemorrhage from respiratory passages	0.243034	0.0618595	0.000133577	141	0.243034	0.0618595	0.000133577	141	0
icd10-N20-both_sexes	Calculus of kidney and ureter	0.204909	0.068347	0.00321589	141	0.204909	0.068347	0.00321589	141	0
