# Supplementary material for: Phenome-wide Mendelian randomization study of plasma triglyceride levels and 2600 disease traits
Source: eLife. 2023 Mar 29;12:e80560. doi: 10.7554/eLife.80560 (PMC10079290; doi:10.7554/eLife.80560)
Supplement: Supplementary file 4. — Shown are the estimates, standard deviations, and p-values of multivariable IVW-MR results controlling for HDL-C, LDL-C, ApoB levels, or all three, in the discovery stage. Only tier 1–3 results significant and replicated as predefined in the methods were examined in this analysis. [file elife-80560-supp4.xlsx]

## Sheet: TG_UKB_MVMR
Outcome	Description	IVW Estimate					IVW SD					IVW P-value
		TG	HDL + TG	LDL + TG	HDL + LDL + TG	HDL + LDL + TG + ApoB	TG	HDL + TG	LDL + TG	HDL + LDL + TG	HDL + LDL + TG + ApoB	TG	HDL + TG	LDL + TG	HDL + LDL + TG	HDL + LDL + TG + ApoB
icd10-E78-both_sexes	Disorders of lipoprotein metabolism and other lipidemias	0.565649	0.527106	0.418778	0.444231	0.422842	0.0525837	0.0589489	0.028119	0.0304485	0.0352905	4.81531e-20	2.13e-15	1.39e-30	9.45e-30	4.47369e-23
phecode-411.3-both_sexes	Angina pectoris	0.330623	0.266585	0.260042	0.231048	0.183983	0.04069	0.0443639	0.0354597	0.0385121	0.0441659	2.10805e-13	1.55e-08	1.69e-11	1.65e-08	5.46349e-05
phecode-411-both_sexes	Ischemic heart disease	0.287295	0.22816	0.224963	0.197094	0.157216	0.0354823	0.0385162	0.0307026	0.0332524	0.0381586	2.47396e-13	2.35e-08	1.74e-11	2.34e-08	6.52103e-05
phecode-272.1-both_sexes	Hyperlipidemia	0.572556	0.534563	0.423945	0.450587	0.430373	0.0531124	0.0595627	0.0282921	0.0305975	0.0354852	4.20121e-20	1.76e-15	8.2e-31	4.3e-30	1.88798e-23
phecode-411.4-both_sexes	Coronary atherosclerosis	0.368008	0.299299	0.281793	0.254855	0.208232	0.0472054	0.0517433	0.0403481	0.043997	0.0506617	1.31827e-12	4.61e-08	1.08e-10	4.48e-08	6.77252e-05
phecode-411.1-both_sexes	Unstable angina pectoris	0.416846	0.366245	0.356455	0.336177	0.268595	0.0606315	0.0677515	0.0596431	0.0654437	0.075402	1.8844e-10	2.73e-07	1.82e-08	9.34e-07	0.000506515
phecode-411.2-both_sexes	Myocardial infarction	0.34211	0.278049	0.266192	0.239897	0.182287	0.0470947	0.0517947	0.0420245	0.045879	0.0525744	2.38718e-11	3.25e-07	3.09e-09	6.18e-07	0.000702942
icd10-M10-both_sexes	Gout	0.578842	0.568406	0.597563	0.579624	0.480422	0.0820806	0.0926175	0.0850075	0.093412	0.107541	7.40796e-11	8.26e-09	8.53e-11	5.99e-09	1.64303e-05
icd10-D25-both_sexes	Leiomyoma of uterus	0.175443	0.184924	0.170337	0.181426	0.19552	0.0385795	0.0435169	0.0400128	0.0439583	0.0511567	1.16455e-05	3.9e-05	3.79e-05	6.32e-05	0.000200118
phecode-442-both_sexes	Other aneurysm	0.320152	0.230885	0.28904	0.219825	0.308093	0.0707851	0.0781681	0.0727541	0.0787254	0.0905345	1.28955e-05	0.00368816	0.000113565	0.00597666	0.000874056
phecode-401-both_sexes	Hypertension	0.140949	0.140949	0.124756	0.0980711	0.115127	0.0327917	0.0327917	0.0336145	0.0365515	0.042496	3.20374e-05	3.20374e-05	0.000297337	0.00818633	0.00760756
phecode-442.1-both_sexes	Aortic aneurysm	0.296604	0.24361	0.194628	0.077987	0.123683	0.045111	0.0809032	0.0824156	0.0873492	0.10149	7.13784e-11	0.00308887	0.0195869	0.373509	0.225061
phecode-427.42-both_sexes	Cardiac arrest	0.275607	0.275607	0.204809	0.200778	0.0881587	0.0864662	0.0864662	0.0866678	0.0953109	0.109435	0.00177058	0.00177058	0.0195053	0.0369661	0.42188
icd10-K70-both_sexes	Alcoholic liver disease	-0.387792	-0.387792	-0.397951	-0.531547	-0.476164	0.115563	0.115563	0.120003	0.128837	0.149744	0.00101922	0.00101922	0.00116448	6.35603e-05	0.00182238
icd10-R07-both_sexes	Pain in throat and chest	0.0668795	0.0668795	0.0559573	0.0339314	0.0178697	0.022772	0.022772	0.0232843	0.0252728	0.0296398	0.00390793	0.00390793	0.0176416	0.181722	0.547629
icd10-K57-both_sexes	Diverticular disease of intestine	0.0608453	0.0608453	0.0621029	0.0458142	0.05943	0.0249125	0.0249125	0.0258618	0.0282379	0.0328208	0.0158378	0.0158378	0.0176578	0.106992	0.0723721
icd10-R04-both_sexes	Hemorrhage from respiratory passages	0.243034	0.243034	0.229195	0.270686	0.35657	0.0618595	0.0618595	0.0640641	0.0699134	0.0801709	0.000133577	0.000133577	0.000477867	0.000166157	1.78049e-05
icd10-I47-both_sexes	Paroxysmal tachycardia	0.186033	0.186033	0.181816	0.22058	0.240864	0.0553428	0.0553428	0.0574369	0.0626528	0.0729193	0.000999705	0.000999705	0.00190274	0.000583757	0.00121978
icd10-N20-both_sexes	Calculus of kidney and ureter	0.204909	0.204909	0.226577	0.280253	0.361001	0.068347	0.068347	0.0706015	0.0768204	0.0884631	0.00321589	0.00321589	0.00165276	0.000373522	7.5836e-05
