# Supplementary material for: Phenome-wide Mendelian randomization study of plasma triglyceride levels and 2600 disease traits
Source: eLife. 2023 Mar 29;12:e80560. doi: 10.7554/eLife.80560 (PMC10079290; doi:10.7554/eLife.80560)
Supplement: Supplementary file 5. — Shown are the estimates, standard deviations, and p-values of IVW-MR results when using GLGC data to select instruments for plasma TG levels, as was done in the discovery analysis. [file elife-80560-supp5.xlsx]

## Sheet: Sheet1
Trait	IVW_Estimate	IVW_SD	IVW_P	Significance	Analysis	Tier
Disorders of lipoprotein metabolism	0.579887	0.0711185	1.99723e-13	Bonferroni	GLGC TG SNPs	Tier 1 (BB)
Angina pectoris	0.411877	0.0507982	2.57545e-13	Bonferroni	GLGC TG SNPs	Tier 1 (BB)
Ischemic heart disease	0.314202	0.0457318	2.05176e-10	Bonferroni	GLGC TG SNPs	Tier 1 (BB)
Hyperlipidemia	0.598604	0.083393	4.06502e-11	Bonferroni	GLGC TG SNPs	Tier 1 (BB)
Coronary atherosclerosis	0.350937	0.0534645	9.97909e-10	Bonferroni	GLGC TG SNPs	Tier 1 (BB)
Unstable angina pectoris	0.414093	0.0615371	4.27236e-10	Bonferroni	GLGC TG SNPs	Tier 1 (BB)
Myocardial infarction	0.279522	0.0572709	2.89655e-06	Bonferroni	GLGC TG SNPs	Tier 1 (BB)
Gout	0.24575	0.0845685	0.00427138	Nominal	GLGC TG SNPs	Tier 2 (BN)
*Leiomyoma of uterus	0.058098	0.0399684	0.148345	Null	GLGC TG SNPs	Tier 2 (BN)
*Other aneurysm	0.215621	0.165333	0.194366	Null	GLGC TG SNPs	Tier 2 (BN)
*Hypertension	0.179923	0.0343335	5.91377e-07	Bonferroni	GLGC TG SNPs	Tier 3 (NB)
Aortic aneurysm	0.442065	0.0848054	6.7014e-07	Bonferroni	GLGC TG SNPs	Tier 3 (NB)
Cardiac arrest	0.473059	0.130774	0.000417427	Nominal	GLGC TG SNPs	Tier 3 (NB)
*Alcoholic liver disease	-0.394472	0.098964	0.000108754	Bonferroni	GLGC TG SNPs	Tier 3 (NB)
*Pain in throat and chest	0.0766859	0.0301098	0.0119741	Nominal	GLGC TG SNPs	Tier 3 (NB)
*Diverticular disease of intestine	0.0391177	0.044137	0.37702	Null	GLGC TG SNPs	Tier 3 (NB)
*Hemorrhage from respiratory passages	0.15752	0.0640633	0.0151864	Nominal	GLGC TG SNPs	Tier 3 (NB)
*Paroxysmal tachycardia	0.195002	0.0572691	0.000868282	Nominal	GLGC TG SNPs	Tier 3 (NB)
*Calculus of kidney and ureter	0.225953	0.0656823	0.00077102	Nominal	GLGC TG SNPs	Tier 3 (NB)
Hyperlipidemia	0.362328	0.0340436	2.22041e-25	Bonferroni	UKB TG SNPs	Tier 1 (BB)
Disorders of lipoprotein metabolism	0.365604	0.0239073	1.62107e-48	Bonferroni	UKB TG SNPs	Tier 1 (BB)
Angina pectoris	0.264824	0.0242241	1.24966e-26	Bonferroni	UKB TG SNPs	Tier 1 (BB)
Ischemic heart disease	0.216967	0.0202648	1.18651e-25	Bonferroni	UKB TG SNPs	Tier 1 (BB)
Coronary atherosclerosis	0.231443	0.0231247	9.81799e-23	Bonferroni	UKB TG SNPs	Tier 1 (BB)
Myocardial infarction	0.19029	0.0262527	7.37503e-13	Bonferroni	UKB TG SNPs	Tier 1 (BB)
Unstable angina pectoris	0.269081	0.0327391	5.09618e-16	Bonferroni	UKB TG SNPs	Tier 1 (BB)
Gout	0.124116	0.0391389	0.00155529	Nominal	UKB TG SNPs	Tier 2 (BN)
*Leiomyoma of uterus	0.0600524	0.0205905	0.00360305	Nominal	UKB TG SNPs	Tier 2 (BN)
*Other aneurysm	0.191455	0.0856447	0.0255637	Nominal	UKB TG SNPs	Tier 2 (BN)
*Hypertension	0.160457	0.0173477	9.49016e-20	Bonferroni	UKB TG SNPs	Tier 3 (NB)
Aortic aneurysm	0.297	0.045	7.13784e-11	Bonferroni	UKB TG SNPs	Tier 3 (NB)
Cardiac arrest	0.337299	0.068335	9.05575e-07	Bonferroni	UKB TG SNPs	Tier 3 (NB)
*Alcoholic liver disease	-0.261105	0.054938	2.24008e-06	Bonferroni	UKB TG SNPs	Tier 3 (NB)
*Pain in throat and chest	0.0734931	0.0157146	3.2322e-06	Bonferroni	UKB TG SNPs	Tier 3 (NB)
*Diverticular disease of intestine	0.10083	0.0219271	4.68991e-06	Bonferroni	UKB TG SNPs	Tier 3 (NB)
*Hemorrhage from respiratory passages	0.138735	0.0309291	7.94122e-06	Bonferroni	UKB TG SNPs	Tier 3 (NB)
*Paroxysmal tachycardia	0.108426	0.0311683	0.000521138	Bonferroni	UKB TG SNPs	Tier 3 (NB)
*Calculus of kidney and ureter	0.119242	0.0344601	0.000557833	Bonferroni	UKB TG SNPs	Tier 3 (NB)
