# Supplementary material for: Phenome-wide Mendelian randomization study of plasma triglyceride levels and 2600 disease traits
Source: eLife. 2023 Mar 29;12:e80560. doi: 10.7554/eLife.80560 (PMC10079290; doi:10.7554/eLife.80560)
Supplement: Supplementary file 6. — Shown are the estimates, standard deviations, p-values, MR-PRESSO outlier test results, and the number of instruments used in bidirectional MR analyses estimating the causal effects of nine disease traits on plasma TG levels using IVW, MR-Egger, and Weighted Median methods. Exposure instruments were selected from UKB, and outcome instruments were selected from GLGC. [file elife-80560-supp6.xlsx]

## Sheet: Sheet1
Trait	Estimate	SD	P-value	log10P	Method	Significance	Outlier	nsnp
Disorders of lipoprotein metabolism	0.347724	0.101363	0.001829	2.73779	IVW	Bonferroni	<1e-04	30
Diverticular disease of intestine	-0.046286	0.0178604	0.0166547	1.77846	IVW	N	0.2669	23
Gout	0.00994421	0.00570572	0.124889	0.903476	IVW	N	0.4272	8
Hyperlipidemia	0.336986	0.101964	0.00260722	2.58382	IVW	Bonferroni	<1e-04	29
Hypertension	0.0213247	0.0202275	0.294627	0.530728	IVW	N	<1e-04	90
Myocardial infarction	0.056037	0.0707937	0.439526	0.357015	IVW	N	<1e-04	18
Angina pectoris	0.047845	0.0204513	0.0297993	1.52579	IVW	N	<1e-04	21
Coronary atherosclerosis	0.0213874	0.0319624	0.507559	0.294513	IVW	N	<1e-04	38
Ischemic heart disease	0.0297923	0.0437674	0.501462	0.299762	IVW	N	<1e-04	30
Disorders of lipoprotein metabolism	0.278125	0.253422	0.281782	0.550087	MR-Egger	N	<1e-04	30
Diverticular disease of intestine	0.0246841	0.0787611	0.757065	0.120867	MR-Egger	N	0.2669	23
Gout	0.0203951	0.00898816	0.0637454	1.19555	MR-Egger	N	0.4272	8
Hyperlipidemia	0.283327	0.254399	0.275219	0.560321	MR-Egger	N	<1e-04	29
Hypertension	-0.0534553	0.0730425	0.466212	0.331417	MR-Egger	N	<1e-04	90
Myocardial infarction	-0.165677	0.17007	0.344472	0.462846	MR-Egger	N	<1e-04	18
Angina pectoris	0.0271281	0.0533103	0.6167	0.209926	MR-Egger	N	<1e-04	21
Coronary atherosclerosis	-0.0457241	0.0693565	0.513923	0.289102	MR-Egger	N	<1e-04	38
Ischemic heart disease	-0.0544383	0.0985705	0.58514	0.23274	MR-Egger	N	<1e-04	30
Disorders of lipoprotein metabolism	0.135627	0.0252226	8.89408e-06	5.0509	Weighted Median	Bonferroni	<1e-04	30
Diverticular disease of intestine	-0.0370914	0.0252357	0.155774	0.807506	Weighted Median	N	0.2669	23
Gout	0.0135737	0.00635673	0.0701165	1.15418	Weighted Median	N	0.4272	8
Hyperlipidemia	0.126377	0.0252345	2.71256e-05	4.56662	Weighted Median	Bonferroni	<1e-04	29
Hypertension	0.0235373	0.020338	0.250243	0.601638	Weighted Median	N	<1e-04	90
Myocardial infarction	0.00252248	0.0146322	0.865164	0.0629014	Weighted Median	N	<1e-04	18
Angina pectoris	0.0512862	0.0193622	0.0154073	1.81227	Weighted Median	N	<1e-04	21
Coronary atherosclerosis	-0.000163022	0.01231	0.989505	0.00458196	Weighted Median	N	<1e-04	38
Ischemic heart disease	0	0.0167312	1	0	Weighted Median	N	<1e-04	30
